# Supplementary material for: Coupling Genome-wide Transcriptomics and Developmental Toxicity Profiles in Zebrafish to Characterize Polycyclic Aromatic Hydrocarbon (PAH) Hazard
Source: Int J Mol Sci. 2019 May 25;20(10):2570. doi: 10.3390/ijms20102570 (PMC6566387; doi:10.3390/ijms20102570)
Supplement: Supplementary file 1 [file ijms-20-02570-s001.zip]

Archive with 4 entries (4 files):
- Supplement file 1.xlsx
- Supplement file 2.xlsx
- Supplementary.docx
- Supplementary.pdf
