# Supplementary material for: Coupling Genome-wide Transcriptomics and Developmental Toxicity Profiles in Zebrafish to Characterize Polycyclic Aromatic Hydrocarbon (PAH) Hazard
Source: Int J Mol Sci. 2019 May 25;20(10):2570. doi: 10.3390/ijms20102570 (PMC6566387; doi:10.3390/ijms20102570)
Supplement: Supplementary file 1 [file ijms-20-02570-s001.zip › Supplement file 1.xlsx]

## Sheet: Table S1
PAH	Bin	ChemClass	LEL.any.except.MORT	LEL.any.effect	LEL.MO24	LEL.DP24	LEL.SM24	LEL.NC24	LEL.MORT	LEL.YSE_	LEL.AXIS	LEL.EYE_	LEL.SNOU	LEL.JAW_	LEL.OTIC	LEL.PE__	LEL.BRAI	LEL.SOMI	LEL.PFIN	LEL.CFIN	LEL.PIG_	LEL.CIRC	LEL.TRUN	LEL.SWIM	LEL.NC__	LEL.TR__	X24h.B.LEL	X24h.E.LEL	X24h.R.LEL	X5d.DARK.LEL	X5d.LIGHT.LEL	IHC.Vasculature	IHC.Liver	IHC.Skin	IHC.Neuromasts	IHC.Yolk	Transcriptomics
4H-cyclopenta[lmn]phenanthridine-5,9-dione	1	Heterocyclic	11.2	11.2	35.6				11.2	5	5	5	5	5	5	5	11.2	11.2	5	11.2			11.2	11.2	11.2	11.2					1
2-ethylanthraquinone	1	Oxygenated	11.2	11.2					35.6	11.2	11.2	11.2	11.2	11.2	11.2	11.2	11.2	11.2	11.2	11.2			11.2	11.2	11.2	11.2										Yes
Pyrene-4,5-dione	1	Oxygenated	1.12	1.12	3.56				3.56		1.12	1.12	1.12	1.12	1.12	1.12		1.12	1.12	1.12			1.12	1.12			1.12			0.1
Perinaphthenone	1	Oxygenated	5	5	50				35.6	11.2	11.2	11.2	11.2	11.2	11.2	11.2	11.2	11.2	11.2	11.2		5	11.2	11.2						1
Benzanthrone	1	Oxygenated	5	5						11.2	11.2	5	5	5	11.2	5	11.2	11.2	5	11.2			11.2	11.2				5		5
1,3-Dinitropyrene	1	Nitrated	0.1	0.1		1.12			0.5	0.5	0.1	0.5	0.5	0.5	0.5	0.5	0.5	0.5	0.5	0.5			0.5			0.5	0.5	0.1		0.1	0.1					Yes
1-Aminopyrene	1	Nitrated	5	5	35.6	5			11.2	5	11.2	5	5	5		5	11.2	11.2	11.2		5					11.2	5	5			1	Yes				Yes
3-hydroxyfluoranthene	1	Hydroxylated	5	5	11.2	5			5	5	5	5	5	5		5	5						5		5	5		5
4-hydroxychrysene	1	Hydroxylated	5	5	5	5			5	5		5	5	5		5	5									5		5
3-Nitrobenzanthrone	1	Nitrated	0.5	0.5		1.12				0.5	0.5	0.5	0.5	0.5		0.5			0.5	0.5						1.12	0.5	0.5					Yes			Yes
11-H-benzo[b]fluoren-11-one	1	Oxygenated	11.2	11.2						11.2	11.2	11.2	11.2	11.2	11.2	11.2	35.6		11.2	11.2			11.2			35.6						Yes	Yes
1,6-Dinitropyrene	1	Nitrated	1.12	1.12						1.12	5	1.12	1.12	1.12		1.12		3.56	1.12	3.56						3.56						Yes		Yes
3-hydroxybenz[a]anthracene	1	Hydroxylated	11.2	11.2					35.6	11.2	11.2	11.2	11.2	11.2		11.2	11.2				11.2		11.2			11.2					1	Yes
10-hydroxybenzo[a]pyrene	1	Hydroxylated		11.2	35.6				11.2	11.2		11.2	11.2	11.2	11.2	11.2	11.2		11.2												1	Yes
Xanthone	1	Heterocyclic	35.6	35.6						50	50	50	50	50	50	50	50	50	50	50			50	50						1	5		Yes
4h-cyclopenta[def]phenanthren-4-one	1	Oxygenated	35.6	11.2	11.2				11.2	35.6	35.6	35.6	35.6	35.6	35.6	35.6	35.6	50	35.6	11.2			11.2		50	35.6				5	11.2						Yes
3-hydroxyfluorene	1	Hydroxylated	35.6	35.6	50				35.6	35.6	35.6	35.6	35.6	35.6	35.6	35.6	35.6	35.6	35.6	35.6	35.6		35.6	35.6		35.6				11.2	1	Yes
9-Nitrophenanthrene	1	Nitrated	5	5					50	5	5	5	5	5		5			5												1		Yes
Retene	1	Methylated	11.2	11.2	50	35.6		35.6	35.6	11.2	11.2	11.2	11.2	11.2		11.2			11.2								50	35.6			11.2	Yes					Yes
4-hydroxyphenanthrene	1	Hydroxylated	5	5	35.6	5			11.2	11.2	11.2	11.2	11.2	11.2		11.2												5			5
5,6-Benzoquinoline	1	Heterocyclic	35.6	35.6	50	35.6	35.6	35.6	35.6	35.6	35.6	35.6	35.6	35.6		35.6		35.6	35.6	35.6		35.6				35.6				11.2	5
Dibenzo[a,l]pyrene	1	Parent	11.2	11.2		35.6			35.6	50	5			35.6		50			50	11.2						35.6					1					Yes
Acridine	1	Heterocyclic	35.6	35.6	50	35.6			35.6	35.6	35.6	35.6	35.6	35.6		35.6	50		35.6	50						50					5					Yes
5-Nitroacenaphthalene	1	Nitrated	35.6	11.2		35.6			35.6	35.6	35.6	35.6	35.6	35.6		35.6			50			50				35.6					1		Yes
1,5-dihydroxynaphthalene	1	Oxygenated	35.6	50		35.6			50	50	50	50	50	50		50			50												35.6	Yes
1,4-anthraquinone	1	Oxygenated	1.12	1.12	3.56				3.56		1.12																3.56			0.1	1.12
9,10-phenanthrenequinone	1	Oxygenated	1.12	1.12	3.56				1.12		1.12															1.12	5	1.12
9-aminophenanthrene	1	Aminated	11.2	11.2	35.6	35.6			35.6							11.2												11.2		1
1,4-phenanthrenedione	1	Oxygenated		1.12	1.12				0.5																		0.5	0.5		0.1		Yes
3-hydroxybenzo[e]pyrene	1	Hydroxylated	5	5	35.6	11.2			5		50																35.6	5		11.2	1
9-hydroxyphenanthrene	1	Hydroxylated	5	5	11.2	5			11.2																		11.2	5			1
3-hydroxyphenanthrene	1	Hydroxylated	5	5	11.2	5			5																		11.2	5
1,8-Dinitropyrene	1	Nitrated	3.56	3.56						5				5		5			5			3.56						0.5			1.12
1-hydroxypyrene	1	Hydroxylated	5	5	11.2				5	5																		1		1	1		Yes
1-hydroxyphenanthrene	1	Hydroxylated	11.2	5	35.6	11.2			11.2	11.2									11.2									5					Yes
Benzo[k]fluoranthene	2	Parent	1	1												35.6				1	1											Yes		Yes	Yes		Yes
3-nitrofluoranthene	2	Nitrated	5	5																		5										Yes				Yes	Yes
Benzo[j]fluoranthene	2	Parent	35.6	35.6																11.2	35.6									1	5	Yes		Yes	Yes		Yes
Dibenzo[b,k]fluoranthene	2	Parent	5	5																5	5									0.1	0.1	Yes		Yes	Yes
Dibenz[a,h]anthracene	2	Parent	5	5																5	5									1.12	0.1	Yes		Yes	Yes
1-hydroxynaphthalene	2	Hydroxylated	35.6	35.6		50			50	35.6																					11.2	Yes				Yes
2-hydroxynaphthalene	2	Hydroxylated	50	35.6					50	35.6						50			50							50					11.2
Benzo[b]fluorene	2	Parent	50	50						35.6									50												1	Yes
Pyrene	2	Parent	50	50						50	50					50			50							50				35.6	35.6		Yes
7-Nitrobenz[a]anthracene	2	Nitrated	50	50		50			50																					5	11.2			Yes
Carbazole	2	Heterocyclic	35.6	35.6		35.6										35.6														1	1	Yes	Yes				Yes
6-Methylchrysene	2	Methylated	50	50												50														5	35.6	Yes
acenaphthenequinone	2	Oxygenated		35.6	35.6				35.6																			35.6		5	11.2
1,2-naphthoquinone	2	Oxygenated		5					5																					0.5	0.5
Dibenzo[a,h]pyrene	4	Parent																											0.1	0.1	0.1	Yes	Yes	Yes	Yes		Yes
3,7-dinitrobenzo[k]fluoranthene	4	Nitrated																												0.5		Yes		Yes
1-hydroxyindeno[1,2,3-c,d]pyrene	4	Hydroxylated																												11.2		Yes		Yes
Coronene	4	Parent																												0.1		Yes
Xanthene	4	Heterocyclic																												11.2
1,8-Dimethylnaphthalene	4	Methylated																												5
Naphtho[1,2-b]fluoranthene	4	Parent																												0.1
1,2-Dimethylnaphthalene	4	Methylated																												1
Fluorene	4	Parent																												1
1-Methylnaphthalene	4	Methylated																												1
Chrysene	4	Parent																												11.2	35.6	Yes
1,6-Dimethylnaphthalene	4	Methylated																												1	35.6
1,3-dihydroxynaphthalene	4	Hydroxylated																												1	1		Yes
9-methylanthracene	4	Methylated																												1	11.2	Yes	Yes				Yes
1,4-Dimethylnaphthalene	4	Methylated																												1	1	Yes
Naphtho[2,3-e]pyrene	4	Parent																												0.1	0.1			Yes	Yes
1-Nitropyrene	4	Nitrated																												5	1					Yes
Triphenylene	6	Parent																												5	11.2
Chromone	6	Heterocyclic																												11.2	1
3-Nitrodibenzofuran	6	Nitrated																												1	5
1,5-dimethylnaphthalene	6	Methylated																												1	5						Yes
Acenaphthene	6	Parent																												1	5						Yes
Benzo[e]pyrene	6	Parent																												0.1	0.1
Benzo[g,h,i]perylene	6	Parent																												0.1	0.1
6H-benzo[cd]pyren-6-one	6	Hydroxylated																												0.1	0.1
anthraquinone	6	Oxygenated																												1.12	0.5
Naphthalene	6	Parent																												1	1
2-methylnaphthalene	6	Methylated																												1	1						Yes
1,6-dihydroxynaphthalene	6	Hydroxylated																												1	1
5,12-naphthacenequinone	3	Oxygenated		11.2	35.6				11.2																			35.6				Yes
Dibenz[a,c]anthracene	3	Parent		50	50				50																									Yes
7-nitrobenzo[k]fluoranthene	3	Nitrated	50	50		50										50																Yes		Yes
2-Nitroanthracene	3	Nitrated	50	50												50																				Yes
Dibenzofuran	3	Heterocyclic		35.6																												Yes
Dibenzo[a,i]pyrene	3	Parent																														Yes	Yes	Yes	Yes		Yes
Dibenzo[a,k]fluoranthene	3	Parent																																Yes
2-Nitrofluoranthene	3	Nitrated																																		Yes
8-methylquinoline	3	Heterocyclic																																		Yes
Naphtho[2,3-b]fluoranthene	8	Parent
2-Nitropyrene	8	Nitrated
2-Methylbenzofuran	8	Heterocyclic
6-Nitrobenzo[a]pyrene	8	Nitrated
Dibenzo[j,l]fluoranthene	8	Parent
Anthracene	8	Parent																																			Yes
2,6-Dimethylnaphthalene	8	Methylated
2,3-dihydroxynaphthalene	5	Hydroxylated																									35.6	5		11.2		Yes
2-Nitrodibenzothiophene	5	Nitrated																										1.12		0.1	0.1		Yes
3,6-Dimethylphenanthrene	5	Methylated																										35.6		5	11.2	Yes	Yes
Quinoline	5	Heterocyclic																										1
2-Nitrofluorene	5	Nitrated																										0.5			0.1		Yes
Thianaphthene	5	Heterocyclic																										5			5
9-fluorenone	5	Oxygenated	35.6																												50
Benzo[b]fluoranthene	5	Parent																													50	Yes		Yes			Yes
Anthrathrene	5	Parent																													50		Yes
Indole	5	Heterocyclic																													35.6					Yes
Acenaphthylene	5	Parent																													35.6
Naphtho[2,3-k]fluoranthene	5	Parent																													0.1			Yes	Yes
Indeno[1,2,3-c,d]pyrene	5	Parent																													1.12	Yes		Yes
6-Nitrochrysene	5	Nitrated																													1			Yes
Fluoranthene	5	Parent																													5	Yes	Yes				Yes
2,8-Dinitrodibenzothiophene	5	Nitrated																													0.1		Yes
3-Nitrophenanthrene	5	Nitrated																													1		Yes
Benzo[a]pyrene	5	Parent																													5			Yes		Yes
9-anthracene carbonitrile	5	Oxygenated																													5		Yes			Yes
2-Methylanthracene	7	Methylated																													11.2
2,3-Dimethylanthracene	7	Methylated																													11.2
9-anthracene carboxylic acid	7	Oxygenated																													11.2
Naphtho[2,3-j]fluoranthene	7	Parent																													3.56
1-Nitronaphthalene	7	Nitrated																													1
2,7-dihydroxynaphthalene	7	Hydroxylated																													1
2-Nitronaphthalene	7	Nitrated																													1
Benzo[c]phenanthrene[1,4]dione	7	Oxygenated																													1
Phenanthrene	7	Parent																													1						Yes
9-Nitroanthracene	7	Nitrated																													1

## Sheet: Table S2
	4h-CPdefP			Retene			BkF			BjF			Carbazole			DB(a,i)P			DB(a,h)P			9-MA			BbF			Fluoranthene			Acenaphthene			2-MN			Phenanthrene			Anthracene
Ensembl ID	Fold Change (log2)	Adjusted p-value (PADJ)	Ensembl ID	Fold Change (log2)	Adjusted p-value (PADJ)	Ensembl ID	Fold Change (log2)	Adjusted p-value (PADJ)	Ensembl ID	Fold Change (log2)	Adjusted p-value (PADJ)	Ensembl ID	Fold Change (log2)	Adjusted p-value (PADJ)	Ensembl ID	Fold Change (log2)	Adjusted p-value (PADJ)	Ensembl ID	Fold Change (log2)	Adjusted p-value (PADJ)	Ensembl ID	Fold Change (log2)	Adjusted p-value (PADJ)	Ensembl ID	Fold Change (log2)	Adjusted p-value (PADJ)	Ensembl ID	Fold Change (log2)	Adjusted p-value (PADJ)	Ensembl ID	Fold Change (log2)	Adjusted p-value (PADJ)	Ensembl ID	Fold Change (log2)	Adjusted p-value (PADJ)	Ensembl ID	Fold Change (log2)	Adjusted p-value (PADJ)	Ensembl ID	Fold Change (log2)	Adjusted p-value (PADJ)
ENSDARG00000001721	0.801967	1.98e-07	ENSDARG00000002196	0.58527	1.36e-06	ENSDARG00000002847	-0.596763	0.00119113	ENSDARG00000002197	0.763198	2.70451e-08	ENSDARG00000001721	0.777425	4.97e-07	ENSDARG00000003820	0.585054	0.000461724	ENSDARG00000001968	-0.609324	0.00019658	ENSDARG00000001910	-0.632075	3.09e-11	ENSDARG00000002026	-0.657654	7.75411e-05	ENSDARG00000002311	-0.816618	1.11902e-08	ENSDARG00000019949	-0.607796	0.00124942	ENSDARG00000101628	-0.590897	5.4e-06	ENSDARG00000012499	0.659104	5.48301e-09	ENSDARG00000092759	-0.597864	0.0422272
ENSDARG00000001910	-0.688845	9.81e-16	ENSDARG00000002311	-0.851235	4.03e-10	ENSDARG00000003216	-0.623861	1.25803e-08	ENSDARG00000003902	0.666458	0.000116491	ENSDARG00000001760	-0.587249	0.000971579	ENSDARG00000006220	0.73757	1.53e-08	ENSDARG00000002026	-0.614482	0.000189848	ENSDARG00000001993	-0.786484	3.2e-07	ENSDARG00000003544	-0.635398	0.000211227	ENSDARG00000010658	-0.763581	1.97321e-15	ENSDARG00000045768	0.713511	9.34355e-07				ENSDARG00000030896	-0.599608	0.000476744
ENSDARG00000004358	-0.910125	1.19e-08	ENSDARG00000002405	0.591164	6.08e-09	ENSDARG00000003902	0.609961	0.000731571	ENSDARG00000005713	0.998814	1.26317e-23	ENSDARG00000001993	-0.634726	5e-05	ENSDARG00000015495	0.667883	3.25e-08	ENSDARG00000002231	-0.73829	3.87e-06	ENSDARG00000004358	-0.851478	1.33e-07	ENSDARG00000003902	0.683667	6.47308e-05	ENSDARG00000012499	0.611496	6.3046e-08	ENSDARG00000058606	-0.649834	7.73125e-08				ENSDARG00000036028	-0.599571	7.7754e-08
ENSDARG00000004748	0.645374	1.29e-07	ENSDARG00000003902	0.878256	1.22e-08	ENSDARG00000006220	0.864911	1.26819e-12	ENSDARG00000006220	1.1691	8.08614e-24	ENSDARG00000004358	-0.860722	8.52e-08	ENSDARG00000019949	-0.736066	1.46e-07	ENSDARG00000003544	-0.631083	9.24e-05	ENSDARG00000006467	-0.778006	3.09e-11	ENSDARG00000004789	-0.596977	0.000660872	ENSDARG00000019949	-0.730801	4.06889e-07	ENSDARG00000061896	0.611273	0.00185186				ENSDARG00000045768	1.1179	1.29174e-22
ENSDARG00000004753	-0.674068	8.12e-05	ENSDARG00000004748	0.790485	2.57e-12	ENSDARG00000006868	0.917846	7.61263e-10	ENSDARG00000006978	0.610719	0.000643342	ENSDARG00000007788	-0.606763	3.86e-05	ENSDARG00000027088	0.776754	7.04e-08	ENSDARG00000004931	-0.650767	8.51e-05	ENSDARG00000011640	-0.894017	3.77e-10	ENSDARG00000004931	-0.654092	0.000168606	ENSDARG00000028804	-0.658446	0.000278178							ENSDARG00000058606	-1.01032	3.64998e-25
ENSDARG00000006467	-0.630681	2.99e-08	ENSDARG00000005713	0.983436	8.68e-23	ENSDARG00000014626	0.629817	2.12458e-11	ENSDARG00000014626	0.635434	1.73295e-11	ENSDARG00000007823	0.845926	8.52e-08	ENSDARG00000028396	1.01851	3.77e-14	ENSDARG00000005783	-0.641089	0.000108881	ENSDARG00000012126	-0.647682	6.17e-05	ENSDARG00000005713	0.590941	1.75252e-07	ENSDARG00000034503	0.592259	0.000264847							ENSDARG00000059001	-0.653923	2.43316e-08
ENSDARG00000007024	-0.669955	7.89e-05	ENSDARG00000006220	1.3099	3.01e-30	ENSDARG00000015654	-0.675273	2.59011e-10	ENSDARG00000017034	0.809265	2.23613e-13	ENSDARG00000010658	-0.599771	1.42e-08	ENSDARG00000029075	0.605168	3.25e-08	ENSDARG00000005786	-0.596562	0.000154538	ENSDARG00000014233	-0.58567	0.000541752	ENSDARG00000005915	-0.680661	7.9061e-06	ENSDARG00000038729	0.596071	0.00165125							ENSDARG00000061896	0.619479	0.000837885
ENSDARG00000008263	-0.672131	4.6e-07	ENSDARG00000007289	0.628466	3.04e-06	ENSDARG00000017739	0.595621	0.000424	ENSDARG00000020086	0.589526	1.48726e-05	ENSDARG00000011640	-0.76904	6.2e-08	ENSDARG00000030896	0.728811	7.04e-08	ENSDARG00000005915	-0.622899	5.98e-05	ENSDARG00000015732	-0.602601	0.000162149	ENSDARG00000006094	-0.679315	2.80548e-05	ENSDARG00000042816	0.618569	6.78562e-06							ENSDARG00000078567	1.04061	5.49909e-25
ENSDARG00000011640	-0.815213	9.31e-09	ENSDARG00000007950	0.665612	4.35e-05	ENSDARG00000020086	0.677518	9.62322e-08	ENSDARG00000023082	0.599297	0.000206142	ENSDARG00000012126	-0.631021	4.82e-05	ENSDARG00000034503	0.810871	6.11e-09	ENSDARG00000006094	-0.670413	2.87e-05	ENSDARG00000016854	-0.859356	3.87e-08	ENSDARG00000006220	0.972091	5.51248e-16	ENSDARG00000045768	1.19879	1.99782e-26							ENSDARG00000088745	0.659863	0.000837885
ENSDARG00000012126	-0.79933	7.53e-08	ENSDARG00000010940	0.707075	1.5e-05	ENSDARG00000021833	0.641551	1.14466e-17	ENSDARG00000024775	0.609973	4.89748e-06	ENSDARG00000014233	-0.738394	1.36e-06	ENSDARG00000043243	0.609948	0.000784459	ENSDARG00000006220	0.740839	5.59e-08	ENSDARG00000019902	-0.71434	3.07e-08	ENSDARG00000008398	-0.645248	0.000178678	ENSDARG00000058606	-0.928958	1.06521e-21							ENSDARG00000099024	0.611939	0.00294355
ENSDARG00000014233	-0.609112	0.000188317	ENSDARG00000014646	0.630037	3.9e-10	ENSDARG00000027088	1.06302	5.83412e-16	ENSDARG00000027088	0.919459	1.19687e-11	ENSDARG00000016854	-0.646921	8.15e-05	ENSDARG00000045768	1.20016	1.56e-26	ENSDARG00000008372	-0.645463	1.33e-08	ENSDARG00000023082	-0.605608	0.000310659	ENSDARG00000010565	-0.715511	2.47625e-05	ENSDARG00000058679	-0.649131	3.16193e-06
ENSDARG00000019902	-0.702756	1.05e-08	ENSDARG00000015144	0.632872	2.49e-07	ENSDARG00000030896	2.11145	2.39252e-77	ENSDARG00000028012	0.608429	0.000465257	ENSDARG00000019532	-0.628779	0.00033421	ENSDARG00000052618	1.1039	1.33e-14	ENSDARG00000008398	-0.710641	1.36e-05	ENSDARG00000028804	-0.590428	0.000934757	ENSDARG00000012499	0.679144	1.81426e-10	ENSDARG00000059001	-0.654177	1.11902e-08
ENSDARG00000021787	0.610821	1.86e-07	ENSDARG00000017034	0.770354	5e-12	ENSDARG00000032571	0.585504	0.000189135	ENSDARG00000030896	1.79045	5.01644e-55	ENSDARG00000019902	-0.655727	9.18e-08	ENSDARG00000056587	0.6769	9.41e-05	ENSDARG00000009493	-0.703074	1.74e-05	ENSDARG00000034007	-0.78626	7.37e-09	ENSDARG00000012586	-0.599298	2.38194e-05	ENSDARG00000061274	-0.804474	3.24528e-07
ENSDARG00000023082	-0.695693	7.99e-06	ENSDARG00000017195	0.894249	1.64e-26	ENSDARG00000036767	0.878419	7.98621e-13	ENSDARG00000038729	0.963675	8.69377e-11	ENSDARG00000024746	0.59129	5.88e-05	ENSDARG00000056885	0.909469	9e-09	ENSDARG00000010565	-0.732373	5.9e-06	ENSDARG00000037588	-0.841125	1e-10	ENSDARG00000012699	-0.621631	0.000374291	ENSDARG00000071341	0.977565	5.02908e-22
ENSDARG00000027236	-0.615079	0.00052838	ENSDARG00000019236	1.00642	1.29e-27	ENSDARG00000036840	-0.81276	1.34522e-12	ENSDARG00000043243	0.781685	5.27213e-07	ENSDARG00000026759	-0.66643	2.75e-08	ENSDARG00000058606	-0.964847	1.73e-23	ENSDARG00000012468	-0.599478	4.35e-06	ENSDARG00000037921	-0.853079	3.09e-11	ENSDARG00000014854	-0.700779	2.78673e-05	ENSDARG00000078567	1.26393	3.51378e-38
ENSDARG00000033832	-0.633702	7.23e-10	ENSDARG00000021149	0.927199	5.54e-17	ENSDARG00000042824	0.654405	1.04205e-12	ENSDARG00000043442	0.648657	6.25873e-08	ENSDARG00000027236	-0.666673	0.000104987	ENSDARG00000058679	-0.708162	9.66e-08	ENSDARG00000012586	-0.589217	4.08e-05	ENSDARG00000041382	-0.657244	7.9e-05	ENSDARG00000016348	-0.615447	6.25323e-05	ENSDARG00000088137	0.585658	2.10767e-06
ENSDARG00000034007	-0.767544	6.14e-09	ENSDARG00000021787	0.759831	1.92e-12	ENSDARG00000043243	0.871698	4.73089e-09	ENSDARG00000051925	0.61281	0.000690483	ENSDARG00000027495	-0.608507	3.36e-07	ENSDARG00000059001	-0.639004	1.92e-08	ENSDARG00000012699	-0.838429	1.1e-07	ENSDARG00000042872	-0.588451	0.000923683	ENSDARG00000016490	-0.682576	7.50359e-06	ENSDARG00000088140	-0.791846	2.20448e-11
ENSDARG00000036840	-0.612868	1.22e-06	ENSDARG00000021833	0.757237	4.61e-25	ENSDARG00000043442	0.760622	1.91528e-11	ENSDARG00000052215	0.75074	1.29733e-10	ENSDARG00000034007	-0.755764	1.42e-08	ENSDARG00000061481	0.689931	1.45e-05	ENSDARG00000013005	-0.592842	0.000493954	ENSDARG00000043806	-0.819475	1.81e-12	ENSDARG00000016667	-0.650921	0.000102112	ENSDARG00000098761	-0.671699	0.000198162
ENSDARG00000037588	-0.683887	1.06e-07	ENSDARG00000027088	0.679041	3.92e-06	ENSDARG00000045768	0.722865	3.39566e-09	ENSDARG00000055974	0.654087	2.33275e-06	ENSDARG00000036840	-0.608863	1.41e-06	ENSDARG00000061896	1.25382	2.1e-21	ENSDARG00000013020	-0.688992	2.23e-05	ENSDARG00000052700	-0.618414	1.7e-06	ENSDARG00000017034	0.728282	1.5956e-10	ENSDARG00000102435	0.608521	0.000980819
ENSDARG00000037921	-0.857891	2.21e-12	ENSDARG00000028012	0.641107	0.000113003	ENSDARG00000052215	0.786701	6.36685e-12	ENSDARG00000060439	-0.707323	2.01028e-05	ENSDARG00000037921	-0.712905	1.99e-08	ENSDARG00000068194	0.667813	8.79e-06	ENSDARG00000013072	-0.644714	1.59e-05	ENSDARG00000053364	-0.679506	1.7e-06	ENSDARG00000017220	-0.643203	6.39413e-05	ENSDARG00000104687	0.781367	5.95936e-07
ENSDARG00000040252	0.962375	1.35e-09	ENSDARG00000030896	1.49788	9.5e-38	ENSDARG00000052618	1.39613	4.33588e-24	ENSDARG00000061481	1.15068	2.36567e-17	ENSDARG00000038025	0.689075	2.02e-06	ENSDARG00000068934	1.32094	7.37e-30	ENSDARG00000013828	-0.769513	1.32e-06	ENSDARG00000054562	0.599415	0.000568706	ENSDARG00000017365	-0.610574	0.000497457	ENSDARG00000105341	0.781073	1.4824e-10
ENSDARG00000040466	-0.689657	7.99e-06	ENSDARG00000031952	-0.802859	1.62e-11	ENSDARG00000052705	-0.712488	2.7278e-11	ENSDARG00000061634	0.838047	2.21841e-15	ENSDARG00000040252	0.60178	0.0007119	ENSDARG00000070331	-0.656402	3.07e-07	ENSDARG00000014169	-0.609987	9.16e-05	ENSDARG00000056036	-0.813378	3.77e-10	ENSDARG00000018773	-0.640693	0.000181012
ENSDARG00000041382	-0.595665	0.000346779	ENSDARG00000032496	0.613228	9.7e-07	ENSDARG00000055534	-0.613508	0.000682899	ENSDARG00000061896	1.19433	1.33637e-19	ENSDARG00000040284	0.639574	5.4e-05	ENSDARG00000071567	0.620364	1.57e-06	ENSDARG00000014854	-0.763066	2.12e-06	ENSDARG00000056084	-0.641237	0.000205328	ENSDARG00000019949	-0.724644	2.57911e-07
ENSDARG00000041433	0.81828	4.52e-07	ENSDARG00000033364	0.693134	3.16e-12	ENSDARG00000060439	-1.01766	5.0661e-12	ENSDARG00000063661	0.670922	1.60758e-08	ENSDARG00000041382	-0.601469	0.000252202	ENSDARG00000074752	0.592607	3.61e-09	ENSDARG00000016348	-0.762328	2.56e-07	ENSDARG00000058606	-0.69926	2.91e-10	ENSDARG00000019963	-0.622665	0.000356182
ENSDARG00000042872	-0.727193	8.82e-06	ENSDARG00000033544	-0.612848	0.000167158	ENSDARG00000061481	0.744386	7.86663e-07	ENSDARG00000068934	2.12762	1.01477e-81	ENSDARG00000041394	0.740341	4.7e-07	ENSDARG00000076830	-0.668543	4.58e-08	ENSDARG00000016439	-0.671677	2.4e-05	ENSDARG00000060893	-0.632186	2.53e-05	ENSDARG00000020845	-0.588779	0.000208149
ENSDARG00000044441	-0.666399	2.68e-06	ENSDARG00000035890	0.622877	9.79e-10	ENSDARG00000061896	1.23295	4.51085e-21	ENSDARG00000070331	-0.858348	3.53724e-13	ENSDARG00000042816	0.684379	1.16e-07	ENSDARG00000077236	0.849848	5.32e-08	ENSDARG00000016490	-0.851902	1.01e-08	ENSDARG00000062661	-0.724792	9.65e-06	ENSDARG00000021305	-0.664093	0.00011921
ENSDARG00000052099	-0.709345	7.59e-06	ENSDARG00000037432	0.594385	6.19e-08	ENSDARG00000062632	-0.85073	8.95031e-11	ENSDARG00000070578	-0.602965	0.000412673	ENSDARG00000042872	-0.621741	0.000273288	ENSDARG00000077559	-0.617829	1.78e-06	ENSDARG00000016667	-0.790662	6.18e-07	ENSDARG00000074656	0.620786	0.000345325	ENSDARG00000025206	-0.682434	2.30189e-05
ENSDARG00000052575	-0.596434	0.000928308	ENSDARG00000038729	0.901762	2.02e-09	ENSDARG00000063661	0.630276	1.43083e-07	ENSDARG00000071173	-0.624811	4.76807e-06	ENSDARG00000043806	-0.617142	3.7e-08	ENSDARG00000078567	1.17804	1.16e-32	ENSDARG00000016788	-0.659131	1.64e-05	ENSDARG00000077341	-0.671492	8.32e-11	ENSDARG00000026988	-0.60189	0.000400023
ENSDARG00000052700	-0.59801	8.18e-07	ENSDARG00000043243	0.594916	0.000649103	ENSDARG00000068876	0.85589	1.65518e-10	ENSDARG00000071567	0.972077	9.70005e-18	ENSDARG00000052700	-0.629675	1.12e-07	ENSDARG00000079119	0.614989	2.6e-05	ENSDARG00000017220	-0.749878	1.32e-06	ENSDARG00000078440	-0.872068	5.8e-09	ENSDARG00000027088	0.610845	8.58716e-05
ENSDARG00000054797	-0.607525	0.00038721	ENSDARG00000043442	0.719546	4.97e-10	ENSDARG00000068910	-0.743957	3.93245e-10	ENSDARG00000071626	0.710126	2.82683e-05	ENSDARG00000053131	0.617269	5.34e-05	ENSDARG00000086826	1.26748	2.18e-39	ENSDARG00000017365	-0.659531	6.72e-05	ENSDARG00000078557	0.698857	2.69e-05	ENSDARG00000027497	-0.633015	0.000242707
ENSDARG00000055190	-0.60437	4.02e-10	ENSDARG00000043806	-0.626085	6.03e-09	ENSDARG00000068934	2.67321	4.0185e-130	ENSDARG00000074656	0.661186	0.000145153	ENSDARG00000055253	0.612656	0.000541255	ENSDARG00000089697	1.10443	2.87e-16	ENSDARG00000017785	-0.673004	2.8e-05	ENSDARG00000079946	-0.613208	0.000128552	ENSDARG00000028396	0.65487	1.85859e-05
ENSDARG00000055253	0.82018	4.6e-07	ENSDARG00000052215	0.62931	3.22e-07	ENSDARG00000070331	-1.03978	1.099e-19	ENSDARG00000076830	-0.94181	2.81356e-17	ENSDARG00000055294	0.603169	1.52e-05	ENSDARG00000091116	1.46388	1.16e-25	ENSDARG00000018393	-0.754787	1.66e-06	ENSDARG00000089156	-0.61593	0.00046005	ENSDARG00000028857	-0.633073	0.000277158
ENSDARG00000056036	-0.789061	4.02e-10	ENSDARG00000052618	1.69533	3.44e-36	ENSDARG00000070578	-0.589343	0.000594497	ENSDARG00000077559	-0.5946	4.60358e-06	ENSDARG00000056036	-0.732885	1.42e-08	ENSDARG00000093237	0.589739	0.00161659	ENSDARG00000018716	-0.60187	9.53e-05	ENSDARG00000092269	-0.833741	3.87e-08	ENSDARG00000030896	0.874959	5.83081e-12
ENSDARG00000062661	-0.693599	1.7e-05	ENSDARG00000053005	0.80163	4.41e-07	ENSDARG00000071173	-0.873336	1.34522e-12	ENSDARG00000078404	0.587763	1.72895e-06	ENSDARG00000056084	-0.605754	0.000645925	ENSDARG00000097491	0.752519	3.23e-20	ENSDARG00000018773	-0.712321	1.2e-05	ENSDARG00000092759	-0.660256	8.27e-05	ENSDARG00000033840	-0.597912	8.03593e-05
ENSDARG00000069615	-0.762302	2.68e-06	ENSDARG00000055186	0.587768	0.000210072	ENSDARG00000071567	0.742362	4.57407e-10	ENSDARG00000078962	-0.616059	0.000643342	ENSDARG00000060893	-0.663131	2.06e-06	ENSDARG00000098315	1.37137	1.84e-24	ENSDARG00000018896	-0.721439	4.88e-06	ENSDARG00000096313	-0.709118	7.47e-06	ENSDARG00000034503	0.709738	7.15736e-07
ENSDARG00000071341	0.759305	4.8e-12	ENSDARG00000055253	0.967784	1.79e-10	ENSDARG00000071626	0.724895	1.44984e-05	ENSDARG00000079119	0.748122	2.14942e-08	ENSDARG00000061274	-0.864487	2.01e-08	ENSDARG00000098746	0.832315	2.2e-09	ENSDARG00000019442	-0.702183	1.42e-05	ENSDARG00000097613	-0.599303	0.00047837	ENSDARG00000035127	-0.594719	0.000660872
ENSDARG00000076055	-0.668577	3.92e-05	ENSDARG00000055974	0.992981	5.56e-16	ENSDARG00000073695	0.677271	8.95244e-05	ENSDARG00000079302	-0.698708	1.84975e-13	ENSDARG00000061836	-0.586151	2.81e-05	ENSDARG00000099702	0.844083	1.4e-08	ENSDARG00000019963	-0.652927	8.47e-05	ENSDARG00000098761	-0.61356	0.000495061	ENSDARG00000035133	-0.666868	3.97712e-07
ENSDARG00000078052	-0.677718	1.17e-07	ENSDARG00000056638	0.712402	1.61e-09	ENSDARG00000073912	0.587104	0.000818616	ENSDARG00000086826	2.1599	4.8651e-121	ENSDARG00000062661	-0.753331	1.74e-06	ENSDARG00000101195	1.35561	6.1e-28	ENSDARG00000020057	-0.745443	3.22e-06	ENSDARG00000099299	-0.607841	0.000551265	ENSDARG00000035308	-0.651944	0.000116406
ENSDARG00000078440	-0.798845	8.17e-08	ENSDARG00000057633	0.605146	3.59e-06	ENSDARG00000074752	0.591454	1.12171e-09	ENSDARG00000089507	0.7466	1.10142e-08	ENSDARG00000074656	0.665304	9.86e-05	ENSDARG00000101364	1.19162	4.39e-16	ENSDARG00000020845	-0.775401	2.64e-07	ENSDARG00000101364	0.734486	1.4e-05	ENSDARG00000036156	-0.599064	0.000660872
ENSDARG00000078557	0.651785	8.41e-05	ENSDARG00000058734	1.06889	9.41e-19	ENSDARG00000076830	-0.989573	3.71367e-19	ENSDARG00000089697	1.16921	9.26715e-19	ENSDARG00000076055	-0.676224	2.58e-05	ENSDARG00000102558	0.696755	7.69e-06	ENSDARG00000021305	-0.848816	9.12e-08	ENSDARG00000102113	0.663263	1.19e-06	ENSDARG00000036626	-0.651087	0.000179576
ENSDARG00000092269	-0.812596	5.31e-08	ENSDARG00000059387	0.783166	2.18e-11	ENSDARG00000078567	0.822359	9.31603e-16	ENSDARG00000089936	0.731397	8.73441e-08	ENSDARG00000078052	-0.681512	8.52e-08	ENSDARG00000103199	0.934609	2.36e-09	ENSDARG00000022101	-0.586722	0.000219055	ENSDARG00000102393	-0.695822	1.67e-05	ENSDARG00000036985	-0.587423	0.00028935
ENSDARG00000094559	0.63608	0.000261201	ENSDARG00000059993	0.613371	2.84e-12	ENSDARG00000078962	-0.682233	7.44538e-05	ENSDARG00000090268	-0.63122	2.74216e-10	ENSDARG00000078440	-0.780871	1.27e-07	ENSDARG00000103456	-0.808022	1.9e-07	ENSDARG00000025206	-0.66225	1.24e-05	ENSDARG00000104329	-0.603098	0.000668252	ENSDARG00000039901	-0.647108	0.000183612
ENSDARG00000096313	-0.741699	8.18e-07	ENSDARG00000061481	1.19611	6.93e-19	ENSDARG00000079119	0.926719	1.89438e-13	ENSDARG00000091116	2.01118	2.25932e-50	ENSDARG00000078527	-0.613618	1.54e-05	ENSDARG00000105341	0.6045	3.24e-06	ENSDARG00000025299	-0.600804	0.000328921	ENSDARG00000107353	-0.597989	5.98e-05	ENSDARG00000042492	-0.636119	0.000126668
ENSDARG00000097613	-0.609046	0.000255629	ENSDARG00000061634	1.19865	1.01e-32	ENSDARG00000079302	-0.772462	1.12549e-16	ENSDARG00000091715	0.773666	3.83112e-07	ENSDARG00000079946	-1.01065	5.1e-13	ENSDARG00000105863	0.834514	1.08e-07	ENSDARG00000027082	-0.628182	6.24e-05				ENSDARG00000043627	-0.613518	0.000288486
ENSDARG00000098392	-0.611785	5.43e-06	ENSDARG00000061682	0.589799	3.83e-09	ENSDARG00000079602	0.585597	2.07813e-05	ENSDARG00000091996	0.630096	1.55427e-05	ENSDARG00000088140	-0.728418	7.47e-09				ENSDARG00000027088	0.703132	3.21e-06				ENSDARG00000043646	-0.607307	0.000435736
ENSDARG00000099008	-0.618269	0.000281748	ENSDARG00000061841	0.720322	6.37e-24	ENSDARG00000086826	2.06674	8.2019e-111	ENSDARG00000093584	0.641834	3.26923e-12	ENSDARG00000091234	0.845597	5.01e-08				ENSDARG00000027497	-0.763922	2.26e-06				ENSDARG00000045768	1.09474	3.06389e-22
ENSDARG00000102393	-0.710725	4.53e-06	ENSDARG00000061896	0.877011	4.28e-10	ENSDARG00000087440	-0.665353	0.000125026	ENSDARG00000097157	0.890236	5.11595e-09	ENSDARG00000092269	-0.84081	1.99e-08				ENSDARG00000027777	-0.594995	0.000476833				ENSDARG00000052215	0.616507	7.86591e-07
ENSDARG00000102430	-0.691465	9.93e-06	ENSDARG00000063297	0.59213	6.8e-05	ENSDARG00000088589	-0.628887	0.000443837	ENSDARG00000097491	1.26029	9.01802e-61	ENSDARG00000094559	0.620754	0.000380394				ENSDARG00000028857	-0.869493	4.46e-08				ENSDARG00000052618	0.641183	0.000116774
ENSDARG00000103413	-0.66965	2.02e-06	ENSDARG00000068551	0.593398	0.000474609	ENSDARG00000089507	1.00722	1.12549e-16	ENSDARG00000098058	0.789127	1.35027e-07	ENSDARG00000096313	-0.686644	7.03e-06				ENSDARG00000030896	0.686651	1.32e-06				ENSDARG00000054003	-0.608802	0.000330575
ENSDARG00000104502	0.712022	2.26e-05	ENSDARG00000068934	2.12902	6.85e-82	ENSDARG00000089586	0.638808	6.61949e-06	ENSDARG00000098315	2.07972	1.43669e-58	ENSDARG00000097613	-0.717632	5.64e-06				ENSDARG00000031095	-0.605808	0.000339938				ENSDARG00000054771	-0.687226	2.16746e-05
ENSDARG00000104687	0.707659	6.72e-06	ENSDARG00000071341	0.68641	2.04e-10	ENSDARG00000089667	-0.604052	0.000583144	ENSDARG00000098589	1.00246	7.103e-20	ENSDARG00000099336	-0.645879	1.02e-05				ENSDARG00000032197	-0.627443	8.11e-05				ENSDARG00000055154	-0.676981	2.30189e-05
			ENSDARG00000071567	1.22358	7.46e-29	ENSDARG00000089697	1.45415	6.92732e-30	ENSDARG00000098746	1.36995	3.2918e-28	ENSDARG00000099351	0.737269	8.37e-06				ENSDARG00000032761	-0.680103	3.52e-05				ENSDARG00000056885	0.767631	3.70072e-06
			ENSDARG00000073695	1.17043	1.08e-15	ENSDARG00000089936	0.594963	5.42124e-05	ENSDARG00000099702	1.09653	2.21841e-15	ENSDARG00000102393	-0.618702	0.000106315				ENSDARG00000032990	-0.707359	8.97e-06				ENSDARG00000057107	-0.591612	0.000660872
			ENSDARG00000073912	0.750155	1.2e-06	ENSDARG00000090268	-0.786423	1.73738e-16	ENSDARG00000100052	0.632089	4.02764e-06	ENSDARG00000103413	-0.624499	1.1e-05				ENSDARG00000033498	-0.610645	6.18e-07				ENSDARG00000057903	-0.682178	6.83007e-05
			ENSDARG00000074149	0.697986	9.74e-07	ENSDARG00000091116	2.37215	1.88045e-70	ENSDARG00000101195	2.51149	1.3425e-101	ENSDARG00000104773	0.594299	0.000885497				ENSDARG00000033840	-0.657785	9.37e-06				ENSDARG00000058248	-0.651824	0.000178678
			ENSDARG00000076534	0.617904	1.57e-05	ENSDARG00000091715	0.738987	1.55093e-06	ENSDARG00000101364	1.96325	5.75437e-47							ENSDARG00000035133	-0.630952	4.94e-06				ENSDARG00000058606	-1.05965	6.63636e-29
			ENSDARG00000076787	0.688205	3.92e-06	ENSDARG00000093048	0.650777	0.000145081	ENSDARG00000101789	1.44615	1.16904e-56							ENSDARG00000035308	-0.655879	6.23e-05				ENSDARG00000058679	-0.737612	1.23549e-08
			ENSDARG00000076830	-0.642359	1e-07	ENSDARG00000094281	0.59953	4.14955e-05	ENSDARG00000102558	0.603907	0.000233476							ENSDARG00000036626	-0.665086	5.5e-05				ENSDARG00000058702	-0.602221	0.000367215
			ENSDARG00000077549	0.641122	3.66e-08	ENSDARG00000097157	1.2369	3.31456e-18	ENSDARG00000103199	1.19787	1.43864e-16							ENSDARG00000036826	-0.734038	3.33e-06				ENSDARG00000058771	-0.661412	0.000116774
			ENSDARG00000078404	0.784943	2.57e-12	ENSDARG00000097491	1.27013	3.82616e-62	ENSDARG00000103456	-0.732063	4.0866e-06							ENSDARG00000036998	-0.743067	3.89e-06				ENSDARG00000059001	-0.726609	2.02207e-11
			ENSDARG00000078567	0.799077	1.38e-14	ENSDARG00000098058	0.830504	1.36374e-08	ENSDARG00000104068	1.81736	3.4795e-121							ENSDARG00000037813	-0.73031	1.1e-06				ENSDARG00000060148	-0.58697	0.000717266
			ENSDARG00000086826	1.96324	1.36e-99	ENSDARG00000098315	2.1786	1.99542e-64	ENSDARG00000104292	0.632144	0.000353464							ENSDARG00000038655	-0.738437	4.88e-06				ENSDARG00000060309	-0.601797	0.000641883
			ENSDARG00000087492	0.661665	1.1e-05	ENSDARG00000098589	1.55372	1.15047e-49	ENSDARG00000104973	0.590051	0.00131336							ENSDARG00000039901	-0.673142	3.49e-05				ENSDARG00000060551	-0.592342	0.000677764
			ENSDARG00000089507	1.22252	4.5e-25	ENSDARG00000098746	0.986315	3.86778e-14	ENSDARG00000105411	-0.628705	0.000126936							ENSDARG00000042114	-0.727956	7.96e-06				ENSDARG00000060865	-0.628295	0.000239267
			ENSDARG00000089586	1.14179	1.1e-20	ENSDARG00000099702	1.6128	4.72665e-34										ENSDARG00000042123	-0.708772	1.1e-05				ENSDARG00000061248	-0.68597	7.75823e-06
			ENSDARG00000089697	1.093	2.79e-16	ENSDARG00000100265	1.29948	1.23076e-27										ENSDARG00000042492	-0.664369	1.51e-05				ENSDARG00000061481	1.19128	1.77761e-18
			ENSDARG00000089936	1.08303	2.88e-18	ENSDARG00000101012	0.795207	5.87955e-13										ENSDARG00000042518	-0.761713	2.44e-06				ENSDARG00000061634	0.627554	4.35608e-08
			ENSDARG00000090401	0.659845	8.74e-05	ENSDARG00000101195	3.10432	4.6373e-156										ENSDARG00000043243	0.611148	0.000233178				ENSDARG00000061635	-0.705271	3.45068e-05
			ENSDARG00000091116	1.00755	6.24e-12	ENSDARG00000101364	2.09152	1.50777e-53										ENSDARG00000043553	-0.649664	8.83e-05				ENSDARG00000061896	1.06114	3.95655e-15
			ENSDARG00000091715	0.59445	0.00044398	ENSDARG00000101789	1.94797	1.2988e-106										ENSDARG00000043627	-0.731402	5.14e-06				ENSDARG00000061992	-0.678052	2.76176e-05
			ENSDARG00000093584	0.661641	4.48e-13	ENSDARG00000102558	0.922045	6.11545e-11										ENSDARG00000043646	-0.74128	4.7e-06				ENSDARG00000062248	-0.624401	0.000353792
			ENSDARG00000093936	0.651412	0.000175762	ENSDARG00000103199	1.20873	7.07226e-17										ENSDARG00000043757	-0.622757	2.06e-05				ENSDARG00000062974	-0.674403	9.45721e-05
			ENSDARG00000096545	0.778014	3.65e-07	ENSDARG00000103456	-0.835624	2.58007e-08										ENSDARG00000045094	-0.632736	0.000141974				ENSDARG00000063361	-0.689001	5.7491e-05
			ENSDARG00000097491	1.66022	4.7e-107	ENSDARG00000103981	-0.67057	4.39935e-06										ENSDARG00000045768	0.733774	2.88e-08				ENSDARG00000063594	-0.657171	0.000151813
			ENSDARG00000098315	2.05547	3.05e-57	ENSDARG00000104068	0.988172	5.37679e-35										ENSDARG00000046079	-0.589534	0.000301376				ENSDARG00000068934	1.17548	1.10759e-23
			ENSDARG00000098588	0.948439	2.72e-13	ENSDARG00000104292	0.832752	9.08355e-08										ENSDARG00000046150	-0.663199	1.55e-06				ENSDARG00000070214	-0.596621	0.000646547
			ENSDARG00000098589	0.86222	1.41e-14	ENSDARG00000105863	1.00907	5.16278e-12										ENSDARG00000052091	-0.625451	1.79e-06				ENSDARG00000071567	0.877412	3.71446e-14
			ENSDARG00000098746	1.70741	1.34e-44													ENSDARG00000052618	0.703153	4.5e-06				ENSDARG00000073912	0.888449	4.32203e-09
			ENSDARG00000098761	-0.605075	0.000674556													ENSDARG00000053326	-0.658996	6.89e-05				ENSDARG00000074245	-0.58847	8.15677e-08
			ENSDARG00000099313	0.617329	8.7e-07													ENSDARG00000053454	-0.634448	0.000132379				ENSDARG00000074723	-0.639369	0.000228509
			ENSDARG00000099702	2.04657	1.33e-55													ENSDARG00000053665	-0.703613	8.48e-06				ENSDARG00000074905	-0.604982	0.000327156
			ENSDARG00000101195	4.14743	4.45e-281													ENSDARG00000053771	-0.609966	0.000293702				ENSDARG00000075230	-0.640667	0.000184856
			ENSDARG00000101364	2.63213	1.07e-85													ENSDARG00000053804	-0.72833	7.96e-06				ENSDARG00000075928	-0.608938	0.000116406
			ENSDARG00000101789	3.16512	5.64e-290													ENSDARG00000054003	-0.728671	2.26e-06				ENSDARG00000076041	-0.596764	0.000646547
			ENSDARG00000103398	0.732093	1.13e-06													ENSDARG00000054253	-0.593714	0.000498422				ENSDARG00000076292	-0.603479	0.000179576
			ENSDARG00000103456	-0.632035	0.000147025													ENSDARG00000054690	-0.622676	9.09e-06				ENSDARG00000076830	-0.787059	1.23927e-11
			ENSDARG00000104068	1.96244	4.38e-142													ENSDARG00000054771	-0.835288	7.71e-08				ENSDARG00000076856	-0.613943	0.000270498
			ENSDARG00000104292	1.19435	8.39e-17													ENSDARG00000054941	-0.632321	0.00011913				ENSDARG00000076991	-0.690497	5.9415e-05
			ENSDARG00000104474	0.592999	3.37e-05													ENSDARG00000055133	-0.632698	2.07e-09				ENSDARG00000078227	-0.602038	0.000226325
																		ENSDARG00000055154	-0.7591	1.18e-06				ENSDARG00000078327	-0.622194	0.000220972
																		ENSDARG00000057903	-0.763157	2.43e-06				ENSDARG00000078567	1.0471	4.45774e-26
																		ENSDARG00000058248	-0.658145	6.86e-05				ENSDARG00000079064	-0.651453	0.000139961
																		ENSDARG00000058259	-0.586143	5.98e-06				ENSDARG00000079491	-0.60256	8.57764e-05
																		ENSDARG00000058565	-0.679881	2.66e-08				ENSDARG00000079741	-0.592619	0.000711442
																		ENSDARG00000058606	-0.61863	3.85e-08				ENSDARG00000079878	-0.60251	0.000628411
																		ENSDARG00000058702	-0.607075	0.000107572				ENSDARG00000086826	1.395	6.59264e-49
																		ENSDARG00000058771	-0.739365	5.31e-06				ENSDARG00000089507	0.746373	1.3572e-08
																		ENSDARG00000059090	-0.614722	0.00013539				ENSDARG00000089697	1.0214	5.69444e-14
																		ENSDARG00000060085	-0.681757	2.67e-05				ENSDARG00000089936	0.650672	5.79647e-06
																		ENSDARG00000060095	-0.601848	6.08e-05				ENSDARG00000091116	0.905677	3.34586e-09
																		ENSDARG00000060148	-0.661846	5.88e-05				ENSDARG00000091130	-0.726697	1.36927e-05
																		ENSDARG00000060309	-0.700254	1.79e-05				ENSDARG00000091715	0.629759	0.000122673
																		ENSDARG00000060372	-0.735765	1.95e-06				ENSDARG00000097491	0.912882	8.12981e-31
																		ENSDARG00000060551	-0.693827	1.49e-05				ENSDARG00000098315	1.1624	2.71062e-17
																		ENSDARG00000060597	-0.65205	5.58e-05				ENSDARG00000098511	-0.768614	2.79818e-06
																		ENSDARG00000060865	-0.870945	3.85e-08				ENSDARG00000098605	-0.674647	5.05375e-07
																		ENSDARG00000061021	-0.596919	1.06e-05				ENSDARG00000098746	1.15959	1.15693e-19
																		ENSDARG00000061248	-0.978746	1.47e-11				ENSDARG00000098857	-0.657001	8.83737e-05
																		ENSDARG00000061265	-0.662575	1.15e-05				ENSDARG00000099024	0.630366	0.000179576
																		ENSDARG00000061268	-0.630802	0.000116911				ENSDARG00000099096	-0.619832	0.000277158
																		ENSDARG00000061368	-0.730009	4.04e-06				ENSDARG00000099199	-0.592548	0.000220972
																		ENSDARG00000061481	0.898062	2.43e-09				ENSDARG00000099364	-0.621411	0.000379866
																		ENSDARG00000061635	-0.751625	3.22e-06				ENSDARG00000099437	-0.598664	0.000660872
																		ENSDARG00000061660	-0.602386	1.06e-06				ENSDARG00000099702	0.591263	0.000305895
																		ENSDARG00000061699	-0.585335	0.00013539				ENSDARG00000100592	-0.694481	4.27641e-05
																		ENSDARG00000061896	1.08176	1.65e-14				ENSDARG00000101195	2.38222	1.02187e-90
																		ENSDARG00000061992	-0.771232	9.1e-07				ENSDARG00000101364	1.20807	1.02907e-16
																		ENSDARG00000062248	-0.648843	8.89e-05				ENSDARG00000101687	-0.654804	0.000150703
																		ENSDARG00000062550	-0.607384	1.59e-05				ENSDARG00000101789	1.26274	1.61606e-42
																		ENSDARG00000062687	-0.733937	6.26e-07				ENSDARG00000102064	-0.626653	0.000229846
																		ENSDARG00000062812	-0.636636	1.23e-06				ENSDARG00000102142	-0.612319	0.000474083
																		ENSDARG00000062884	-0.646826	3.25e-05				ENSDARG00000102478	-0.624807	0.000181012
																		ENSDARG00000062974	-0.662671	6.08e-05				ENSDARG00000102612	-0.599218	0.000342459
																		ENSDARG00000063157	-0.59384	0.000272554				ENSDARG00000102773	-0.604458	0.000137477
																		ENSDARG00000063299	-0.593358	1.95e-06				ENSDARG00000104068	1.10024	3.0424e-43
																		ENSDARG00000063361	-0.766505	2.19e-06				ENSDARG00000104283	-0.616907	0.000277158
																		ENSDARG00000063594	-0.640913	0.000105435				ENSDARG00000104292	0.599881	0.000558462
																		ENSDARG00000063706	-0.609049	0.000132382				ENSDARG00000104483	-0.74467	3.70072e-06
																		ENSDARG00000068787	-0.679988	3.55e-05				ENSDARG00000105104	-0.667175	0.00011341
																		ENSDARG00000068934	1.08421	7.15e-18				ENSDARG00000106418	-0.726672	7.86591e-07
																		ENSDARG00000069958	-0.591756	0.000216565
																		ENSDARG00000070214	-0.61368	0.000190716
																		ENSDARG00000070227	-0.629172	0.000156533
																		ENSDARG00000070331	-0.815995	2.46e-10
																		ENSDARG00000070575	-0.664342	2.06e-05
																		ENSDARG00000071524	-0.626047	6.13e-07
																		ENSDARG00000071567	0.653514	7.92e-07
																		ENSDARG00000073743	-0.629781	0.000127979
																		ENSDARG00000073857	-0.609588	8.4e-05
																		ENSDARG00000074245	-0.609024	1.49e-07
																		ENSDARG00000074677	-0.686762	1.51e-07
																		ENSDARG00000074723	-0.629125	0.000173977
																		ENSDARG00000074905	-0.683437	2.22e-05
																		ENSDARG00000075230	-0.801428	6.18e-07
																		ENSDARG00000075928	-0.734131	1.41e-06
																		ENSDARG00000076041	-0.619845	0.000228483
																		ENSDARG00000076213	-0.597272	0.000459242
																		ENSDARG00000076292	-0.776798	3.81e-07
																		ENSDARG00000076830	-0.890143	1.65e-13
																		ENSDARG00000076856	-0.687177	2.06e-05
																		ENSDARG00000076991	-0.679749	3.25e-05
																		ENSDARG00000077384	-0.621698	5.34e-05
																		ENSDARG00000077474	-0.74687	2.05e-06
																		ENSDARG00000077656	-0.638161	1.59e-05
																		ENSDARG00000077686	-0.623647	8.55e-06
																		ENSDARG00000077761	-0.636615	8.47e-05
																		ENSDARG00000077909	-0.601934	0.000224538
																		ENSDARG00000078011	-0.719789	9.69e-06
																		ENSDARG00000078187	-0.686731	3e-05
																		ENSDARG00000078227	-0.810801	1.31e-07
																		ENSDARG00000078327	-0.59387	0.000200554
																		ENSDARG00000078567	0.673149	1.01e-08
																		ENSDARG00000078775	-0.633516	0.000127979
																		ENSDARG00000078979	-0.678581	1.06e-05
																		ENSDARG00000079064	-0.822213	2.55e-07
																		ENSDARG00000079119	0.66158	4.15e-06
																		ENSDARG00000079295	-0.649245	1.78e-05
																		ENSDARG00000079491	-0.666509	9.07e-06
																		ENSDARG00000079741	-0.707163	1.08e-05
																		ENSDARG00000079742	-0.620341	0.000175457
																		ENSDARG00000079811	-0.61339	9.55e-06
																		ENSDARG00000079878	-0.848349	8.24e-08
																		ENSDARG00000086224	-0.667398	3.46e-05
																		ENSDARG00000086826	1.23699	1.49e-33
																		ENSDARG00000087822	-0.691818	1.55e-05
																		ENSDARG00000088136	-0.721454	1.22e-07
																		ENSDARG00000089507	0.615174	1.59e-05
																		ENSDARG00000089538	-0.644311	2.87e-05
																		ENSDARG00000089691	-0.692029	7.24e-06
																		ENSDARG00000089697	1.05828	6.75e-14
																		ENSDARG00000091116	1.14322	1.31e-14
																		ENSDARG00000091130	-0.693669	1.53e-05
																		ENSDARG00000091408	-0.659455	4.22e-05
																		ENSDARG00000091548	-0.627592	1.95e-07
																		ENSDARG00000091598	-0.61057	3.63e-05
																		ENSDARG00000091619	-0.632369	2.87e-05
																		ENSDARG00000091792	-0.694808	7.96e-06
																		ENSDARG00000092644	-0.649703	9.16e-05
																		ENSDARG00000093799	-0.717373	1.38e-06
																		ENSDARG00000096920	-0.594106	0.000156076
																		ENSDARG00000097491	0.733167	1.41e-16
																		ENSDARG00000097650	-0.663033	5.93e-05
																		ENSDARG00000098315	1.21588	1.09e-19
																		ENSDARG00000098420	-0.71559	1.2e-05
																		ENSDARG00000098511	-0.82531	2.34e-07
																		ENSDARG00000098566	-0.604263	0.000265506
																		ENSDARG00000098605	-0.735344	9.56e-08
																		ENSDARG00000098746	0.820853	1.39e-08
																		ENSDARG00000098761	-0.618116	0.000227704
																		ENSDARG00000098857	-0.701604	5.98e-06
																		ENSDARG00000099024	0.616086	0.000200554
																		ENSDARG00000099096	-0.763469	1.95e-06
																		ENSDARG00000099199	-0.624077	7.48e-05
																		ENSDARG00000099364	-0.641142	0.000106699
																		ENSDARG00000099437	-0.684096	3.24e-05
																		ENSDARG00000099702	0.624109	3.4e-05
																		ENSDARG00000100402	-0.653469	4.45e-06
																		ENSDARG00000100562	-0.584987	0.000151011
																		ENSDARG00000100592	-0.629036	0.000119746
																		ENSDARG00000100679	-0.609248	0.000317639
																		ENSDARG00000101019	-0.630192	7.39e-05
																		ENSDARG00000101175	-0.601311	0.000333671
																		ENSDARG00000101195	1.39735	1.57e-27
																		ENSDARG00000101364	1.18009	2.89e-15
																		ENSDARG00000101713	-0.593263	6.9e-05
																		ENSDARG00000102095	-0.663663	2.22e-05
																		ENSDARG00000102142	-0.783888	1.3e-06
																		ENSDARG00000102331	-0.604468	0.000333671
																		ENSDARG00000102478	-0.670338	3.25e-05
																		ENSDARG00000102589	-0.633308	4.85e-05
																		ENSDARG00000102719	-0.656078	1.89e-05
																		ENSDARG00000102773	-0.731271	1.6e-06
																		ENSDARG00000103056	-0.68788	4.7e-06
																		ENSDARG00000103155	-0.611671	7.71e-08
																		ENSDARG00000103199	0.615803	0.000271187
																		ENSDARG00000103456	-0.621982	0.000136518
																		ENSDARG00000103576	-0.723304	1.79e-06
																		ENSDARG00000103906	-0.591995	0.000311369
																		ENSDARG00000104068	0.59173	5.25e-10
																		ENSDARG00000104283	-0.605999	0.000152619
																		ENSDARG00000104483	-0.849235	6.77e-08
																		ENSDARG00000104981	-0.633899	5.02e-05
																		ENSDARG00000105490	-0.775045	7.58e-08
																		ENSDARG00000105863	0.776864	1.32e-06
																		ENSDARG00000106418	-0.864551	3.58e-09
																		ENSDARG00000106989	-0.640636	4.79e-05

## Sheet: Table S3
ENSEMBL ID	GeneSymbol	Product	4h-CPdefP	Retene	BkF	3-NF	BjF	Carbazole	DB(a,i)P	DB(a,h)P	9-MA	BbF	Fluoranthene	1,5-DMN	Acenaphthene	2-MN	Phenanthrene	Anthracene
ENSDARG00000101195	CYP1C1	cytochrome P450, family 1, subfamily C, polypeptide 1 [Source:ZFIN;Acc:ZDB-GENE-050522-501]	0.283286	4.14743	3.10432	0.375068	2.51149	0.506238	1.35561	1.39735	0.450139	2.38222	0.492842	0.231617	0.151859	-0.0632271	0.256189	0.523367
ENSDARG00000086826	SULT6B1	sulfotransferase family, cytosolic, 6b, member 1 [Source:ZFIN;Acc:ZDB-GENE-050417-228]	0.292003	1.96324	2.06674	0.272806	2.1599	0.330257	1.26748	1.23699	0.37251	1.395	0.33713	0.0745681	0.150653	0.10839	0.146498	0.200565
ENSDARG00000101789	CYP1C2	cytochrome P450, family 1, subfamily C, polypeptide 2 [Source:ZFIN;Acc:ZDB-GENE-050705-1]	0.266553	3.16512	1.94797	0.34268	1.44615	0.0138959	0.528294	0.439601	0.303476	1.26274	0.38009	0.213816	0.00804448	0.161992	0.204665	0.269663
ENSDARG00000101364	WFIKKN1	WAP, follistatin/kazal, immunoglobulin, kunitz and netrin domain containing 1 [Source:ZFIN;Acc:ZDB-GENE-040426-2465]	0.358438	2.63213	2.09152	0.214713	1.96325	0.566671	1.19162	1.18009	0.734486	1.20807	0.50284	0.316324	0.318833	-0.0330345	0.190947	0.448899
ENSDARG00000061481	WU:FJ05G07	wu:fj05g07 [Source:ZFIN;Acc:ZDB-GENE-030131-7307]	0.535297	1.19611	0.744386	0.442745	1.15068	0.121478	0.689931	0.898062	0.417686	1.19128	0.27832	0.257702	0.251712	0.17455	0.401915	0.13296
ENSDARG00000068934	CYP1B1	cytochrome P450, family 1, subfamily B, polypeptide 1 [Source:ZFIN;Acc:ZDB-GENE-030902-1]	0.326569	2.12902	2.67321	-0.0115327	2.12762	0.391467	1.32094	1.08421	0.460416	1.17548	0.108639	0.138129	0.0725382	0.14473	0.0552391	0.306872
ENSDARG00000098315	CYP1A	cytochrome P450, family 1, subfamily A [Source:ZFIN;Acc:ZDB-GENE-011219-1]	0.094263	2.05547	2.1786	0.23688	2.07972	0.145663	1.37137	1.21588	0.307405	1.1624	0.257249	0.0388357	0.161117	0.0229632	0.113783	0.324936
ENSDARG00000098746	DHRS13L1	dehydrogenase/reductase (SDR family) member 13 like 1 [Source:ZFIN;Acc:ZDB-GENE-040426-1907]	0.341745	1.70741	0.986315	0.166457	1.36995	0.277883	0.832315	0.820853	0.0848332	1.15959	0.267425	-0.0503933	0.193048	-0.0548313	0.273607	0.0623158
ENSDARG00000104068	GSTP1	glutathione S-transferase pi 1 [Source:ZFIN;Acc:ZDB-GENE-020806-4]	-0.0691173	1.96244	0.988172	0.278734	1.81736	0.157003	0.540642	0.59173	0.370692	1.10024	0.13105	0.112845	0.0799452	0.0948318	0.0485495	0.191863
ENSDARG00000045768	CRY1AA	cryptochrome circadian clock 1aa [Source:ZFIN;Acc:ZDB-GENE-010426-2]	0.18689	0.577505	0.722865	-0.0437975	0.424255	-0.0430572	1.20016	0.733774	0.364184	1.09474	1.19879	0.0865765	0.713511	0.111788	1.1179	0.0968237
ENSDARG00000061896	SLCO2A1	solute carrier organic anion transporter family, member 2A1 [Source:ZFIN;Acc:ZDB-GENE-060606-3]	-0.0170131	0.877011	1.23295	0.0270415	1.19433	-0.0562241	1.25382	1.08176	0.391157	1.06114	0.380973	0.203832	0.611273	0.241756	0.619479	0.127363
ENSDARG00000078567	LONRF1L	LON peptidase N-terminal domain and ring finger 1, like [Source:ZFIN;Acc:ZDB-GENE-081104-397]	0.156467	0.799077	0.822359	0.24259	0.455303	0.0948049	1.17804	0.673149	0.168967	1.0471	1.26393	0.0749232	0.484543	0.149962	1.04061	0.179172
ENSDARG00000089697	NFE2L2B	nuclear factor, erythroid 2-like 2b [Source:ZFIN;Acc:ZDB-GENE-120320-3]	0.323507	1.093	1.45415	0.120598	1.16921	0.474449	1.10443	1.05828	0.432081	1.0214	0.560456	0.0835177	0.565418	0.18065	0.435347	0.256569
ENSDARG00000006220	UGT1AB	UDP glucuronosyltransferase 1 family a, b [Source:ZFIN;Acc:ZDB-GENE-040426-2762]	0.398099	1.3099	0.864911	0.147607	1.1691	0.504944	0.73757	0.740839	0.383101	0.972091	0.284046	0.0396503	0.229352	0.170386	0.0933782	0.302841
ENSDARG00000097491	UGT1B1	UDP glucuronosyltransferase 1 family, polypeptide B1 [Source:ZFIN;Acc:ZDB-GENE-080227-10]	0.29416	1.66022	1.27013	0.28669	1.26029	0.214199	0.752519	0.733167	0.276442	0.912882	0.320208	0.156917	0.0502623	-0.0834688	0.172355	0.112795
ENSDARG00000091116	PKHD1L1	polycystic kidney and hepatic disease 1 (autosomal recessive)-like 1 [Source:ZFIN;Acc:ZDB-GENE-060503-475]	0.314017	1.00755	2.37215	-0.012987	2.01118	-0.115355	1.46388	1.14322	0.199884	0.905677	0.35054	-0.056808	-0.0347662	-0.0825313	0.163389	0.176598
ENSDARG00000073912	SI:CH211-202H22.7	si:ch211-202h22.7 [Source:ZFIN;Acc:ZDB-GENE-090313-77]	0.36016	0.750155	0.587104	0.172105	0.578459	0.130248	0.490306	0.357513	0.182967	0.888449	0.0752383	0.0345451	0.0765771	0.179162	0.0269202	0.146216
ENSDARG00000071567	TSTD1	si:dkey-34l15.1 [Source:ZFIN;Acc:ZDB-GENE-081107-63]	0.0867836	1.22358	0.742362	0.185296	0.972077	0.210789	0.620364	0.653514	0.34329	0.877412	0.0737831	0.104361	0.241651	0.101208	0.103136	0.188348
ENSDARG00000030896	FOXQ1A	forkhead box Q1a [Source:ZFIN;Acc:ZDB-GENE-070424-74]	-0.251705	1.49788	2.11145	0.217956	1.79045	-0.381568	0.728811	0.686651	-0.180454	0.874959	-0.354577	0.00635311	-0.449694	0.112736	-0.599608	0.318971
ENSDARG00000056885	PER1A	period circadian clock 1a [Source:ZFIN;Acc:ZDB-GENE-011220-1]	-0.0472242	0.282551	0.485306	-0.0447383	0.43029	-0.0846122	0.909469	0.446295	0.0395473	0.767631	0.298855	0.089762	0.458847	0.228928	0.570298	0.048982
ENSDARG00000089507	UGT1B5	UDP glucuronosyltransferase 1 family, polypeptide B5 [Source:ZFIN;Acc:ZDB-GENE-080227-14]	0.278529	1.22252	1.00722	0.198723	0.7466	0.339918	0.526448	0.615174	0.292629	0.746373	0.211488	0.214602	-0.208465	-0.0655212	0.190743	0.0595834
ENSDARG00000017034	SQRDL	sulfide quinone reductase-like (yeast) [Source:ZFIN;Acc:ZDB-GENE-050417-436]	-0.0729629	0.770354	0.389871	0.208136	0.809265	0.14125	0.510724	0.487872	0.368351	0.728282	0.194981	0.175942	0.233599	-0.0510708	0.228133	0.180187
ENSDARG00000034503	PER2	period circadian clock 2 [Source:ZFIN;Acc:ZDB-GENE-011220-2]	0.258697	0.23555	0.217761	0.180244	0.0692638	0.187361	0.810871	0.295138	0.147501	0.709738	0.592259	0.0473791	0.140103	0.00531859	0.559911	0.0963017
ENSDARG00000003902	CTSL.1	cathepsin L.1 [Source:ZFIN;Acc:ZDB-GENE-040718-61]	0.00729194	0.878256	0.609961	0.172072	0.666458	0.172332	0.405362	0.371156	0.230175	0.683667	0.236586	-0.0417782	0.15573	0.220726	0.154745	0.144593
ENSDARG00000012499	PER1B	period circadian clock 1b [Source:ZFIN;Acc:ZDB-GENE-040419-1]	0.163716	0.527941	0.402609	-0.470366	0.210557	-0.562488	0.574502	0.36146	0.417288	0.679144	0.611496	0.250493	0.481439	0.198796	0.659104	-0.0201239
ENSDARG00000028396	FKBP5	FK506 binding protein 5 [Source:ZFIN;Acc:ZDB-GENE-030616-630]	-0.0790769	0.0909408	0.524873	-0.0827445	0.374633	-0.12953	1.01851	0.389114	-0.0562439	0.65487	-0.01758	0.129739	0.454173	0.0700707	0.350573	0.0725553
ENSDARG00000089936	SEPW2B	selenoprotein W, 2b [Source:ZFIN;Acc:ZDB-GENE-030428-2]	0.24579	1.08303	0.594963	0.0426536	0.731397	0.135435	0.530342	0.498155	0.217688	0.650672	0.11998	0.0825149	0.134076	-0.0737392	0.198309	0.147676
ENSDARG00000052618	AHRRB	aryl-hydrocarbon receptor repressor b [Source:ZFIN;Acc:ZDB-GENE-051018-2]	0.0713453	1.69533	1.39613	0.140131	1.28214	0.0397721	1.1039	0.703153	0.204138	0.641183	0.268611	0.0614396	0.24587	0.0767403	0.0150701	0.146391
ENSDARG00000099024	SI:CH211-188P14.5	si:ch211-188p14.5 [Source:ZFIN;Acc:ZDB-GENE-121214-312]	0.525119	0.424396	-0.160173	0.465466	0.334828	0.20542	0.302526	0.616086	0.327833	0.630366	0.392692	0.256726	0.483709	0.184688	0.611939	0.508942
ENSDARG00000091715	SI:DKEY-162H11.2	si:dkey-162h11.2 [Source:ZFIN;Acc:ZDB-GENE-121214-90]	0.254588	0.59445	0.738987	0.0180053	0.773666	0.0967265	0.397662	0.428712	0.203349	0.629759	0.266401	0.0320638	0.0832906	0.205867	0.348876	0.0956337
ENSDARG00000061634	AIFM4	apoptosis-inducing factor, mitochondrion-associated, 4 [Source:ZFIN;Acc:ZDB-GENE-070112-2282]	-0.10473	1.19865	0.417463	0.354298	0.838047	0.0466813	0.262203	0.377439	0.0854036	0.627554	-0.127609	0.0894083	-0.0416376	-0.0172074	-0.132747	0.199743
ENSDARG00000052215	BTR02	bloodthirsty-related gene family, member 2 [Source:ZFIN;Acc:ZDB-GENE-060825-228]	0.211547	0.62931	0.786701	-0.0615229	0.75074	0.00585269	0.46248	0.41495	0.263844	0.616507	0.100364	-0.0116006	0.0845146	0.30015	0.112391	0.259153
ENSDARG00000027088	PTGDSB.1	prostaglandin D2 synthase b, tandem duplicate 1 [Source:ZFIN;Acc:ZDB-GENE-030131-8436]	-0.0181748	0.679041	1.06302	0.322882	0.919459	-0.0435408	0.776754	0.703132	0.0686864	0.610845	0.181428	0.0919356	0.264191	0.35441	0.167478	0.0560144
ENSDARG00000104292	CTGFB	connective tissue growth factor b [Source:ZFIN;Acc:ZDB-GENE-070705-82]	0.285239	1.19435	0.832752	0.204851	0.632144	-0.0315374	0.350656	0.305251	0.257052	0.599881	0.179237	0.0386716	0.23546	0.0536178	0.17782	0.143448
ENSDARG00000099702	CABZ01103755.1	N/A	0.0196624	2.04657	1.6128	0.100135	1.09653	-0.040082	0.844083	0.624109	0.131423	0.591263	0.173122	-0.0430648	0.144949	0.0157827	0.0112892	0.0398791
ENSDARG00000005713	ETHE1	ethylmalonic encephalopathy 1 [Source:ZFIN;Acc:ZDB-GENE-040426-2503]	-0.16424	0.983436	0.47081	0.166233	0.998814	0.0133113	0.229064	0.329038	0.139487	0.590941	-0.145867	-0.0167028	-0.0820671	-0.0156929	-0.098739	0.103817
ENSDARG00000076554	CDKN1A	cyclin-dependent kinase inhibitor 1A [Source:ZFIN;Acc:ZDB-GENE-070705-7]	0.309224	0.0857885	0.130092	0.0286795	0.135134	0.228488	0.0514477	0.0867123	0.121988	0.56671	0.039781	0.0261926	0.283057	0.400736	0.0974864	0.0864771
ENSDARG00000089586	NCAM3	neural cell adhesion molecule 3 [Source:ZFIN;Acc:ZDB-GENE-131127-340]	0.244232	1.14179	0.638808	0.0922622	0.531474	0.201262	0.345154	0.459132	0.222606	0.557766	0.308734	0.0556405	0.277544	0.182296	-0.0147582	0.171335
ENSDARG00000102887	ABHD4	abhydrolase domain containing 4 [Source:ZFIN;Acc:ZDB-GENE-050417-83]	-0.131186	0.579212	0.306475	0.0593588	0.577423	0.199877	0.346922	0.350028	0.307359	0.547489	0.273642	0.077803	0.113453	-0.00125901	0.110299	0.0340053
ENSDARG00000079119	SI:CH211-229D2.5	si:ch211-229d2.5 [Source:ZFIN;Acc:ZDB-GENE-121214-200]	-0.109831	0.52262	0.926719	0.0162868	0.748122	0.0419569	0.614989	0.66158	-0.0954153	0.545217	0.0329546	0.042809	0.0198152	0.106524	-0.14293	0.0822809
ENSDARG00000043442	MAL	zgc:158773 [Source:ZFIN;Acc:ZDB-GENE-070424-9]	0.26891	0.719546	0.760622	0.168138	0.648657	0.163525	0.460023	0.472932	0.201797	0.545169	0.320948	0.121316	0.11534	0.144506	0.210952	0.123771
ENSDARG00000021787	ABCB5	ATP-binding cassette, sub-family B (MDR/TAP), member 5 [Source:ZFIN;Acc:ZDB-GENE-030131-6414]	0.610821	0.759831	0.212784	0.320402	0.437645	0.289284	0.139403	0.327313	0.433708	0.543972	0.246895	0.20458	0.131572	0.0424182	0.33459	0.19634
ENSDARG00000017195	FOXF2A	forkhead box F2a [Source:ZFIN;Acc:ZDB-GENE-110407-5]	-0.0168199	0.894249	0.520085	0.0605833	0.386677	0.22805	0.31747	0.325404	0.134144	0.53307	0.122813	0.289438	0.0382954	0.154689	0.083421	0.177999
ENSDARG00000074656	CTSS2.1	cathepsin S, ortholog2, tandem duplicate 1 [Source:ZFIN;Acc:ZDB-GENE-050522-559]	0.35947	0.548487	0.53526	0.192912	0.661186	0.665304	0.51505	0.341242	0.620786	0.532031	0.368632	0.0311984	0.327674	0.321572	0.259106	0.258105
ENSDARG00000055974	TPMT.1	thiopurine S-methyltransferase, tandem duplicate 1 [Source:ZFIN;Acc:ZDB-GENE-050522-141]	-0.0238429	0.992981	0.261437	0.159177	0.654087	0.0841583	0.374739	0.171862	0.1136	0.521946	0.164647	-0.0301524	-0.122908	0.0239855	-0.0175263	0.0328348
ENSDARG00000075014	SQSTM1	sequestosome 1 [Source:ZFIN;Acc:ZDB-GENE-040426-2204]	0.314719	0.574335	0.113194	0.410009	0.506614	0.560041	0.0834207	0.152208	0.261291	0.520983	0.208931	0.0937136	0.0150469	0.295096	-0.00991345	0.0424195
ENSDARG00000074149	ITPR1B	inositol 1,4,5-trisphosphate receptor, type 1b [Source:ZFIN;Acc:ZDB-GENE-070604-2]	0.415764	0.697986	0.455883	0.310268	0.475254	0.326709	0.31771	0.497338	0.280242	0.520404	0.425124	0.250283	0.367353	0.27708	0.408732	0.23482
ENSDARG00000104687	SLC16A9B	solute carrier family 16, member 9b [Source:ZFIN;Acc:ZDB-GENE-040801-69]	0.707659	0.211335	0.219395	-0.075486	0.188029	0.559703	0.296335	0.310912	0.234546	0.510631	0.781367	0.150481	0.422125	0.130961	0.188907	0.0576759
ENSDARG00000068194	KLF9	Kruppel-like factor 9 [Source:ZFIN;Acc:ZDB-GENE-060526-244]	0.0227197	0.191727	0.269809	0.0603271	0.306705	-0.0637312	0.667813	0.193615	0.00105993	0.504687	0.0670179	0.172931	0.43814	0.221399	0.178564	0.0645386
ENSDARG00000089706	ANPEP	si:ch211-276a23.5 [Source:ZFIN;Acc:ZDB-GENE-141215-4]	-0.0090016	0.54708	0.358359	0.0758904	0.373432	0.105639	0.287207	0.372485	0.0185621	0.497678	0.131883	-0.0209091	-0.0648686	0.0355587	-0.162128	0.185015
ENSDARG00000078683	RNF14	ring finger protein 14 [Source:HGNC Symbol;Acc:HGNC:10058]	0.4985	0.0577669	-0.0754971	0.170994	-0.127854	0.434947	-0.00601843	-0.0259803	0.259904	0.49401	0.0409826	0.121593	-0.0478102	0.231321	0.0926031	-0.0325419
ENSDARG00000077236	HSPB6	heat shock protein, alpha-crystallin-related, b6 [Source:ZFIN;Acc:ZDB-GENE-080214-7]	0.0748943	0.221986	0.47803	0.0398792	0.290728	0.00799849	0.849848	0.355342	-0.140693	0.492141	-0.00527929	0.247369	0.390996	0.0264086	0.171574	-0.0629346
ENSDARG00000093048	SI:CH211-158D24.4	si:ch211-158d24.4 [Source:ZFIN;Acc:ZDB-GENE-081104-141]	0.251003	0.493877	0.650777	0.0513067	0.45061	0.228501	0.195078	0.0878683	0.0552949	0.491077	0.0542804	0.228196	0.0658659	0.328504	0.184883	0.238551
ENSDARG00000097157	SI:CH211-207N23.2	si:ch211-207n23.2 [Source:ZFIN;Acc:ZDB-GENE-131121-310]	-0.0796723	0.38446	1.2369	-0.101244	0.890236	-0.0114346	0.499516	0.342802	0.183163	0.49078	0.0450016	0.0631146	0.0481201	0.022173	0.0405679	0.0960311
ENSDARG00000077549	AIFM2	apoptosis-inducing factor, mitochondrion-associated, 2 [Source:ZFIN;Acc:ZDB-GENE-050506-76]	-0.0634509	0.641122	0.409496	0.0932453	0.511949	0.0475503	0.286133	0.267778	0.0988794	0.490094	-0.0353603	0.061371	0.0652894	-0.0147345	0.202719	-0.0806894
ENSDARG00000074002	SLC6A11A	solute carrier family 6 (neurotransmitter transporter), member 11a [Source:ZFIN;Acc:ZDB-GENE-030131-3729]	0.285935	0.361961	0.381605	0.142977	0.413457	0.297741	0.287179	0.337519	0.198379	0.476883	0.0817577	0.105612	0.122283	0.0601684	0.244475	0.119146
ENSDARG00000015793	CREB3L1	cAMP responsive element binding protein 3-like 1 [Source:ZFIN;Acc:ZDB-GENE-030219-181]	0.0395482	0.0210324	0.290549	-0.0407038	0.253722	0.0589557	0.476554	0.48298	0.175516	0.474437	0.273023	0.14711	0.291188	0.171882	0.465579	0.17299
ENSDARG00000100190	SI:CH211-188P14.4	si:ch211-188p14.4 [Source:ZFIN;Acc:ZDB-GENE-121214-355]	0.352582	0.282365	-0.286054	0.105471	0.202122	0.104551	0.146311	0.430799	0.0609476	0.466018	0.263133	0.151758	0.101631	0.119069	0.435303	0.273507
ENSDARG00000060246	SLC16A6B	solute carrier family 16, member 6b [Source:ZFIN;Acc:ZDB-GENE-110208-3]	0.411347	0.0510005	0.221366	-0.301531	0.0817396	0.246296	0.301306	0.207747	0.142473	0.465761	0.54101	0.148939	0.364467	0.0592769	0.103311	-0.0831924
ENSDARG00000055186	CCR9A	chemokine (C-C motif) receptor 9a [Source:ZFIN;Acc:ZDB-GENE-060130-125]	-0.0884328	0.587768	0.184261	-0.0168356	0.341495	-0.0347307	0.262487	0.198459	-0.0788861	0.453333	0.0465259	-0.0952041	0.177343	-0.014273	0.0272045	0.16342
ENSDARG00000021149	CBR1L	carbonyl reductase 1-like [Source:ZFIN;Acc:ZDB-GENE-030131-9642]	0.071472	0.927199	0.332568	0.29281	0.528143	0.206284	0.165031	0.312208	0.302422	0.453204	0.0590613	0.00978719	0.179254	0.054866	0.212887	0.0132903
ENSDARG00000017739	AK5L	adenylate kinase 5, like [Source:ZFIN;Acc:ZDB-GENE-050410-2]	0.022557	0.46192	0.595621	0.296416	0.439136	0.292757	0.440713	0.510523	0.262474	0.450386	0.1572	0.270085	0.289078	0.294243	0.245199	0.239657
ENSDARG00000033160	NR1D1	nuclear receptor subfamily 1, group d, member 1 [Source:ZFIN;Acc:ZDB-GENE-050105-1]	0.113875	0.313309	0.315481	0.037403	0.232762	0.0372896	0.28831	0.262947	0.151765	0.449873	0.103407	0.180915	0.305218	0.185095	0.164788	0.105074
ENSDARG00000068876	ZGC:153031	zgc:153031 [Source:ZFIN;Acc:ZDB-GENE-060929-1190]	0.163897	0.460405	0.85589	0.0635776	0.385669	0.175605	0.447964	0.545453	0.186353	0.449462	-0.0927243	0.0303585	-0.047517	-0.0378082	0.0120319	-0.112878
ENSDARG00000071626	PTGDSB.2	prostaglandin D2 synthase b, tandem duplicate 2 [Source:ZFIN;Acc:ZDB-GENE-030911-3]	0.00481533	0.3982	0.724895	0.0855005	0.710126	0.0519451	0.583627	0.453844	0.108339	0.445663	0.152689	-0.120476	-0.0353312	0.0948457	-0.0134584	-0.04281
ENSDARG00000105590	SI:CABZ01007794.1	si:cabz01007794.1 [Source:ZFIN;Acc:ZDB-GENE-160728-147]	0.337875	0.348928	0.337038	0.111751	0.53521	0.0913427	0.336553	0.389535	0.183197	0.445663	0.244506	0.0866786	0.139817	0.0250545	0.293081	0.117301
ENSDARG00000098620	SI:CH211-188P14.2	si:ch211-188p14.2 [Source:ZFIN;Acc:ZDB-GENE-121214-329]	0.323817	0.289721	-0.193602	0.0748122	0.308209	0.06882	0.0997023	0.310814	0.160262	0.445489	0.293107	0.108058	0.215743	0.0627584	0.478095	0.420455
ENSDARG00000038729	S100Z	S100 calcium binding protein Z [Source:ZFIN;Acc:ZDB-GENE-050522-69]	-0.0207722	0.901762	0.434832	0.213307	0.963675	0.278213	0.433354	0.198027	0.279128	0.444816	0.596071	0.166264	0.388712	0.057021	0.254647	0.141791
ENSDARG00000009123	SELE	selectin E [Source:ZFIN;Acc:ZDB-GENE-041014-221]	-0.0175465	0.237442	0.414385	0.0134454	0.324602	0.261857	0.145332	0.284652	0.0111747	0.441276	0.18198	-0.0199829	0.157832	0.052786	0.00735215	0.0529028
ENSDARG00000102435	PLEKHF1	pleckstrin homology domain containing, family F (with FYVE domain) member 1 [Source:ZFIN;Acc:ZDB-GENE-040426-1289]	0.44381	0.0403962	0.040508	0.254309	0.096578	0.475627	0.32196	0.316774	0.430498	0.437715	0.608521	0.212661	0.0873238	0.135218	0.55987	0.0802442
ENSDARG00000090401	CABZ01020840.1	N/A	0.53112	0.659845	0.155003	0.115624	0.218903	0.511532	0.15313	0.0399994	0.29074	0.43744	0.301409	-0.00401308	0.193919	0.208276	0.200928	0.119281
ENSDARG00000098058	IM:7150988	im:7150988 [Source:ZFIN;Acc:ZDB-GENE-050309-169]	0.172563	0.510541	0.830504	0.0427511	0.789127	0.106026	0.507804	0.441915	0.229791	0.434639	0.0365346	0.0996984	-0.129915	-0.00530456	-0.0144282	-0.0517922
ENSDARG00000027529	HMOX1A	heme oxygenase 1a [Source:ZFIN;Acc:ZDB-GENE-030131-3102]	0.152115	0.382575	0.219182	-0.155774	0.10333	0.434567	0.409375	0.263955	-0.000869353	0.434259	0.0630916	0.107189	-0.0416441	-0.105673	-0.13612	-0.240753
ENSDARG00000098589	CYB5A	cytochrome b5 type A (microsomal) [Source:ZFIN;Acc:ZDB-GENE-040426-2148]	0.082722	0.86222	1.55372	-0.127717	1.00246	0.191465	0.469129	0.418297	0.138099	0.43007	0.134027	0.0559033	0.0290498	-0.0146053	0.0438991	0.000374355
ENSDARG00000045141	AQP8A.1	aquaporin 8a, tandem duplicate 1 [Source:ZFIN;Acc:ZDB-GENE-040912-106]	0.32476	0.0926486	0.490876	0.0289435	0.57014	0.497321	0.509598	0.524796	0.425296	0.428154	0.377775	0.151444	0.0111557	-0.0778287	0.124268	0.164595
ENSDARG00000095751	LEG1.2	liver-enriched gene 1, tandem duplicate 2 [Source:ZFIN;Acc:ZDB-GENE-040426-2281]	-0.0318806	0.31166	0.238704	-0.0909649	0.495871	-0.212269	0.238318	0.37955	-0.0431081	0.427335	0.207104	0.179718	0.324425	0.104968	0.192627	0.040679
ENSDARG00000021833	AHR2	aryl hydrocarbon receptor 2 [Source:ZFIN;Acc:ZDB-GENE-990714-16]	-0.0225522	0.757237	0.641551	0.0325077	0.42945	0.0239105	0.425882	0.338597	0.0871832	0.423703	0.131112	0.032289	0.0632905	0.0301586	0.107745	0.0977475
ENSDARG00000070353	HOXC13A	homeobox C13a [Source:ZFIN;Acc:ZDB-GENE-000822-4]	0.167185	0.520782	0.56199	0.149592	0.545736	0.255329	0.353236	0.286918	0.272796	0.422796	0.100485	0.166967	0.256161	0.212473	0.26057	0.0764145
ENSDARG00000091994	ZNF1046	zinc finger protein 1046 [Source:ZFIN;Acc:ZDB-GENE-030131-2092]	0.278122	0.376332	0.0738135	-0.0391286	0.251864	0.00427881	0.0708838	0.133478	-0.0074188	0.42056	0.345365	0.0898598	0.290055	0.0937901	0.206161	0.167922
ENSDARG00000058734	PRDX1	peroxiredoxin 1 [Source:ZFIN;Acc:ZDB-GENE-050320-35]	0.275956	1.06889	0.457424	0.201369	0.233361	0.211638	0.0558165	0.205246	0.439614	0.418821	-0.00789886	0.158838	0.158124	0.0850272	0.252072	0.0895043
ENSDARG00000093237	SI:CH211-89O9.4	si:ch211-89o9.4 [Source:ZFIN;Acc:ZDB-GENE-090313-134]	-0.00188188	0.44097	0.376864	-0.0186987	0.30505	0.0729282	0.589739	0.416417	0.300454	0.415923	-0.00826205	0.169104	0.188184	0.116177	0.464631	0.000471323
ENSDARG00000055045	CASP3B	caspase 3, apoptosis-related cysteine peptidase b [Source:ZFIN;Acc:ZDB-GENE-070607-1]	0.0720832	0.539112	0.462274	0.131611	0.449792	0.0437728	0.409742	0.493458	0.10229	0.415277	0.0424178	0.113411	0.0844808	0.0324318	0.10178	0.0296137
ENSDARG00000100739	CABZ01052573.1	N/A	0.23139	0.302017	0.286434	0.089002	0.354265	0.115779	0.319938	0.377254	0.146848	0.414895	0.212073	0.122026	0.242792	0.00342519	0.222678	0.0788218
ENSDARG00000088137	ADGRG2A	adhesion G protein-coupled receptor G2a [Source:ZFIN;Acc:ZDB-GENE-140106-206]	0.241523	0.314908	0.419527	0.154536	0.226764	0.064607	0.5216	0.327196	-0.0265773	0.409913	0.585658	0.0414871	0.34004	0.0829623	0.422392	0.139116
ENSDARG00000099538	SI:CH211-188P14.3	si:ch211-188p14.3 [Source:ZFIN;Acc:ZDB-GENE-121214-334]	0.261641	0.182286	-0.34879	-0.0303386	0.0220964	-0.0324289	0.0692546	0.173291	-0.0711713	0.408665	0.0785851	0.0476991	-0.0488928	-0.1045	0.465014	-0.0215053
ENSDARG00000098588	GCHFR	GTP cyclohydrolase I feedback regulator [Source:ZFIN;Acc:ZDB-GENE-040426-1731]	0.1339	0.948439	0.513431	0.179628	0.324833	0.281941	0.288626	0.300286	0.0836464	0.407839	0.217331	0.177878	0.294482	6.64e-05	0.234594	0.0799305
ENSDARG00000104381	BX914218.1	N/A	-0.10442	0.494171	0.23708	-0.0407057	0.457213	0.230979	0.270073	0.269886	-0.0529616	0.404289	0.11035	0.106748	0.00775197	-0.11757	0.0064743	-0.0216173
ENSDARG00000019236	GSR	glutathione reductase [Source:ZFIN;Acc:ZDB-GENE-050522-116]	-0.0554346	1.00642	0.174904	0.188715	0.556125	0.04297	-0.0366902	0.0878875	-0.0130574	0.40397	-0.0662809	-0.0129513	-0.0573561	-0.0974948	-0.0851054	-0.0373003
ENSDARG00000094281	SI:CH73-196I15.3	si:ch73-196i15.3 [Source:ZFIN;Acc:ZDB-GENE-091116-4]	-0.00645807	0.336059	0.59953	0.0850799	0.272133	0.00948829	0.35216	0.364577	0.00450733	0.403848	0.0581746	0.0534434	0.260196	0.0450691	0.182526	0.155662
ENSDARG00000077874	VWA10.1	von Willebrand factor A domain containing 10, tandem duplicate 1 [Source:ZFIN;Acc:ZDB-GENE-090313-291]	-0.240596	0.109828	0.13964	0.0907923	0.121405	0.0100393	0.190786	0.0999456	-0.0510665	0.401629	0.0179832	0.076781	0.201734	-0.0492373	0.176169	0.0286046
ENSDARG00000042824	NFE2L2A	nuclear factor, erythroid 2-like 2a [Source:ZFIN;Acc:ZDB-GENE-030723-2]	-0.037173	0.502973	0.654405	-0.080236	0.392174	0.037126	0.424319	0.342376	0.192171	0.400334	0.0465246	0.0274222	0.0243835	-0.056126	0.238372	0.0876819
ENSDARG00000014386	GALNT6	UDP-N-acetyl-alpha-D-galactosamine:polypeptide N-acetylgalactosaminyltransferase 6 (GalNAc-T6) [Source:ZFIN;Acc:ZDB-GENE-040426-2272]	0.337752	0.432772	0.313407	-0.00906614	0.447138	0.253598	0.234077	0.363824	0.170605	0.399136	0.267231	0.231831	0.186455	-0.0357676	0.347451	0.0152113
ENSDARG00000053005	CD22	cd22 molecule [Source:ZFIN;Acc:ZDB-GENE-050522-521]	0.156194	0.80163	0.534789	0.140899	0.300471	0.236092	0.317061	0.475882	0.378739	0.398922	0.269525	0.215594	0.114499	0.189654	0.117968	0.145565
ENSDARG00000106724	CU655961.7	N/A	0.163659	0.384529	0.16826	0.0922687	0.207128	-0.0213851	0.324062	0.286784	0.202906	0.397889	0.233345	0.235949	0.243779	0.102935	0.365431	0.165087
ENSDARG00000104015	FGFR1BL	fibroblast growth factor receptor 1b, like [Source:ZFIN;Acc:ZDB-GENE-091204-406]	0.342705	0.280753	0.198847	0.521825	0.381497	0.246538	0.433542	0.376877	0.224926	0.397562	0.409715	0.480473	0.233835	0.258371	0.390017	0.254655
ENSDARG00000028096	SI:CH211-95J8.2	si:ch211-95j8.2 [Source:ZFIN;Acc:ZDB-GENE-091204-28]	0.227286	0.476726	0.390937	0.114432	0.502358	0.325557	0.157045	0.273531	0.246149	0.395212	0.26187	0.168096	0.137733	0.118188	0.172555	0.0621347
ENSDARG00000004748	ZGC:100868	zgc:100868 [Source:ZFIN;Acc:ZDB-GENE-040801-33]	0.645374	0.790485	0.270385	0.124661	0.439923	0.33492	0.17821	0.270765	0.273527	0.39514	0.519981	0.0200798	0.0469782	0.13677	0.122869	-0.0128421
ENSDARG00000020794	NEUROD6B	neuronal differentiation 6b [Source:ZFIN;Acc:ZDB-GENE-010608-2]	-0.231185	0.169155	0.368276	0.179562	0.489484	0.0106822	0.47731	0.426713	-0.1769	0.3937	0.0931839	0.271555	0.315316	0.176728	0.135093	0.340369
ENSDARG00000040644	PXYLP1	2-phosphoxylose phosphatase 1 [Source:ZFIN;Acc:ZDB-GENE-040718-127]	0.0270812	0.2445	0.20318	0.210542	0.335329	0.173485	0.376685	0.333212	0.182898	0.393404	0.340525	-0.0646507	0.263122	0.00735337	0.227804	0.326698
ENSDARG00000051925	CYB5R2	cytochrome b5 reductase 2 [Source:ZFIN;Acc:ZDB-GENE-060825-83]	-0.234523	0.565771	0.0920215	0.0499938	0.61281	-0.024133	0.171616	0.0441199	0.0350176	0.390214	0.0532384	0.132089	0.0482586	0.0657231	-0.163061	0.0359494
ENSDARG00000105545	SI:DKEY-165A24.10	si:dkey-165a24.10 [Source:ZFIN;Acc:ZDB-GENE-160728-16]	0.268629	0.249756	0.18691	0.10353	0.174516	0.172251	0.161301	0.31675	0.328257	0.390169	0.267419	0.179041	0.289145	0.174746	0.255845	0.0937118
ENSDARG00000105367	SI:DKEY-88N24.11	si:dkey-88n24.11 [Source:ZFIN;Acc:ZDB-GENE-160113-7]	0.320917	0.320892	0.039048	-0.0534042	0.324264	-0.0660582	-0.000980653	0.218364	0.273246	0.38988	0.281169	0.282009	0.0671471	0.140695	0.471418	-0.0736812
ENSDARG00000063665	MAT2AL	methionine adenosyltransferase II, alpha-like [Source:ZFIN;Acc:ZDB-GENE-060421-5255]	0.112626	0.0283362	-0.149091	0.168145	-0.176722	0.0511316	0.0127472	-0.0530312	-0.0211483	0.388205	-0.0266598	0.0427786	0.10767	0.0437481	0.0442171	-0.0202514
ENSDARG00000014646	AOC2	amine oxidase, copper containing 2 [Source:ZFIN;Acc:ZDB-GENE-050320-133]	-0.136521	0.630037	0.468391	-0.114508	0.480215	-0.130841	0.301745	0.217986	-0.181292	0.387565	0.073914	0.00282287	0.123744	-0.0717392	0.0634174	-0.00363615
ENSDARG00000090635	KCNJ1A.4	potassium inwardly-rectifying channel, subfamily J, member 1a, tandem duplicate 4 [Source:ZFIN;Acc:ZDB-GENE-050420-186]	0.0421862	-0.161302	0.21595	-0.032767	0.183104	-0.0374056	0.059552	0.00337409	-0.14537	0.385932	0.0594977	-0.00577447	0.0670192	0.0902259	-0.232295	0.166942
ENSDARG00000044684	RBP4L	retinol binding protein 4, like [Source:ZFIN;Acc:ZDB-GENE-030131-7591]	0.0552439	0.0153099	0.100749	0.0791896	0.26515	0.302484	0.214108	0.371016	0.096282	0.384213	-0.0513115	0.147722	0.0623441	0.203152	0.0219638	0.127022
ENSDARG00000068947	SI:CH211-264E16.1	si:ch211-264e16.1 [Source:ZFIN;Acc:ZDB-GENE-060503-226]	0.0188331	0.00201675	0.378489	0.1233	0.306111	0.0521081	0.480031	0.407238	-0.00325111	0.382841	0.00132875	-0.00830239	0.132794	-0.0667077	0.0760051	0.0262087
ENSDARG00000063661	NUAK2	NUAK family, SNF1-like kinase, 2 [Source:ZFIN;Acc:ZDB-GENE-050208-563]	0.11782	0.45348	0.630276	0.0460179	0.670922	0.254982	0.409071	0.547603	0.105814	0.381779	0.296346	0.224048	0.278357	0.169744	0.302275	0.167673
ENSDARG00000033364	MGST3B	microsomal glutathione S-transferase 3b [Source:ZFIN;Acc:ZDB-GENE-061215-48]	0.068077	0.693134	0.278588	0.135399	0.393219	0.0996173	0.213367	0.234607	0.113065	0.380892	-0.0403598	0.0328765	0.0848287	0.110782	-0.0175765	0.0158203
ENSDARG00000089919	SI:CH211-161H7.8	si:ch211-161h7.8 [Source:ZFIN;Acc:ZDB-GENE-091204-302]	-0.180947	0.522662	0.151872	-0.019861	0.224139	0.0631796	0.299185	0.28378	0.0947044	0.379886	-0.0382386	0.0871708	0.156804	-0.00657378	0.0674284	-0.0925474
ENSDARG00000078404	CDH26.1	cadherin 26, tandem duplicate 1 [Source:ZFIN;Acc:ZDB-GENE-100922-193]	0.257409	0.784943	0.494844	0.161261	0.587763	0.165009	0.500713	0.388844	0.274637	0.379378	0.298072	0.147894	0.151075	0.20702	0.273212	0.185914
ENSDARG00000097635	WU:FB18F06	wu:fb18f06 [Source:ZFIN;Acc:ZDB-GENE-030131-261]	-0.05938	0.472417	0.0916242	-0.0347155	0.503541	0.0532013	0.18547	0.245098	-0.0070601	0.378661	0.153032	-0.0304814	0.097374	0.0610325	-0.0281862	0.0293649
ENSDARG00000097973	SI:CH1073-190K2.1	si:ch1073-190k2.1 [Source:ZFIN;Acc:ZDB-GENE-131127-449]	0.21925	0.356135	0.36659	0.00800196	0.278174	-0.00954651	0.26174	0.257915	0.0961271	0.374623	0.251706	0.217544	0.136016	-0.0999328	0.365081	-0.0670574
ENSDARG00000058332	KRT18	si:ch211-133j6.3 [Source:ZFIN;Acc:ZDB-GENE-090312-205]	-0.0554116	0.220886	0.368204	0.0753177	0.242032	-0.0274359	0.342641	0.420647	0.0282334	0.372986	0.166988	0.18219	0.30324	0.0824143	0.0134888	0.122738
ENSDARG00000032571	IL20RA	interleukin 20 receptor, alpha [Source:ZFIN;Acc:ZDB-GENE-040724-249]	0.0496737	0.260406	0.585504	0.188837	0.54373	0.144366	0.364798	0.498067	0.0678448	0.372527	-0.126028	0.0909813	0.276897	0.0850326	0.178366	0.0473391
ENSDARG00000037555	ATOH8	atonal bHLH transcription factor 8 [Source:ZFIN;Acc:ZDB-GENE-061215-7]	0.232404	0.336918	0.287314	0.243095	0.299902	0.416972	0.192614	0.312448	0.294668	0.371244	0.105162	0.243052	-0.0276715	0.168522	0.0776333	0.311364
ENSDARG00000096545	SI:CH211-191A16.5	si:ch211-191a16.5 [Source:ZFIN;Acc:ZDB-GENE-121214-56]	-0.00158507	0.778014	0.097594	0.116134	0.539501	0.110832	0.314903	0.133608	0.0343667	0.36875	0.123706	0.00572801	0.12747	-0.075101	0.0499227	0.236318
ENSDARG00000074393	SH3YL1	SH3 and SYLF domain containing 1 [Source:ZFIN;Acc:ZDB-GENE-040128-16]	-0.0356293	0.360653	0.195572	0.089053	0.45236	-0.0113907	0.324571	0.251665	-0.0873135	0.368283	0.135766	-0.0454785	0.234049	-0.0632241	0.241618	0.000353193
ENSDARG00000071024	ZGC:171679	zgc:171679 [Source:ZFIN;Acc:ZDB-GENE-071004-95]	-0.14997	0.0555983	0.168126	0.172271	0.0461245	0.0950421	0.263646	0.165161	0.210346	0.366918	0.17795	0.0903509	0.186968	0.182044	0.328568	0.0544993
ENSDARG00000063297	ABCB6A	ATP-binding cassette, sub-family B (MDR/TAP), member 6a [Source:ZFIN;Acc:ZDB-GENE-050517-9]	0.0328885	0.59213	0.204941	0.274726	0.406139	0.0400908	0.151874	0.278138	0.110729	0.366643	0.219882	-0.00869358	0.0455775	0.0354954	2.04e-05	0.0913907
ENSDARG00000015495	KLF3	Kruppel-like factor 3 (basic) [Source:ZFIN;Acc:ZDB-GENE-011116-1]	-0.0983868	0.209636	0.57633	-0.252416	0.280822	-0.344948	0.667883	0.430688	-0.135903	0.366329	-0.187257	0.15757	0.324441	0.138059	0.164912	-0.0381174
ENSDARG00000043802	MS4A17A.9	membrane-spanning 4-domains, subfamily A, member 17A.9 [Source:ZFIN;Acc:ZDB-GENE-050320-79]	0.147286	0.171877	0.143608	0.190174	0.302521	0.263675	0.109037	0.156016	0.219721	0.36631	0.13863	0.265248	0.242848	-0.0466999	0.220091	0.228953
ENSDARG00000091131	CRY1BB	cryptochrome circadian clock 1bb [Source:ZFIN;Acc:ZDB-GENE-010426-5]	-0.0155619	-0.0652398	0.122322	-0.0305696	0.0298986	-0.198011	0.393358	0.182701	-0.19396	0.366196	0.384692	-0.209363	0.0572862	-0.012678	0.398849	-0.0542341
ENSDARG00000093998	SI:CH73-7I4.2	si:ch73-7i4.2 [Source:ZFIN;Acc:ZDB-GENE-060810-137]	0.284316	-0.0961147	0.098316	0.153983	0.472447	0.0313352	0.323569	0.359346	0.0176161	0.365434	0.296531	-0.00650714	-0.00918537	-0.0635569	0.44083	0.0511857
ENSDARG00000078138	SI:CH211-202H22.8	si:ch211-202h22.8 [Source:ZFIN;Acc:ZDB-GENE-090313-78]	-0.210561	0.148103	0.17418	0.0821231	0.367379	0.0414015	0.159979	0.242074	-0.0173978	0.362949	-0.0995313	-0.0324937	-0.0417625	-0.0334829	0.118376	0.0360813
ENSDARG00000069282	BBC3	BCL2 binding component 3 [Source:ZFIN;Acc:ZDB-GENE-070119-4]	0.270418	0.282026	0.263991	0.297837	0.339065	0.358283	0.080026	0.0611138	0.170711	0.362162	0.056642	0.063565	0.106881	0.32598	-0.072521	0.202168
ENSDARG00000029075	PFKFB4B	6-phosphofructo-2-kinase/fructose-2,6-biphosphatase 4b [Source:ZFIN;Acc:ZDB-GENE-031031-4]	0.107661	-0.100072	0.339602	0.0400686	0.174073	-0.0463082	0.605168	0.275287	-0.0990872	0.360826	0.0511537	0.213453	0.385522	0.131906	0.168054	0.105583
ENSDARG00000032496	PON1	paraoxonase 1 [Source:ZFIN;Acc:ZDB-GENE-040912-6]	0.0861766	0.613228	0.296349	0.129096	0.351698	0.318235	0.0705186	0.162436	0.27992	0.360464	-0.0321868	0.105987	-0.0677338	0.0731593	0.0392802	-0.0286725
ENSDARG00000102849	FO681361.1	N/A	-0.0876123	0.118682	0.391227	0.0816556	0.0574372	0.147834	0.186884	0.437894	0.28308	0.360399	0.219554	0.0446663	0.274105	0.0223809	0.180384	0.128082
ENSDARG00000043243	PRKCHB	protein kinase C, eta, b [Source:ZFIN;Acc:ZDB-GENE-041001-104]	0.368882	0.594916	0.871698	0.356955	0.781685	0.0825925	0.609948	0.611148	0.296027	0.359891	0.217088	0.218916	0.425844	0.243772	0.409858	0.290829
ENSDARG00000089529	DESI1B	desumoylating isopeptidase 1b [Source:ZFIN;Acc:ZDB-GENE-040426-936]	-0.0310376	0.356617	0.256973	0.115308	0.19615	-0.104964	0.0470813	0.192632	0.00979694	0.358182	-0.0205711	0.0103131	-0.0499359	-0.0295448	-0.0927823	-0.0388245
ENSDARG00000069261	METAP2A	methionyl aminopeptidase 2a [Source:ZFIN;Acc:ZDB-GENE-061013-5]	-0.148314	0.15364	0.0965845	0.0204953	0.428149	-0.071226	0.324494	0.269833	0.0721973	0.357417	0.158293	0.0195073	0.25578	0.0983847	0.176286	0.109644
ENSDARG00000023082	KRT1-19D	keratin, type 1, gene 19d [Source:ZFIN;Acc:ZDB-GENE-060316-1]	-0.695693	0.191332	0.03178	-0.0480963	0.599297	-0.2286	0.52058	0.169517	-0.605608	0.357371	-0.435524	0.00244677	-0.0301094	0.101756	-0.315728	0.0270159
ENSDARG00000103019	GSTP2	glutathione S-transferase pi 2 [Source:ZFIN;Acc:ZDB-GENE-050601-1]	-0.0636954	1.56086	0.289305	0.0610903	0.537587	-0.0719853	0.310353	0.218481	0.0121887	0.354426	0.127589	0.0816846	0.243861	0.0185683	0.145725	0.0536424
ENSDARG00000089060	KCNJ1A.5	potassium inwardly-rectifying channel, subfamily J, member 1a, tandem duplicate 5 [Source:ZFIN;Acc:ZDB-GENE-050420-120]	0.103326	0.0896145	0.145948	-0.0324037	0.286383	0.0537908	0.0374643	0.0431083	-0.0524997	0.352898	0.201141	0.0617593	-0.0192859	0.149007	-0.168501	-0.142551
ENSDARG00000104474	IL6R	interleukin 6 receptor [Source:ZFIN;Acc:ZDB-GENE-080107-7]	-0.104314	0.592999	0.5439	-0.105279	0.23518	0.0218908	0.36409	0.41916	-0.0146156	0.352045	0.0634265	-0.00727454	-0.0573012	-0.0331282	-0.0734863	0.0620451
ENSDARG00000041947	STYK1	serine/threonine/tyrosine kinase 1 [Source:ZFIN;Acc:ZDB-GENE-030131-3435]	0.206288	0.481079	0.317618	0.213178	0.51682	0.248409	0.165448	0.338361	0.265677	0.352043	0.257764	0.0836157	0.0677913	0.0158533	0.174048	0.0766399
ENSDARG00000088408	SI:CH211-171H4.7	si:ch211-171h4.7 [Source:ZFIN;Acc:ZDB-GENE-120215-25]	-0.00858155	0.0300183	0.155244	-0.0429196	0.157722	0.027418	0.0251604	0.156161	0.118996	0.351668	0.075121	0.127185	0.0459555	0.276857	0.0261814	0.170673
ENSDARG00000101688	SI:DKEY-207L24.2	si:dkey-207l24.2 [Source:ZFIN;Acc:ZDB-GENE-131125-92]	0.143654	0.356366	0.236691	0.174476	0.264278	0.0279941	0.32067	0.282109	0.181673	0.351025	0.122986	0.00453461	0.324958	0.0713697	0.238206	0.0981826
ENSDARG00000104919	SI:CH211-153B23.3	si:ch211-153b23.3 [Source:ZFIN;Acc:ZDB-GENE-141216-408]	0.383787	0.0176326	0.0625417	-0.0377372	0.212527	0.501815	0.0828723	0.0845538	0.149103	0.349942	0.271344	0.0608137	0.275704	0.197126	0.032253	0.205423
ENSDARG00000002634	B4GALT1	UDP-Gal:betaGlcNAc beta 1,4- galactosyltransferase, polypeptide 1 [Source:ZFIN;Acc:ZDB-GENE-050417-236]	0.0467114	0.321742	0.224107	-0.087685	0.293211	0.122961	0.438145	0.273253	0.135125	0.348903	0.265161	0.0146514	0.173846	-0.0932706	0.407135	0.0168706
ENSDARG00000086947	SI:CH211-147M6.1	si:ch211-147m6.1 [Source:ZFIN;Acc:ZDB-GENE-131120-57]	0.506634	0.498958	0.159658	-0.0681521	0.369708	0.43892	0.229459	0.286498	0.229415	0.344711	0.575459	0.0550831	0.301883	0.240875	0.370501	0.323853
ENSDARG00000103038	PIK3R3A	phosphoinositide-3-kinase, regulatory subunit 3a (gamma) [Source:ZFIN;Acc:ZDB-GENE-040426-1978]	-0.0439198	-0.0715693	0.30494	-0.0502723	0.188196	-0.0943448	0.493999	0.206814	-0.159612	0.343742	-0.104047	0.0180975	0.431564	0.128032	0.201908	-0.08567
ENSDARG00000101910	PCDH20	protocadherin 20 [Source:ZFIN;Acc:ZDB-GENE-091204-115]	-0.0101157	0.152672	0.350591	-0.0857968	0.358908	0.0722701	0.309812	0.405694	0.0102776	0.342682	-0.0695545	0.0136482	0.0805159	-0.120259	0.106711	-0.00249162
ENSDARG00000028367	SULT2ST3	sulfotransferase family 2, cytosolic sulfotransferase 3 [Source:ZFIN;Acc:ZDB-GENE-061117-4]	-0.0368427	0.531633	0.537523	0.254507	0.18665	0.0952665	0.189173	0.298445	0.0930693	0.341326	0.324476	0.228733	-0.0475966	0.0211807	0.0951608	0.253325
ENSDARG00000053136	B2M	beta-2-microglobulin [Source:ZFIN;Acc:ZDB-GENE-980526-88]	0.37809	0.334509	0.226517	0.0820736	0.215026	0.29553	0.219404	0.277297	0.124532	0.340291	0.106706	0.0567085	0.150918	0.0186456	0.0705534	0.210298
ENSDARG00000044002	CYP2X7	cytochrome P450, family 2, subfamily X, polypeptide 7 [Source:ZFIN;Acc:ZDB-GENE-110114-2]	0.00354705	0.0499104	0.312162	0.123373	0.116138	0.337748	0.20038	0.178831	0.200813	0.340014	0.183638	-0.0408237	0.414551	0.19583	0.212412	0.194162
ENSDARG00000044691	PPP1R3B	protein phosphatase 1, regulatory subunit 3B [Source:ZFIN;Acc:ZDB-GENE-030131-5496]	0.064381	-0.142676	0.253885	0.0984667	0.145236	0.138724	0.312912	0.167991	0.120351	0.339725	0.0675158	-0.0259705	0.27727	0.00388257	0.302955	0.00851849
ENSDARG00000099902	IL17RC	interleukin 17 receptor C [Source:ZFIN;Acc:ZDB-GENE-120111-3]	-0.00746563	0.277321	0.565665	0.00193475	0.518741	0.0154919	0.292813	0.335911	0.0184346	0.338655	-0.0866695	0.0756648	-0.0163309	-0.0142829	0.0326246	-0.102535
ENSDARG00000101816	COL5A3B	collagen, type V, alpha 3b [Source:ZFIN;Acc:ZDB-GENE-110728-4]	0.115961	0.415885	0.320228	0.117343	0.441701	0.197374	0.363468	0.387419	0.0426783	0.338368	0.0468068	0.0678238	0.0922482	-0.0720735	0.148809	0.173882
ENSDARG00000070597	PRELP	proline/arginine-rich end leucine-rich repeat protein [Source:ZFIN;Acc:ZDB-GENE-080327-24]	-0.227977	-0.0502377	0.383943	-0.0608248	0.233987	-0.153287	0.393817	0.112789	-0.133426	0.334814	-0.000473327	0.0788229	0.259596	0.152637	-0.00708113	0.0531492
ENSDARG00000062788	IRG1L	immunoresponsive gene 1, like [Source:ZFIN;Acc:ZDB-GENE-061103-301]	0.510697	-0.0400337	0.265698	-0.0535065	0.228298	0.362434	0.197993	0.13894	0.149541	0.334224	0.367205	0.0980378	0.161152	0.143647	0.209926	0.231159
ENSDARG00000100969	TMPRSS13A	transmembrane protease, serine 13a [Source:ZFIN;Acc:ZDB-GENE-090309-3]	0.0205958	0.479591	0.21433	0.090214	0.387491	0.0241696	0.200229	0.124041	-0.0564791	0.333613	-0.0316625	-0.125936	0.00843589	-0.113032	-0.0901517	0.0846148
ENSDARG00000054846	CU657980.1	N/A	-0.00506157	0.0181825	0.157926	0.203246	0.282256	0.226922	0.251226	0.284715	-0.126525	0.333128	0.339193	0.166476	0.289912	0.0166257	0.256945	0.242901
ENSDARG00000100213	CR388052.3	N/A	0.0844981	0.213358	0.302533	-0.0082296	0.190221	-0.0823349	0.195689	0.213398	0.00929243	0.332543	0.242432	0.0034463	0.364407	0.132554	0.312355	-0.214401
ENSDARG00000077907	SI:DKEY-183P4.10	si:dkey-183p4.10 [Source:ZFIN;Acc:ZDB-GENE-081104-337]	-0.0344369	0.235425	0.178419	0.106355	0.278094	0.0589531	0.149449	0.254846	0.219872	0.33147	0.0383139	0.258948	0.167442	0.281097	0.0229443	0.119396
ENSDARG00000069998	SI:CH211-145B13.6	si:ch211-145b13.6 [Source:ZFIN;Acc:ZDB-GENE-090313-36]	0.206609	0.46593	0.334936	0.173523	0.263791	0.546647	0.244732	0.220671	0.263993	0.330269	0.111429	0.161302	0.14149	0.364773	0.557726	0.288403
ENSDARG00000093584	ZGC:193505	zgc:193505 [Source:ZFIN;Acc:ZDB-GENE-030131-7103]	-0.0334035	0.661641	0.031555	0.047139	0.641834	-0.0793023	0.388149	0.532969	-0.0687802	0.33025	-0.00627386	0.0651861	0.172954	0.00829934	0.0212353	0.0547255
ENSDARG00000074749	ABCA12	ATP-binding cassette, sub-family A (ABC1), member 12 [Source:ZFIN;Acc:ZDB-GENE-030131-9790]	0.204958	0.361026	0.352074	0.259247	0.369002	0.0726455	0.292845	0.422228	0.128069	0.329513	0.267521	0.11781	0.157491	-0.0412839	0.263919	0.166153
ENSDARG00000100052	CCK	cholecystokinin [Source:HGNC Symbol;Acc:HGNC:1569]	0.208997	0.417702	0.506121	0.151734	0.632089	0.454926	0.262027	0.334213	0.0792479	0.328855	0.119991	-0.121969	0.0139461	-0.0450573	-0.00844274	0.0580084
ENSDARG00000091996	SI:CH211-117M20.5	si:ch211-117m20.5 [Source:ZFIN;Acc:ZDB-GENE-030131-12]	0.0834563	0.432478	0.131724	0.161257	0.630096	-0.0495119	0.508149	0.358652	0.318423	0.326715	0.221248	0.140137	0.0476621	0.0558711	-0.0507986	0.118573
ENSDARG00000076448	SERPINF2A	serpin peptidase inhibitor, clade F (alpha-2 antiplasmin, pigment epithelium derived factor), member 2a [Source:ZFIN;Acc:ZDB-GENE-060822-1]	-0.233093	-0.142258	0.227252	-0.0280086	-0.0190068	-0.210277	0.199978	0.068415	-0.10329	0.324937	-0.0596759	-0.0558167	0.0171796	0.169826	-0.208365	-0.0303682
ENSDARG00000099960	ELOVL1A	ELOVL fatty acid elongase 1a [Source:ZFIN;Acc:ZDB-GENE-041010-66]	0.221651	0.100258	0.221241	-0.0908248	0.127825	-0.339475	0.385735	0.189307	-0.0704624	0.324219	0.115827	0.0478974	0.130917	0.0764741	0.212926	0.0136082
ENSDARG00000088595	CRISPLD2	cysteine-rich secretory protein LCCL domain containing 2 [Source:ZFIN;Acc:ZDB-GENE-130131-1]	-0.0534096	0.559459	0.512767	0.0274897	0.435495	-0.160109	0.410718	0.260062	-0.0513323	0.323157	0.0489761	0.0240514	0.190749	0.0367136	0.0572232	-0.114196
ENSDARG00000074752	HLFA	hepatic leukemia factor a [Source:ZFIN;Acc:ZDB-GENE-061013-159]	0.0739818	0.360815	0.591454	0.102514	0.388969	-0.00385277	0.592607	0.43915	-0.0590963	0.321942	0.0702418	0.129512	0.0922062	0.179858	0.174871	0.150666
ENSDARG00000097513	CT573383.1	N/A	0.375029	0.46671	0.145031	0.457558	0.287677	0.355421	0.386299	0.393543	0.432915	0.321667	0.467306	0.304479	0.466965	0.176583	0.434213	0.180233
ENSDARG00000088915	SI:CH211-241N15.3	si:ch211-241n15.3 [Source:ZFIN;Acc:ZDB-GENE-110913-169]	0.155478	0.276334	0.0642838	0.0243598	0.0742069	0.140992	0.162764	0.187113	0.187817	0.321453	0.142624	0.0756117	0.220812	0.140497	0.211522	-0.0170908
ENSDARG00000101012	CABZ01051600.1	N/A	0.0368322	0.455767	0.795207	0.0594114	0.544881	0.0146754	0.209565	0.206965	0.201024	0.32073	0.0961892	0.0185883	0.0889666	0.028586	0.0532936	0.152836
ENSDARG00000010047	NEU3.2	sialidase 3 (membrane sialidase), tandem duplicate 2 [Source:ZFIN;Acc:ZDB-GENE-040801-262]	0.144374	0.212547	0.319137	0.165824	0.247914	-0.0240712	0.265091	0.192962	-0.0310276	0.320581	0.182106	-0.0125527	0.170903	0.0519332	0.227848	0.0361716
ENSDARG00000107600	CABZ01015530.2	N/A	0.255348	0.207095	0.444787	0.27411	0.21385	0.207802	0.456731	0.210435	0.33509	0.32031	0.452704	0.318662	0.345985	0.42598	0.354663	0.302301
ENSDARG00000032929	CRYBA1L1	crystallin, beta A1, like 1 [Source:ZFIN;Acc:ZDB-GENE-050417-249]	-0.0833139	0.111617	0.0938658	-0.00570306	0.31192	0.150224	0.219562	0.291242	0.187809	0.319245	0.0744304	0.150136	0.153227	-0.00567686	0.27334	0.0139946
ENSDARG00000053934	HDHD3	haloacid dehalogenase-like hydrolase domain containing 3 [Source:ZFIN;Acc:ZDB-GENE-040724-118]	0.137464	0.33026	0.375405	0.32086	0.278803	0.0696287	0.24417	0.253791	0.111719	0.31689	0.189945	0.223435	0.224467	0.326912	0.0856564	0.117988
ENSDARG00000057437	APODB	apolipoprotein Db [Source:ZFIN;Acc:ZDB-GENE-051023-8]	0.25317	0.238823	0.195488	-0.207068	0.150299	0.362929	0.255012	0.258189	0.230349	0.315422	0.427972	-0.0812189	0.0440336	-0.045432	0.226285	-0.0223705
ENSDARG00000059811	SMPD5	sphingomyelin phosphodiesterase 5 [Source:ZFIN;Acc:ZDB-GENE-061110-22]	-0.0571323	0.461551	0.136506	0.0438899	0.344312	-0.152711	0.154636	0.253968	-0.071627	0.314625	0.193157	0.0574028	0.200631	-0.00124843	-0.024026	0.112303
ENSDARG00000010940	BX957278.1	N/A	0.129571	0.707075	0.108087	-0.00392614	0.379838	0.135711	0.0936681	0.177411	0.321605	0.313638	0.0406085	-0.0680656	0.00548993	2.18e-05	0.0402317	0.0653689
ENSDARG00000103398	FABP1B.2	fatty acid binding protein 1b, liver, tandem duplicate 2 [Source:ZFIN;Acc:ZDB-GENE-100318-6]	0.0323668	0.732093	0.12079	0.0243396	0.123706	0.261739	0.23287	0.202559	0.245617	0.311311	0.353281	0.0603402	0.332504	0.169373	0.135704	0.206969
ENSDARG00000026820	GC3	guanylyl cyclase 3 [Source:ZFIN;Acc:ZDB-GENE-011128-9]	0.0978361	0.298505	0.210836	0.141043	0.213458	0.125633	0.12892	0.315394	0.269066	0.31099	0.137296	0.247047	0.302357	0.173734	0.140966	0.0706244
ENSDARG00000098306	SI:DKEY-82I20.1	si:dkey-82i20.1 [Source:ZFIN;Acc:ZDB-GENE-081104-500]	0.0939756	0.52366	0.301755	0.208831	0.394099	0.238808	0.298041	0.314052	0.13359	0.310823	0.0981447	0.0785444	0.283779	0.0545967	0.219323	0.161507
ENSDARG00000091013	SI:DKEY-84H14.2	si:dkey-84h14.2 [Source:ZFIN;Acc:ZDB-GENE-110913-33]	0.216868	0.397344	0.108023	0.12447	0.0754988	0.025699	0.16599	0.149621	0.0983393	0.310296	0.0823618	-0.0534477	0.121659	-0.102562	0.0996577	-0.0443034
ENSDARG00000105241	BTR26	bloodthirsty-related gene family, member 26 [Source:ZFIN;Acc:ZDB-GENE-070705-378]	0.209235	0.0246382	0.18708	0.0985048	0.461111	0.203627	0.212165	0.178903	0.0289661	0.308976	0.1598	0.116631	0.359534	0.248238	0.162505	0.253657
ENSDARG00000006202	ERBB3A	erb-b2 receptor tyrosine kinase 3a [Source:ZFIN;Acc:ZDB-GENE-030916-3]	-0.128696	0.0011788	0.106378	0.0809797	0.238525	-0.0583064	0.226452	0.261193	-0.163117	0.308289	0.0953552	0.129104	0.183639	0.0142862	0.195273	0.0658882
ENSDARG00000042189	TSPAN33B	tetraspanin 33b [Source:ZFIN;Acc:ZDB-GENE-060503-607]	-0.0201805	0.152642	0.0963547	0.0950735	0.154038	0.0724424	0.139014	0.167751	-0.146622	0.308217	-0.000109359	0.0513627	0.0583146	0.0814811	0.216121	0.142486
ENSDARG00000087651	SI:DKEY-26G8.4	si:dkey-26g8.4 [Source:ZFIN;Acc:ZDB-GENE-121214-36]	0.183806	0.220617	0.0599057	0.15282	0.19219	0.378738	-0.0252584	0.142612	0.298631	0.307636	0.290124	0.150091	0.0923375	0.215679	0.197682	0.000243526
ENSDARG00000002197	PYGL	phosphorylase, glycogen, liver [Source:ZFIN;Acc:ZDB-GENE-041205-1]	0.104927	0.51336	0.571149	0.130312	0.763198	-0.0465552	0.197103	0.416844	0.0969166	0.307054	0.330277	-0.0266525	0.104575	0.124098	0.136267	0.0493064
ENSDARG00000032631	LTB4R	leukotriene B4 receptor [Source:ZFIN;Acc:ZDB-GENE-070705-164]	0.321368	0.385411	0.134543	0.101648	0.222698	0.0883879	0.399455	0.158184	0.121613	0.306479	0.209673	0.0842906	0.0524897	0.212661	0.0726412	0.095143
ENSDARG00000098103	TEFB	thyrotrophic embryonic factor b [Source:ZFIN;Acc:ZDB-GENE-050522-224]	-0.198418	0.168081	0.267012	-0.0811724	0.122157	-0.203662	0.532155	0.0879438	-0.0684992	0.306466	0.0669082	0.0887399	0.333909	0.102506	0.303952	0.104409
ENSDARG00000068507	CRYBB1	crystallin, beta B1 [Source:ZFIN;Acc:ZDB-GENE-010813-1]	-0.0527311	0.069806	0.20057	0.00148081	0.415079	0.10166	0.172279	0.242378	0.140897	0.306444	0.247817	0.205352	0.249209	0.129779	0.149962	0.0747599
ENSDARG00000095369	ZGC:112966	zgc:112966 [Source:ZFIN;Acc:ZDB-GENE-050320-137]	0.0441764	0.190545	0.0918266	0.191392	0.038734	0.0965625	0.168046	0.00232147	0.159441	0.305925	-0.0409191	0.0451845	0.128243	-0.0454435	0.375274	0.084514
ENSDARG00000003381	SI:CH211-266G18.6	si:ch211-266g18.6 [Source:ZFIN;Acc:ZDB-GENE-131121-599]	0.107277	0.490969	0.525234	0.194823	0.452661	0.2553	0.319132	0.283694	0.165269	0.305631	0.314789	0.177827	0.139346	0.35311	0.00901212	0.261708
ENSDARG00000029848	ZGC:161973	zgc:161973 [Source:ZFIN;Acc:ZDB-GENE-070410-13]	-0.00541433	0.0805348	0.111784	0.00100921	-0.0693963	0.24956	0.288771	-0.0566031	0.0490944	0.305162	-0.00664191	-0.0321533	0.111269	-0.134449	-0.0110031	0.0878311
ENSDARG00000036912	EDN1	endothelin 1 [Source:ZFIN;Acc:ZDB-GENE-000920-1]	0.0518875	0.274331	0.233382	0.0252658	0.395097	0.0583088	0.118639	0.0822212	0.373235	0.305149	-0.113829	0.35128	-0.208526	0.404337	-0.316381	0.210437
ENSDARG00000104108	SLCO1D1	solute carrier organic anion transporter family, member 1D1 [Source:ZFIN;Acc:ZDB-GENE-030131-5044]	-0.0960463	0.313601	0.561458	-0.0979388	0.47284	0.0245312	0.452416	0.417646	0.176939	0.303423	0.175823	0.10389	0.131073	0.128293	0.167232	0.0871807
ENSDARG00000100471	CT573263.3	N/A	0.118136	0.45949	0.150041	0.0316381	0.192647	0.105922	0.159767	0.250196	0.0880603	0.301458	0.0934161	0.111277	0.176078	-0.017779	0.35705	-0.0850343
ENSDARG00000014626	DLX3B	distal-less homeobox 3b [Source:ZFIN;Acc:ZDB-GENE-980526-280]	0.158538	0.407353	0.629817	0.102727	0.635434	0.26124	0.265999	0.35548	0.256905	0.300406	0.0724262	0.21118	0.0377185	0.0150111	0.0489831	0.018386
ENSDARG00000076667	CCNG1	cyclin G1 [Source:ZFIN;Acc:ZDB-GENE-020322-1]	0.142371	-0.0164574	0.0103121	0.0546916	-0.106184	0.176498	-0.0449704	0.0434016	0.164752	0.300297	-0.135475	-0.00270541	0.105303	0.15955	0.0377636	-0.0851242
ENSDARG00000029995	TNNI2B.2	troponin I type 2b (skeletal, fast), tandem duplicate 2 [Source:ZFIN;Acc:ZDB-GENE-040801-9]	-0.239903	0.241269	0.147153	-0.00153206	0.30379	0.00531049	0.277254	0.326153	-0.0225462	0.299269	-0.0228808	0.138602	-0.103414	0.0181017	0.0192107	-0.0121953
ENSDARG00000045733	CIAPIN1	cytokine induced apoptosis inhibitor 1 [Source:ZFIN;Acc:ZDB-GENE-040808-57]	0.13316	0.414792	0.105716	0.172075	0.529205	0.227908	0.144789	0.185062	0.359904	0.297565	0.0831517	0.122327	0.0609755	-0.0365417	0.0566513	0.055661
ENSDARG00000097480	SI:DKEY-263J23.1	si:dkey-263j23.1 [Source:ZFIN;Acc:ZDB-GENE-131120-109]	0.0950724	0.244454	0.197475	0.252023	0.424055	0.0828461	0.279448	0.0671616	0.229567	0.294141	0.0198734	0.0820628	0.228054	0.104353	0.0563557	0.280179
ENSDARG00000025757	TSPAN35	tetraspanin 35 [Source:ZFIN;Acc:ZDB-GENE-040426-1362]	-0.0427781	0.318151	0.497116	-0.0246878	0.372278	0.132477	0.296144	0.432552	-0.0105288	0.293816	-0.0207384	0.00560434	-0.0227937	-0.00497819	0.0172797	-0.0916299
ENSDARG00000061049	RNF182	ring finger protein 182 [Source:ZFIN;Acc:ZDB-GENE-060825-49]	-0.254365	-0.0484172	0.0360807	0.0789795	0.101183	-0.28024	0.0900759	0.125413	-0.175533	0.291533	-0.104582	0.207944	0.10122	-0.0150682	-0.115753	-0.0202245
ENSDARG00000088717	ECRG4B	esophageal cancer related gene 4b [Source:ZFIN;Acc:ZDB-GENE-110324-2]	-0.200009	0.245163	0.0757173	0.193872	0.285451	0.213299	0.173303	0.318275	0.136001	0.291477	0.216666	-0.113318	0.223887	0.197665	0.046554	-0.0816541
ENSDARG00000094554	SI:CH73-7I4.1	si:ch73-7i4.1 [Source:ZFIN;Acc:ZDB-GENE-100921-19]	0.103421	-0.0601042	0.0256076	0.0244939	0.106974	0.0322691	0.0922936	0.0959618	0.02392	0.288842	-0.0328114	-0.0121386	0.00959368	-0.0490446	0.148269	-0.0412055
ENSDARG00000023820	FAXDC2	fatty acid hydroxylase domain containing 2 [Source:ZFIN;Acc:ZDB-GENE-040426-2907]	-0.236793	0.393921	0.203074	0.122656	0.135317	-0.299585	0.00468652	0.150847	-0.127265	0.288268	0.0116384	0.112822	0.0958553	-0.117659	-0.18126	-0.0344503
ENSDARG00000092364	SI:CH211-218C6.8	si:ch211-218c6.8 [Source:ZFIN;Acc:ZDB-GENE-050419-103]	0.214983	0.446992	0.200602	0.113988	0.276356	0.15286	0.257535	0.280594	0.374768	0.287975	0.0685662	0.241101	0.303202	0.0692927	0.180449	0.254101
ENSDARG00000105270	CABZ01080198.1	N/A	0.0150311	-0.0234186	0.048932	0.0410072	0.120536	-0.0806941	0.115022	-0.0129664	-0.155237	0.28672	0.0564269	-0.0435471	0.0751725	-0.0432492	0.0208579	-0.143615
ENSDARG00000076361	B4GALNT2	beta-1,4-N-acetyl-galactosaminyltransferase 2 [Source:HGNC Symbol;Acc:HGNC:24136]	0.336551	0.489825	0.0572562	-0.0661635	0.349293	0.213767	0.163268	0.380897	0.0489584	0.28652	0.15165	-0.0398125	0.48164	0.0623237	0.318462	0.020444
ENSDARG00000028071	BMP1A	bone morphogenetic protein 1a [Source:ZFIN;Acc:ZDB-GENE-060818-1]	-0.0634648	0.427116	0.32608	0.0315557	0.540957	0.0132391	0.244355	0.302501	0.0392509	0.285762	0.207168	0.0549778	0.0537643	-0.0170112	0.10697	0.137426
ENSDARG00000007576	CRYBB1L1	crystallin, beta B1, like 1 [Source:ZFIN;Acc:ZDB-GENE-100112-3]	-0.144865	0.0270382	0.113923	-0.051109	0.138241	-0.0830112	0.0982179	0.204764	-0.0453805	0.285432	0.0625452	0.159778	0.261237	-0.00521199	0.0828793	-0.103985
ENSDARG00000096186	SI:DKEY-247I3.5	si:dkey-247i3.5 [Source:ZFIN;Acc:ZDB-GENE-110914-32]	0.353979	0.213197	0.326139	0.150564	0.0960468	0.00147547	0.269176	0.0858385	0.253189	0.284918	0.161955	-0.0259572	0.193634	-0.0110657	0.241046	0.0860175
ENSDARG00000035559	TP53	tumor protein p53 [Source:ZFIN;Acc:ZDB-GENE-990415-270]	0.390188	0.00240164	0.00375143	0.0873574	-0.0193554	0.281104	-0.0168131	0.0362249	0.173194	0.284664	0.0185892	0.00900775	0.247428	0.238673	0.0369546	0.0146829
ENSDARG00000096603	BMB	brambleberry [Source:ZFIN;Acc:ZDB-GENE-030131-5577]	0.144226	-0.0370359	-0.115983	0.032224	-0.0942971	0.160263	-0.042943	-0.00928792	0.0906896	0.284186	0.0603014	0.0598648	0.238172	0.102418	-0.00488892	-0.029089
ENSDARG00000105653	BX323797.4	N/A	-0.041674	0.124708	0.198352	-0.0231393	-0.0273484	0.074122	0.147452	0.139909	0.00597254	0.283156	0.0463354	0.0822299	0.0957353	0.0618649	0.0376386	0.103837
ENSDARG00000003820	NR1D2A	nuclear receptor subfamily 1, group D, member 2a [Source:ZFIN;Acc:ZDB-GENE-040504-1]	-0.273486	0.0515164	0.429851	-0.454238	0.106077	-0.565262	0.585054	0.349308	-0.400716	0.28301	-0.174794	0.113937	0.258381	0.0923881	0.158452	-0.0319023
ENSDARG00000022689	ITGB1B.2	integrin, beta 1b.2 [Source:ZFIN;Acc:ZDB-GENE-040426-2598]	0.198919	0.214273	-0.113166	0.021056	0.0252992	0.123152	0.119328	0.181305	-0.19237	0.282967	0.0211492	-0.11537	0.29943	-0.0124632	0.113201	0.0482653
ENSDARG00000103580	TWSG1	twisted gastrulation BMP signaling modulator 1 [Source:HGNC Symbol;Acc:HGNC:12429]	0.332575	0.161579	-0.0548888	0.384094	0.0855228	0.511802	-0.117177	0.0957527	0.344712	0.282561	0.371386	0.131731	0.296142	0.000887736	0.107081	0.122869
ENSDARG00000024548	CRYBA4	crystallin, beta A4 [Source:ZFIN;Acc:ZDB-GENE-050522-143]	-0.169305	0.110628	0.147858	-0.0280798	0.24312	0.0280407	0.190754	0.208719	0.204843	0.282507	0.153276	0.0751557	0.238693	0.00936731	0.130294	0.0187175
ENSDARG00000042094	EEF2A.1	eukaryotic translation elongation factor 2a, tandem duplicate 1 [Source:ZFIN;Acc:ZDB-GENE-050522-500]	0.271872	0.135667	0.139947	0.0517509	0.11613	0.194504	0.194226	0.20172	0.147239	0.282016	0.237136	0.0917382	0.233582	-0.0169337	0.471777	0.0922614
ENSDARG00000089205	SI:DKEY-73N8.3	si:dkey-73n8.3 [Source:ZFIN;Acc:ZDB-GENE-141219-27]	0.222519	0.477536	0.292597	0.0378566	0.261426	0.36038	0.0903085	0.00977665	0.216458	0.281389	0.0808069	0.0479623	0.0508801	0.0455407	0.0371295	0.087452
ENSDARG00000092106	SI:CH211-214P13.8	si:ch211-214p13.8 [Source:ZFIN;Acc:ZDB-GENE-060503-120]	0.192731	0.0873092	0.208405	0.0314833	0.0631508	0.284283	0.17853	0.296196	0.208769	0.281339	0.0392912	0.152061	0.15082	0.034512	0.270077	-0.0473746
ENSDARG00000077746	AL935199.1	N/A	0.0447608	0.0712052	0.235987	0.124185	0.0728114	0.0614435	0.169551	0.138984	-0.0382646	0.278509	0.0129807	0.122059	0.164076	0.0753292	0.0902527	0.090457
ENSDARG00000102777	THBS4A	thrombospondin 4a [Source:ZFIN;Acc:ZDB-GENE-080215-11]	-0.158495	0.25339	0.0403512	0.0603262	0.112449	0.0942138	0.291005	0.250389	-0.200199	0.278327	0.121124	0.0159759	0.23912	0.0207384	0.00604839	-0.0167386
ENSDARG00000039173	CTSLB	cathepsin Lb [Source:ZFIN;Acc:ZDB-GENE-980526-285]	0.465124	0.184664	-0.223859	0.0569446	-0.0409819	0.443437	-0.0530074	-0.0487424	0.152594	0.27812	0.126411	-0.166705	0.0951591	0.0683421	0.24608	-0.0636932
ENSDARG00000098567	SI:CH1073-286C18.5	si:ch1073-286c18.5 [Source:ZFIN;Acc:ZDB-GENE-121214-240]	0.0933663	0.356147	0.221247	0.0271393	0.222808	0.139946	0.345098	0.355967	0.0378798	0.277302	-5.59e-05	0.0748351	-0.0586316	-0.156343	0.156496	0.0589618
ENSDARG00000021059	ALAS1	aminolevulinate, delta-, synthase 1 [Source:ZFIN;Acc:ZDB-GENE-001229-2]	-0.107419	0.442107	0.212947	-0.11103	0.467295	0.133908	0.230897	0.310699	0.0303054	0.277224	0.194408	0.00386829	0.00930134	-0.0671552	0.0954667	0.109292
ENSDARG00000076398	SI:DKEY-201L21.4	si:dkey-201l21.4 [Source:ZFIN;Acc:ZDB-GENE-060531-98]	0.00360017	0.447566	0.432011	0.0589638	0.287693	0.207896	0.228356	0.388203	0.19081	0.27658	0.215113	0.0921843	0.228104	0.0928752	0.244509	0.162373
ENSDARG00000098447	BX321873.1	N/A	0.127466	0.0884523	0.125151	0.218119	-0.00126064	0.0959506	0.0860291	0.140557	0.176538	0.274353	0.149104	0.109222	0.0437844	0.164843	0.0308766	0.138125
ENSDARG00000099506	CABZ01028770.1	N/A	0.157891	0.290749	0.24647	0.074538	0.178761	0.146708	0.310097	0.267985	0.238903	0.274066	0.164946	-0.0025817	0.328327	0.0275532	0.333418	0.174488
ENSDARG00000042988	SLC24A2	solute carrier family 24 (sodium/potassium/calcium exchanger), member 2 [Source:ZFIN;Acc:ZDB-GENE-060825-277]	-0.0418599	0.144537	0.246099	0.227242	0.122007	0.180865	0.22285	0.193322	0.177213	0.273405	0.146664	0.190274	0.0957177	0.15718	0.242646	0.0628864
ENSDARG00000043781	PSMB10	proteasome subunit beta 10 [Source:ZFIN;Acc:ZDB-GENE-040718-278]	0.182846	0.272994	0.242281	-0.0502159	0.333809	0.106745	0.22207	0.133687	0.181176	0.273237	0.203081	0.234334	0.244325	0.180496	0.295079	0.155784
ENSDARG00000096000	SI:DKEY-29J8.2	si:dkey-29j8.2 [Source:ZFIN;Acc:ZDB-GENE-110913-58]	0.000589575	0.174456	0.133658	-0.128048	0.054804	0.0591291	0.241529	0.162356	0.147714	0.272973	0.119931	-0.0144754	0.134197	-0.0936089	0.138129	-0.0726497
ENSDARG00000037804	PHLDA3	pleckstrin homology-like domain, family A, member 3 [Source:ZFIN;Acc:ZDB-GENE-030616-267]	0.122961	-0.0531516	-0.0919349	-0.0199274	0.072972	0.204863	0.0219051	-0.0238938	0.0298997	0.272935	0.0234023	0.040535	0.122979	0.0571879	0.0960938	-0.0602706
ENSDARG00000067872	CU469531.1	N/A	0.0492622	0.230295	0.0914901	0.13265	0.100717	0.077609	0.171154	0.25996	0.156007	0.272673	0.217742	0.0513185	0.127477	0.0784118	0.104716	0.0833628
ENSDARG00000092283	CXL34B.11	CX chemokine ligand 34b, duplicate 11 [Source:ZFIN;Acc:ZDB-GENE-091204-33]	-0.0531759	-0.187398	-0.0174125	0.0714237	0.135003	0.284014	0.117773	-0.0808631	-0.0471357	0.272226	0.0905566	0.0872444	0.0190778	0.177479	-0.141975	0.160522
ENSDARG00000092623	BX322665.1	N/A	0.114386	0.122134	0.155998	0.0965724	0.0733539	-0.0186557	0.0912317	-0.00582539	-0.0132295	0.271089	0.149514	0.11347	0.000861347	0.102539	0.10677	-0.0472559
ENSDARG00000102558	PDE6H	phosphodiesterase 6H, cGMP-specific, cone, gamma [Source:ZFIN;Acc:ZDB-GENE-040426-1754]	-0.198856	0.190832	0.922045	0.0357867	0.603907	-0.0851026	0.696755	0.468271	-0.00147628	0.270185	-0.089753	-0.0993464	0.00195471	0.0278711	-0.0585991	0.0429931
ENSDARG00000041864	CAPN3A	calpain 3a, (p94) [Source:ZFIN;Acc:ZDB-GENE-040912-97]	-0.0775076	0.07496	0.15539	0.0655281	0.284284	0.121753	0.159721	0.21743	0.0851977	0.270151	0.0902089	0.152775	0.146494	0.103324	0.139358	0.0151602
ENSDARG00000039393	SI:CH211-240L19.5	si:ch211-240l19.5 [Source:ZFIN;Acc:ZDB-GENE-041210-327]	0.119114	0.178499	0.168489	0.197811	0.17497	0.196457	0.247565	0.171203	0.337271	0.268411	0.224877	0.0661069	0.0772961	0.283022	0.0634803	0.218914
ENSDARG00000079456	SI:CH211-149A19.3	si:ch211-149a19.3 [Source:ZFIN;Acc:ZDB-GENE-081104-128]	0.154175	0.32302	0.146106	0.0394601	0.213985	0.0191696	0.249226	0.326727	-0.0403797	0.268405	-0.0628944	-0.0151494	0.251923	-0.0311234	0.139212	0.0922985
ENSDARG00000100954	WARS	tryptophanyl-tRNA synthetase [Source:ZFIN;Acc:ZDB-GENE-040426-1742]	0.226188	0.215722	0.154355	0.189409	0.475024	0.226215	0.26576	0.339713	0.19833	0.268346	0.408693	0.0793043	0.271629	-0.00355753	0.265154	0.0566877
ENSDARG00000103844	SI:CH211-266C8.1	si:ch211-266c8.1 [Source:ZFIN;Acc:ZDB-GENE-070424-173]	0.0807666	0.312383	0.0984488	0.0337037	0.0606466	0.0597107	0.0807301	-0.0194266	-0.0847899	0.267667	0.0885945	-0.00987901	0.211964	0.0372959	0.167648	-0.029396
ENSDARG00000010250	NQO1	NAD(P)H dehydrogenase, quinone 1 [Source:ZFIN;Acc:ZDB-GENE-030131-1226]	-0.0737723	0.328583	0.245862	-0.0912294	0.367719	0.0158148	0.148831	0.240701	0.164317	0.267598	-0.0353531	0.0776175	0.148747	-0.0257796	0.0242506	0.0168369
ENSDARG00000042069	PEBP1	phosphatidylethanolamine binding protein 1 [Source:ZFIN;Acc:ZDB-GENE-040426-2621]	-0.0381616	0.0433836	0.166896	-0.112656	0.0745692	-0.0169205	0.0893573	0.0266392	0.139084	0.26655	-0.219664	-0.124542	0.198535	-0.0564294	0.175697	-0.0649407
ENSDARG00000069675	HER8.2	hairy-related 8.2 [Source:ZFIN;Acc:ZDB-GENE-060815-4]	0.177213	0.259715	0.0863482	-0.07709	0.237446	-0.0873917	0.236323	-0.117312	0.0735983	0.265816	0.101423	0.140105	-0.0771067	-0.0768058	0.156351	-0.0481898
ENSDARG00000060671	LCT	lactase [Source:ZFIN;Acc:ZDB-GENE-081104-434]	-0.0136102	-0.0879071	0.0361983	-0.0445566	0.0652809	-0.0330839	0.0818869	0.105321	-0.0331098	0.26478	0.0209912	-0.0288022	-0.0307344	-0.0348202	-0.0146685	-0.117021
ENSDARG00000096678	SI:DKEY-263J23.1	si:dkey-263j23.1 [Source:ZFIN;Acc:ZDB-GENE-131120-109]	0.0329368	0.149363	0.20454	0.195739	0.206982	0.362117	0.148517	0.112916	0.272351	0.263714	-0.0276609	0.245424	0.132797	0.0396409	0.119681	0.075833
ENSDARG00000032836	PVALB5	parvalbumin 5 [Source:ZFIN;Acc:ZDB-GENE-050417-336]	-0.0674477	0.119789	0.184746	0.159656	0.303732	0.21982	0.357435	0.307573	0.0147572	0.263059	0.184433	0.170096	0.299916	0.172738	0.15059	0.28668
ENSDARG00000077697	SI:DKEY-105I14.1	si:dkey-105i14.1 [Source:ZFIN;Acc:ZDB-GENE-081103-64]	0.142004	0.459134	0.282405	-0.0666623	0.125415	-0.0457723	0.259014	0.295182	-0.0298944	0.262148	0.335428	0.0302059	0.3121	0.0748248	0.259725	-0.151155
ENSDARG00000028098	FUT9D	fucosyltransferase 9d [Source:ZFIN;Acc:ZDB-GENE-050309-15]	-0.187421	-0.143319	0.252936	-0.108626	0.129389	-0.076292	0.380617	0.218285	0.145201	0.261737	-0.0242667	0.0644306	-0.0446706	-0.10999	0.123504	0.0467159
ENSDARG00000104818	SI:CH211-93F2.1	si:ch211-93f2.1 [Source:ZFIN;Acc:ZDB-GENE-041014-96]	-0.19127	0.179058	0.198217	-0.0281743	0.315315	0.023961	0.097397	0.267445	-0.0807225	0.261518	0.030796	-0.0185385	0.1351	0.055011	0.066488	-0.189984
ENSDARG00000103210	CU929133.2	N/A	0.112796	0.22326	0.113355	0.104336	0.127175	0.267647	0.220461	0.148113	0.0175812	0.261026	0.32341	0.235087	0.115149	0.025916	0.322124	0.18526
ENSDARG00000079546	BX548000.1	N/A	0.0350791	0.281818	0.193734	0.0683982	0.230118	0.178267	0.121438	0.246688	0.172837	0.260635	0.155169	0.135124	0.194961	0.15492	0.236526	0.128148
ENSDARG00000079376	ZGC:174153	zgc:174153 [Source:ZFIN;Acc:ZDB-GENE-080215-7]	0.51875	0.28555	-0.187358	0.201552	0.000828492	0.539681	-0.091968	0.0534272	0.211133	0.26052	0.274667	0.100057	0.213053	0.204216	0.247911	-0.0020799
ENSDARG00000052113	HEXA	hexosaminidase A (alpha polypeptide) [Source:ZFIN;Acc:ZDB-GENE-050417-283]	0.0788907	0.281917	0.13419	0.282417	0.330289	0.388055	0.0734669	0.123276	0.372617	0.259817	0.151251	0.271264	0.131258	0.168329	0.0454107	0.264152
ENSDARG00000015144	SH2D4BB	SH2 domain containing 4Bb [Source:ZFIN;Acc:ZDB-GENE-130531-42]	0.0314769	0.632872	0.070368	0.179345	0.235858	0.0696152	0.0933662	0.114158	0.10708	0.259812	0.0896996	0.133171	0.130932	0.0541293	0.0831537	0.11953
ENSDARG00000100513	RPS27L	zgc:136826 [Source:ZFIN;Acc:ZDB-GENE-060331-65]	0.305383	0.155866	-0.0296908	0.0542288	-0.015636	0.273077	-0.00711988	0.0256568	0.153034	0.259704	0.0871682	0.0277664	0.179767	0.0733816	0.0670019	-0.00820188
ENSDARG00000053875	CRYBA1B	crystallin, beta A1b [Source:ZFIN;Acc:ZDB-GENE-040718-326]	-0.0462895	0.0537676	0.0958301	-0.0107393	0.287124	0.126997	0.177316	0.228286	0.129503	0.259636	0.103433	0.213732	0.215643	0.052164	0.218671	0.0543724
ENSDARG00000062319	SI:DKEY-103G5.3	si:dkey-103g5.3 [Source:ZFIN;Acc:ZDB-GENE-131127-337]	-0.327369	-0.119738	0.242105	-0.226019	0.265782	-0.352962	0.258101	0.188058	-0.249105	0.259634	-0.211639	-0.0357737	-0.0538684	-0.082012	-0.330303	-0.0343945
ENSDARG00000108245	BX927164.2	N/A	0.296096	0.23822	-0.0274511	0.0572012	0.0463298	-0.0104278	0.112099	0.123702	-0.0474088	0.259611	0.0464425	-0.0153031	0.0220572	-0.0225817	0.117311	0.0579114
ENSDARG00000063001	ATP8A1	ATPase, aminophospholipid transporter (APLT), class I, type 8A, member 1 [Source:ZFIN;Acc:ZDB-GENE-060929-36]	0.131679	0.00122115	0.102011	0.0032723	0.195709	0.149485	-0.00674812	0.0757694	0.124107	0.25953	0.202812	0.130734	-0.0293422	0.0407821	0.170129	0.14527
ENSDARG00000011998	BFSP2	beaded filament structural protein 2, phakinin [Source:ZFIN;Acc:ZDB-GENE-041212-58]	-0.197402	-0.0789684	0.0563254	0.106846	0.169421	0.13419	0.127303	0.160593	-0.011766	0.258781	0.0403111	0.129678	0.0911716	-0.0486772	0.0445292	0.0220979
ENSDARG00000101544	BX004873.6	N/A	-0.0247571	0.129613	0.0832541	-0.135114	-0.014922	-0.0916848	0.176931	0.0774743	-0.0688587	0.257943	0.0308172	0.00253721	0.0129088	0.0233639	0.123204	-0.184095
ENSDARG00000101426	CABZ01017733.1	N/A	0.0937346	0.344841	0.0701556	-0.0269151	0.154522	0.0855003	0.242345	0.116218	0.16322	0.257942	-0.0329841	0.137313	0.233544	0.101088	0.160101	-0.149804
ENSDARG00000104956	SI:DKEY-165O8.2	si:dkey-165o8.2 [Source:ZFIN;Acc:ZDB-GENE-131122-2]	0.0642715	0.0910961	0.172576	0.0655606	0.190111	-0.0319864	0.337563	-0.0598127	0.043611	0.257723	0.330612	0.10433	0.278014	0.0485642	0.110436	0.16593
ENSDARG00000073695	MAMDC2B	MAM domain containing 2b [Source:ZFIN;Acc:ZDB-GENE-091117-16]	0.174107	1.17043	0.677271	-0.203329	0.341335	-0.301587	0.218706	0.282521	-0.136251	0.257587	0.117642	-0.0490423	-0.0855624	0.0145281	-0.205934	0.109761
ENSDARG00000100137	IL17RA2	interleukin 17 receptor A2 [Source:ZFIN;Acc:ZDB-GENE-060503-869]	0.129165	0.0878304	0.162153	0.123575	0.259138	0.104396	0.219559	0.118072	0.119381	0.256495	0.215893	0.177635	0.155827	0.0089398	0.116636	0.172018
ENSDARG00000099775	CABZ01074309.1	N/A	0.149149	0.390564	0.323414	0.0901234	0.112109	0.00364721	0.229528	0.220327	0.0559638	0.255723	0.384848	0.120449	0.184512	0.0805879	0.201136	0.10077
ENSDARG00000100061	SI:DKEY-16P6.1	si:dkey-16p6.1 [Source:ZFIN;Acc:ZDB-GENE-081103-43]	0.346454	0.274638	0.125701	0.199831	0.216459	0.0729081	0.183232	0.208091	0.115903	0.254755	0.134832	0.145654	0.227928	0.235383	0.142206	0.143862
ENSDARG00000058800	RAB25A	RAB25, member RAS oncogene family a [Source:ZFIN;Acc:ZDB-GENE-041212-69]	0.103492	0.0902848	0.0567421	0.0747305	0.110617	0.0688345	0.167773	0.42283	0.00247081	0.254611	0.0841438	0.0296713	0.22388	-0.0407287	0.196561	0.0681275
ENSDARG00000053520	CABZ01079984.1	uncharacterized protein C7orf62 homolog [Source:RefSeq peptide;Acc:NP_001313643]	0.0843003	0.179439	0.225102	0.0388063	0.218036	0.193679	0.0948424	0.186573	0.107996	0.254564	0.121757	0.0295355	0.156044	0.0831271	0.0431444	-0.0737292
ENSDARG00000102594	ZGC:194627	zgc:194627 [Source:ZFIN;Acc:ZDB-GENE-081022-132]	0.287069	0.289759	0.123856	0.218315	0.242249	0.301942	0.0651092	0.0885938	0.328519	0.254133	0.154101	0.0512957	0.260421	0.0463923	0.270656	0.118181
ENSDARG00000104412	SI:DKEY-72L17.5	si:dkey-72l17.5 [Source:ZFIN;Acc:ZDB-GENE-070424-250]	0.187866	0.327739	0.330658	0.242792	0.135416	0.215596	0.243228	0.20224	0.190907	0.254036	0.220417	0.00353322	0.268516	0.108383	0.187613	0.222579
ENSDARG00000094466	SI:CH73-199E17.1	si:ch73-199e17.1 [Source:ZFIN;Acc:ZDB-GENE-100921-8]	0.188558	-0.00675195	0.212653	0.215474	0.12863	-0.0411276	0.243225	0.350673	0.025865	0.25264	0.119855	0.232634	-0.0528682	0.20076	0.233846	0.235947
ENSDARG00000037002	ZGC:152968	zgc:152968 [Source:ZFIN;Acc:ZDB-GENE-061013-448]	-0.0774184	-0.0528284	0.177062	-0.2593	-0.00813671	-0.0696321	-0.0971216	0.0131585	0.00925755	0.252357	-0.0836749	0.255017	0.120867	0.106863	-0.0859653	-0.00932552
ENSDARG00000093650	SI:CH211-287N14.3	si:ch211-287n14.3 [Source:ZFIN;Acc:ZDB-GENE-131120-146]	0.0667571	0.00305399	0.196928	0.132037	-0.178823	0.133823	0.220149	0.193963	0.174124	0.252311	-0.0315721	0.151022	0.0286157	-0.000696505	-0.0755437	0.171703
ENSDARG00000068516	HAPLN1B	hyaluronan and proteoglycan link protein 1b [Source:ZFIN;Acc:ZDB-GENE-050920-1]	-0.0259296	-0.0219444	0.226693	0.0047267	0.224348	0.0160094	0.240281	0.25734	-0.148273	0.252255	0.0703971	0.0719847	-0.00383339	0.17881	0.189199	0.102192
ENSDARG00000061547	ZGC:153409	zgc:153409 [Source:ZFIN;Acc:ZDB-GENE-060929-224]	0.0339957	-0.0879098	0.0993038	-0.0522548	0.164045	0.159956	0.0424385	0.0208972	0.134198	0.25201	-0.0269566	0.29175	0.0121035	0.10543	0.0901333	0.00537915
ENSDARG00000078728	ZNF1068	zinc finger protein 1068 [Source:ZFIN;Acc:ZDB-GENE-080215-12]	0.0974381	0.223982	0.132128	0.0693022	0.219903	-0.0494956	0.227947	0.19073	0.0198232	0.251799	0.249921	-0.0380597	0.169188	0.0973686	0.29738	0.0159622
ENSDARG00000008035	ZGC:113516	zgc:113516 [Source:ZFIN;Acc:ZDB-GENE-050320-154]	-0.116143	0.276392	0.0323703	0.249437	0.222312	0.125562	0.168093	0.0833813	0.0868074	0.251746	0.182506	0.165378	-0.0247651	0.081736	0.194746	0.191069
ENSDARG00000076572	CRYGM2D7	crystallin, gamma M2d7 [Source:ZFIN;Acc:ZDB-GENE-060918-5]	-0.222441	0.0292002	0.0837656	-0.0401268	0.19064	0.0531989	0.183708	0.113879	0.0384118	0.251216	-0.0365586	0.141503	0.0622065	-0.114124	0.0389143	-0.0340013
ENSDARG00000057687	SBK3	SH3 domain binding kinase family, member 3 [Source:ZFIN;Acc:ZDB-GENE-080204-39]	-0.141858	0.051437	0.317472	0.0477582	0.195057	0.0356164	0.339922	0.197387	-0.0284888	0.250363	0.00903494	0.27808	0.393078	0.308031	0.245184	0.209422
ENSDARG00000027582	ANGPTL7	angiopoietin-like 7 [Source:ZFIN;Acc:ZDB-GENE-041010-175]	0.0424009	0.287654	0.431219	-0.00679735	0.556695	0.197501	0.271918	0.269726	-0.0935477	0.250216	-0.0159006	0.0978968	0.028948	-0.0349849	-0.0147821	-0.00523659
ENSDARG00000104136	CR450780.4	N/A	-0.0255138	0.185802	0.130551	-0.00800027	-0.0178087	0.0959664	0.238558	0.148403	-0.0205127	0.250208	0.19412	0.111167	0.115708	0.00985777	0.284545	-0.154996
ENSDARG00000105863	FO904970.1	N/A	0.129039	0.456058	1.00907	0.410552	0.547179	0.252682	0.834514	0.776864	0.230466	0.250158	0.29927	0.211022	0.355279	0.266843	0.106538	0.275665
ENSDARG00000012395	MMP13A	matrix metallopeptidase 13a [Source:ZFIN;Acc:ZDB-GENE-031202-2]	0.164239	0.204941	0.254859	0.015431	0.320004	0.207283	0.300416	0.234149	-0.0540796	0.249696	0.493141	-0.00486317	-0.000402503	0.0241995	-0.105704	0.117457
ENSDARG00000026726	ANXA1A	annexin A1a [Source:ZFIN;Acc:ZDB-GENE-030131-6664]	0.0710638	-0.00329188	-0.142021	-0.00155458	-0.0457461	0.161189	-0.0579953	0.10551	0.100057	0.249646	-0.0328126	0.129546	0.0856352	-0.00903285	0.0373949	0.0664694
ENSDARG00000074919	CU929052.1	N/A	-0.16739	0.00609468	0.185885	0.0499569	0.324702	-0.169938	0.21225	0.138212	-0.0628958	0.249557	0.106951	0.158126	0.233089	-0.0614038	0.0010438	-0.0275406
ENSDARG00000041433	SI:DKEY-7C18.24	si:dkey-7c18.24 [Source:ZFIN;Acc:ZDB-GENE-041014-63]	0.81828	0.267465	0.487152	0.018347	0.298347	0.0611672	0.377559	0.323637	0.308417	0.249523	0.038979	0.154042	-0.050231	0.0619762	0.0703901	-0.0171827
ENSDARG00000027584	TTPA	tocopherol (alpha) transfer protein [Source:ZFIN;Acc:ZDB-GENE-030131-4631]	-0.236538	-0.0229649	0.288484	0.0548381	0.115294	-0.166592	0.228608	0.113241	-0.093616	0.248733	0.260611	0.214942	0.064976	0.167912	-0.0800026	0.0215327
ENSDARG00000099717	SI:RP71-1H20.9	si:rp71-1h20.9 [Source:ZFIN;Acc:ZDB-GENE-131127-386]	0.281362	0.281497	0.171199	0.123214	-0.00259843	0.0138667	0.206317	0.242756	0.193962	0.248375	0.210476	0.166469	0.258948	0.205604	0.157423	-0.0432484
ENSDARG00000069027	ADMB	adrenomedullin b [Source:ZFIN;Acc:ZDB-GENE-120221-6]	-0.233037	0.184552	0.359104	-0.131066	0.306371	-0.0967434	0.0169416	-0.0974483	-0.489193	0.248261	-0.146784	-0.0203755	-0.182159	-0.253834	-0.339486	0.00163947
ENSDARG00000102156	SI:DKEY-264F17.4	si:dkey-264f17.4 [Source:ZFIN;Acc:ZDB-GENE-110913-112]	0.181454	0.140144	0.0970703	0.161573	0.0885504	0.208428	0.114301	0.154263	0.151265	0.247183	0.190393	0.349395	0.242152	0.255062	0.191623	0.0853279
ENSDARG00000094760	SI:DKEY-125I10.3	si:dkey-125i10.3 [Source:ZFIN;Acc:ZDB-GENE-060526-198]	-0.0495889	0.191833	0.54013	0.0362677	0.449029	0.215008	0.275446	0.28592	0.358353	0.247138	-0.121289	0.0631603	0.0405144	-0.0812149	0.0526943	0.167342
ENSDARG00000073915	ZNF1085	zinc finger protein 1085 [Source:ZFIN;Acc:ZDB-GENE-080218-7]	-0.13817	-0.224108	-0.00834922	-0.0180863	-0.180063	0.0340068	-0.0883657	-0.14122	-0.000498765	0.247029	-0.0293415	0.199442	-0.151305	0.14192	-0.0066417	-0.00304937
ENSDARG00000104652	CABZ01017723.1	N/A	0.0866993	0.47324	0.212668	0.219692	0.21275	0.18521	0.468142	0.389443	0.0487405	0.245755	0.314621	0.165849	0.392435	0.023685	0.415315	0.0791696
ENSDARG00000100701	CABZ01068023.1	N/A	0.236548	0.249768	0.171677	0.123266	0.169179	0.156251	0.142403	0.259083	0.182914	0.245671	0.264082	0.0895365	0.167942	0.165622	0.210551	0.132913
ENSDARG00000086248	KCNJ1A.3	potassium inwardly-rectifying channel, subfamily J, member 1a, tandem duplicate 3 [Source:ZFIN;Acc:ZDB-GENE-050420-256]	0.319491	-0.0753388	0.0383648	-0.0653686	0.193462	0.0271938	0.177422	0.121814	0.0852081	0.243471	0.00479644	0.0472936	0.111098	0.170689	-0.0277956	0.177565
ENSDARG00000087301	CRYGM2D14	crystallin, gamma M2d14 [Source:ZFIN;Acc:ZDB-GENE-070822-20]	-0.318131	-0.0622359	0.0791941	0.0289215	0.279504	0.106849	0.196015	0.17783	-0.04983	0.243209	0.0386963	0.053012	0.0142535	-0.139145	-0.0208532	0.0466469
ENSDARG00000038996	EGLN1A	egl-9 family hypoxia-inducible factor 1a [Source:ZFIN;Acc:ZDB-GENE-110408-34]	0.114247	0.286193	0.257086	0.0418805	0.344069	0.198579	0.174117	0.131117	0.0594079	0.243008	0.330538	0.248512	0.123892	0.33822	0.0542608	0.296205
ENSDARG00000025046	AL935186.1	N/A	0.127112	0.284883	0.356336	-0.0176875	0.135781	0.168058	0.483861	0.375107	0.0614915	0.242871	0.313253	0.0268377	0.296622	0.0853885	0.193032	0.104055
ENSDARG00000101996	CXXC1A	CXXC finger protein 1a [Source:ZFIN;Acc:ZDB-GENE-040426-1142]	0.116575	0.0449526	0.237575	-0.00937385	0.249719	0.0726803	0.168172	0.220217	-0.0347601	0.242753	0.153342	0.00731556	0.145449	0.14518	0.0622444	0.120595
ENSDARG00000057633	CXCR4A	chemokine (C-X-C motif) receptor 4a [Source:ZFIN;Acc:ZDB-GENE-020102-1]	0.15819	0.605146	-0.00353576	0.14793	0.134104	0.423973	-0.0910497	0.216299	0.355409	0.242432	0.318839	0.0242945	-0.0434769	-0.0767788	0.111741	-0.0318368
ENSDARG00000102175	HAMP	hepcidin antimicrobial peptide [Source:ZFIN;Acc:ZDB-GENE-050726-1]	-0.0806653	0.224962	0.192041	0.0511681	0.108322	0.0956044	0.0707486	0.122738	0.0348484	0.242273	0.210352	-0.0272149	0.189441	0.0468007	0.0855938	0.0837978
ENSDARG00000060018	SI:CH1073-44G3.1	si:ch1073-44g3.1 [Source:ZFIN;Acc:ZDB-GENE-141216-124]	-0.225748	-0.0451676	0.136069	-0.169059	0.0924894	-0.315063	0.0352854	-0.0160311	-0.199044	0.241097	-0.0330334	-0.0329533	0.0138608	-0.154219	0.00235917	0.0156248
ENSDARG00000076534	SI:CH211-14A17.10	si:ch211-14a17.10 [Source:ZFIN;Acc:ZDB-GENE-030616-581]	-0.146608	0.617904	-0.0841198	-0.0707986	0.311977	-0.176558	0.00505586	-0.0131135	-0.130542	0.24076	-0.0386362	-0.199735	-0.11284	-0.0788485	-0.0875466	-0.0588917
ENSDARG00000105641	SI:CH211-98N17.5	si:ch211-98n17.5 [Source:ZFIN;Acc:ZDB-GENE-160728-87]	0.132279	0.153484	0.182067	-0.0137754	0.145389	0.0228295	0.23994	0.235616	0.0736772	0.240464	-0.0109557	0.0470996	0.105837	-0.0647656	0.278035	-0.0399654
ENSDARG00000093019	SI:DKEY-83K24.5	si:dkey-83k24.5 [Source:ZFIN;Acc:ZDB-GENE-081104-440]	0.438258	0.125643	0.355992	0.192814	0.240981	0.345463	0.288542	0.116375	0.103563	0.240288	0.159054	-0.0662102	0.0961279	0.158048	-0.0381346	-0.0065955
ENSDARG00000041108	CTSH	cathepsin H [Source:ZFIN;Acc:ZDB-GENE-030131-3539]	0.26971	0.178792	0.0181561	0.0929508	0.319102	0.297663	0.214443	0.168401	0.512545	0.240018	0.148184	0.100311	0.0200784	0.0094307	0.148345	0.0171507
ENSDARG00000051940	UGT2A1	UDP glucuronosyltransferase 2 family, polypeptide A1 [Source:ZFIN;Acc:ZDB-GENE-080721-20]	-0.0575799	0.161452	0.335678	-0.0151492	0.350061	-0.0588457	0.317077	0.213411	-0.0787652	0.239671	0.361867	0.0953726	0.206876	0.213009	0.145876	0.0113483
ENSDARG00000077673	WU:FB15H11	wu:fb15h11 [Source:ZFIN;Acc:ZDB-GENE-030131-8582]	-0.1386	0.196303	0.153882	-0.00148481	0.226097	0.0121653	0.263539	-0.0270614	-0.162268	0.239432	0.047261	-0.071857	0.0839262	-0.0158512	0.131448	0.095771
ENSDARG00000091669	SI:DKEY-17E16.17	si:dkey-17e16.17 [Source:ZFIN;Acc:ZDB-GENE-091204-161]	-0.0091982	0.261869	0.225135	-0.287539	0.363375	-0.364971	0.333805	0.375395	-0.0404733	0.238808	-0.185806	0.147636	0.221861	-0.112894	0.220024	0.120777
ENSDARG00000105063	SI:CH211-64I20.3	si:ch211-64i20.3 [Source:ZFIN;Acc:ZDB-GENE-110913-55]	0.0621084	0.19961	0.32208	0.103162	0.0559761	0.10294	0.140705	0.172578	0.0546929	0.238689	0.156985	-0.0481313	0.174613	0.194248	0.0387159	0.0981977
ENSDARG00000089233	CSGALNACT1B	chondroitin sulfate N-acetylgalactosaminyltransferase 1b [Source:ZFIN;Acc:ZDB-GENE-130530-957]	-0.198611	0.0867111	0.140086	0.305425	0.317617	0.353849	0.0994003	0.0749086	0.0902007	0.238517	0.259513	-0.00608074	-0.0477932	0.241464	0.0657978	0.0613206
ENSDARG00000061228	PFDN4	prefoldin subunit 4 [Source:ZFIN;Acc:ZDB-GENE-100922-122]	0.147088	0.100443	0.084637	0.0918656	0.345861	0.235297	0.14594	0.229501	0.257161	0.237682	0.255745	0.0391853	0.0742029	0.136967	0.145535	0.160204
ENSDARG00000094901	ABCC6B.2	ATP-binding cassette, sub-family C (CFTR/MRP), member 6b, tandem duplicate 2 [Source:ZFIN;Acc:ZDB-GENE-110208-2]	0.240283	0.482499	0.559261	-0.099549	0.524907	0.0329211	0.440045	0.354323	0.256546	0.237624	0.289695	0.0309533	0.0353697	0.114742	0.324168	-0.0199569
ENSDARG00000078674	HSPB9	heat shock protein, alpha-crystallin-related, 9 [Source:ZFIN;Acc:ZDB-GENE-080214-6]	0.10917	0.206856	0.104792	0.120272	0.175252	-0.374221	0.0490415	0.016932	0.197783	0.237573	0.128824	0.111498	0.10844	0.13967	0.321729	0.15779
ENSDARG00000097837	PIMR40	Pim proto-oncogene, serine/threonine kinase, related 40 [Source:ZFIN;Acc:ZDB-GENE-131120-45]	0.20991	0.371752	0.0353224	-0.0159042	0.103209	-0.094139	0.111545	0.127086	0.108697	0.237399	0.229683	-0.0244657	0.136937	-0.0341153	-0.0298768	-0.116835
ENSDARG00000097564	SI:CH73-190F9.4	si:ch73-190f9.4 [Source:ZFIN;Acc:ZDB-GENE-131122-94]	0.113491	-0.0137343	0.174828	0.191257	0.258142	0.109094	0.0655173	0.0850165	0.158086	0.236684	0.105354	0.0892563	-0.0341535	0.0514494	0.207979	0.113205
ENSDARG00000100399	AL935044.2	N/A	0.00697543	0.0804847	0.057825	-0.00749298	-0.0797902	-0.00202201	-0.172589	0.0106675	0.0769045	0.236138	-0.0110529	0.0149611	-0.164054	-0.0140891	0.114326	0.0692655
ENSDARG00000076839	FTR86	finTRIM family, member 86 [Source:ZFIN;Acc:ZDB-GENE-060929-108]	0.569076	0.384005	-0.0232548	0.112275	0.118116	0.252811	0.0952401	0.197721	0.226245	0.235813	0.401416	0.171373	0.0615763	-0.108294	0.0860808	0.0509273
ENSDARG00000009702	ASCL1B	achaete-scute family bHLH transcription factor 1b [Source:ZFIN;Acc:ZDB-GENE-980526-174]	0.0786256	0.328358	0.0183262	-0.0523264	0.0617995	0.16185	0.00388083	-0.015335	0.0851714	0.235569	0.0222835	-0.0709977	-0.0193973	-0.13849	-0.111103	-0.0771973
ENSDARG00000103618	BTR18	bloodthirsty-related gene family, member 18 [Source:ZFIN;Acc:ZDB-GENE-080213-2]	0.267781	0.215963	0.238234	0.424613	0.327454	0.24009	0.312396	0.346602	0.11943	0.235477	0.282659	0.029691	0.23475	0.361695	0.254865	0.25531
ENSDARG00000061841	TIPARP	TCDD-inducible poly(ADP-ribose) polymerase [Source:ZFIN;Acc:ZDB-GENE-031002-47]	0.034515	0.720322	0.55377	-0.00739725	0.434341	0.128258	0.208485	0.260767	0.0666815	0.235267	-0.061245	0.0572702	0.0939111	0.028266	-0.0715115	-0.000885764
ENSDARG00000098189	SI:DKEY-16P6.1	si:dkey-16p6.1 [Source:ZFIN;Acc:ZDB-GENE-081103-43]	0.221643	0.2545	0.0193715	0.1374	0.0675551	0.158316	0.120727	0.193383	-0.0158228	0.23479	0.180268	0.0856498	0.0267499	0.0789462	0.0838847	0.0588221
ENSDARG00000105974	CR847870.3	N/A	-0.0113993	0.129727	0.126897	0.187006	0.0176289	0.173213	-0.0639895	-0.0900671	0.173717	0.234356	0.114097	0.0412081	-0.194408	0.0358207	0.212455	0.28688
ENSDARG00000106601	CABZ01112344.2	N/A	0.0125468	0.176169	0.245368	0.169637	0.270212	-0.036369	0.14993	0.179608	0.0994879	0.234141	0.226275	0.221537	0.158445	0.282359	0.22235	0.171112
ENSDARG00000102884	SI:CH211-145H19.5	si:ch211-145h19.5 [Source:ZFIN;Acc:ZDB-GENE-110914-112]	0.00285028	0.128059	0.0944121	0.157208	0.0753574	0.122905	0.10511	0.092967	0.0825781	0.234041	0.0626925	0.0598475	0.13826	0.166386	0.173035	0.125477
ENSDARG00000022560	CLCNK	chloride channel K [Source:ZFIN;Acc:ZDB-GENE-040426-1379]	-0.00479066	-0.203699	0.231835	0.0615617	-0.00639829	0.13006	0.274754	0.210546	0.113709	0.233871	0.207162	-0.0408795	0.2883	0.0452977	0.0129744	0.0503829
ENSDARG00000055370	ZGC:163121	zgc:163121 [Source:ZFIN;Acc:ZDB-GENE-070424-80]	0.0981941	0.143293	-0.0170134	-0.0405103	0.138642	-0.147387	0.174664	0.203549	0.0784334	0.233859	-0.0110545	-0.0652359	0.0346268	-0.0985816	0.400912	-0.238458
ENSDARG00000061684	SLC25A17	solute carrier family 25 (mitochondrial carrier; peroxisomal membrane protein), member 17 [Source:ZFIN;Acc:ZDB-GENE-070620-4]	-0.0125202	0.113278	0.221942	-0.122392	0.0382217	0.0819235	0.125764	0.153293	-0.0229756	0.233602	0.0574848	0.176365	-0.0465621	0.0249156	0.265665	-0.0419187
ENSDARG00000012674	RPUSD4	RNA pseudouridylate synthase domain containing 4 [Source:ZFIN;Acc:ZDB-GENE-040801-238]	0.0457518	-0.0897069	0.100408	-0.117404	0.205782	0.0730697	0.0919366	0.0680537	-0.00417693	0.232501	0.178523	0.0224632	0.197709	0.00727751	-0.0282737	0.0428421
ENSDARG00000093628	S100A11	S100 calcium binding protein A11 [Source:ZFIN;Acc:ZDB-GENE-070717-5]	0.287005	0.142749	-0.0588134	-0.0382891	-0.0263262	0.265548	0.168496	0.0432823	0.0715503	0.232479	0.119171	0.148562	0.0694339	0.114323	0.238151	-0.0241969
ENSDARG00000087188	NFIL3-6	nuclear factor, interleukin 3 regulated, member 6 [Source:ZFIN;Acc:ZDB-GENE-040704-63]	-0.121788	0.0208362	0.185561	-0.0828834	0.0224121	-0.297641	0.356097	0.11554	-0.180984	0.231916	0.0736101	0.243414	0.205108	0.229171	0.0287226	0.119687
ENSDARG00000036008	CALY	calcyon neuron-specific vesicular protein [Source:ZFIN;Acc:ZDB-GENE-090313-405]	-0.101933	0.0786378	0.0984954	-0.0153885	-0.0454916	-0.0315716	0.0806228	0.0751148	0.017704	0.23168	0.0800479	-0.0557322	0.00267057	-0.0490649	-0.0238163	0.00536155
ENSDARG00000086463	KLHL13	kelch-like family member 13 [Source:ZFIN;Acc:ZDB-GENE-030131-2671]	0.19779	0.0481373	0.159796	0.074856	0.158784	0.0324077	0.230106	0.0338085	0.0721278	0.23118	0.047097	0.16587	0.159338	0.0454396	0.0812657	0.0562188
ENSDARG00000042630	HEBP2	heme binding protein 2 [Source:ZFIN;Acc:ZDB-GENE-040426-914]	-0.338305	-0.127111	0.049165	0.117139	0.00626957	-0.138443	0.27235	0.194418	-0.149323	0.230271	-0.11627	-0.0309822	-0.0430908	-0.0429199	-0.036126	-0.192021
ENSDARG00000102776	CXCL19	chemokine (C-X-C motif) ligand 19 [Source:ZFIN;Acc:ZDB-GENE-140708-2]	0.045792	0.516611	0.365097	0.0458535	0.188251	0.062824	0.116917	0.171204	0.0848005	0.230122	0.121716	0.0541346	0.0907191	0.0172124	0.0483788	0.0132649
ENSDARG00000041595	CES3	carboxylesterase 3 [Source:ZFIN;Acc:ZDB-GENE-030131-9563]	-0.227048	0.242657	0.318836	0.108625	0.24492	-0.0021212	0.245076	0.383534	0.266002	0.230112	0.000775409	0.173551	0.237099	0.123545	-0.0594572	0.11692
ENSDARG00000069928	PRKCEB	protein kinase C, epsilon b [Source:ZFIN;Acc:ZDB-GENE-081028-47]	0.0570621	0.0208998	0.0756643	0.0270582	0.0762327	0.0988188	0.0841051	0.179694	0.0471952	0.229617	0.108085	0.204022	0.0563561	-0.131095	0.0821711	0.0708981
ENSDARG00000106422	BX294383.3	N/A	0.379864	0.158919	0.0894129	0.219072	0.299304	-0.0325511	0.00776483	0.00759037	0.141531	0.22955	-0.0228243	0.125467	-0.00191731	0.085371	0.0765347	0.181703
ENSDARG00000024775	SI:CH211-129C21.1	si:ch211-129c21.1 [Source:ZFIN;Acc:ZDB-GENE-030131-5796]	-0.167719	0.344506	0.565695	-0.10135	0.609973	-0.0597714	0.192286	0.199403	-0.0801558	0.228639	-0.0606709	-0.110832	-0.0884336	-0.158572	-0.00325888	-0.144507
ENSDARG00000087492	FO704810.1	N/A	0.155688	0.661665	0.384882	0.259529	0.455844	0.0752117	0.162452	-0.032491	0.211833	0.228207	0.317581	0.0105038	0.095747	0.0116394	0.0879239	0.14019
ENSDARG00000087093	SI:CH211-157C3.4	si:ch211-157c3.4 [Source:ZFIN;Acc:ZDB-GENE-030131-8454]	-0.0420549	0.0163882	-0.146279	-0.18501	-0.0703443	0.0159307	-0.102465	0.089918	-0.105241	0.227867	-0.218647	-0.0120519	-0.119021	-0.0832723	0.105356	-0.0876518
ENSDARG00000100015	SI:CH211-248K15.2	si:ch211-248k15.2 [Source:ZFIN;Acc:ZDB-GENE-070705-142]	0.0804278	0.231515	0.147352	-0.03991	0.0554324	-0.181813	0.0688007	0.209584	0.179781	0.227756	0.162952	0.154443	0.355516	-0.153506	0.15867	-0.304248
ENSDARG00000093318	SI:DKEY-57A22.15	si:dkey-57a22.15 [Source:ZFIN;Acc:ZDB-GENE-081104-427]	-0.191621	0.036912	0.172757	0.0386949	0.245363	-0.160548	0.258013	0.153138	-0.193065	0.227563	0.0864391	0.174072	0.0606652	-0.0724201	0.130518	0.0911029
ENSDARG00000067544	TCF15	transcription factor 15 [Source:ZFIN;Acc:ZDB-GENE-980605-20]	0.0974449	0.48174	0.254194	0.249427	0.504015	0.227208	-0.00101775	0.18008	0.0517408	0.227543	0.241137	0.129053	0.036059	0.0444289	-0.0316649	0.0886767
ENSDARG00000058672	SI:DKEY-266F7.1	si:dkey-266f7.1 [Source:ZFIN;Acc:ZDB-GENE-061207-67]	0.00494368	0.13454	0.176965	0.181958	0.182763	0.0906842	0.1215	0.155731	0.0666543	0.22687	0.205235	0.158916	0.193295	0.238878	0.105022	0.160124
ENSDARG00000008540	SOX21B	SRY (sex determining region Y)-box 21b [Source:ZFIN;Acc:ZDB-GENE-040429-1]	0.134243	0.095325	0.159368	0.110026	0.237093	0.169142	0.13387	0.0817449	0.291226	0.226388	0.159341	0.138826	0.0241246	0.0352283	0.010007	0.125563
ENSDARG00000038805	PIGP	phosphatidylinositol glycan anchor biosynthesis, class P [Source:ZFIN;Acc:ZDB-GENE-030131-4041]	0.0712405	-0.0795395	0.0795551	0.196397	0.173088	0.213605	0.145155	0.123146	0.223826	0.226298	0.230739	0.0847708	0.111251	0.172482	0.294628	0.0367633
ENSDARG00000075151	SI:DKEY-188I13.10	si:dkey-188i13.10 [Source:ZFIN;Acc:ZDB-GENE-090313-208]	-0.0261143	-0.0414546	0.143039	0.0477574	0.0273234	-0.0658723	-0.0350847	0.033931	0.125216	0.22573	-0.0899019	0.125742	0.049168	-0.0111586	-0.00390153	-0.106791
ENSDARG00000090930	SI:CH211-120G10.1	si:ch211-120g10.1 [Source:ZFIN;Acc:ZDB-GENE-130531-56]	0.032962	0.307943	0.307919	0.135738	0.08487	0.14578	0.307752	0.132792	0.107611	0.225385	0.256357	0.0301728	0.3436	0.0947835	0.10932	0.156523
ENSDARG00000033443	MDM2	MDM2 oncogene, E3 ubiquitin protein ligase [Source:ZFIN;Acc:ZDB-GENE-990415-153]	0.27974	0.0110964	-0.0856297	0.153027	-0.0867082	0.10655	0.0420406	0.0492589	0.152124	0.224995	-0.0120765	-0.0322858	0.220805	0.228339	-0.0581614	0.0662952
ENSDARG00000021242	MVP	major vault protein [Source:ZFIN;Acc:ZDB-GENE-030826-33]	0.207397	-0.0735394	-0.181151	0.0449457	0.089363	0.489541	0.0105711	0.115746	0.0804167	0.224376	0.120882	0.0196625	-0.0196302	-0.0410543	0.188172	-0.022004
ENSDARG00000099480	CU856137.1	N/A	0.0641005	0.0989816	0.0341583	0.0657637	0.148857	0.155552	0.0777181	0.0628242	0.0790715	0.223883	0.151151	0.117983	0.0827005	0.00648691	0.212843	-0.019142
ENSDARG00000078536	MEGF9	si:ch211-158d24.2 [Source:ZFIN;Acc:ZDB-GENE-081105-115]	-0.312688	0.107581	0.0113613	-0.118773	0.235697	-0.123514	0.282918	0.0583402	-0.215322	0.223306	0.149568	0.0447062	0.0427271	0.0251147	0.112366	0.117017
ENSDARG00000017217	IGSF11	immunoglobulin superfamily member 11 [Source:ZFIN;Acc:ZDB-GENE-080303-21]	0.0796192	0.00764867	0.110358	0.0589765	0.0314553	0.0582143	0.144835	0.215195	0.0700338	0.223213	0.168098	0.162045	0.00635588	-0.0154969	0.178246	0.0685003
ENSDARG00000099178	CABZ01033309.1	N/A	0.0103954	-0.0500688	-0.0369425	0.11082	0.0716127	0.036825	0.0933136	-0.0040199	-0.0529991	0.22304	0.176843	-0.0266471	-0.0365561	-0.110341	0.102908	0.109323
ENSDARG00000053323	ZGC:112285	zgc:112285 [Source:ZFIN;Acc:ZDB-GENE-050913-132]	-0.191474	0.039515	0.218042	0.038764	0.144469	-0.174815	0.247462	0.169578	-0.0489256	0.222437	0.0392748	0.247933	-0.0593659	-0.0776314	0.0344108	0.0666411
ENSDARG00000035890	FUCA1.1	fucosidase, alpha-L- 1, tissue, tandem duplicate 1 [Source:ZFIN;Acc:ZDB-GENE-030131-7434]	0.428673	0.622877	0.118749	0.0975472	0.320706	0.351786	0.202201	0.131619	0.289717	0.222249	0.531106	0.0116171	0.0260072	-0.0320791	0.22704	0.0187799
ENSDARG00000036587	CBR1	carbonyl reductase 1 [Source:ZFIN;Acc:ZDB-GENE-030902-2]	0.136882	0.195842	0.197208	0.252143	0.193308	0.208595	0.205804	0.304424	0.195266	0.221518	-0.0230482	0.199249	-0.0574494	0.0458879	0.135407	0.166987
ENSDARG00000071017	NT5E	5'-nucleotidase, ecto (CD73) [Source:ZFIN;Acc:ZDB-GENE-040426-1261]	-0.156053	0.233948	0.143092	-0.0556021	0.258367	-0.0270164	0.184959	0.188209	0.0659966	0.221487	0.120684	0.00901907	-0.0500531	0.0799802	-0.0165765	0.0139047
ENSDARG00000100334	BX784026.1	N/A	0.0787843	0.0686226	0.0812152	0.0038238	0.0900394	0.0882943	0.0750707	0.129202	0.197165	0.221193	0.144632	0.0712471	0.0392164	0.0594533	0.0719523	0.0139176
ENSDARG00000102999	SI:DKEYP-85D8.5	si:dkeyp-85d8.5 [Source:ZFIN;Acc:ZDB-GENE-110913-144]	0.255131	0.269741	0.228119	0.0734375	0.0434756	-0.0192736	0.150147	0.169009	0.0421584	0.220919	0.0780302	0.0821834	0.152442	0.115288	0.298307	0.0283819
ENSDARG00000100350	FO681350.1	N/A	-0.06974	0.175226	0.152474	-0.0479249	0.0167211	0.201959	0.112041	0.0705087	0.103445	0.220695	0.173407	0.00271938	0.0669857	0.109447	0.191005	-0.037492
ENSDARG00000034777	TXN2	thioredoxin 2 [Source:ZFIN;Acc:ZDB-GENE-040426-1795]	0.301095	0.12402	0.106659	0.111481	0.0493229	0.167158	0.104373	0.349078	0.26842	0.220641	0.0816414	0.188758	0.0433365	0.11536	0.301441	0.145786
ENSDARG00000101137	ZNF999	zinc finger protein 999 [Source:ZFIN;Acc:ZDB-GENE-110913-39]	-0.0377673	0.258355	0.0557291	0.204997	-0.0513238	0.1092	0.0335218	0.10262	0.0489981	0.220436	0.160665	-0.0300657	0.349284	0.100087	0.132438	0.0209063
ENSDARG00000104670	CABZ01017733.2	N/A	0.102867	0.34372	0.220406	0.0154319	0.144327	0.0762596	0.170223	0.183697	0.105445	0.220398	0.132017	0.088279	0.204246	0.0208468	0.194081	0.0612338
ENSDARG00000099269	SI:DKEYP-115E12.7	si:dkeyp-115e12.7 [Source:ZFIN;Acc:ZDB-GENE-141216-398]	0.298907	0.144927	0.22238	0.144666	0.158907	0.199295	0.0317933	0.293194	0.16477	0.220165	0.0706956	0.253676	-0.00913742	0.202773	0.0184819	0.300939
ENSDARG00000088885	SI:CH1073-340I21.3	si:ch1073-340i21.3 [Source:ZFIN;Acc:ZDB-GENE-030131-199]	0.193439	0.184514	-0.0224621	0.0815728	0.336306	0.101558	0.249181	0.269371	-0.102556	0.220092	0.21501	0.186684	0.295651	0.0187368	0.199422	-0.121276
ENSDARG00000038957	FLVCR2A	feline leukemia virus subgroup C cellular receptor family, member 2a [Source:ZFIN;Acc:ZDB-GENE-111020-14]	0.310532	-0.104368	0.0353114	0.266822	0.0158262	0.461129	-0.0228703	0.072861	0.0971334	0.219786	-0.0233593	0.107562	0.0558768	0.310528	0.0733467	0.217444
ENSDARG00000103199	SI:DKEY-247K7.2	si:dkey-247k7.2 [Source:ZFIN;Acc:ZDB-GENE-031118-45]	-0.0665386	0.329127	1.20873	-0.118621	1.19787	-0.0844471	0.934609	0.615803	0.268383	0.218725	0.00384773	0.0340755	-0.123401	-0.25444	-0.0303513	0.124857
ENSDARG00000101456	ACP5B	acid phosphatase 5b, tartrate resistant [Source:ZFIN;Acc:ZDB-GENE-040718-151]	0.28422	0.537268	0.436868	0.265364	0.444762	0.288854	0.134758	0.215058	0.22154	0.218584	0.379037	0.18106	0.258826	0.0606191	0.244718	0.166966
ENSDARG00000018328	RHOCB	ras homolog family member Cb [Source:ZFIN;Acc:ZDB-GENE-040718-144]	0.0979671	0.0702569	-0.0264413	0.157866	0.0448837	0.184694	0.124312	0.0713066	0.0987299	0.217609	0.0431714	0.018447	0.0658201	0.0413762	0.231732	0.111521
ENSDARG00000104416	SI:DKEY-16P6.1	si:dkey-16p6.1 [Source:ZFIN;Acc:ZDB-GENE-081103-43]	0.0603279	0.111638	0.145588	0.182188	0.022963	0.0603103	0.132615	0.0420174	0.0673875	0.217528	0.0922243	0.108257	0.0172262	0.132201	0.0412316	0.022174
ENSDARG00000100582	SI:CH211-195B11.3	si:ch211-195b11.3 [Source:ZFIN;Acc:ZDB-GENE-141222-6]	0.120113	0.249192	-0.0470519	0.146966	0.169861	0.222344	0.0971461	0.268364	0.185088	0.217184	0.0602422	-0.0230991	-0.0637625	0.155457	0.115292	0.115927
ENSDARG00000105430	SI:CH73-368J24.11	si:ch73-368j24.11 [Source:ZFIN;Acc:ZDB-GENE-160113-46]	0.105774	0.190295	0.101131	0.0834088	0.153506	0.214054	0.234416	0.134724	0.0843577	0.216842	0.182494	0.150905	0.098805	0.145538	0.110294	0.134432
ENSDARG00000031976	NOS2B	nitric oxide synthase 2b, inducible [Source:ZFIN;Acc:ZDB-GENE-080916-1]	0.021901	-0.261849	-0.242591	0.23756	-0.157435	0.00202825	-0.0790001	0.195211	0.346579	0.21684	0.0530964	0.0825802	0.212174	-0.0167565	0.207071	0.179847
ENSDARG00000101857	CR847893.2	N/A	0.130467	0.127755	0.234775	0.141452	0.0753864	0.101564	0.249293	0.0989768	0.200503	0.216481	0.143849	0.27514	0.131365	0.355724	0.117874	0.0841481
ENSDARG00000093165	SI:DKEY-16P6.2	si:dkey-16p6.2 [Source:ZFIN;Acc:ZDB-GENE-110913-100]	0.0490545	0.0851856	0.0455393	0.167143	0.212258	0.0971569	0.12263	-0.00628706	0.0219395	0.215835	0.12352	-0.0373396	0.0841949	0.101879	0.129607	0.0156892
ENSDARG00000102859	CABZ01092170.1	N/A	0.0166562	0.0201362	0.192573	0.0756383	0.356011	0.117372	0.136437	0.188231	0.084138	0.215274	0.262821	0.0234016	0.035271	0.0356896	0.0312278	0.0611006
ENSDARG00000100311	SI:DKEY-165E24.1	si:dkey-165e24.1 [Source:ZFIN;Acc:ZDB-GENE-081103-19]	0.142926	0.26914	0.273489	-0.0893402	0.212517	0.0803012	0.457448	0.123046	0.0619708	0.215182	0.0963162	-0.0232648	0.0572095	0.0957978	0.0322735	0.0759419
ENSDARG00000037337	CNRIP1B	cannabinoid receptor interacting protein 1b [Source:ZFIN;Acc:ZDB-GENE-080722-33]	-0.340942	0.0662647	-0.0149398	-0.0165829	-0.0146631	-0.185964	0.0501002	0.154052	-0.114517	0.215134	-0.0921171	0.0550225	0.00656296	0.0500818	-0.0044864	0.0916927
ENSDARG00000077021	CALHM1	calcium homeostasis modulator 1 [Source:ZFIN;Acc:ZDB-GENE-081107-71]	0.0140271	0.186619	0.572952	0.00653927	0.222434	-0.0413972	0.0957257	0.264296	-0.0114954	0.215069	-0.0449913	-0.0186153	0.0517553	-0.071441	0.0197425	-0.0930741
ENSDARG00000103324	SI:CH211-127B6.2	si:ch211-127b6.2 [Source:ZFIN;Acc:ZDB-GENE-081103-37]	0.354989	0.229969	0.358869	0.212638	0.26248	0.137095	0.203351	0.209544	0.0250535	0.214603	0.211438	0.213399	0.21144	0.100151	0.335924	0.216192
ENSDARG00000099458	DDX46	DEAD (Asp-Glu-Ala-Asp) box polypeptide 46 [Source:ZFIN;Acc:ZDB-GENE-030131-667]	0.173895	0.0901972	0.144611	0.104046	0.321317	0.213917	0.143714	0.203944	0.223356	0.214574	0.247136	0.162657	0.193134	0.0638752	0.123874	0.220741
ENSDARG00000075595	BX537341.1	N/A	0.0623527	-0.0855672	-0.0537481	-0.189339	0.0256135	0.0488214	0.0156158	-0.0733413	0.22704	0.214518	0.0431575	0.185742	-0.014891	0.057328	0.220715	-0.15494
ENSDARG00000088432	SI:DKEY-162H11.3	si:dkey-162h11.3 [Source:ZFIN;Acc:ZDB-GENE-121214-324]	0.0240052	0.244003	0.0520339	-0.00547167	-0.0114721	0.0443298	0.215086	0.0127213	-0.0265251	0.213688	0.245732	-0.102039	-0.0782112	-0.0090236	0.13115	0.0768742
ENSDARG00000101502	CR753816.1	N/A	0.217091	0.25785	0.0419465	0.281238	0.0835204	0.0943425	0.303008	0.254994	0.328648	0.213569	0.262787	0.241282	0.229075	0.284485	0.321144	0.251207
ENSDARG00000087311	LGALS9L5	lectin, galactoside-binding, soluble, 9 (galectin 9)-like 5 [Source:ZFIN;Acc:ZDB-GENE-070822-22]	-0.0322525	-0.0378041	0.04109	-0.0199705	0.0275848	-0.00315309	0.00166194	-0.0219899	0.00130794	0.213432	-0.0209167	0.00328872	-0.0275109	0.0447962	-0.0218767	0.00405113
ENSDARG00000030634	PIMR189	Pim proto-oncogene, serine/threonine kinase, related 189 [Source:ZFIN;Acc:ZDB-GENE-081104-447]	0.211563	0.147869	0.393128	0.281575	0.190891	0.107028	0.000560203	0.406516	0.155188	0.21338	0.267919	0.112873	0.173262	0.15977	0.225385	0.103166
ENSDARG00000056587	CYP2R1	cytochrome P450, family 2, subfamily R, polypeptide 1 [Source:ZFIN;Acc:ZDB-GENE-110114-1]	0.051181	-0.164792	0.140258	-0.050252	-0.0957192	-0.158375	0.6769	0.18242	-0.176966	0.213194	-0.147323	-0.234956	0.130297	-0.200695	0.263703	-0.184419
ENSDARG00000015263	ADMA	adrenomedullin a [Source:ZFIN;Acc:ZDB-GENE-120221-5]	0.306291	0.370255	0.333113	0.110552	0.176561	0.290619	0.00306045	-0.00575289	0.208421	0.212578	-0.0569027	0.0882071	-0.139389	0.140494	-0.032363	0.0911778
ENSDARG00000035603	DAO.2	D-amino-acid oxidase, tandem duplicate 2 [Source:ZFIN;Acc:ZDB-GENE-040426-2634]	0.169722	0.268549	0.205653	-0.0242202	0.00893446	0.279151	0.324567	0.0475867	0.168168	0.212472	0.50059	-0.00179874	0.293114	0.0412849	0.263652	-0.0650006
ENSDARG00000090444	PONZR1	plac8 onzin related protein 1 [Source:ZFIN;Acc:ZDB-GENE-070727-1]	0.0261324	0.132182	0.192314	-0.141971	-0.0285254	0.0482704	0.252657	0.290765	0.0193129	0.211894	-0.0479363	0.0447556	-0.0355281	0.00890738	0.177952	-0.055936
ENSDARG00000104807	SI:CH73-221F6.3	si:ch73-221f6.3 [Source:ZFIN;Acc:ZDB-GENE-121214-21]	0.0249758	-0.0932131	-0.143891	0.246173	-0.00751874	0.0105759	-0.0973304	-0.1606	0.0205387	0.211825	-0.137273	-0.0904485	-0.00786492	0.168621	-0.128524	0.0412828
ENSDARG00000033144	PSME2	proteasome activator subunit 2 [Source:ZFIN;Acc:ZDB-GENE-991110-16]	0.36989	0.255536	0.0466983	-0.143487	0.192749	0.226305	0.0984414	0.0340898	0.0191453	0.211581	0.0483104	-0.0227551	-0.107348	0.0233176	-0.00887721	0.0376505
ENSDARG00000104207	PCYT1BB	phosphate cytidylyltransferase 1, choline, beta b [Source:ZFIN;Acc:ZDB-GENE-051120-48]	-0.0224935	-0.0355155	0.299268	0.0717723	0.355506	-0.146082	0.262466	0.184329	-0.0341753	0.21132	0.0142895	-0.13959	0.0812625	-0.0549468	0.0204554	-0.00890772
ENSDARG00000076320	ANO9A	anoctamin 9a [Source:ZFIN;Acc:ZDB-GENE-071004-46]	-0.142658	0.271088	0.187912	-0.175184	0.0986361	-0.338156	0.175721	0.175676	0.106952	0.21123	0.194948	-0.144122	0.00120389	-0.167287	0.121706	-0.113015
ENSDARG00000095448	FTR30	finTRIM family, member 30 [Source:ZFIN;Acc:ZDB-GENE-070912-106]	-0.0458753	0.0913812	0.198437	0.116377	0.148418	0.0662579	0.151016	0.0487239	0.109578	0.21115	0.0720401	0.176741	0.205528	0.133609	0.0624433	0.0955151
ENSDARG00000104036	SI:DKEY-281I8.1	si:dkey-281i8.1 [Source:ZFIN;Acc:ZDB-GENE-060503-70]	0.07081	-0.0697822	0.183554	0.169799	0.126939	-0.110525	0.166358	-0.0613519	-0.110058	0.211112	0.12373	0.0517375	0.117553	0.0155967	0.0106993	-0.123157
ENSDARG00000078366	ROBO2	roundabout, axon guidance receptor, homolog 2 (Drosophila) [Source:ZFIN;Acc:ZDB-GENE-001019-1]	-0.138236	-0.0216244	-0.0435557	-0.12959	0.164522	-0.267933	0.183043	0.0625134	-0.170779	0.210934	0.115926	-0.0725807	0.108261	0.0337123	0.0287142	0.00738986
ENSDARG00000002391	TLCD1	TLC domain containing 1 [Source:ZFIN;Acc:ZDB-GENE-041010-173]	0.00748017	0.179385	0.250652	0.0826304	0.193084	0.0579299	0.13218	0.145992	0.055694	0.210875	0.136652	0.0201166	0.0562407	0.0676659	-0.0143819	0.115438
ENSDARG00000087927	NUDT9	nudix (nucleoside diphosphate linked moiety X)-type motif 9 [Source:ZFIN;Acc:ZDB-GENE-040426-2669]	-0.0724951	-0.0538576	-0.0991968	0.0287395	-0.097591	0.268409	0.116586	0.231709	0.0692764	0.21052	0.0600705	0.137934	-0.0305407	-0.0753714	0.0218401	-0.0260867
ENSDARG00000101455	SI:CH211-284K5.2	si:ch211-284k5.2 [Source:ZFIN;Acc:ZDB-GENE-131127-514]	0.0182084	0.0741311	0.0795466	-0.000194299	0.034355	0.0257819	0.0583074	0.0586193	0.095309	0.210182	0.0459717	0.0189186	0.0915845	0.0026958	0.0128027	0.0876737
ENSDARG00000061682	BICC1A	BicC family RNA binding protein 1a [Source:ZFIN;Acc:ZDB-GENE-101223-3]	-0.131875	0.589799	0.400963	-0.0545902	0.276285	-0.112908	0.158378	0.123954	-0.116537	0.21005	-0.0781139	0.00877302	-0.124996	0.0533554	-0.0905823	-0.0845681
ENSDARG00000013966	PSMA6B	proteasome subunit alpha 6b [Source:ZFIN;Acc:ZDB-GENE-040718-329]	0.0624988	0.196908	0.119919	0.149417	0.183382	0.0665072	0.143884	0.139934	-0.0548275	0.210038	0.152884	0.0866976	0.145883	-0.0281942	-0.0082299	-0.0532924
ENSDARG00000012066	DCN	decorin [Source:ZFIN;Acc:ZDB-GENE-010102-1]	0.0422353	0.14227	0.163888	-0.0139797	0.0760861	0.0818321	0.193798	0.292424	-0.0371565	0.210031	0.141359	0.00366683	0.228341	0.0237316	0.197668	0.0331875
ENSDARG00000074001	CRYGMXL2	crystallin, gamma MX, like 2 [Source:ZFIN;Acc:ZDB-GENE-050522-401]	-0.185141	-0.00131592	0.0882128	0.0987954	0.207406	0.0749991	0.0777736	0.0832327	-0.009476	0.209726	0.0566194	0.153112	0.151177	-0.0292948	0.00385487	-0.0137421
ENSDARG00000018303	ETV4	ets variant 4 [Source:ZFIN;Acc:ZDB-GENE-990415-71]	0.143549	0.124527	0.292384	0.104508	0.282573	0.103281	0.16656	0.177513	0.0556728	0.209466	0.247008	0.0732295	0.223536	0.264343	0.074159	0.223822
ENSDARG00000020866	APOA4B.2	apolipoprotein A-IV b, tandem duplicate 2 [Source:ZFIN;Acc:ZDB-GENE-030131-3143]	0.1762	0.0122351	0.183705	0.0904233	0.44529	0.0324734	0.400966	0.386928	0.0593674	0.209162	0.328874	0.0963541	0.220891	0.0928233	0.147036	0.205426
ENSDARG00000102959	ZGC:171220	zgc:171220 [Source:ZFIN;Acc:ZDB-GENE-071004-11]	-0.0696902	0.220821	0.255588	-0.121525	0.0711942	-0.0826589	0.0608975	0.107656	0.038636	0.208906	-0.162138	0.0327402	0.166936	-0.0689636	0.134419	-0.0840155
ENSDARG00000102888	GPR39	G protein-coupled receptor 39 [Source:ZFIN;Acc:ZDB-GENE-040426-1395]	-0.200634	0.276874	-0.0314065	-0.164618	0.407135	-0.0457517	0.324907	0.205751	0.124074	0.208838	0.303463	0.0119988	0.276126	-0.175824	0.060018	-0.0299397
ENSDARG00000028784	SI:DKEY-24P1.6	si:dkey-24p1.6 [Source:ZFIN;Acc:ZDB-GENE-060503-67]	0.148885	0.124436	0.245266	0.325322	0.167117	0.0867163	0.00151294	0.220598	0.254877	0.20866	0.346769	0.310538	-0.0418252	0.166152	0.127525	0.307862
ENSDARG00000007891	MEOX1	mesenchyme homeobox 1 [Source:ZFIN;Acc:ZDB-GENE-040718-149]	0.0710642	0.53123	0.397359	0.0694755	0.0155049	0.241394	0.0727485	0.162517	0.0294041	0.208545	-0.0394463	0.0224141	-0.0885309	0.0370874	0.163499	-0.103193
ENSDARG00000073787	SI:CH73-303B9.1	si:ch73-303b9.1 [Source:ZFIN;Acc:ZDB-GENE-131127-391]	0.214998	0.291455	0.217795	0.22609	0.21698	0.273293	0.288979	0.486884	0.26321	0.208432	0.137213	0.322385	0.239612	0.304521	0.192607	0.273401
ENSDARG00000095076	SI:DKEY-73P2.3	si:dkey-73p2.3 [Source:ZFIN;Acc:ZDB-GENE-131126-12]	-0.0873297	0.11619	0.0587533	-0.00608829	0.193086	-0.103683	-0.163021	-0.0640827	-0.0603891	0.207531	-0.132853	-0.025642	0.0309999	0.164018	0.103245	-0.0587199
ENSDARG00000108533	CU929521.3	N/A	0.299871	-0.0320287	0.0472827	0.0314585	-0.158752	-0.0454209	0.269097	0.00419978	0.340784	0.207007	-0.198153	0.238986	0.00477898	0.274563	0.117519	0.0696029
ENSDARG00000093660	SI:DKEY-6F10.3	si:dkey-6f10.3 [Source:ZFIN;Acc:ZDB-GENE-041210-339]	0.07022	0.0792775	0.138459	0.044731	0.167462	-0.00389317	0.0993147	0.175416	0.108276	0.206182	0.00170333	0.093487	0.0278546	0.000826337	0.122268	0.0314681
ENSDARG00000077169	SI:CH211-153B23.4	si:ch211-153b23.4 [Source:ZFIN;Acc:ZDB-GENE-030131-7332]	0.337618	0.0408735	-0.078434	-0.198384	-0.018252	0.146064	-0.00416764	0.0918234	0.00154177	0.206124	0.11915	0.0835119	-0.057692	0.081711	0.216032	-0.0134746
ENSDARG00000099552	BX927387.1	N/A	0.20855	0.395768	-0.0497475	0.274976	0.16668	0.114745	0.28493	0.0701069	0.237109	0.20595	0.291662	0.0713183	0.181488	0.245064	0.385993	0.186102
ENSDARG00000022615	SI:CH211-241E1.3	si:ch211-241e1.3 [Source:ZFIN;Acc:ZDB-GENE-030131-230]	-0.0162807	-0.103642	-0.0597693	-0.11563	0.262549	0.243736	0.00852538	0.0753643	-0.0940233	0.205731	0.0225373	0.0284225	0.124148	-0.00979222	0.0176852	0.013876
ENSDARG00000007715	LGSN	lengsin, lens protein with glutamine synthetase domain [Source:ZFIN;Acc:ZDB-GENE-060312-26]	-0.171263	0.0170124	0.1522	0.0305786	0.273477	0.00250892	0.227988	0.241172	-0.0968825	0.205325	0.0574841	0.11747	0.0579675	0.0134869	0.0624842	-0.00167343
ENSDARG00000102907	CABZ01072043.1	N/A	0.0869758	0.0737055	0.325605	-0.0914388	0.471246	0.0970935	0.49207	0.275862	0.220677	0.20491	0.12332	0.181854	-0.130386	-0.0386125	-0.0313876	0.113535
ENSDARG00000091728	ZGC:114046	zgc:114046 [Source:ZFIN;Acc:ZDB-GENE-050320-24]	0.032123	-0.114131	0.0246816	-0.0217616	-0.0206591	0.121488	0.0414673	0.018909	0.101734	0.204809	0.0305602	0.0337897	0.0169325	0.192856	0.105535	0.105614
ENSDARG00000052917	SI:CH211-202F3.3	si:ch211-202f3.3 [Source:ZFIN;Acc:ZDB-GENE-080917-19]	-0.0186809	-0.24433	0.0401099	0.108463	-0.0542378	0.00302883	0.237599	-0.0562099	0.315217	0.204564	0.163435	0.121021	0.120852	0.114568	0.0393674	0.022629
ENSDARG00000098415	CT956093.1	N/A	0.079674	0.0565016	0.0647309	-0.00975897	0.298493	-0.0331713	0.116183	0.200819	0.0491577	0.204541	0.0544415	0.0151849	0.131178	-0.109967	-0.0362587	0.0896391
ENSDARG00000056917	SI:RP71-45G20.4	si:rp71-45g20.4 [Source:ZFIN;Acc:ZDB-GENE-070912-709]	0.173941	0.0312029	0.302535	0.148147	0.0872589	0.14735	0.089551	0.00643827	0.174724	0.20408	0.0791733	0.0536543	0.0791628	0.0422882	0.15531	0.032944
ENSDARG00000087645	ZNF1064	zinc finger protein 1064 [Source:ZFIN;Acc:ZDB-GENE-110913-175]	0.34072	0.173323	0.0723923	-0.0315096	0.0140871	-0.180879	0.0878199	0.0928753	0.0641615	0.203383	0.062838	0.0768058	0.31587	0.00536454	0.0586582	-0.205948
ENSDARG00000098124	EGFL6	EGF-like-domain, multiple 6 [Source:ZFIN;Acc:ZDB-GENE-040718-157]	0.277228	0.185301	0.0985392	0.113373	0.0700357	0.317863	0.194649	0.242519	0.240929	0.203328	-0.00135234	0.198582	-0.0867952	0.00543927	0.219752	0.176591
ENSDARG00000090722	LEG1.1	liver-enriched gene 1, tandem duplicate 1 [Source:ZFIN;Acc:ZDB-GENE-030131-1178]	0.118732	0.196226	0.190177	-0.161128	0.203142	-0.0721027	0.115694	0.0315893	-0.163761	0.202699	0.00505369	0.122135	0.19818	-0.0106223	0.042481	0.0779924
ENSDARG00000089131	IL17REL	interleukin 17 receptor E-like [Source:ZFIN;Acc:ZDB-GENE-120112-1]	0.0953208	0.0674239	0.256183	0.0697748	0.206567	0.138713	0.130978	0.125596	0.0826336	0.202584	0.0113925	0.0485541	0.030981	0.0577243	0.120636	0.0804871
ENSDARG00000055053	ITIH1	inter-alpha-trypsin inhibitor heavy chain 1 [Source:ZFIN;Acc:ZDB-GENE-130530-650]	0.0462942	0.0404671	0.0778784	0.0996556	0.0937266	-0.0669608	0.118224	0.0767783	-0.00142172	0.202514	-0.0219352	0.116783	0.0844535	-0.0242772	-0.0343382	0.0560572
ENSDARG00000094559	ZGC:174855	zgc:174855 [Source:ZFIN;Acc:ZDB-GENE-071004-74]	0.63608	0.345743	-0.140408	0.218873	0.0476704	0.620754	-0.0931277	0.257708	0.402605	0.202305	0.398236	0.368536	0.294572	0.368521	0.341529	0.154358
ENSDARG00000076807	ZGC:174268	zgc:174268 [Source:ZFIN;Acc:ZDB-GENE-080219-18]	0.0688021	0.0918775	0.113926	0.236739	0.0611584	0.165405	0.0926471	0.047473	0.448506	0.201599	0.164732	0.253477	0.0751799	0.328131	0.212549	0.0979617
ENSDARG00000074839	IMPG1B	interphotoreceptor matrix proteoglycan 1b [Source:ZFIN;Acc:ZDB-GENE-101007-1]	-0.50433	0.0509733	0.299044	0.0449846	0.119256	-0.297983	0.313032	0.146549	-0.219518	0.201459	0.281215	0.237309	0.298634	0.26266	0.134797	0.142796
ENSDARG00000040252	ATP1A1A.5	ATPase, Na+/K+ transporting, alpha 1a polypeptide, tandem duplicate 5 [Source:ZFIN;Acc:ZDB-GENE-020501-1]	0.962375	0.487398	-0.177345	0.0965626	0.0984254	0.60178	0.114405	0.0321047	0.48406	0.201403	0.373149	0.0152705	0.174534	0.0959982	0.335366	0.00343937
ENSDARG00000100401	CABZ01067175.1	N/A	0.00432842	0.00036614	0.0347547	0.069583	0.14271	0.0418058	0.0483366	0.116538	0.0965981	0.201054	0.120351	0.0612243	0.141351	0.237591	0.0133732	0.0725532
ENSDARG00000108307	BX005448.3	N/A	0.152349	0.228217	0.187558	0.00689627	0.209273	0.122874	0.0632299	0.167431	0.0959301	0.20081	0.0885935	0.114544	0.10539	0.226606	0.131764	0.075399
ENSDARG00000000002	CCDC80	coiled-coil domain containing 80 [Source:ZFIN;Acc:ZDB-GENE-030616-56]	0.047831	-0.139456	0.168132	0.0282067	0.0680849	-0.0543776	-0.0586932	0.014707	-0.0798739	0.200322	0.0386438	0.0489711	-0.0253389	-0.0895883	-0.0943039	-0.0712297
ENSDARG00000108400	BX649308.3	N/A	0.057887	0.0646993	-0.182344	0.0277831	-0.10584	0.0373054	-0.00510573	0.0393478	0.0276376	0.200149	0.152921	-0.0425352	0.166385	0.0823861	0.165453	-0.0622788
ENSDARG00000003203	RHCGA	Rh family, C glycoprotein a [Source:ZFIN;Acc:ZDB-GENE-070424-81]	0.240259	0.284059	0.244405	0.0131083	0.100573	0.120522	0.369039	0.190283	0.0932297	0.199883	0.149992	0.0104941	0.245744	-0.100738	0.213386	0.112815
ENSDARG00000099262	SI:DKEY-16P6.1	si:dkey-16p6.1 [Source:ZFIN;Acc:ZDB-GENE-081103-43]	-0.00865185	0.291395	0.180634	0.067371	0.161549	0.0196557	0.089597	0.134882	0.12061	0.199554	0.0704072	0.276154	0.140646	0.267261	0.131384	0.190779
ENSDARG00000031049	IGSF21A	immunoglobin superfamily, member 21a [Source:ZFIN;Acc:ZDB-GENE-050809-118]	-0.183819	0.162442	0.147443	-0.199203	0.182203	-0.133875	0.398387	0.273113	-0.272812	0.199477	0.118173	0.0126329	0.15144	-0.113611	0.0708606	0.0352967
ENSDARG00000106212	CABZ01012141.2	N/A	0.121016	0.241807	0.181157	0.0610211	0.0412262	0.342165	0.255891	0.247837	0.088474	0.198694	0.136792	-0.00327061	0.273004	0.0468118	0.132565	0.0155209
ENSDARG00000095025	CR388166.1	N/A	0.0908868	0.117787	0.114146	-0.136245	0.096054	0.109957	-0.0288405	0.0642778	-0.00422836	0.19789	-0.0287372	-0.0874558	0.109613	0.0549033	0.244486	0.0913575
ENSDARG00000036700	SI:CH211-114N24.6	si:ch211-114n24.6 [Source:ZFIN;Acc:ZDB-GENE-120214-26]	0.183337	-0.116834	-0.136162	-0.00125895	0.0622002	0.146608	-0.0201005	-0.0948129	0.0630501	0.197334	-0.0703197	-0.160064	-0.0672019	-0.060129	-0.0674075	0.0835556
ENSDARG00000069469	KHDRBS2	KH domain containing, RNA binding, signal transduction associated 2 [Source:ZFIN;Acc:ZDB-GENE-061013-497]	-0.162175	-0.073634	0.0151837	-0.0881733	-0.0337061	-0.181079	0.23861	0.114721	-0.321272	0.197047	-0.147492	0.00733364	0.106994	0.02903	-0.0432926	0.178413
ENSDARG00000105625	SI:CABZ01007812.1	si:cabz01007812.1 [Source:ZFIN;Acc:ZDB-GENE-160728-152]	-0.0501149	0.560342	0.240322	-0.0145594	0.338214	-0.0214975	0.368779	0.108878	0.0199574	0.196811	0.349923	-0.0735595	0.330233	-0.0904655	0.178973	-0.142838
ENSDARG00000102475	SI:DKEY-3P4.1	si:dkey-3p4.1 [Source:ZFIN;Acc:ZDB-GENE-081103-34]	0.082869	0.0930739	0.00709226	0.0910516	0.162873	0.0771953	0.0922257	0.11904	0.0868681	0.19666	0.146723	0.0531896	0.198181	0.150952	0.0862867	0.0621891
ENSDARG00000053502	CRYAA	crystallin, alpha A [Source:ZFIN;Acc:ZDB-GENE-020508-1]	-0.0423001	-0.159892	0.0782626	0.0845487	-0.0464476	0.0278687	-0.0210968	0.139847	0.0995857	0.19604	-0.114029	0.163168	0.15547	0.145101	-0.0519567	0.0218232
ENSDARG00000043323	LNX1	ligand of numb-protein X 1 [Source:ZFIN;Acc:ZDB-GENE-030131-9439]	0.0574365	-0.0554077	-0.0451269	0.111162	0.0980962	0.206312	0.11046	0.0164505	-0.145962	0.195921	-0.0325872	0.0776147	0.187045	0.0820187	-0.117843	0.0555306
ENSDARG00000103197	SI:DKEY-71L4.1	si:dkey-71l4.1 [Source:ZFIN;Acc:ZDB-GENE-060526-331]	0.153093	0.220168	0.0125217	0.0667885	0.148888	0.0782924	0.11375	0.0688519	0.125079	0.195906	0.148969	0.0652369	0.0419529	0.303764	0.0807388	0.102267
ENSDARG00000019365	ZGC:110712	zgc:110712 [Source:ZFIN;Acc:ZDB-GENE-050417-50]	-0.0221164	0.158652	0.493746	0.0098968	0.432464	-0.0144	0.245403	0.423256	0.0766877	0.195158	-0.106389	0.0550675	0.116316	0.148444	0.0183032	0.13695
ENSDARG00000095930	MYHA	myosin, heavy chain a [Source:ZFIN;Acc:ZDB-GENE-060531-50]	0.153241	-0.0742051	0.19076	0.207473	0.144551	-0.0483019	0.202805	0.099203	-0.0794502	0.195051	0.437289	-0.0805315	0.020902	0.174162	0.155615	0.0537145
ENSDARG00000094088	SI:CH211-229N2.7	si:ch211-229n2.7 [Source:ZFIN;Acc:ZDB-GENE-030131-8579]	-0.0993131	0.181132	0.301868	-0.0927442	0.286149	-0.122684	0.15497	0.22908	-0.151763	0.194854	0.0553499	-0.205716	0.167428	0.0441599	0.0608994	0.0279233
ENSDARG00000098632	CR388145.1	N/A	0.150434	0.145847	0.0864027	0.103396	0.0393373	-0.00282522	0.0411591	0.124357	0.0853143	0.194583	0.0595968	0.0990073	0.161382	0.0500495	0.0203197	0.124865
ENSDARG00000103789	TMEM130	transmembrane protein 130 [Source:ZFIN;Acc:ZDB-GENE-080204-23]	-0.0375379	0.35368	0.375448	0.0434644	0.332617	0.309076	0.151209	0.177755	0.2574	0.194212	0.110454	0.146353	0.164215	0.145526	0.116181	0.0299868
ENSDARG00000075903	CHADLB	chondroadherin-like b [Source:ZFIN;Acc:ZDB-GENE-121205-5]	-0.341352	-0.460521	-0.060812	-0.226373	-0.0306163	-0.299924	0.154305	0.115456	-0.394798	0.193987	-0.131421	-0.128534	0.0400807	-0.0559286	-0.0288706	-0.111391
ENSDARG00000094202	CT583646.2	N/A	-0.050144	0.16163	0.00504482	0.000329935	0.104925	-0.0642367	-0.0122121	-0.0323471	0.173678	0.193919	-0.028508	-0.0655399	-0.0565653	-0.172536	-0.0322208	-0.316394
ENSDARG00000103654	CABZ01084230.2	N/A	0.149611	0.214246	0.0917734	-0.114225	0.0193405	0.0105207	0.0961461	0.0527844	0.00114159	0.193511	0.216561	-0.0343279	0.180754	0.00139729	-0.0890615	0.0552651
ENSDARG00000100702	ZGC:174680	zgc:174680 [Source:ZFIN;Acc:ZDB-GENE-080204-24]	0.223813	0.04874	-0.0038012	0.0240814	0.0289649	0.19876	0.201122	0.0810878	0.0461615	0.193347	0.113097	0.0597854	0.212022	0.0662424	0.378503	0.0510329
ENSDARG00000093323	SI:CH211-114L13.1	si:ch211-114l13.1 [Source:ZFIN;Acc:ZDB-GENE-070424-109]	0.0853584	0.0448782	0.136766	0.206583	0.119528	0.0107389	0.085901	0.0726336	0.0513875	0.192149	0.229983	-0.0188248	0.0251042	0.00820895	0.192228	0.1146
ENSDARG00000104023	MAG	myelin associated glycoprotein [Source:ZFIN;Acc:ZDB-GENE-041217-24]	-0.198198	-0.105293	0.118521	-0.045699	0.262759	-0.143622	0.16294	0.135548	-0.306531	0.191789	-0.0910258	0.0183328	0.011009	0.0778405	-0.0258347	0.189221
ENSDARG00000099558	NPC1L1	NPC1 like intracellular cholesterol transporter 1 [Source:HGNC Symbol;Acc:HGNC:7898]	-0.338056	0.117611	0.421685	0.034964	0.150343	-0.247758	0.133923	0.0407721	-0.129866	0.191602	0.066942	0.151432	0.081533	0.0812115	0.0207206	0.0222901
ENSDARG00000093476	SI:DKEY-175D9.2	si:dkey-175d9.2 [Source:ZFIN;Acc:ZDB-GENE-131119-97]	0.105672	0.172117	0.364175	0.194052	0.329709	-0.0903693	0.1162	0.0452272	-0.0450867	0.191496	0.346849	-0.0368561	0.157335	0.264343	0.207859	0.0524322
ENSDARG00000007080	RHCGL1	Rh family, C glycoprotein, like 1 [Source:ZFIN;Acc:ZDB-GENE-060209-2]	0.0585478	0.249227	0.168622	0.188981	0.193805	0.150119	0.144754	0.124766	0.0458119	0.191437	0.221164	0.10413	0.175735	0.174342	0.17027	0.139918
ENSDARG00000039052	KLHL40A	kelch-like family member 40a [Source:ZFIN;Acc:ZDB-GENE-050916-1]	0.04737	0.0211355	0.159966	0.00282143	0.177807	-0.0731781	0.147588	0.163747	0.0144726	0.191298	0.14422	0.0179404	-0.0213962	0.0737059	0.259729	0.0146877
ENSDARG00000098582	ZNF1040	zinc finger protein 1040 [Source:ZFIN;Acc:ZDB-GENE-141210-11]	0.0209522	0.154045	-0.00710531	0.14119	-0.189263	0.103139	0.288592	0.0429948	0.0149217	0.191122	0.0973957	-0.0945957	0.134288	0.111894	-0.0284258	-0.0787676
ENSDARG00000024141	CAV3	caveolin 3 [Source:ZFIN;Acc:ZDB-GENE-050522-426]	0.145923	0.0997066	0.143783	0.245002	0.178183	0.214855	-0.0422572	0.0506077	0.0901776	0.191007	0.0639558	0.117984	0.0639335	0.0896569	-0.00430378	0.235333
ENSDARG00000036140	CRYBGX	crystallin beta gamma X [Source:ZFIN;Acc:ZDB-GENE-070410-2]	-0.0281013	-0.0500394	0.194457	0.0482604	0.208548	0.0341717	0.108185	0.0666237	0.0119541	0.190705	0.0156437	0.0410187	0.0607576	0.0366832	0.022096	0.0551861
ENSDARG00000035257	AKR1A1A	aldo-keto reductase family 1, member A1a (aldehyde reductase) [Source:ZFIN;Acc:ZDB-GENE-040808-44]	0.301674	0.156629	-0.162766	-0.135023	0.0389757	0.260376	0.167198	0.266963	0.143942	0.190248	-0.00966401	-0.0128512	0.0532989	-0.00884492	0.118597	-0.164864
ENSDARG00000097768	LTBP1	latent transforming growth factor beta binding protein 1 [Source:ZFIN;Acc:ZDB-GENE-091202-8]	0.126773	0.104612	0.21451	0.10063	0.124802	0.0782166	0.173979	0.243116	0.114119	0.190175	0.00148472	0.224417	0.0276358	0.0741639	-0.0486484	0.0870377
ENSDARG00000025670	FSTL3	follistatin-like 3 (secreted glycoprotein) [Source:ZFIN;Acc:ZDB-GENE-050913-111]	-0.0775337	0.0967052	0.266162	-0.105871	0.201025	-0.201274	0.244619	0.129359	-0.174964	0.190056	0.170732	0.0866609	0.232112	0.0246671	-0.0860982	0.215892
ENSDARG00000038052	SI:CH211-149K23.9	si:ch211-149k23.9 [Source:ZFIN;Acc:ZDB-GENE-100922-15]	0.00580355	0.168662	0.261965	0.192336	0.0719696	0.166768	0.0673354	0.0714955	0.0563309	0.190049	0.216406	-0.00398593	0.061071	0.25828	0.221123	0.156287
ENSDARG00000062268	JARID2B	jumonji, AT rich interactive domain 2b [Source:ZFIN;Acc:ZDB-GENE-060503-246]	0.126496	0.00760413	-0.0296275	0.00815142	0.0612947	0.104062	0.0526357	0.144287	0.26818	0.189666	0.119727	0.0818488	-0.0839773	-0.0749969	0.142842	0.0217092
ENSDARG00000056695	PHC2A	polyhomeotic homolog 2a (Drosophila) [Source:ZFIN;Acc:ZDB-GENE-020312-1]	0.14833	0.132515	0.169176	0.182073	0.258111	0.245789	0.140902	0.132044	0.0995272	0.189601	0.181589	0.106355	0.104028	0.175874	0.0829947	0.176321
ENSDARG00000070618	TATDN2	TatD DNase domain containing 2 [Source:ZFIN;Acc:ZDB-GENE-081022-51]	0.00923219	-0.119982	-0.0107598	-0.0251838	0.0335127	-0.0807956	0.0368484	-0.00882663	-0.0526527	0.18948	0.0482337	-0.0262912	0.0473992	0.128072	-0.0793665	0.0101563
ENSDARG00000011640	SYT5B	synaptotagmin Vb [Source:ZFIN;Acc:ZDB-GENE-050522-134]	-0.815213	0.0524976	0.224223	-0.037538	0.0736216	-0.76904	0.180467	0.008208	-0.894017	0.189279	-0.115107	-0.0774221	-0.0632965	-0.0543584	-0.197528	0.0452616
ENSDARG00000058325	CASP8	caspase 8, apoptosis-related cysteine peptidase [Source:ZFIN;Acc:ZDB-GENE-000713-1]	0.145656	-0.0170655	-0.0181875	-0.0437302	-0.0396125	0.222735	-0.0785414	-0.0093856	-0.03028	0.189035	-0.0698871	-0.038019	0.0764852	0.0778932	-0.178178	-0.00520139
ENSDARG00000095687	SI:DKEY-84O3.7	si:dkey-84o3.7 [Source:ZFIN;Acc:ZDB-GENE-091113-30]	0.0474022	0.013424	0.0217267	0.0333869	0.0931052	-0.010727	0.0251985	0.135421	0.0463367	0.188944	0.0105254	0.0688827	0.0318354	0.0638898	0.00977237	0.0848444
ENSDARG00000099605	FO834829.1	N/A	0.0605438	-0.0406827	0.0153136	0.136186	-0.0372809	0.110168	0.224947	0.138335	0.0752051	0.188864	0.0898027	0.135375	0.0604265	0.0259737	0.240469	0.18195
ENSDARG00000093304	SI:DKEY-221J11.3	si:dkey-221j11.3 [Source:ZFIN;Acc:ZDB-GENE-090313-247]	0.145911	0.252095	-0.11285	-0.226811	-0.0168194	-0.287002	0.188493	0.277933	0.090855	0.18886	0.0470777	0.205013	0.0332279	0.12538	0.339735	0.136602
ENSDARG00000097937	SI:DKEY-172K15.5	si:dkey-172k15.5 [Source:ZFIN;Acc:ZDB-GENE-131127-219]	0.18685	0.346567	0.145201	0.0576831	0.0967138	0.0609152	0.160605	0.16221	0.201901	0.188366	0.27026	0.101971	0.171289	0.0928985	0.206531	0.132502
ENSDARG00000033802	CYP27A7	cytochrome P450, family 27, subfamily A, polypeptide 7 [Source:ZFIN;Acc:ZDB-GENE-081104-519]	-0.199553	0.221618	0.0675187	0.0765212	0.261648	0.000841302	0.302014	0.18888	0.055846	0.187781	0.115529	0.145434	-0.0107053	-0.0525084	0.12697	-0.104159
ENSDARG00000095997	ZNF1112	zinc finger protein 1112 [Source:ZFIN;Acc:ZDB-GENE-110913-179]	0.150431	0.262147	0.101116	0.0668859	0.118652	0.0653025	0.192534	0.0199918	0.13217	0.187473	0.096769	0.0213016	0.189825	0.152862	0.0731445	0.094597
ENSDARG00000101892	INO80E	INO80 complex subunit E [Source:ZFIN;Acc:ZDB-GENE-040426-1818]	-0.12716	-0.119286	0.0172048	-0.028557	0.0812884	-0.0774102	0.083043	0.188728	-0.15363	0.187129	-0.135399	-0.0108948	0.0625288	-0.162596	0.0368438	-0.043629
ENSDARG00000038027	NOL12	nucleolar protein 12 [Source:ZFIN;Acc:ZDB-GENE-040426-1035]	0.389582	0.231282	0.131119	0.161692	0.186426	0.313439	0.234874	0.0575963	0.217902	0.186911	0.438532	0.147547	0.211229	0.162081	0.255626	0.237009
ENSDARG00000074306	CTSLB	cathepsin Lb [Source:ZFIN;Acc:ZDB-GENE-980526-285]	0.291425	0.0120887	-0.392349	-0.0652094	-0.202591	0.259525	-0.138604	-0.0727368	-0.038049	0.186843	0.0996001	-0.0871611	0.1793	0.0706793	0.164414	-0.130992
ENSDARG00000095057	SI:DKEY-103D23.3	si:dkey-103d23.3 [Source:ZFIN;Acc:ZDB-GENE-081104-522]	0.155381	0.160733	0.106272	0.259373	0.174641	0.209202	0.115096	-0.00779797	0.139537	0.186462	0.0246929	0.129994	0.0233264	0.160325	0.447899	0.0623619
ENSDARG00000099306	ZGC:175088	zgc:175088 [Source:ZFIN;Acc:ZDB-GENE-080204-124]	0.0197285	0.172903	0.144721	0.036544	0.254388	0.0196124	0.19901	0.342455	0.0467251	0.186217	-0.195346	0.0451539	0.0262794	-0.218802	0.101609	0.0883381
ENSDARG00000107353	BX957322.3	N/A	-0.501859	0.024486	0.108662	0.0300044	0.195093	-0.382812	0.204067	0.138162	-0.597989	0.186174	-0.0159186	0.0489839	-0.0449905	-0.137099	0.0199039	0.0579492
ENSDARG00000045015	CYP27B1	cytochrome P450, family 27, subfamily B, polypeptide 1 [Source:ZFIN;Acc:ZDB-GENE-111005-2]	-0.099674	0.067601	0.354064	-0.104589	0.503047	-0.0232572	0.551237	0.296749	-0.235528	0.18583	-0.0238898	-0.142899	0.134952	0.0773456	0.136465	0.0692346
ENSDARG00000101248	CR749742.1	N/A	0.163216	0.338694	0.354158	0.248253	0.181152	0.0902242	0.136762	0.214788	0.133729	0.185565	0.224062	0.181755	0.167777	0.0893928	0.359225	0.0785444
ENSDARG00000093082	CABZ01059412.1	N/A	0.120293	0.121793	0.0656061	0.110701	0.0510356	0.0915142	0.0688482	0.0391791	0.0206443	0.185545	0.103902	0.0804106	-0.00688472	-0.0288468	0.0180585	0.0958261
ENSDARG00000058731	SLC2A6	solute carrier family 2 (facilitated glucose transporter), member 6 [Source:ZFIN;Acc:ZDB-GENE-081104-301]	0.426746	0.43506	0.264767	0.255701	0.268534	0.51027	0.27925	0.214726	0.204404	0.185505	0.49196	0.217394	0.29478	0.286708	0.439375	0.426296
ENSDARG00000056248	SI:DKEY-183I3.5	si:dkey-183i3.5 [Source:ZFIN;Acc:ZDB-GENE-030131-8568]	-0.438933	0.0562068	0.0292416	-0.0152718	0.114999	-0.0912009	0.376221	0.347886	-0.409973	0.185448	-0.257015	0.0560374	-0.141865	-0.0754877	-0.0905772	-0.0602083
ENSDARG00000063344	FAM162A	family with sequence similarity 162, member A [Source:ZFIN;Acc:ZDB-GENE-030131-8307]	-0.0250906	0.184723	0.0692758	0.0904408	0.153144	0.136503	0.0589388	0.0907828	0.0102976	0.185386	0.0825467	-0.00153791	0.180093	-0.174081	0.0153378	-0.0653593
ENSDARG00000037843	TOR4AA	torsin family 4, member Aa [Source:ZFIN;Acc:ZDB-GENE-050417-9]	-0.0130015	0.252201	-0.0287296	0.0959077	0.126396	0.258814	0.161162	0.00253278	0.0848311	0.184945	0.0642564	-0.134215	0.135837	0.0259531	-0.0210554	0.0680889
ENSDARG00000040008	NEUROD6A	neuronal differentiation 6a [Source:ZFIN;Acc:ZDB-GENE-010608-1]	-0.39979	-0.0785745	0.159659	-0.0121306	0.0964209	-0.231757	0.0865654	0.1831	-0.560009	0.184704	-0.0518928	-0.000295723	0.0948546	-0.30396	-0.0122429	-0.0467971
ENSDARG00000052958	NPPB	natriuretic peptide B [Source:ZFIN;Acc:ZDB-GENE-130530-642]	0.0843536	-0.0471361	0.0430285	0.104932	-0.182912	0.10129	-0.0265331	-0.0831474	-0.217225	0.184538	0.021454	0.164698	0.135845	0.086725	0.0139308	0.10072
ENSDARG00000091540	NOTUM1B	notum pectinacetylesterase homolog 1b (Drosophila) [Source:ZFIN;Acc:ZDB-GENE-040718-391]	0.0283946	0.223621	0.198004	-0.0913809	0.0497595	0.079255	-0.0455635	0.15595	0.171242	0.184367	0.0173113	-0.102707	0.161658	-0.0409416	0.116859	-0.00690307
ENSDARG00000055118	MYLIPB	myosin regulatory light chain interacting protein b [Source:ZFIN;Acc:ZDB-GENE-061027-67]	0.0392682	0.15221	0.164879	0.0659371	0.135735	-0.0266658	0.428587	0.123489	0.017574	0.184098	0.161319	0.0390538	0.263755	0.018599	0.173605	0.0376064
ENSDARG00000075527	SI:DKEY-239J18.2	si:dkey-239j18.2 [Source:ZFIN;Acc:ZDB-GENE-121214-52]	0.494002	0.224894	-0.0353032	0.185412	0.0289479	0.26634	-0.0559081	0.00537416	0.138813	0.184034	0.140179	-0.126975	0.156084	0.199552	0.20534	0.0256978
ENSDARG00000019122	HE1B	hatching enzyme 1b [Source:ZFIN;Acc:ZDB-GENE-030131-2100]	0.281562	0.216583	-0.220652	0.0647371	0.0188738	0.375332	-0.13308	0.101727	0.141655	0.184006	0.155585	0.0440395	0.0818907	0.0608147	0.240876	-0.0356486
ENSDARG00000100547	CR383680.1	N/A	-0.0177217	-0.156342	0.0438124	0.181574	0.0185459	-0.0823993	0.106457	-0.0120202	0.0833713	0.183581	0.0477619	0.116075	-0.0142999	0.231198	-0.0388787	0.149163
ENSDARG00000092920	SI:CH211-106H4.12	si:ch211-106h4.12 [Source:ZFIN;Acc:ZDB-GENE-070705-12]	-0.0952292	0.0301262	0.0633023	0.0286591	0.0241832	0.0197419	0.266881	0.115211	-0.0525563	0.183441	-0.016672	-0.0635251	0.0637591	0.0931744	-0.12603	0.0691937
ENSDARG00000070864	BCL6A	B-cell CLL/lymphoma 6a (zinc finger protein 51) [Source:ZFIN;Acc:ZDB-GENE-040426-1696]	-0.14562	-0.0271005	0.0576876	-0.0591326	0.096084	-0.217043	0.28739	0.0963668	-0.378257	0.183252	-0.17297	-0.0227271	0.0650692	-0.0346709	0.038891	-0.0301166
ENSDARG00000060682	AGR1	anterior gradient 1 [Source:ZFIN;Acc:ZDB-GENE-030131-7249]	-0.0786994	-0.0854844	-0.229696	-0.153269	0.049438	0.142248	0.0722635	0.179938	0.277263	0.183247	0.147338	0.0458519	0.099149	-0.148605	0.253851	-0.0911522
ENSDARG00000096065	SI:DKEY-156K2.7	si:dkey-156k2.7 [Source:ZFIN;Acc:ZDB-GENE-110914-110]	0.129502	0.116052	0.0206445	0.184482	0.0572081	0.0519521	0.0831481	0.109547	0.0421614	0.183204	0.165201	0.0919973	0.0992604	0.0866478	0.21763	0.0750743
ENSDARG00000097613	IGFN1.3	immunoglobulin-like and fibronectin type III domain containing 1, tandem duplicate 3 [Source:ZFIN;Acc:ZDB-GENE-131122-44]	-0.609046	-0.00641953	0.28069	-0.200029	0.331867	-0.717632	0.326017	0.197394	-0.599303	0.183146	0.00702387	-0.0127586	-0.000511758	-0.229372	-0.102385	-0.0835695
ENSDARG00000103498	EPD	ependymin [Source:ZFIN;Acc:ZDB-GENE-980526-111]	-0.324595	-0.362934	0.12845	-0.14976	0.0558658	-0.0769961	0.0594837	0.159764	-0.247369	0.183085	-0.31845	0.0372588	-0.110991	-0.068246	-0.268572	-0.0783376
ENSDARG00000100624	CABZ01066312.1	N/A	0.0316782	0.148438	0.116435	0.0796994	0.104529	0.0977604	0.222284	0.251527	-0.00288301	0.182874	0.228489	-0.0411797	0.392611	0.148826	0.0963082	0.162266
ENSDARG00000100781	COL28A1	collagen type XXVIII alpha 1 chain [Source:HGNC Symbol;Acc:HGNC:22442]	-0.00340427	-0.0638136	-0.147163	0.0144152	-0.0815956	-0.335345	0.236162	-0.0433743	-0.359322	0.182764	0.0275012	0.193393	-0.0680499	0.020167	-0.175124	0.0468329
ENSDARG00000103471	SI:DKEY-199M13.4	si:dkey-199m13.4 [Source:ZFIN;Acc:ZDB-GENE-110913-41]	-0.00991705	0.112613	0.0764809	-0.000856595	0.0322317	0.136954	0.180719	0.158346	0.0794075	0.182708	0.078741	0.219811	0.0674498	0.0953794	0.170016	0.0801087
ENSDARG00000103265	SI:CH211-223G7.2	si:ch211-223g7.2 [Source:ZFIN;Acc:ZDB-GENE-050420-153]	0.122291	0.178231	0.142762	0.142091	0.18092	0.0920339	0.215474	0.116636	0.0117992	0.1827	0.165146	0.200974	0.0669332	0.106425	0.155056	0.0935325
ENSDARG00000006427	FABP2	fatty acid binding protein 2, intestinal [Source:ZFIN;Acc:ZDB-GENE-991019-5]	0.36713	-0.0180634	-0.0349043	-0.0326713	-0.0941051	0.428835	0.0641268	0.10689	0.300762	0.182238	-0.10431	-0.0434585	0.0498984	-0.206706	0.212085	-0.206015
ENSDARG00000093365	SI:CH211-226H7.3	si:ch211-226h7.3 [Source:ZFIN;Acc:ZDB-GENE-130531-9]	0.297633	0.123204	0.298715	0.12295	0.1392	0.0982494	0.033436	0.0748578	0.0518907	0.182213	0.129662	0.0297338	0.0429664	0.108986	0.0631426	0.11433
ENSDARG00000020086	NUAK1A	NUAK family, SNF1-like kinase, 1a [Source:ZFIN;Acc:ZDB-GENE-041210-122]	0.277232	0.228749	0.677518	-0.121078	0.589526	0.0709058	0.319382	0.12935	0.157477	0.18219	0.194608	-0.0821775	0.0727368	0.112364	0.0691519	0.193786
ENSDARG00000092903	ZGC:153317	zgc:153317 [Source:ZFIN;Acc:ZDB-GENE-060825-309]	0.0722821	0.15614	0.27471	0.169747	0.150552	-0.0552558	0.247324	0.220733	0.0710745	0.181878	0.199505	-0.0202859	0.108635	-0.0197841	0.0654339	-0.0204803
ENSDARG00000088083	SIK3	SIK family kinase 3 [Source:ZFIN;Acc:ZDB-GENE-140106-203]	0.0639352	0.160089	-0.118887	0.11633	0.332832	0.192157	0.150446	0.24259	0.28484	0.181868	0.184729	0.0756851	0.13108	-0.0496728	0.0222502	0.159665
ENSDARG00000060655	BX005421.3	N/A	-0.156874	0.0853843	0.116023	-0.079777	0.180271	0.0371537	0.0586381	0.00170595	-0.114243	0.181862	0.0434602	0.00254415	-0.0152711	-0.117268	0.0268538	-0.176835
ENSDARG00000059387	FGF7	fibroblast growth factor 7 [Source:ZFIN;Acc:ZDB-GENE-080122-1]	0.0332964	0.783166	0.526142	-0.102257	0.402453	-0.0471535	0.0149841	-0.0168424	-0.0196454	0.181671	-0.101879	-0.0825938	0.011738	-0.0486371	-0.134661	-0.0284568
ENSDARG00000100074	ZNF994	zinc finger protein 994 [Source:ZFIN;Acc:ZDB-GENE-110913-145]	0.20174	-0.0182194	-0.0525825	0.0523157	0.0243153	0.0635326	-0.0376668	0.143307	0.00292554	0.181574	-0.0136606	0.109559	0.0272456	0.0386299	0.0893449	-0.111034
ENSDARG00000103588	PRRT2	proline-rich transmembrane protein 2 [Source:ZFIN;Acc:ZDB-GENE-121210-3]	-0.261688	0.111785	0.265493	-0.113004	0.225351	-0.197181	0.139222	0.0720039	-0.278913	0.181494	0.26624	-0.00100672	0.292602	0.159364	0.0231192	0.117347
ENSDARG00000019763	ACP5A	acid phosphatase 5a, tartrate resistant [Source:ZFIN;Acc:ZDB-GENE-040426-2864]	0.317234	0.110515	0.345684	0.0391849	0.489927	0.475901	0.358234	0.452023	0.132005	0.181339	0.0529217	-0.122274	-0.0576076	-0.00648486	-0.0681811	0.0668273
ENSDARG00000056277	OR132-5	odorant receptor, family H, subfamily 132, member 5 [Source:ZFIN;Acc:ZDB-GENE-070806-21]	-0.0601497	-0.0530392	0.0283698	-0.0368935	0.120514	0.0135867	0.141814	-0.00192508	-0.220622	0.181034	0.0478912	-0.0656004	-0.0567598	-0.0544488	-0.00494035	0.0786018
ENSDARG00000104724	CABZ01087502.1	N/A	0.00647811	0.0426342	0.0294488	0.0115017	0.187688	0.0396457	0.0371021	0.0645279	0.0700405	0.18068	0.0581762	0.132561	0.100923	0.0118799	0.0273974	0.112777
ENSDARG00000058873	PTPDC1B	protein tyrosine phosphatase domain containing 1b [Source:ZFIN;Acc:ZDB-GENE-090312-138]	0.135304	0.221091	0.207501	0.0996186	0.0338245	0.28695	0.103601	-0.0128763	0.209644	0.180581	0.143487	0.193444	0.123439	0.105413	0.181301	0.109516
ENSDARG00000040004	PKHD1L1	si:ch211-244a23.1 [Source:ZFIN;Acc:ZDB-GENE-060503-789]	0.143432	0.267671	0.474615	-0.0299678	0.460056	0.0692339	0.457252	0.129397	-0.0155575	0.18052	0.0278955	0.103818	-0.0287707	0.171839	0.136461	0.268307
ENSDARG00000036876	ZGC:153284	zgc:153284 [Source:ZFIN;Acc:ZDB-GENE-060825-317]	0.0590523	0.0714197	-0.0696147	-0.0482375	-0.0727041	0.0168148	0.157438	0.143262	0.0428171	0.180152	0.0365999	0.0892477	0.189236	0.00964712	0.191549	-0.151668
ENSDARG00000087597	SI:DKEY-51D8.3	si:dkey-51d8.3 [Source:ZFIN;Acc:ZDB-GENE-081103-8]	0.177096	0.103404	0.0561847	-0.00202269	0.164131	0.0231632	0.125381	0.0854495	-0.107576	0.180131	0.174501	0.123219	0.158684	0.0890738	0.0164975	0.00115593
ENSDARG00000031664	SOX21A	SRY (sex determining region Y)-box 21a [Source:ZFIN;Acc:ZDB-GENE-990715-6]	0.0976748	-0.0169618	-0.00717752	-0.0417578	0.005067	-0.0294652	-0.00520029	-0.0218006	0.360934	0.179746	-0.0475451	0.00505246	0.0297935	0.207025	-0.0281969	-0.130849
ENSDARG00000087164	CRYGM2D4	crystallin, gamma M2d4 [Source:ZFIN;Acc:ZDB-GENE-060918-3]	-0.27346	-0.149952	-0.141293	-0.111584	0.118585	0.0409666	0.0453763	0.0121308	0.0191296	0.179666	-0.0878266	0.0103577	-0.0779002	-0.223327	-0.00576069	-0.0960737
ENSDARG00000109109	FO393424.4	N/A	0.0573795	-0.0363745	0.0552053	0.0192407	-0.0192681	0.052135	-0.0497339	-0.0249691	0.0767448	0.179508	-0.0468599	-0.0925801	-0.0388783	-0.0583694	0.0457245	-0.0562881
ENSDARG00000063089	CCM2L	cerebral cavernous malformation 2-like [Source:ZFIN;Acc:ZDB-GENE-090313-248]	-0.237457	0.229876	0.25451	-0.111209	0.121446	-0.0510919	0.324539	-0.0458665	-0.0726715	0.178917	0.157289	-0.132627	0.212487	-0.0961049	0.120794	0.0573194
ENSDARG00000069826	CRYGM2D15	crystallin, gamma M2d15 [Source:ZFIN;Acc:ZDB-GENE-040718-322]	-0.270268	0.0149204	0.0237975	-0.199921	0.113758	0.0246461	0.171577	0.181788	0.019663	0.178549	-0.0586988	0.0225867	0.0529685	-0.206587	-0.0124343	0.0110619
ENSDARG00000088762	SI:CH211-224L10.4	si:ch211-224l10.4 [Source:ZFIN;Acc:ZDB-GENE-090312-125]	0.084666	-0.0370422	0.101366	-0.0953814	-0.161427	-0.0938709	-0.171901	0.151258	-0.214553	0.178406	-0.0936308	-0.0985916	-0.0267922	-0.168642	-0.206384	0.117273
ENSDARG00000058246	CYSLTR1	cysteinyl leukotriene receptor 1 [Source:ZFIN;Acc:ZDB-GENE-050522-250]	0.100328	0.170288	0.220116	0.0287662	0.137562	-0.0404173	0.382737	0.111262	0.0618847	0.178015	0.171773	0.0419669	0.146309	-0.0461213	0.131618	0.0388511
ENSDARG00000026787	AQP7	aquaporin 7 [Source:ZFIN;Acc:ZDB-GENE-030131-6461]	0.0038184	-0.00283993	0.0875193	0.0982445	0.0939255	-0.0620235	0.103307	0.076756	0.0136715	0.177805	-0.188066	0.378062	-0.0890813	0.272198	0.0287009	0.16646
ENSDARG00000059824	SOAT2	sterol O-acyltransferase 2 [Source:ZFIN;Acc:ZDB-GENE-061013-742]	-0.0494965	0.0280295	0.0287859	-0.0374545	0.0511695	0.0279236	-0.0218618	0.0484315	0.0333654	0.17739	0.149125	-0.128197	0.0649453	-0.0876182	-0.0161927	-0.125352
ENSDARG00000093936	SI:DKEYP-1H4.6	si:dkeyp-1h4.6 [Source:ZFIN;Acc:ZDB-GENE-060503-841]	0.191093	0.651412	-0.00429879	-0.127249	-0.242743	-0.351674	0.176174	0.112277	0.145267	0.17707	-0.00717648	0.07551	0.144524	-0.151176	0.357279	-0.0337884
ENSDARG00000096310	WU:FJ64H06	wu:fj64h06 [Source:ZFIN;Acc:ZDB-GENE-030131-8286]	0.208669	-0.049347	-0.0958483	0.0673852	0.0415122	0.164276	0.0190612	-0.13015	0.11128	0.176962	0.0214854	0.00746564	0.244982	0.0623118	0.0448477	0.0146502
ENSDARG00000007655	CRYBB1L3	crystallin, beta B1, like 3 [Source:ZFIN;Acc:ZDB-GENE-070820-11]	0.394371	-0.149823	0.171836	0.13563	0.417836	0.221513	0.214154	0.29889	0.22587	0.176546	0.246653	0.104773	0.199112	0.136189	0.0361991	0.142643
ENSDARG00000095944	FP102797.1	N/A	0.000796626	0.0485527	-0.0208396	-0.0170828	-0.0227295	-0.0643632	0.0607219	0.0307727	0.045264	0.176354	0.0853297	0.0178316	0.0968265	0.00821578	0.0668112	-0.116945
ENSDARG00000055253	SLC12A10.3	slc12a10.3 solute carrier family 12 (sodium/potassium/chloride transporters), member 10, tandem duplicate 3 [Source:ZFIN;Acc:ZDB-GENE-060503-518]	0.82018	0.967784	0.0778476	0.0966802	0.158148	0.612656	0.0685214	0.215914	0.506918	0.175727	0.458193	-0.0750412	0.280557	-0.0419682	0.235988	-2.19e-05
ENSDARG00000087249	ZNF1011	zinc finger protein 1011 [Source:ZFIN;Acc:ZDB-GENE-131120-89]	0.110491	0.137174	0.12148	-0.0190364	0.106605	-0.0991049	0.0480312	0.0834932	0.117482	0.175551	0.122553	0.146044	0.137871	0.0384992	0.134593	0.0579993
ENSDARG00000104138	IGFBP7	insulin-like growth factor binding protein 7 [Source:ZFIN;Acc:ZDB-GENE-040426-2423]	-0.0360384	0.358788	0.496736	0.0212667	0.394583	-0.0968541	0.219445	0.326322	0.0528507	0.175286	-0.0725619	0.0277542	0.128417	0.0499394	-0.0504889	0.0732244
ENSDARG00000095665	SI:CH211-191A16.2	si:ch211-191a16.2 [Source:ZFIN;Acc:ZDB-GENE-081028-45]	-0.180446	0.190748	0.0688975	-0.0672762	0.179797	-0.230469	0.140873	0.130515	-0.0533116	0.175221	0.0829742	-0.05364	-0.218416	-0.0217505	-0.119788	0.00412643
ENSDARG00000079375	CU104698.1	N/A	0.0624351	0.245849	0.102722	-0.141224	0.056038	0.123839	0.211071	0.128122	0.218887	0.175013	-0.0789531	0.0246899	0.0692308	0.0169648	0.295983	-0.0894363
ENSDARG00000104852	ZGC:174698	zgc:174698 [Source:ZFIN;Acc:ZDB-GENE-080204-74]	0.244715	0.154582	0.105641	0.172949	0.143797	0.0118139	0.165065	0.0941171	0.15542	0.174901	0.0619907	0.364349	0.119466	0.133361	0.218499	0.162177
ENSDARG00000099845	ZGC:174275	zgc:174275 [Source:ZFIN;Acc:ZDB-GENE-080305-5]	-0.0808175	0.0580263	0.0530491	-0.283236	-0.1413	-0.151122	0.0570798	0.0282825	-0.11094	0.174548	-0.0381995	-0.0483123	0.0339036	-0.0985163	-0.176123	0.057781
ENSDARG00000092521	JAC1	jacalin 1 [Source:ZFIN;Acc:ZDB-GENE-030131-8429]	-0.15219	-0.110255	-0.171053	-0.244119	-0.117531	-0.08192	-0.105245	-0.0565085	0.0490735	0.174088	-0.104546	-0.0964513	0.137336	-0.117628	0.141788	-0.24512
ENSDARG00000079783	ISG20	interferon stimulated exonuclease gene [Source:ZFIN;Acc:ZDB-GENE-100422-17]	0.0481141	-0.141865	-0.043066	-0.030723	-0.0852898	0.110174	-0.0748585	-0.0849665	0.0419968	0.174082	-0.115516	-0.0173338	0.128766	0.0995883	-0.0150257	-0.0527335
ENSDARG00000061101	SNX19A	sorting nexin 19a [Source:ZFIN;Acc:ZDB-GENE-060526-204]	-0.118562	0.0515253	0.0906988	-0.144881	0.0881152	-0.217474	0.100926	-0.0167612	-0.163937	0.174	0.0766451	0.00859247	0.077648	-0.0402368	-0.036089	0.0940765
ENSDARG00000077519	CR391923.1	N/A	0.0682856	0.223619	0.0858643	0.119415	0.0198962	0.345456	0.0769175	-0.0629979	-0.0149392	0.173936	0.236135	0.0944447	0.0561277	-0.0272667	0.186584	0.133732
ENSDARG00000104218	TGM1	transglutaminase 1 [Source:HGNC Symbol;Acc:HGNC:11777]	0.293776	0.335931	0.408821	0.117025	0.419422	0.13858	0.264924	0.285319	0.0852676	0.173771	0.31019	0.0525895	0.056081	0.0575753	0.268232	0.17458
ENSDARG00000036767	SI:DKEY-204A24.10	si:dkey-204a24.10 [Source:ZFIN;Acc:ZDB-GENE-120215-160]	-0.0674574	0.112675	0.878419	-0.0736876	0.503927	0.0301564	0.383005	0.240565	-0.025513	0.173113	-0.0469159	0.0578236	0.130493	0.0569391	-0.0544678	0.166112
ENSDARG00000076900	PROZB	protein Z, vitamin K-dependent plasma glycoprotein b [Source:ZFIN;Acc:ZDB-GENE-120816-1]	0.36262	0.436371	0.352501	0.130453	0.486669	0.152988	0.435133	0.404371	0.0837778	0.17269	0.216473	0.187277	0.270371	0.120727	0.187712	0.109407
ENSDARG00000099533	ZGC:113279	zgc:113279 [Source:ZFIN;Acc:ZDB-GENE-050522-529]	-0.254578	0.069374	0.54861	-0.165724	0.122874	-0.404808	0.465218	0.0340118	-0.0241548	0.172119	-0.180135	-0.183003	-0.0988457	0.0616838	-0.0262104	-0.0897057
ENSDARG00000089853	SI:DKEY-22N8.3	si:dkey-22n8.3 [Source:ZFIN;Acc:ZDB-GENE-110914-188]	0.116774	0.0295683	0.0726466	0.0845767	-0.0275575	0.0440635	-0.0176108	0.0289999	-0.178994	0.172009	0.0587278	0.100207	0.130118	0.00622601	0.155715	-0.0656059
ENSDARG00000092998	SI:CH211-202F5.3	si:ch211-202f5.3 [Source:ZFIN;Acc:ZDB-GENE-030131-1042]	0.0225421	0.00559824	0.0823523	-0.160005	0.0101344	0.0729939	0.0412555	0.151829	0.0665375	0.17179	-0.0977955	-0.0101034	-0.0271648	-0.0143914	0.151732	-0.0469818
ENSDARG00000012215	UMPS	uridine monophosphate synthetase [Source:ZFIN;Acc:ZDB-GENE-040426-785]	0.270961	0.0929872	0.0449305	0.142368	0.283454	0.384063	0.117237	0.127884	0.268666	0.171666	0.117156	0.115594	0.147268	-0.0730977	0.178735	0.0979896
ENSDARG00000075842	PIGT	phosphatidylinositol glycan anchor biosynthesis, class T [Source:ZFIN;Acc:ZDB-GENE-090313-46]	0.0515739	-0.0043067	0.0472324	-0.0902178	0.0536903	0.208118	0.0417826	0.0773236	0.17171	0.171529	0.0998625	0.0971512	-0.227605	-0.178554	0.137568	-0.0530772
ENSDARG00000034801	MYLKA	myosin, light chain kinase a [Source:ZFIN;Acc:ZDB-GENE-030131-8207]	-0.0833241	-0.0684158	0.0460865	-0.0473274	0.179169	-0.16656	0.15744	0.0244761	-0.170121	0.171333	0.141148	0.110368	0.072037	0.0970648	0.00815397	0.217602
ENSDARG00000095283	SI:DKEYP-2E4.3	si:dkeyp-2e4.3 [Source:ZFIN;Acc:ZDB-GENE-061009-48]	0.255243	0.0832204	0.150665	0.264601	0.0972799	0.262389	0.0566539	0.149027	0.35375	0.171266	0.276742	0.221913	0.147203	0.285282	0.0887018	0.242466
ENSDARG00000043093	MPEG1.2	macrophage expressed 1, tandem duplicate 2 [Source:ZFIN;Acc:ZDB-GENE-050522-305]	0.297122	0.351506	-0.0126817	0.0868458	0.154143	0.460566	0.00655396	0.169865	0.0425506	0.170968	0.114478	-0.0157026	-0.0416727	-0.0108678	0.0771963	0.0278654
ENSDARG00000102642	ZNF1139	zinc finger protein 1139 [Source:ZFIN;Acc:ZDB-GENE-120214-40]	0.103523	0.11923	0.109293	0.0416094	0.135258	0.0767773	0.0607831	0.0730685	0.0820796	0.170727	0.0767686	0.0596774	0.167698	0.0711146	0.066857	0.0974317
ENSDARG00000100746	NFR	notochord formation related [Source:ZFIN;Acc:ZDB-GENE-100715-1]	0.0539908	0.0606483	0.122382	-0.0298639	0.0710845	-0.0391206	0.0599464	0.138889	0.0718742	0.170368	0.215175	-0.0722691	-0.0315713	-0.1463	0.120663	0.159767
ENSDARG00000095651	HMX1	H6 family homeobox 1 [Source:ZFIN;Acc:ZDB-GENE-080204-54]	-0.14739	-0.0766226	0.117577	-0.0525881	0.191705	0.0105053	-0.0466774	0.0446405	-0.0795913	0.169778	-0.0350075	0.0736702	-0.141676	-0.0762689	-0.163765	0.0167613
ENSDARG00000058206	SI:CH211-153B23.5	si:ch211-153b23.5 [Source:ZFIN;Acc:ZDB-GENE-030131-9744]	0.173763	0.0358802	0.0386251	-0.148	-0.0463003	0.12949	0.0192412	0.092387	-0.0436735	0.169083	0.0191671	0.0387247	-0.0431785	-0.0157384	0.0268098	-0.00698377
ENSDARG00000061762	TRIM108	tripartite motif containing 108 [Source:ZFIN;Acc:ZDB-GENE-060503-670]	0.189438	0.0666362	0.00538851	0.0664689	0.18449	0.0558739	0.223646	0.0543087	0.15443	0.16902	0.130884	0.00234637	0.092495	0.0140229	0.23137	0.0910966
ENSDARG00000041623	MT2	metallothionein 2 [Source:ZFIN;Acc:ZDB-GENE-030131-4174]	-0.111711	0.489799	0.2455	0.0829991	0.142321	0.571685	0.121084	0.115423	0.361493	0.169014	0.0917197	0.160061	-0.0294962	0.17643	0.288394	0.0466914
ENSDARG00000088202	SH3D19	SH3 domain containing 19 [Source:ZFIN;Acc:ZDB-GENE-050522-481]	0.120942	0.353765	0.0709254	0.0996762	0.326026	0.207686	0.220737	0.248061	0.0343379	0.168961	0.320795	0.101476	0.113727	0.127239	0.0848345	0.272065
ENSDARG00000079402	TAPBP.1	TAP binding protein (tapasin), tandem duplicate 1 [Source:ZFIN;Acc:ZDB-GENE-010110-2]	0.375485	0.125052	0.286736	0.24781	0.269486	0.32983	0.247869	0.260256	0.154266	0.168728	0.293967	0.40003	0.110679	0.174961	0.131234	0.158921
ENSDARG00000028012	TPMT.2	thiopurine S-methyltransferase, tandem duplicate 2 [Source:ZFIN;Acc:ZDB-GENE-041010-177]	0.118133	0.641107	0.359248	-0.00815235	0.608429	-0.225556	0.17372	0.114494	0.0840938	0.168224	-0.0754076	-0.14292	-0.0288258	-0.101769	-0.139973	-0.114133
ENSDARG00000019492	SHBG	sex hormone-binding globulin [Source:ZFIN;Acc:ZDB-GENE-030131-1324]	-0.0221708	0.293488	0.173549	0.0080264	0.170261	-0.0248803	-0.0204702	-0.0185764	-0.0376163	0.167927	-0.0334225	-0.0183369	0.0803834	-0.017332	-0.00559738	0.0525788
ENSDARG00000052982	GABRR2A	gamma-aminobutyric acid (GABA) A receptor, rho 2a [Source:ZFIN;Acc:ZDB-GENE-060825-164]	-0.0161802	0.182278	0.153685	0.0588992	0.153388	0.110108	0.135554	0.15606	0.0178272	0.167811	-0.0260417	0.224835	0.0514378	0.317697	-0.00360871	0.170713
ENSDARG00000100099	SI:CH211-263L8.1	si:ch211-263l8.1 [Source:ZFIN;Acc:ZDB-GENE-120703-29]	0.139023	0.162124	0.122783	0.0785166	0.112639	0.139294	0.109262	0.187605	0.139154	0.167721	0.148329	0.060399	0.0948376	0.0935478	0.110126	0.0878383
ENSDARG00000042357	CLDNK	claudin k [Source:ZFIN;Acc:ZDB-GENE-040801-201]	0.0538046	0.186128	0.167443	-0.0417819	0.254735	0.0200536	0.173436	0.0163944	0.00876287	0.167663	-0.13532	-0.022101	-0.0381764	0.124997	0.0570524	0.140239
ENSDARG00000038768	MRPL12	mitochondrial ribosomal protein L12 [Source:ZFIN;Acc:ZDB-GENE-050417-187]	0.0760782	-0.0484267	0.0186201	-0.110436	0.0227772	0.254287	0.12181	-0.0487664	0.211523	0.167358	0.0970902	0.100306	0.034764	0.0581823	0.129305	0.0255022
ENSDARG00000042428	GSTT1A	glutathione S-transferase theta 1a [Source:ZFIN;Acc:ZDB-GENE-031001-13]	0.00785605	0.197742	0.340141	0.131821	0.117327	0.0712088	0.0638703	0.224336	-0.0127874	0.167239	-0.050584	0.00802334	0.0746334	0.0811767	-0.0863699	0.0508322
ENSDARG00000073707	CNKSR2B	connector enhancer of kinase suppressor of Ras 2b [Source:ZFIN;Acc:ZDB-GENE-030131-8048]	-0.0563643	0.0138178	0.156448	0.0546795	0.133003	-0.0474443	0.242937	0.20288	-0.159216	0.167139	0.0960479	0.105244	0.0860752	0.107172	-0.13063	0.270182
ENSDARG00000095897	ATP5E	ATP synthase, H+ transporting, mitochondrial F1 complex, epsilon subunit [Source:ZFIN;Acc:ZDB-GENE-110411-22]	0.0844116	0.0358185	-0.0493186	-0.064973	-0.0230376	0.179644	0.0295636	-0.113462	0.225947	0.167112	0.0227474	0.080263	-0.0754853	0.0208542	0.0933449	0.00376364
ENSDARG00000095147	KRT96	keratin 96 [Source:ZFIN;Acc:ZDB-GENE-030131-221]	-0.00657924	-0.035554	-0.142179	-0.194535	-0.0400527	0.238436	-0.0305039	0.169629	0.0625537	0.166995	0.0353804	0.224571	0.149425	-0.0589151	0.154793	0.12636
ENSDARG00000107106	CABZ01034089.2	N/A	0.0101795	0.0353813	0.0605135	0.0370504	0.0146305	0.0694162	0.0961657	0.0181676	-0.00970703	0.166767	0.291226	0.0457052	0.181869	0.067927	-0.0401885	0.0245818
ENSDARG00000037116	CXCL12A	chemokine (C-X-C motif) ligand 12a (stromal cell-derived factor 1) [Source:ZFIN;Acc:ZDB-GENE-030318-1]	0.343266	-0.0958671	0.255422	-0.101073	0.0425556	0.177528	0.283952	0.185015	-0.0236779	0.166722	0.206476	0.131218	0.212655	0.295838	0.193895	0.149463
ENSDARG00000003526	PSMA5	proteasome subunit alpha 5 [Source:ZFIN;Acc:ZDB-GENE-040625-96]	0.104366	0.16403	0.119684	-0.077089	0.0419469	0.126236	0.0670056	0.184728	0.247881	0.166642	-0.0917081	0.0561768	0.123843	-0.0300819	0.236554	-0.0122671
ENSDARG00000043483	OTX5	orthodenticle homolog 5 [Source:ZFIN;Acc:ZDB-GENE-030508-1]	-0.525969	-0.143741	0.051477	-0.221681	0.0916713	-0.509683	0.024203	0.104399	-0.184444	0.166121	-0.0234862	0.111531	-0.0681807	-0.0469248	-0.0894591	-0.0750671
ENSDARG00000107478	BX663613.2	N/A	0.0976968	0.115845	0.132621	0.107032	0.0377768	-0.0320642	0.218335	0.160446	0.047441	0.166091	0.125006	0.0648459	0.211334	0.0513493	0.105963	-0.0393553
ENSDARG00000058038	EML3	echinoderm microtubule associated protein like 3 [Source:ZFIN;Acc:ZDB-GENE-110304-3]	-0.173352	-0.101445	0.253998	0.335543	0.306641	-0.115852	0.14716	0.109388	-0.0859631	0.165692	-0.0440537	0.13633	0.0191253	0.0782208	-0.03338	-0.00408278
ENSDARG00000103159	BX571760.1	N/A	0.313837	0.143664	0.0486625	0.0979748	0.0678719	0.0937587	0.170997	0.198471	-0.00743865	0.165339	0.0808965	0.00532414	0.179849	0.0534003	0.029588	-0.0171955
ENSDARG00000042469	NDUFA12	NADH dehydrogenase (ubiquinone) 1 alpha subcomplex, 12 [Source:ZFIN;Acc:ZDB-GENE-050828-1]	0.0472132	-0.0465124	-0.128468	-0.15664	-0.0786913	-0.0344541	-0.0606815	0.0657403	0.129111	0.164807	-0.104331	-0.00810926	-0.114064	-0.341214	0.0270509	-0.154023
ENSDARG00000099313	NAGA	N-acetylgalactosaminidase, alpha [Source:ZFIN;Acc:ZDB-GENE-051113-256]	0.486684	0.617329	0.0264432	0.0643892	0.272581	0.367942	0.0995176	0.171272	0.30171	0.164488	0.435445	-0.0188407	0.131222	-0.112061	0.128173	-0.0628722
ENSDARG00000091561	SI:DKEY-156K2.4	si:dkey-156k2.4 [Source:ZFIN;Acc:ZDB-GENE-110913-8]	0.0995582	0.282275	0.0710942	0.0730754	0.0753885	-0.0259935	0.193992	0.133804	-0.179624	0.164276	-0.046621	0.112869	0.203405	-0.0852299	-0.0879042	-0.0697881
ENSDARG00000062943	TACO1	translational activator of mitochondrially encoded cytochrome c oxidase I [Source:ZFIN;Acc:ZDB-GENE-070410-35]	0.0317098	0.27369	0.159638	0.0472085	0.164426	0.133069	0.179255	0.247318	0.159617	0.164195	0.03765	0.195665	-0.109151	0.142336	0.0693699	-0.0252633
ENSDARG00000071651	SI:DKEY-19A16.13	si:dkey-19a16.13 [Source:ZFIN;Acc:ZDB-GENE-110411-2]	0.260907	0.107186	0.144614	0.223469	0.110205	0.0425905	0.111618	0.0776713	0.241019	0.163875	0.240585	0.160352	0.271416	0.0976973	0.271939	0.235181
ENSDARG00000036359	RIOX2	ribosomal oxygenase 2 [Source:ZFIN;Acc:ZDB-GENE-040426-1283]	0.23966	0.0439632	0.0327731	0.275534	0.255581	0.440502	0.0968018	0.143464	0.256892	0.163529	0.101739	0.0176821	0.19535	0.225558	0.16688	0.268627
ENSDARG00000102241	ZGC:136410	zgc:136410 [Source:ZFIN;Acc:ZDB-GENE-060421-6071]	0.160584	-0.0159662	0.110349	0.223728	0.213665	0.204849	0.0618744	0.0287236	0.0940518	0.163401	0.193509	0.0972498	-0.145463	0.101776	-0.0963082	0.111805
ENSDARG00000044935	HPDB	4-hydroxyphenylpyruvate dioxygenase b [Source:ZFIN;Acc:ZDB-GENE-040808-62]	-0.43376	0.2616	-0.0804865	-0.320341	-0.0218454	-0.161771	0.00772905	-0.0907268	-0.31132	0.163395	-0.14647	-0.244445	-0.0389123	-0.103411	-0.182233	-0.291692
ENSDARG00000094210	ZGC:109934	zgc:109934 [Source:ZFIN;Acc:ZDB-GENE-050522-428]	0.160714	0.411831	0.0158977	0.213239	0.189523	-0.080153	0.0944951	-0.00241155	-0.148187	0.163272	-0.13182	-0.0430394	0.0262025	-0.0215389	-0.035117	-0.119628
ENSDARG00000004925	IMMP2L	inner mitochondrial membrane peptidase subunit 2 [Source:ZFIN;Acc:ZDB-GENE-040808-9]	0.0846306	0.139089	0.138556	0.0754966	0.10969	0.089932	0.0722123	0.275788	0.149545	0.163254	0.0902232	0.107206	0.0755564	0.0735823	0.198169	0.0378727
ENSDARG00000089179	SI:DKEY-16P6.1	si:dkey-16p6.1 [Source:ZFIN;Acc:ZDB-GENE-081103-43]	0.165544	0.0800924	-0.0547102	0.0613244	-0.0473119	-0.0342541	0.155842	0.0197473	-0.132331	0.163244	-0.168624	0.0596715	0.0882893	-0.0106223	0.0342232	0.0378376
ENSDARG00000012789	PLEK2	pleckstrin 2 [Source:ZFIN;Acc:ZDB-GENE-080219-2]	-0.327131	-0.087571	0.153724	0.132721	-0.0980295	-0.102897	0.281552	0.176453	-0.150234	0.162382	0.00627024	-0.033647	-0.080532	-0.00432447	0.0412021	-0.0798705
ENSDARG00000060350	APODA.2	apolipoprotein Da, duplicate 2 [Source:ZFIN;Acc:ZDB-GENE-070912-551]	0.0226635	0.109895	0.260473	0.136218	0.0853702	-0.00779577	0.211909	0.0156905	-0.0288763	0.162267	0.27679	0.126965	0.067548	0.147931	0.131201	0.103889
ENSDARG00000104113	ZGC:136767	zgc:136767 [Source:ZFIN;Acc:ZDB-GENE-060421-7499]	0.174716	0.092848	0.524897	0.466429	0.227277	0.0657548	0.0972669	0.2284	0.0964448	0.162081	0.107399	0.0632366	-0.0345952	0.0498908	0.125764	0.292403
ENSDARG00000090286	SERPINA1	serpin peptidase inhibitor, clade A (alpha-1 antiproteinase, antitrypsin), member 1 [Source:ZFIN;Acc:ZDB-GENE-030131-1421]	-0.0635523	0.199753	0.0573402	-0.0339718	0.0777276	0.323384	0.154747	0.187649	0.238783	0.162037	0.101995	0.0507495	0.0795827	-0.0815436	0.149873	0.00315645
ENSDARG00000094570	SI:CH211-226H7.2	si:ch211-226h7.2 [Source:ZFIN;Acc:ZDB-GENE-130531-8]	0.141959	-0.0389093	-0.0192527	0.264912	0.216943	0.326394	0.254933	0.159038	0.296147	0.161998	0.394189	-0.0158472	0.403614	0.250532	0.188137	0.253635
ENSDARG00000087096	CLDN4	claudin 4 [Source:HGNC Symbol;Acc:HGNC:2046]	0.00800009	0.0747884	0.0466712	0.059055	0.0408442	0.0968534	0.0187029	0.0614788	0.00836396	0.16189	-0.0261068	0.0145999	0.0746053	0.041517	0.0654735	0.0650283
ENSDARG00000100346	SI:CH211-194M7.4	si:ch211-194m7.4 [Source:ZFIN;Acc:ZDB-GENE-131125-83]	0.122675	0.209794	0.00527629	0.0792885	0.111905	0.17908	-0.0212841	0.088065	0.0325641	0.16173	0.146862	0.0675178	0.0912779	0.0245849	-0.00396082	0.0114232
ENSDARG00000034852	NT5C2L1	5'-nucleotidase, cytosolic II, like 1 [Source:ZFIN;Acc:ZDB-GENE-031006-8]	-0.104738	0.402876	0.2026	-0.0508076	0.145913	-0.0817076	0.142438	0.116206	-0.116575	0.161694	0.0469408	-0.134844	-0.158812	-0.0917591	-0.122534	-0.0830589
ENSDARG00000095136	SI:CH211-130M23.2	si:ch211-130m23.2 [Source:ZFIN;Acc:ZDB-GENE-060531-13]	0.132349	-0.0742164	0.268722	0.0757192	0.206736	0.0718034	0.072773	0.0936157	-0.0293843	0.161429	0.117466	0.0213321	0.0512266	0.0427784	-0.0965204	0.0171619
ENSDARG00000100461	CABZ01078737.1	N/A	0.185806	0.0381329	0.0352639	0.185194	0.0206831	-0.113672	0.10027	-0.0384619	0.253985	0.161321	0.285392	-0.0613476	0.155876	0.340536	0.0916724	0.294725
ENSDARG00000103016	SI:CH211-180M24.1	si:ch211-180m24.1 [Source:ZFIN;Acc:ZDB-GENE-131126-24]	0.00870464	0.00427428	0.136161	0.0205552	0.100224	-0.123731	-0.0775142	0.0455681	0.0220275	0.161199	0.0451296	-0.015153	-0.0378224	-0.144058	0.0600823	-0.137482
ENSDARG00000030357	ZGC:66313	zgc:66313 [Source:ZFIN;Acc:ZDB-GENE-040426-1606]	-0.181286	-0.0828577	-0.108703	0.00518391	-0.0696107	-0.108189	-0.016205	-0.00776455	-0.0236822	0.161115	-0.074354	0.022113	-0.0515114	-0.0884973	-0.273873	-0.12764
ENSDARG00000098986	BX548067.1	N/A	-0.0388342	0.288651	0.0439679	0.172899	-0.0756172	0.171536	0.0519489	0.159936	0.206726	0.161059	0.10216	0.114739	0.176776	0.146406	0.0311998	0.0363314
ENSDARG00000100782	F7	zgc:163025 [Source:ZFIN;Acc:ZDB-GENE-070424-102]	-0.199233	-0.101193	0.0101934	0.0839491	0.00612995	0.0498768	0.138121	0.104389	-0.455738	0.160904	0.229984	0.0810936	0.00648683	-0.16998	0.0290134	-0.0457564
ENSDARG00000086481	MOGAT3A	monoacylglycerol O-acyltransferase 3a [Source:ZFIN;Acc:ZDB-GENE-080305-11]	0.22793	0.168285	0.12508	0.38832	0.204041	0.313754	-0.111034	-0.000769152	-0.0384943	0.160869	0.420096	0.111213	0.285242	0.247739	0.164473	0.313456
ENSDARG00000040627	GRIK1B	glutamate receptor, ionotropic, kainate 1b [Source:ZFIN;Acc:ZDB-GENE-070821-1]	-0.385529	0.0850185	0.330055	0.104103	0.471033	-0.381444	0.156453	0.147874	-0.351184	0.160863	0.239761	-0.0359348	0.0643925	0.23595	0.0561965	0.00321458
ENSDARG00000058160	TNFAIP2B	tumor necrosis factor, alpha-induced protein 2b [Source:ZFIN;Acc:ZDB-GENE-081107-56]	0.213733	-0.0590136	0.179128	0.0225111	0.304823	0.260883	0.244681	0.09046	0.16143	0.160751	0.389934	0.0108376	0.290102	0.0508972	0.189913	0.164649
ENSDARG00000057108	SERPINE3	serpin peptidase inhibitor, clade E (nexin, plasminogen activator inhibitor type 1), member 3 [Source:ZFIN;Acc:ZDB-GENE-050309-223]	0.0559763	0.297511	0.170057	-0.00521256	-0.0745205	0.00938773	0.168374	0.209738	-0.131191	0.160303	-0.0698075	0.258419	0.353528	0.197239	0.0571809	0.0278173
ENSDARG00000001463	TDH2	L-threonine dehydrogenase 2 [Source:ZFIN;Acc:ZDB-GENE-070620-14]	-0.159684	-0.0225847	0.1624	-0.125778	0.0825716	0.0492498	0.10749	0.185024	-0.124518	0.160182	-0.160618	0.126811	0.131842	-0.0417628	0.0890468	-0.131724
ENSDARG00000100709	AGXT2	alanine--glyoxylate aminotransferase 2 [Source:ZFIN;Acc:ZDB-GENE-050913-100]	0.0959333	-0.209064	0.0373445	0.240273	0.00917409	0.0685049	0.020964	0.110554	0.0487833	0.160137	-0.196697	-0.0643266	-0.0250151	0.0690445	0.0166459	0.0968182
ENSDARG00000059039	CABZ01031753.1	N/A	0.106152	0.203814	0.128481	0.0944132	0.118262	0.158652	0.151744	0.185767	0.120946	0.160078	0.187184	0.08162	0.102418	0.091432	0.0578229	0.0862631
ENSDARG00000091269	SI:CH73-27E22.8	si:ch73-27e22.8 [Source:ZFIN;Acc:ZDB-GENE-100917-4]	0.164956	0.0888154	0.121527	-0.00288047	0.0145874	-0.000630798	0.0528647	0.0218509	0.167477	0.160015	0.0469475	0.0859773	0.000583367	-0.0624179	0.163297	0.0301537
ENSDARG00000029795	FAM213B	family with sequence similarity 213, member B [Source:ZFIN;Acc:ZDB-GENE-040426-2556]	-0.00266576	-0.0588872	-0.0630056	-0.154292	-0.143254	-0.136837	0.0172157	-0.00758609	-0.185295	0.159764	0.0548421	-0.0780073	0.0924565	0.023108	0.0038289	0.0138602
ENSDARG00000012126	ZGC:109965	zgc:109965 [Source:ZFIN;Acc:ZDB-GENE-050913-21]	-0.79933	-0.282548	0.0551947	-0.086149	-0.205496	-0.631021	0.103257	-0.0644024	-0.647682	0.159272	-0.0684817	-0.0446047	-0.0843235	-0.192746	-0.0941105	-0.0298887
ENSDARG00000022763	HPCAL1	hippocalcin-like 1 [Source:ZFIN;Acc:ZDB-GENE-040426-1242]	0.373434	0.155468	0.0699245	0.127604	-0.0271114	0.09615	0.111871	0.184397	-0.123657	0.159238	0.306109	0.0682538	0.170607	0.125458	0.068964	0.25627
ENSDARG00000041339	KRT18	zgc:92380 [Source:ZFIN;Acc:ZDB-GENE-040801-221]	-0.0950494	0.00467565	0.0625976	0.084865	0.293553	-0.0431472	0.106848	0.116818	-0.0637139	0.159013	-0.0929597	-0.0618385	0.0131689	-0.0559961	-0.0340016	-0.20362
ENSDARG00000045378	PI15A	peptidase inhibitor 15a [Source:ZFIN;Acc:ZDB-GENE-040724-135]	-0.0341084	0.0420865	0.258611	0.170859	0.218066	0.114669	0.2302	-0.1347	0.031341	0.159011	0.338666	0.0537788	0.0182454	0.163838	0.123976	0.083977
ENSDARG00000040535	CSGALNACT1	chondroitin sulfate N-acetylgalactosaminyltransferase 1 [Source:HGNC Symbol;Acc:HGNC:24290]	-0.213849	-0.152157	0.0728841	-0.129008	-0.0838789	-0.253421	0.208289	0.182499	-0.263436	0.15901	-0.101114	-0.0439804	0.108481	-0.0441105	-0.0242854	-0.0476096
ENSDARG00000016391	CALCOCO1B	calcium binding and coiled-coil domain 1b [Source:ZFIN;Acc:ZDB-GENE-031118-126]	0.164548	0.206077	0.232837	0.00751868	-0.0162159	0.211006	0.127665	0.125643	0.178322	0.158777	-0.00624364	-0.0313122	0.192308	0.176001	0.0415245	-0.0167169
ENSDARG00000099442	CABZ01058031.1	N/A	0.12081	0.324752	0.166618	-0.0634321	0.398513	0.124168	0.147715	0.219297	0.142119	0.158723	0.14044	0.154075	0.149661	0.179283	-0.034679	0.070224
ENSDARG00000061885	SATB2	SATB homeobox 2 [Source:ZFIN;Acc:ZDB-GENE-070912-212]	-0.314838	0.00260604	0.187163	-0.0686605	0.0799669	-0.376138	0.240369	0.116059	-0.309052	0.158552	0.0853986	-0.0356248	0.0479197	0.0416806	-0.0636241	0.143368
ENSDARG00000058299	FUT9	zgc:173737 [Source:ZFIN;Acc:ZDB-GENE-071004-109]	0.115668	0.138927	0.110549	0.164041	0.105435	0.0793671	0.108297	0.137796	-0.00534805	0.158536	0.0404125	0.0113346	0.119289	0.069153	0.0680487	0.121164
ENSDARG00000102939	BX957234.1	N/A	0.265745	0.0645432	0.100738	0.288503	0.0524364	0.199124	0.0614504	0.260112	0.171771	0.158315	0.183168	0.108846	0.135433	0.193649	0.178782	0.0991533
ENSDARG00000078832	SI:DKEY-73P2.3	si:dkey-73p2.3 [Source:ZFIN;Acc:ZDB-GENE-131126-12]	0.28985	0.143604	0.123272	0.232832	0.0990389	-0.0160402	-0.0483635	0.00908597	0.0160377	0.158244	0.0452882	0.101385	0.0812067	0.112491	0.124821	0.26105
ENSDARG00000099760	CT573263.1	N/A	-0.00740014	-0.0273359	0.0297972	-0.0442661	0.0305948	-0.128906	0.177608	0.179365	-0.155773	0.158064	0.00923946	0.0974291	0.0599047	0.0188649	-0.116935	-0.124073
ENSDARG00000092419	VTG7	vitellogenin 7 [Source:ZFIN;Acc:ZDB-GENE-001201-6]	0.0424335	0.254514	0.123107	0.043527	0.0869821	-0.0516585	0.220436	0.162222	0.0254828	0.157989	0.0501818	0.0653906	0.137653	0.0679075	0.13388	0.103463
ENSDARG00000077906	RNF165A	ring finger protein 165a [Source:ZFIN;Acc:ZDB-GENE-091118-64]	0.133199	0.0403363	-0.105878	0.0139146	-0.250021	-0.131106	-0.136094	-0.138465	0.161175	0.157956	-0.0410097	0.0535193	0.00290421	0.225557	-0.00145603	0.134149
ENSDARG00000067717	TOMM7	translocase of outer mitochondrial membrane 7 homolog (yeast) [Source:ZFIN;Acc:ZDB-GENE-060825-115]	0.06008	0.0779023	0.0179406	0.075112	0.0981302	0.129207	0.0433094	0.054015	0.0755181	0.157797	0.0966486	0.0732675	-0.0108578	0.18981	0.0819081	-0.153562
ENSDARG00000038577	COX6C	cytochrome c oxidase subunit VIc [Source:ZFIN;Acc:ZDB-GENE-040724-95]	0.0765167	0.0650792	0.152878	0.175964	0.261468	0.166175	0.0606447	0.0425627	0.0634228	0.1577	0.291049	0.147557	0.171105	0.250647	0.0361241	0.161931
ENSDARG00000032037	BET1L	Bet1 golgi vesicular membrane trafficking protein-like [Source:ZFIN;Acc:ZDB-GENE-040822-2]	0.0565145	0.0980279	0.0327262	-0.107951	0.130911	0.112039	0.181643	0.0314163	0.0410445	0.157381	0.147012	-0.0126814	0.166341	-0.00232548	0.047433	0.0384354
ENSDARG00000102800	CABZ01081752.2	N/A	-0.0806185	-0.0598561	0.0751561	-0.175746	-0.030069	-0.236413	0.253359	-0.0396193	0.0917476	0.15706	0.0676467	-0.0459007	0.17345	0.269916	-0.0199872	0.0804954
ENSDARG00000098769	SLITRK6	SLIT and NTRK-like family, member 6 [Source:ZFIN;Acc:ZDB-GENE-030131-2816]	-0.382564	0.0570479	0.375552	-0.00854893	0.276633	-0.269146	0.184371	0.0749542	-0.22719	0.156733	-0.16839	-0.0806545	-0.148487	0.0397125	-0.195958	0.0165957
ENSDARG00000078363	MCOLN3A	mucolipin 3a [Source:ZFIN;Acc:ZDB-GENE-121116-4]	0.224962	0.0846354	-0.0579983	0.253229	-0.0853475	0.224993	-0.09112	0.068758	0.0557521	0.156568	0.108535	0.163856	0.160326	0.000338937	0.136957	0.0223276
ENSDARG00000104391	PIMR67	Pim proto-oncogene, serine/threonine kinase, related 67 [Source:ZFIN;Acc:ZDB-GENE-070912-536]	0.0388505	-0.0276685	0.099687	0.0305331	-0.023578	0.0516807	-0.0418465	0.0736681	-0.012081	0.156385	0.0814705	-0.010706	0.0895577	0.0977695	-0.0256321	-0.0115819
ENSDARG00000058791	ZGC:171887	zgc:171887 [Source:ZFIN;Acc:ZDB-GENE-080220-39]	0.0441241	0.15425	0.0418211	0.168615	0.0291178	0.0303485	0.0763238	0.0876528	0.0842813	0.156236	0.110729	0.0331978	0.0587181	0.0510864	0.0858208	0.0890163
ENSDARG00000093303	IFITM1	interferon induced transmembrane protein 1 [Source:ZFIN;Acc:ZDB-GENE-060526-259]	-0.0208121	0.166488	0.330163	0.085415	0.143797	0.135313	0.0923869	0.0534111	-0.0277625	0.156058	0.136752	0.028318	0.0165547	-0.0262978	0.0718487	0.0668437
ENSDARG00000093640	UGT5A2	UDP glucuronosyltransferase 5 family, polypeptide A2 [Source:ZFIN;Acc:ZDB-GENE-061103-373]	0.00668788	0.298423	0.149721	0.00329221	0.0119823	0.173866	0.159906	0.171152	0.149421	0.15593	0.165866	0.12529	0.0736817	0.204069	0.0661955	0.11771
ENSDARG00000055784	PTPN3	protein tyrosine phosphatase, non-receptor type 3 [Source:ZFIN;Acc:ZDB-GENE-030131-2934]	-0.103868	-0.0333686	0.062961	-0.114937	0.0688896	-0.0442724	0.164712	0.26556	0.0036828	0.155723	-0.0583266	-0.0675124	0.0634267	-0.132172	0.0845615	0.0046376
ENSDARG00000029088	GUF1	GUF1 homolog, GTPase [Source:ZFIN;Acc:ZDB-GENE-030131-4289]	-0.131457	0.0589806	-0.0305751	-0.132644	0.0473258	-0.133918	0.00767675	0.0554926	-0.188198	0.15555	-0.0442505	-0.0553722	0.0627554	-0.025843	0.0156201	-0.0276232
ENSDARG00000096564	CU915827.1	N/A	0.0127546	0.23976	0.181722	0.0103605	0.113594	0.167809	0.190599	0.235463	-0.0759616	0.155365	0.0972394	0.0559205	0.0758849	0.141822	0.0192966	0.0395244
ENSDARG00000100214	ZNF1017	zinc finger protein 1017 [Source:ZFIN;Acc:ZDB-GENE-110914-38]	-0.0661635	-0.0679742	0.0972651	-0.0335216	-0.114711	-0.0141395	-0.0140221	0.00168185	-0.02183	0.155334	-0.0639512	-0.0728042	-0.0346981	0.0518748	-0.042436	-0.0850319
ENSDARG00000105060	RDH8B	retinol dehydrogenase 8b [Source:ZFIN;Acc:ZDB-GENE-040426-1759]	-0.0814368	0.181018	0.267938	0.216213	0.295301	-0.030375	0.0980148	0.202367	-0.108567	0.155004	-0.135653	-0.104603	-0.0341882	0.00337853	-0.00511152	-0.0409153
ENSDARG00000019990	CABP1A	calcium binding protein 1a [Source:ZFIN;Acc:ZDB-GENE-041010-36]	-0.188281	-0.0693902	0.152496	0.0389355	0.0635558	-0.146091	0.0281842	-0.0404959	-0.165409	0.154982	-0.000604735	-0.150447	-0.0596002	-0.135905	-0.100188	-0.16829
ENSDARG00000054543	SAMSN1A	SAM domain, SH3 domain and nuclear localisation signals 1a [Source:ZFIN;Acc:ZDB-GENE-030131-8639]	-0.522657	0.0459731	0.213786	-0.1091	0.1758	-0.375115	0.177784	0.0475396	-0.456982	0.154811	0.065616	-0.0832043	0.0470154	-0.154394	-0.076986	0.218545
ENSDARG00000102673	SI:DKEY-26I24.1	si:dkey-26i24.1 [Source:ZFIN;Acc:ZDB-GENE-110913-88]	0.0380565	0.142191	0.0827624	0.003086	0.115124	0.0201447	0.103157	0.111521	0.131576	0.154733	0.13969	0.126888	0.0892914	0.0808725	0.0582454	0.13515
ENSDARG00000077911	TREH	trehalase (brush-border membrane glycoprotein) [Source:ZFIN;Acc:ZDB-GENE-070912-84]	0.0756189	0.115643	0.10209	0.134207	0.128497	0.0613342	0.188813	0.167101	0.0427814	0.154459	0.141773	0.106948	0.0487925	0.0999349	0.12741	0.160704
ENSDARG00000006868	TRH	thyrotropin-releasing hormone [Source:ZFIN;Acc:ZDB-GENE-020930-1]	0.160106	0.343097	0.917846	0.134204	0.431784	-0.018624	0.196361	0.19841	0.000695722	0.154153	0.267665	0.188456	0.214032	0.000779615	0.12585	0.0412533
ENSDARG00000000796	NR4A1	nuclear receptor subfamily 4, group A, member 1 [Source:ZFIN;Acc:ZDB-GENE-040704-11]	-0.152528	0.0902984	0.13253	-0.203598	0.186674	-0.350887	0.318158	0.102833	-0.208893	0.154059	-0.290751	0.117921	0.179964	0.0152821	0.0209513	0.0476743
ENSDARG00000095536	TRIM62	si:ch211-193i15.2 [Source:ZFIN;Acc:ZDB-GENE-141216-17]	-0.033601	0.16175	0.142238	0.0841205	0.26476	0.03539	0.11479	0.142041	0.107439	0.153903	0.274482	0.0224071	0.317316	0.0147963	0.11353	0.19055
ENSDARG00000028087	ALDH2.2	aldehyde dehydrogenase 2 family (mitochondrial), tandem duplicate 2 [Source:ZFIN;Acc:ZDB-GENE-030326-5]	-0.0534973	0.0865342	0.0493509	-0.101828	0.127472	0.0684078	0.0395511	0.116319	0.0395621	0.153765	0.0927098	0.0307326	-0.0858473	0.0599709	0.21548	-0.0433489
ENSDARG00000071143	SI:DKEY-208M12.2	si:dkey-208m12.2 [Source:ZFIN;Acc:ZDB-GENE-060503-716]	0.203557	0.184842	0.261053	0.0203217	0.192638	0.0208732	0.232654	0.248441	0.128847	0.153613	0.225981	-0.06189	0.166053	0.0941486	0.173665	0.0539965
ENSDARG00000026759	LDLRB	low density lipoprotein receptor b [Source:ZFIN;Acc:ZDB-GENE-040426-1254]	-0.154025	0.192772	0.0254351	0.0784372	0.353254	-0.66643	0.290414	0.343006	-0.32402	0.152695	-0.354938	0.0637105	0.218843	0.0589849	-0.00473333	0.192022
ENSDARG00000100478	TULP1	tubby like protein 1 [Source:HGNC Symbol;Acc:HGNC:12423]	-0.04426	0.150358	0.160047	-0.0362197	0.146407	-0.0486866	0.20252	0.125645	-0.00241987	0.152526	-0.00520291	0.0913562	0.110311	0.10474	-0.00840018	0.138321
ENSDARG00000095739	SI:DKEY-73P2.1	si:dkey-73p2.1 [Source:ZFIN;Acc:ZDB-GENE-131122-97]	-0.0862836	0.0101915	0.00823716	-0.00232378	0.0811261	-0.104498	0.0412774	0.0700528	0.0290429	0.152347	-0.0846895	-0.034358	-0.000270346	-0.0417383	0.115411	0.0463245
ENSDARG00000109113	TSHB	thyroid stimulating hormone beta [Source:HGNC Symbol;Acc:HGNC:12372]	-0.0449572	0.0901299	0.208121	0.219429	0.0702183	0.213028	0.304288	0.0504997	0.101943	0.152267	0.254546	0.217476	0.153623	0.200556	0.155549	0.105015
ENSDARG00000103883	SI:CH1073-181H11.2	si:ch1073-181h11.2 [Source:ZFIN;Acc:ZDB-GENE-081031-58]	0.0572709	0.208406	0.0567578	0.0327443	0.0935163	0.000717692	0.0114536	-0.00338595	0.0180949	0.152222	0.0362013	0.0639573	0.00961285	0.0653227	0.174237	-0.0161589
ENSDARG00000088189	SI:CH211-135N15.3	si:ch211-135n15.3 [Source:ZFIN;Acc:ZDB-GENE-131121-406]	0.0209644	0.186317	0.0642451	0.016952	0.00136482	0.0153867	0.268186	0.194081	0.139657	0.152063	0.0904676	0.0466004	0.297895	0.0242941	0.357709	0.251743
ENSDARG00000040133	ACKR4B	atypical chemokine receptor 4b [Source:ZFIN;Acc:ZDB-GENE-051107-10]	0.0330767	0.285078	0.508125	-0.0496713	0.175759	-0.172863	0.325022	0.353591	-0.0763507	0.151682	0.053871	-0.0228126	0.0492066	-0.0680919	0.195214	0.0157122
ENSDARG00000101807	SI:CH211-120C15.3	si:ch211-120c15.3 [Source:ZFIN;Acc:ZDB-GENE-110913-99]	-0.05013	0.12114	0.158044	-0.04243	0.0331643	0.106063	0.0967912	0.111683	-0.00531589	0.151665	0.103267	0.0836834	0.114177	0.132765	0.0491679	-0.0413713
ENSDARG00000097746	SI:RP71-77L1.1	si:rp71-77l1.1 [Source:ZFIN;Acc:ZDB-GENE-131121-141]	0.000312986	-0.202016	-0.289639	-0.197026	-0.235504	-0.213332	-0.109445	-0.150524	-0.276742	0.151521	-0.283068	-0.0545699	0.072341	-0.114295	-0.20555	0.0265957
ENSDARG00000028664	AHSA1A	AHA1, activator of heat shock protein ATPase homolog 1a [Source:ZFIN;Acc:ZDB-GENE-030131-1869]	0.166768	0.0241743	-0.0264867	0.123259	-0.0706595	0.185233	0.0871601	-0.0397519	-0.1232	0.151446	-0.0246955	0.10932	-0.275615	-0.0942987	0.0827292	0.0392587
ENSDARG00000104156	CABZ01017151.1	N/A	0.138064	-0.00476805	-0.0519966	-0.118168	0.150126	0.124878	0.204902	0.0246879	0.105312	0.151423	0.0466998	-0.0417809	-0.0201399	-0.0105957	0.0769067	0.134684
ENSDARG00000068915	SI:CH73-42K18.1	si:ch73-42k18.1 [Source:ZFIN;Acc:ZDB-GENE-141215-12]	0.145604	0.0343861	0.168884	-0.0570272	-0.0804301	-0.00107625	-0.0532314	0.0623935	0.248121	0.151423	-0.0551601	0.0952455	-0.0940608	0.120933	0.0280783	0.00875477
ENSDARG00000074322	SI:CH211-194M7.3	si:ch211-194m7.3 [Source:ZFIN;Acc:ZDB-GENE-131121-19]	0.110122	0.32158	-0.0436639	-0.0675724	0.191031	0.257136	0.0477876	0.135392	-0.0233707	0.151233	0.299802	0.0230884	-0.0536021	-0.00422054	0.200648	0.118195
ENSDARG00000093186	SI:DKEY-30J10.5	si:dkey-30j10.5 [Source:ZFIN;Acc:ZDB-GENE-091118-81]	-0.0878262	0.0453602	0.0445725	0.0986229	0.0416165	0.0155539	0.0881945	0.0535345	0.12557	0.151195	0.0676162	0.0331657	0.117133	0.0842547	-0.0125207	-0.0348975
ENSDARG00000062467	STRA6L	STRA6-like [Source:ZFIN;Acc:ZDB-GENE-070410-116]	0.0730649	-0.0801832	0.123213	0.0519736	-0.0298908	0.188029	0.197897	0.447255	0.0375009	0.151147	0.0443229	0.0586198	0.188746	-0.0776841	0.0851465	0.042918
ENSDARG00000075468	VWA1	von Willebrand factor A domain containing 1 [Source:ZFIN;Acc:ZDB-GENE-030131-5921]	-0.12836	0.216911	0.195556	0.126902	0.356176	0.0999212	0.275643	0.194111	-0.101299	0.150764	0.13716	0.0206338	0.272756	0.14422	0.0130199	0.0173794
ENSDARG00000052288	ZMP:0000000634	zmp:0000000634 [Source:ZFIN;Acc:ZDB-GENE-130530-637]	0.223356	0.0751805	0.02382	0.173068	0.0600956	0.116236	0.125314	0.0937839	0.0833291	0.150087	0.171516	0.0839087	0.0633798	0.12628	0.138538	-0.0300721
ENSDARG00000069589	TMEM222A	transmembrane protein 222a [Source:ZFIN;Acc:ZDB-GENE-050306-17]	0.00232344	0.100495	0.157466	0.21289	0.249879	0.127276	0.214334	0.256472	0.00748682	0.149425	0.276411	0.25178	0.250752	0.157874	0.113454	0.222379
ENSDARG00000099006	CABZ01029938.1	N/A	0.0637366	0.138656	0.292141	0.0393131	0.0766656	0.235975	0.0780879	0.0232938	0.111743	0.149398	0.126752	-0.0118404	0.162094	0.00524136	0.212828	0.100982
ENSDARG00000028276	SI:CH211-196H16.12	si:ch211-196h16.12 [Source:ZFIN;Acc:ZDB-GENE-121214-351]	0.0999336	-0.0625804	-0.0240791	0.036828	-0.173408	0.125336	-0.0174979	0.0112417	0.182601	0.149252	0.0132605	0.135065	-0.077178	0.0400713	0.0316903	-0.160032
ENSDARG00000002644	RGS5A	regulator of G protein signaling 5a [Source:ZFIN;Acc:ZDB-GENE-030131-7570]	-0.172892	-0.112238	0.0629025	0.0283849	0.140533	-0.0287854	0.13182	0.167564	-0.166988	0.14914	0.236048	-0.0428009	0.263039	0.135869	-0.0381119	0.172349
ENSDARG00000069728	RPZ3	rapunzel 3 [Source:ZFIN;Acc:ZDB-GENE-030131-4784]	0.144367	0.217875	0.275171	0.224771	0.249901	-0.0439099	0.242532	0.064742	-0.0192474	0.149057	0.2886	0.0746839	0.271409	0.0667781	0.117774	0.280927
ENSDARG00000095200	SI:CH211-197E7.1	si:ch211-197e7.1 [Source:ZFIN;Acc:ZDB-GENE-081103-26]	0.190632	0.374611	0.0106276	0.0512316	0.151765	-0.139955	0.390934	0.215077	0.0941891	0.148928	-0.0331516	-0.0494542	0.242154	0.0353984	0.133561	-0.0234755
ENSDARG00000103208	IL17RA1B	interleukin 17 receptor A1b [Source:ZFIN;Acc:ZDB-GENE-110914-185]	0.0827201	0.217483	0.00613442	0.212848	0.131692	0.059364	0.158675	0.0596154	-0.0182763	0.148879	0.138271	0.133345	0.117786	-0.0733478	0.113287	0.190763
ENSDARG00000069801	CRYGM2D12	crystallin, gamma M2d12 [Source:ZFIN;Acc:ZDB-GENE-070822-19]	-0.1771	-0.189874	0.0203463	-0.049523	0.176554	0.0587792	0.0994058	0.173273	-0.0345569	0.148773	-0.118889	0.132288	0.0763204	-0.026778	-0.0775073	-0.0446522
ENSDARG00000094534	CR786571.2	N/A	-0.116995	-0.0438573	-0.0739306	-0.0512373	0.18807	0.0407837	-0.0621884	0.0462745	0.026593	0.148757	0.137199	0.0148427	-0.0749944	-0.0232648	-0.0302263	0.0182258
ENSDARG00000029406	H2AFX	H2A histone family, member X [Source:ZFIN;Acc:ZDB-GENE-040426-987]	0.0763834	0.0304092	0.131705	0.0645192	0.275968	0.0792775	0.0958865	-0.081098	0.0658177	0.148713	0.388071	0.0410959	0.231769	0.272168	0.125689	-0.0193141
ENSDARG00000027153	GABRR3A	gamma-aminobutyric acid (GABA) A receptor, rho 3a [Source:ZFIN;Acc:ZDB-GENE-080722-20]	-0.25995	-0.0489647	0.13482	0.017513	0.0357349	-0.246866	0.219474	-0.0933615	-0.218782	0.14851	0.00630658	0.0191643	-0.0952582	-0.101153	0.0320111	0.0069708
ENSDARG00000086912	CRYGM2D18	crystallin, gamma M2d18 [Source:ZFIN;Acc:ZDB-GENE-040625-154]	-0.121975	-0.234144	-0.0325949	0.0971633	0.149618	-0.0445627	0.069154	0.157144	-0.00524938	0.148446	-0.153644	0.151061	0.00412848	-0.103498	-0.0952689	-0.0552303
ENSDARG00000094675	TUSC5B	tumor suppressor candidate 5b [Source:ZFIN;Acc:ZDB-GENE-091204-45]	-0.00740695	-0.0193491	0.203803	0.0204637	0.0472605	0.0450902	0.12188	0.121642	-0.00906976	0.148106	-0.0736498	0.0337669	-0.0582134	-0.0650741	0.152297	-0.0359412
ENSDARG00000055514	ICN2	ictacalcin 2 [Source:ZFIN;Acc:ZDB-GENE-070822-9]	0.0463937	0.133891	0.118601	-0.0412897	0.0645183	0.0991297	0.183688	0.265901	0.0323369	0.14807	-0.168546	0.0415844	-0.0397702	-0.0482768	0.118539	-0.0747456
ENSDARG00000101797	CT737127.2	N/A	0.110466	-0.0144256	-0.0558464	-0.136431	-0.120428	0.0851901	0.0975131	-0.0881661	0.0181062	0.148052	0.0428728	-0.0536175	0.0960038	-0.0254815	0.195487	-0.0312936
ENSDARG00000002293	SI:CH211-197G15.9	si:ch211-197g15.9 [Source:ZFIN;Acc:ZDB-GENE-050208-616]	-0.0742908	0.115714	0.0552244	0.0150765	0.140585	0.0338243	0.019594	0.2154	-0.0578183	0.147994	0.0362482	0.00268954	0.0302216	0.0442827	0.0690311	-0.041011
ENSDARG00000104204	SLC1A8A	solute carrier family 1 (glutamate transporter), member 8a [Source:ZFIN;Acc:ZDB-GENE-101111-8]	-0.23497	-0.0194604	0.0160032	-0.0370107	0.0906174	-0.0242204	0.0487291	0.00469726	-0.094425	0.147467	-0.0204156	-0.0635228	-0.0527722	-0.0623927	-0.0570304	0.0215456
ENSDARG00000013522	PCK1	phosphoenolpyruvate carboxykinase 1 (soluble) [Source:ZFIN;Acc:ZDB-GENE-030909-11]	-0.0295587	0.530612	0.353765	0.022088	0.479967	0.12116	0.132987	0.349257	0.0387465	0.147361	-0.0360415	0.15176	-0.110658	-0.0126071	-0.152624	0.116585
ENSDARG00000103260	SI:CH211-57B15.1	si:ch211-57b15.1 [Source:ZFIN;Acc:ZDB-GENE-141210-17]	0.116299	0.109047	0.164898	-0.069239	0.0520806	0.0409803	0.0704012	0.0978079	-0.0755637	0.147287	0.032876	-0.00209982	0.0672374	0.0737824	0.123003	0.0494787
ENSDARG00000074829	RASIP1	Ras interacting protein 1 [Source:ZFIN;Acc:ZDB-GENE-120403-3]	0.0124397	0.236291	0.239453	0.0563119	0.208788	0.0544812	0.133328	0.117819	-0.0175584	0.146854	0.350124	0.158408	0.137902	0.0424366	0.0488135	0.0580961
ENSDARG00000017314	CELA1	zgc:92041 [Source:ZFIN;Acc:ZDB-GENE-040808-55]	0.17189	-0.0078521	-0.0621375	0.145997	-0.0387386	0.124565	0.119286	-0.00162888	0.294034	0.145913	0.150382	0.177318	0.151705	0.161285	0.256694	0.187233
ENSDARG00000030411	CRYGN2	crystallin, gamma N2 [Source:ZFIN;Acc:ZDB-GENE-040801-16]	-0.180201	-0.0853564	-0.00126424	0.0242174	0.225965	0.0895233	0.0429161	0.0473204	0.00921659	0.14538	0.0179271	0.0629661	0.0248354	-0.028955	-0.0374226	-0.0105093
ENSDARG00000087102	SI:CH1073-164K15.3	si:ch1073-164k15.3 [Source:ZFIN;Acc:ZDB-GENE-131119-59]	-0.028279	0.23331	0.228323	0.00822317	0.160576	-0.0950607	0.168062	0.196565	0.0255538	0.145322	0.0791364	-0.103869	0.188766	0.162836	0.197589	0.0524613
ENSDARG00000061083	IGL4V8	immunoglobulin light 4 variable 8 [Source:ZFIN;Acc:ZDB-GENE-051013-6]	-0.152064	-0.0969756	0.206879	-0.252225	-0.118301	-0.0426551	-0.0632113	-0.124773	0.165912	0.145063	-0.115058	0.0438137	0.0695167	0.0419042	0.0278273	0.000613659
ENSDARG00000088013	CYP27A1	zgc:136333 [Source:ZFIN;Acc:ZDB-GENE-060616-143]	-0.0935141	-0.126298	0.11173	0.0777743	-0.0416113	-0.18332	-0.0227676	-0.192443	-0.173068	0.144925	-0.169369	0.022316	-0.0228954	0.0421949	0.0123217	-0.0994534
ENSDARG00000087574	NOX1	NADPH oxidase 1 [Source:ZFIN;Acc:ZDB-GENE-070404-1]	0.265357	-0.197028	-0.0659327	-0.226383	0.172098	0.191681	0.0323618	0.0824164	-0.220513	0.144918	0.0329092	0.118135	0.0514726	-0.111965	0.0726178	0.0385774
ENSDARG00000035852	CART3	cocaine- and amphetamine-regulated transcript 3 [Source:ZFIN;Acc:ZDB-GENE-120223-5]	0.207488	-0.0736137	0.346899	0.142965	0.335267	0.167706	0.0987122	0.152742	0.0490643	0.144907	0.126431	0.0812803	0.0640561	0.0457453	0.0240117	-0.0273731
ENSDARG00000099641	ZNF569L	zinc finger protein 569, like [Source:ZFIN;Acc:ZDB-GENE-110914-7]	-0.0697089	0.0610985	0.0377059	-0.115466	-0.042369	-0.0690521	0.0243903	-0.0310615	0.0372699	0.144846	-0.0575379	-0.0301378	0.0422739	-0.00941625	-0.006242	-0.072786
ENSDARG00000020544	REM1	RAS (RAD and GEM)-like GTP-binding 1 [Source:ZFIN;Acc:ZDB-GENE-040317-1]	-0.188721	0.0608085	0.15565	-0.0548617	0.0210408	-0.108164	0.0570709	0.129928	-0.145042	0.144775	-0.0595735	0.0234888	-0.110237	-0.103636	0.021784	-0.0245063
ENSDARG00000096514	SI:CH211-286B5.2	si:ch211-286b5.2 [Source:ZFIN;Acc:ZDB-GENE-121214-251]	0.0721173	0.0236838	0.101476	0.0491986	0.0148065	0.0390484	0.0548826	0.00325262	0.0305574	0.14473	0.109948	0.0347294	0.0158834	0.0306258	0.0804058	0.012747
ENSDARG00000093469	ZNF653	zinc finger protein 653 [Source:ZFIN;Acc:ZDB-GENE-071116-3]	0.242818	0.0770384	0.116519	0.219019	0.100546	0.0586308	0.131363	0.168435	0.121405	0.144715	0.00423899	0.15989	0.0824241	0.120672	0.0980198	0.153162
ENSDARG00000099580	BX537120.2	N/A	-0.028547	-0.1091	-0.0523562	0.0399486	0.130225	-0.0415379	0.225403	-0.0370587	0.0177052	0.144682	-0.0257531	0.135355	0.0137593	0.0674467	-0.0403064	0.124952
ENSDARG00000104576	SI:CH211-152C8.5	si:ch211-152c8.5 [Source:ZFIN;Acc:ZDB-GENE-030131-5764]	0.178044	0.116375	-0.169043	-0.206576	-0.341587	0.00358005	-0.0760257	-0.104662	0.399586	0.144529	0.0964231	-0.0627607	-0.0337533	-0.132971	0.150013	-0.07658
ENSDARG00000076283	SNRPD3L	small nuclear ribonucleoprotein D3 polypeptide, like [Source:ZFIN;Acc:ZDB-GENE-030131-5219]	0.191368	0.00442269	-0.0220153	-0.0809463	0.0323109	0.145252	0.0113447	0.102248	0.193344	0.144408	-0.107021	0.20911	-0.0390013	-0.0350495	0.285834	-0.0279548
ENSDARG00000095275	SI:DKEY-269P2.1	si:dkey-269p2.1 [Source:ZFIN;Acc:ZDB-GENE-081103-5]	0.120592	0.0922563	0.135887	-0.0107668	0.0419577	0.22084	0.0689856	0.212435	0.297992	0.144212	0.0965382	0.184109	0.00479807	-0.0683149	0.196867	-0.0217451
ENSDARG00000013928	PLEKHB2	pleckstrin homology domain containing, family B (evectins) member 2 [Source:ZFIN;Acc:ZDB-GENE-040426-754]	0.382969	0.189257	0.202836	0.348215	-0.117022	0.179378	0.0912795	0.16063	0.269269	0.143621	0.0309269	0.342558	0.0755501	0.182639	0.160449	0.180989
ENSDARG00000088069	CR759879.1	interferon-induced protein with tetratricopeptide repeats 5 [Source:RefSeq peptide;Acc:NP_001289169]	-0.171253	0.0285816	0.0923118	0.238285	0.228894	0.0461242	0.140585	0.168533	-0.149288	0.143132	0.123072	0.0714608	-0.0352688	0.0994282	0.115406	0.302538
ENSDARG00000055276	REL	v-rel avian reticuloendotheliosis viral oncogene homolog [Source:ZFIN;Acc:ZDB-GENE-040718-255]	-0.012204	0.10647	0.135458	0.0276366	0.184853	-0.0485855	0.198824	0.0357506	0.041796	0.143114	0.123294	0.0661804	0.163718	-0.0557565	0.205814	0.0773491
ENSDARG00000039512	AP1M3	adaptor-related protein complex 1, mu 3 subunit [Source:ZFIN;Acc:ZDB-GENE-040801-159]	0.0444439	-0.0382557	0.0941544	0.0382117	0.166613	0.128898	0.0387894	0.168941	0.0789293	0.143089	-0.132458	0.0124098	-0.0794256	-0.18667	0.179802	0.0473163
ENSDARG00000061165	SLC6A4A	solute carrier family 6 (neurotransmitter transporter), member 4a [Source:ZFIN;Acc:ZDB-GENE-060314-1]	0.0123519	0.514027	0.312718	0.11262	0.31477	-0.0978333	0.181336	-0.00783018	-0.0684173	0.143008	0.252797	0.0900018	-0.0562457	0.0566214	0.0406049	0.0809573
ENSDARG00000092807	RPL41	si:dkey-151g10.6 [Source:ZFIN;Acc:ZDB-GENE-030131-7528]	0.138833	0.0981894	0.0129078	-0.167817	0.16494	0.261389	-0.000253133	0.0930512	0.281569	0.142644	-0.161277	0.0980864	-0.206412	-0.111124	0.150709	-0.0867231
ENSDARG00000030872	CETP	cholesteryl ester transfer protein, plasma [Source:ZFIN;Acc:ZDB-GENE-041114-54]	0.329138	-0.394239	-0.116739	0.0574848	-0.0211555	0.300142	-0.17135	-0.105859	-0.204662	0.142562	-0.106403	-0.0763502	0.0847512	0.0647548	-0.0335037	-0.0586384
ENSDARG00000102922	BX470115.2	N/A	0.186857	2.73e-05	0.106476	0.18977	-0.0542597	-0.00918549	-0.0189111	0.000291257	0.214172	0.142512	-0.00377428	0.0549595	0.0809979	-0.0202691	0.171445	0.0982004
ENSDARG00000101977	SI:CH211-209N20.59	si:ch211-209n20.59 [Source:ZFIN;Acc:ZDB-GENE-120709-58]	-0.122091	0.00672657	0.106767	0.0684713	0.0163988	0.0346639	0.0980322	-0.0313582	0.0660262	0.14222	0.0871864	0.0822313	-0.167909	0.0263059	0.0347315	0.0462883
ENSDARG00000091148	CRYGM2D20	crystallin, gamma M2d20 [Source:ZFIN;Acc:ZDB-GENE-070424-32]	-0.228672	-0.077982	-0.0308637	-0.0278781	0.234289	-0.0751066	0.0650328	0.112291	-0.0282733	0.142175	-0.10711	0.0876839	0.031029	-0.0707968	-0.0528616	-0.0889683
ENSDARG00000103053	CR383680.2	N/A	0.0236274	0.041833	0.0685039	0.178554	0.130704	0.177705	0.0441507	0.0797741	0.0369891	0.142132	-0.00521279	0.0934446	0.0741735	0.128737	0.0465311	0.12807
ENSDARG00000098406	SI:DKEY-22A18.2	si:dkey-22a18.2 [Source:ZFIN;Acc:ZDB-GENE-120703-7]	0.0780271	0.360251	0.28769	0.111617	0.294838	0.0781766	0.0250913	0.185073	-0.127402	0.1421	0.0515462	0.105028	0.264502	-0.0149747	0.182614	0.242565
ENSDARG00000041051	MID1IP1A	MID1 interacting protein 1a [Source:ZFIN;Acc:ZDB-GENE-990415-81]	0.267794	-0.27192	-0.125202	-0.0672685	-0.108552	-0.23978	0.111547	-0.0244649	0.0723492	0.141924	0.121261	-0.0405015	-0.0247197	0.035689	-0.0482106	-0.205744
ENSDARG00000069481	GHRH	growth hormone releasing hormone [Source:ZFIN;Acc:ZDB-GENE-070426-1]	0.278961	-0.00239205	0.00369507	0.0889207	0.00371266	0.0955587	0.0208928	0.0639164	0.0687391	0.141509	0.00738803	0.0131705	0.326658	0.200307	0.0467775	0.0190809
ENSDARG00000104006	ZNF1082	zinc finger protein 1082 [Source:ZFIN;Acc:ZDB-GENE-110913-158]	0.062732	0.0277341	0.295785	0.291545	0.188588	0.257989	0.117223	0.148822	0.24832	0.141289	0.0664283	0.216108	0.125376	0.0469545	0.13942	0.093392
ENSDARG00000037532	MCM3L	MCM3 minichromosome maintenance deficient 3 (S. cerevisiae), like [Source:ZFIN;Acc:ZDB-GENE-040121-2]	0.0618227	0.251493	0.222352	0.0222468	0.119115	0.182704	0.0626547	0.165705	0.0569572	0.140904	-0.0415431	0.0843169	0.201639	-0.0488401	0.0119407	0.169279
ENSDARG00000037921	GNG13B	guanine nucleotide binding protein (G protein), gamma 13b [Source:ZFIN;Acc:ZDB-GENE-040718-97]	-0.857891	-0.0087994	0.193786	0.0303551	0.1266	-0.712905	0.340357	0.203896	-0.853079	0.14085	-0.119124	-0.0394757	0.0188393	-0.0734852	-0.186427	0.100087
ENSDARG00000076773	LRRC58A	leucine rich repeat containing 58a [Source:ZFIN;Acc:ZDB-GENE-090312-76]	0.0704822	0.317073	0.196428	0.256202	0.148583	0.399897	0.0800896	0.161873	0.259558	0.140764	0.22419	0.126777	0.14711	0.121174	0.38754	0.113684
ENSDARG00000100925	CU104709.1	N/A	0.178579	0.353711	0.275237	0.276874	0.215459	0.338026	0.140776	0.0771865	0.163176	0.140726	0.0937267	0.146454	0.140418	0.207333	0.252495	0.0656918
ENSDARG00000018146	GPX1A	glutathione peroxidase 1a [Source:ZFIN;Acc:ZDB-GENE-030410-1]	-0.0851574	0.503411	-0.0649723	0.0146445	0.284127	-0.0185551	-0.13508	0.0968318	0.0378343	0.140586	-0.283948	0.0349618	-0.0939779	-0.00921358	-0.165754	-0.0326654
ENSDARG00000034273	SID4	secreted immunoglobulin domain 4 [Source:ZFIN;Acc:ZDB-GENE-050726-3]	0.175748	0.220349	0.0468306	0.148738	0.267405	0.400759	0.0833132	0.0727816	0.319091	0.140295	0.154482	0.017152	-0.121375	0.0607825	0.111402	0.163752
ENSDARG00000057741	NR1H4	nuclear receptor subfamily 1, group H, member 4 [Source:ZFIN;Acc:ZDB-GENE-040718-313]	-0.332575	-0.0436532	0.172651	-0.0244545	0.25238	-0.0480302	0.0260798	0.196185	-0.17018	0.14029	-0.00740888	-0.0052308	-0.0247902	0.041133	0.0768426	-0.039884
ENSDARG00000045153	SLC16A8	solute carrier family 16 (monocarboxylate transporter), member 8 [Source:ZFIN;Acc:ZDB-GENE-121128-1]	-0.140232	0.01264	0.229739	0.0681382	0.0492998	0.118639	0.00836481	0.030242	0.111205	0.140185	0.165369	0.0126622	-0.091822	0.238842	0.0531986	-0.0235735
ENSDARG00000100464	SI:DKEY-193I10.1	si:dkey-193i10.1 [Source:ZFIN;Acc:ZDB-GENE-070705-341]	0.135743	0.368268	0.235903	0.243478	0.068185	-0.0445969	0.1093	0.173962	-0.0117855	0.14018	0.252504	-0.12777	0.150369	0.21403	0.12746	0.184718
ENSDARG00000076790	CRYGM2D16	crystallin, gamma M2d16 [Source:ZFIN;Acc:ZDB-GENE-071004-53]	-0.233785	-0.225501	0.0829746	-0.0109486	0.121826	-0.0871489	0.137841	0.215959	-0.152543	0.139945	-0.107995	0.121844	0.0671088	-0.102458	-0.0676944	-0.0067162
ENSDARG00000013389	ZGC:110204	zgc:110204 [Source:ZFIN;Acc:ZDB-GENE-050417-360]	0.0178361	0.0579766	0.160647	0.0111214	0.11083	0.0318875	0.0244213	-0.0371422	0.0859929	0.139784	0.0853038	0.0701379	-0.024873	0.107712	0.0713946	0.202326
ENSDARG00000060124	TIMM17B	translocase of inner mitochondrial membrane 17 homolog B (yeast) [Source:ZFIN;Acc:ZDB-GENE-081104-144]	0.0280941	0.131853	0.071722	-0.0422527	0.140387	-0.0744907	0.197878	-0.0254073	0.220891	0.139719	-0.00988236	-0.0754469	-0.00496644	0.110436	0.110717	0.0153408
ENSDARG00000104492	CABZ01113061.1	N/A	-0.000450883	0.368069	0.269751	-0.00749447	0.424427	-0.0268363	0.281672	0.147014	0.110844	0.139633	0.328242	-0.0386479	0.20388	0.0908669	0.0554528	0.147384
ENSDARG00000100288	IMPG2B	interphotoreceptor matrix proteoglycan 2b [Source:ZFIN;Acc:ZDB-GENE-081031-56]	-0.219989	0.120154	0.212231	0.0909874	0.0378905	-0.200194	0.164651	0.162605	-0.221491	0.139391	0.0868222	0.106438	0.0995297	0.265553	0.245299	0.196114
ENSDARG00000022817	PVALB3	parvalbumin 3 [Source:ZFIN;Acc:ZDB-GENE-040426-945]	0.0909278	0.279994	-0.0373001	-0.0914123	-0.0743984	-0.182046	0.0395118	0.156468	0.2768	0.138835	0.00571783	-0.0673024	0.0894405	0.0792712	0.156979	-0.0143779
ENSDARG00000070038	RBP2A	retinol binding protein 2a, cellular [Source:ZFIN;Acc:ZDB-GENE-020320-2]	-0.299431	0.131871	0.113326	-0.153127	-0.0624352	-0.315355	0.365949	0.200759	0.103316	0.138805	0.285962	0.038693	0.178647	-0.00546859	0.0739326	-0.0414658
ENSDARG00000038191	SMTLA	somatolactin alpha [Source:ZFIN;Acc:ZDB-GENE-060123-2]	0.0654919	0.286682	-0.0427552	0.147889	0.0403642	0.0722691	0.0165149	0.113075	0.160048	0.138783	0.222238	0.0955253	0.0491779	0.152592	0.0267664	0.0728881
ENSDARG00000057113	C6	complement component 6 [Source:ZFIN;Acc:ZDB-GENE-040426-1358]	0.233267	-0.086281	-0.062795	-0.0349887	0.0172775	0.299872	0.0236954	-0.0987496	-0.0982464	0.138496	0.321314	-0.0979898	0.187881	-0.0852815	-0.0199332	0.0575328
ENSDARG00000079892	SI:DKEY-183C2.4	si:dkey-183c2.4 [Source:ZFIN;Acc:ZDB-GENE-041210-121]	-0.0218617	0.214508	0.0552601	0.0313331	0.194474	0.177516	0.206217	0.314747	0.240068	0.138364	0.0349528	0.0709365	0.213959	0.0111998	0.215962	-0.041196
ENSDARG00000002165	PSME1	proteasome activator subunit 1 [Source:ZFIN;Acc:ZDB-GENE-991110-17]	-0.0107105	0.0760422	0.0562396	-0.127556	0.306165	-0.182925	-0.0572343	0.135578	-0.1201	0.138221	-0.143708	-0.139186	0.0089271	-0.282315	-0.12542	-0.0908769
ENSDARG00000086917	CRYGM2D2	crystallin, gamma M2d2 [Source:ZFIN;Acc:ZDB-GENE-060918-1]	-0.192525	-0.0138377	0.0990825	-0.0596959	-0.0631282	0.0746635	0.0852891	0.0120683	0.00684069	0.138098	-0.0624833	0.0886695	0.113194	0.0150792	0.0349805	0.042769
ENSDARG00000070506	CR450842.1	N/A	0.0141429	0.0537348	0.0438077	0.0205889	0.131312	-0.0247956	0.00195687	0.046029	-0.0470797	0.137966	0.109517	0.121636	0.011072	0.0296468	0.0243297	0.0402012
ENSDARG00000088687	CRYGM2D17	crystallin, gamma M2d17 [Source:ZFIN;Acc:ZDB-GENE-070720-9]	-0.361163	-0.0606726	-0.0191131	-0.238686	0.0861162	-0.0395696	0.0842614	-0.0120677	-0.0482392	0.137954	-0.0996088	0.0152672	-0.0316041	-0.172626	-0.0164322	-0.0684268
ENSDARG00000101560	PSMA1	proteasome subunit alpha 1 [Source:ZFIN;Acc:ZDB-GENE-040801-15]	0.0857963	0.0182547	0.00620082	-0.0274367	0.247459	0.142307	0.0459051	0.0622896	0.189791	0.137904	0.0403453	0.0493143	0.0237243	-0.058808	0.0190769	0.0173805
ENSDARG00000104210	EFEMP1	si:ch73-173h19.3 [Source:ZFIN;Acc:ZDB-GENE-081104-245]	-0.206084	-0.0525262	0.312165	0.075648	0.131467	-0.261756	0.133542	0.00406468	-0.482787	0.13789	0.0829832	-0.0982512	0.189553	-0.0212908	-0.113669	-0.0476049
ENSDARG00000098514	SI:CH211-59D8.3	si:ch211-59d8.3 [Source:ZFIN;Acc:ZDB-GENE-120709-11]	0.0709143	0.0394813	0.0915916	0.0402856	0.127572	0.168029	0.0659901	0.151369	0.120679	0.137872	0.091282	0.060801	0.153058	0.118561	0.0705479	0.0363372
ENSDARG00000053131	IRAK3	interleukin-1 receptor-associated kinase 3 [Source:ZFIN;Acc:ZDB-GENE-060503-710]	0.0128084	0.179538	0.161784	0.0128216	0.128513	0.617269	0.0880104	0.0693408	0.0711651	0.137849	0.156072	-0.00254796	0.120071	0.00386438	0.152259	0.0664111
ENSDARG00000090526	ZGC:158404	zgc:158404 [Source:ZFIN;Acc:ZDB-GENE-070112-592]	-0.0350702	0.434609	0.115189	0.171111	0.238151	-0.162521	0.180509	0.0706518	-0.0433258	0.137605	-0.0368647	0.00588524	-0.0382025	0.0779635	0.0780407	0.0524346
ENSDARG00000100833	SI:DKEY-269I1.4	si:dkey-269i1.4 [Source:ZFIN;Acc:ZDB-GENE-121214-37]	0.368411	0.12132	-0.168919	0.106434	-0.0480389	0.54905	-0.148025	0.0753242	0.0843056	0.137495	0.198561	0.119553	0.228355	0.20004	0.197932	0.0107264
ENSDARG00000094046	SI:DKEYP-26A9.7	si:dkeyp-26a9.7 [Source:ZFIN;Acc:ZDB-GENE-100922-50]	0.256878	0.162803	0.176366	0.100183	0.0557182	0.122822	0.0926323	0.182342	0.158155	0.13738	0.235465	0.106305	0.102142	0.0727698	0.225417	0.0877063
ENSDARG00000025218	MYO5AB	myosin VAb [Source:ZFIN;Acc:ZDB-GENE-050411-72]	0.0610029	0.121023	0.0683609	0.170104	0.251351	0.142109	0.0912992	0.157829	0.128623	0.137216	0.237548	0.0583309	0.103381	0.211642	0.0655634	0.046812
ENSDARG00000061161	UBE2J2	ubiquitin-conjugating enzyme E2, J2 (UBC6 homolog, yeast) [Source:ZFIN;Acc:ZDB-GENE-070410-28]	0.0169038	-0.0952481	-0.113405	0.0713585	0.208609	0.170429	0.122855	0.167186	0.16852	0.137116	-0.0319058	0.150544	-0.0380779	-0.0410437	0.0260885	0.111329
ENSDARG00000039958	UTP11L	UTP11-like, U3 small nucleolar ribonucleoprotein (yeast) [Source:ZFIN;Acc:ZDB-GENE-030131-8093]	0.174902	-0.0529401	0.0549331	0.157897	0.200269	0.156431	-0.0116671	0.0190652	0.00618361	0.137077	0.245635	0.171878	0.0707899	0.202502	0.0652391	0.111146
ENSDARG00000078093	ZGC:172065	zgc:172065 [Source:ZFIN;Acc:ZDB-GENE-080214-2]	0.123802	0.178297	0.0942082	0.0729948	0.0826788	-0.0102556	0.0866789	0.143216	0.0384046	0.136969	0.1326	0.0424026	0.0655627	0.230375	0.224035	-0.0227451
ENSDARG00000093764	SI:DKEY-145C18.5	si:dkey-145c18.5 [Source:ZFIN;Acc:ZDB-GENE-081104-310]	-0.0782697	0.212916	0.103563	-0.180172	-0.0314773	0.0664287	0.0772708	0.000153088	-0.0987494	0.136881	-0.0528768	-0.051454	0.0450473	-0.0426133	0.117447	-0.101092
ENSDARG00000105696	CABZ01021433.1	N/A	-0.0739522	-0.099714	0.0854359	0.0556602	0.119531	-0.0618863	0.204704	0.0321612	0.152844	0.136376	0.0235275	0.0784144	0.0490457	0.111151	0.0197614	0.129131
ENSDARG00000099151	WBP11	WW domain binding protein 11 [Source:HGNC Symbol;Acc:HGNC:16461]	-0.07177	-0.0327835	-0.129889	-0.237477	0.176606	0.0724925	0.129388	0.308944	0.278457	0.136359	-0.0354194	4.44e-05	-0.234714	-0.120456	0.0201173	0.148791
ENSDARG00000061505	MRPS9	mitochondrial ribosomal protein S9 [Source:ZFIN;Acc:ZDB-GENE-060825-257]	0.112302	0.0385779	0.0100255	0.00899967	0.192442	0.071111	0.0316274	0.0787024	0.0545534	0.135888	0.0107121	0.0289774	0.123274	0.110697	-0.0411334	0.0911766
ENSDARG00000100935	CR847898.4	N/A	0.168643	0.260492	0.046792	0.0461533	0.260028	0.270036	0.0608352	0.114439	0.113801	0.135866	0.0201702	0.0653689	0.200859	0.120202	0.272169	0.189803
ENSDARG00000100110	SI:CH211-79G12.2	si:ch211-79g12.2 [Source:ZFIN;Acc:ZDB-GENE-110913-21]	0.0698808	0.103564	0.0903178	-0.0341322	0.0421231	0.0129976	0.151241	0.0844279	0.194617	0.135862	0.0858966	0.164212	0.22496	0.0869729	0.220945	0.0158037
ENSDARG00000009121	CHRM1B	cholinergic receptor, muscarinic 1b [Source:ZFIN;Acc:ZDB-GENE-070705-188]	-0.0296231	0.250624	0.100887	-0.0280452	0.121246	-0.0405835	0.0552486	0.052398	-0.0178405	0.135858	-0.0196544	0.000110645	-0.00526458	-0.00197172	-0.0483835	-0.00784434
ENSDARG00000100512	ZNF986	zinc finger protein 986 [Source:ZFIN;Acc:ZDB-GENE-110913-135]	0.0454955	-0.100654	0.138993	0.210656	0.019782	0.124562	0.102235	0.111965	0.0435823	0.135778	0.195278	-0.0431354	0.0186056	0.112219	-0.0616522	0.0886357
ENSDARG00000100111	AL928685.5	N/A	0.144503	0.202919	0.134541	0.0422775	0.170864	0.0753379	0.0343773	0.116168	0.0182673	0.135583	0.104707	0.0353543	0.10204	0.0528096	0.0272544	0.0175523
ENSDARG00000105052	CFHL5	complement factor H like 5 [Source:ZFIN;Acc:ZDB-GENE-050208-782]	0.0685662	0.238345	-0.00750792	0.0542323	-0.0469855	0.120705	-0.0565678	0.0358462	-0.0533957	0.13552	0.212233	-0.116876	-0.00361927	0.0336933	-0.129734	-0.107222
ENSDARG00000038894	TMX3	thioredoxin-related transmembrane protein 3 [Source:ZFIN;Acc:ZDB-GENE-050522-396]	-0.334672	-0.037233	0.168046	0.0590565	0.289255	-0.332376	0.229655	0.15729	-0.265369	0.135297	0.200059	0.215565	0.195259	0.0172267	0.00652058	0.071861
ENSDARG00000103969	SMYHC2	slow myosin heavy chain 2 [Source:ZFIN;Acc:ZDB-GENE-070822-12]	-0.0705898	0.0354388	0.0228279	0.224562	0.22529	-0.146061	-0.0321246	0.0135926	0.0430188	0.135125	0.0224653	0.138649	0.0772274	-0.0225661	-0.125389	0.00314261
ENSDARG00000104773	JUNBB	jun B proto-oncogene b [Source:ZFIN;Acc:ZDB-GENE-040426-2666]	0.0117641	0.157982	0.160661	-0.0139013	0.378045	0.594299	-0.0964306	0.00302671	0.0353238	0.134703	0.157244	-0.00486262	-0.0881895	-0.101524	-0.0557289	0.039981
ENSDARG00000103495	ZGC:173714	zgc:173714 [Source:ZFIN;Acc:ZDB-GENE-071004-90]	-0.0619664	0.0691798	0.0337298	-0.0658313	0.0419335	0.143486	0.118716	0.0924466	0.0543497	0.134522	0.20608	0.109976	0.0290736	0.121507	0.110073	0.0227533
ENSDARG00000098332	ZGC:112970	zgc:112970 [Source:ZFIN;Acc:ZDB-GENE-050327-83]	0.149804	-0.0184718	0.0417582	-0.0959419	-0.061843	0.0354284	0.0874448	0.0442533	0.120229	0.134514	0.0733803	0.0687595	0.0994057	0.0390304	0.32281	-0.106495
ENSDARG00000101393	SI:DKEY-31G6.6	si:dkey-31g6.6 [Source:ZFIN;Acc:ZDB-GENE-110209-1]	-0.324885	0.0245796	0.254727	-0.0170551	-0.0591671	0.0244162	0.28787	0.0269814	-0.181841	0.133992	-0.0942494	0.0314376	-0.0231509	0.0923084	0.0828927	-0.0651591
ENSDARG00000101726	SI:CH211-93F2.1	si:ch211-93f2.1 [Source:ZFIN;Acc:ZDB-GENE-041014-96]	-0.272054	0.194298	0.238173	-0.00012288	0.221638	-0.0573222	0.0605343	0.237014	-0.0510938	0.133977	-0.00857754	0.0347782	0.153278	-0.103092	0.0960726	-0.135881
ENSDARG00000088924	SI:DKEY-185E18.7	si:dkey-185e18.7 [Source:ZFIN;Acc:ZDB-GENE-141215-72]	0.191803	-0.12144	-0.0346372	0.0557659	0.0787399	-0.0305474	0.0431035	-0.0735462	0.161237	0.133918	0.119939	0.0196111	0.153932	0.049617	0.0625766	0.00113916
ENSDARG00000071084	WIPF1B	WAS/WASL interacting protein family, member 1b [Source:ZFIN;Acc:ZDB-GENE-110815-1]	-0.105456	-0.0591055	-0.00221387	-0.0449636	-0.0511815	0.0358975	0.0451479	0.0276044	0.0194779	0.133769	-0.017128	-0.0152953	-0.11752	-0.081733	0.0295151	-0.0473911
ENSDARG00000101757	SI:DKEY-27N6.4	si:dkey-27n6.4 [Source:ZFIN;Acc:ZDB-GENE-041014-42]	-0.0879518	0.337973	0.281112	0.0156116	0.21547	-0.193352	0.0370973	0.192345	-0.0793318	0.133381	-0.0328341	-0.191022	0.209526	-0.0708946	0.0582017	-0.0444818
ENSDARG00000103649	BX005399.8	N/A	0.0213817	0.0616826	-0.0423911	0.0721698	0.0127752	0.0462057	0.104188	0.0271636	-0.0256932	0.133379	0.11358	0.0832137	0.0279119	-0.0433597	0.012758	0.0672413
ENSDARG00000057460	CRYGM2D13	crystallin, gamma M2d13 [Source:ZFIN;Acc:ZDB-GENE-040718-105]	-0.0702342	-0.243091	-0.0234372	0.0588102	0.0550818	-0.0206042	0.123377	0.142969	0.107841	0.133251	-0.148784	0.113724	0.0565201	-0.00492574	0.0284502	-0.0585133
ENSDARG00000101707	SI:CH211-156B7.4	si:ch211-156b7.4 [Source:ZFIN;Acc:ZDB-GENE-141212-376]	0.101503	-0.0237929	-0.101122	-0.0439437	-0.0143497	0.334861	0.0577555	0.0665252	0.368321	0.133155	-0.123865	0.101387	-0.0665668	-0.130449	0.215753	-0.0647658
ENSDARG00000058532	PIMR209	Pim proto-oncogene, serine/threonine kinase, related 209 [Source:ZFIN;Acc:ZDB-GENE-110411-216]	0.0712521	0.0872374	0.0638235	0.0358914	0.103841	0.0556575	0.0773477	0.058735	0.0133967	0.132841	0.0889227	0.079452	0.0899729	0.0749984	0.20424	0.114912
ENSDARG00000054562	HER15.1	hairy and enhancer of split-related 15, tandem duplicate 1 [Source:ZFIN;Acc:ZDB-GENE-030707-2]	0.190416	0.383241	0.0475098	0.0935121	0.109324	0.447971	-0.0507976	0.214146	0.599415	0.132779	0.10537	0.142176	0.038024	0.0762942	0.305727	0.0459617
ENSDARG00000037889	WNT9B	wingless-type MMTV integration site family, member 9B [Source:ZFIN;Acc:ZDB-GENE-080201-1]	0.0877451	0.0544971	-0.0721301	-0.0686675	0.00982662	0.255581	0.0525341	0.111893	0.180974	0.132727	0.0171971	0.096679	-0.078186	-0.0373809	0.195789	0.0738858
ENSDARG00000101149	CABZ01001464.1	N/A	0.0229965	0.017225	0.0249401	0.005468	0.0556385	-0.0232474	0.0953583	0.121044	0.0679727	0.132637	0.0608207	0.0346986	0.0510805	0.0559201	0.0456303	0.0541678
ENSDARG00000032206	CTHL	cystathionase (cystathionine gamma-lyase), like [Source:ZFIN;Acc:ZDB-GENE-040905-3]	0.0492413	-0.0165121	0.0992219	0.0168209	0.0179021	0.00738768	0.148087	0.109721	0.11212	0.132513	0.154482	0.0422913	0.0916453	-0.118266	0.176014	0.0358501
ENSDARG00000090091	SI:CH211-238E22.2	si:ch211-238e22.2 [Source:ZFIN;Acc:ZDB-GENE-041210-346]	-0.079233	0.17258	0.216742	0.0483967	0.000169285	0.0342635	0.263341	-0.0660806	0.240125	0.132341	0.0422808	-0.00228628	0.0790544	0.0924788	0.145128	0.00946126
ENSDARG00000101753	CABZ01085195.1	N/A	-0.00340117	0.00353622	0.0200883	-0.0829315	0.0821041	0.0441932	0.100059	-0.0586543	-0.0505797	0.132293	0.0768874	0.0695783	0.0618815	0.00326462	0.114552	0.0466708
ENSDARG00000091731	CABZ01043952.1	N/A	0.0312731	0.0551486	0.131018	0.0911116	0.0833866	0.105866	0.0793673	0.0794611	0.0704232	0.132137	0.0197448	0.141934	0.0805292	0.0770819	0.0277702	0.088368
ENSDARG00000098707	SI:CH211-212K5.4	si:ch211-212k5.4 [Source:ZFIN;Acc:ZDB-GENE-110914-68]	0.14326	0.0387843	0.121353	0.123336	0.0188961	-0.0167349	0.0767438	-0.0435667	0.130625	0.131886	-0.0199735	0.0382478	0.0622415	0.138377	0.266551	0.0234077
ENSDARG00000057102	BX957274.1	N/A	0.00838491	0.189953	0.203427	0.166565	0.130274	0.167681	0.247027	0.166942	0.145061	0.131885	0.242673	0.204001	0.26294	0.211311	0.185723	0.181869
ENSDARG00000092889	SYCE3	zgc:194246 [Source:ZFIN;Acc:ZDB-GENE-081022-85]	-0.0115922	-0.00913122	-0.0505424	-0.103555	-0.0177277	-0.0543662	0.133818	0.131229	0.288823	0.131854	-0.0648908	0.367864	-0.100386	-0.066613	-0.0640457	-0.00934264
ENSDARG00000095047	SI:DKEY-85K15.4	si:dkey-85k15.4 [Source:ZFIN;Acc:ZDB-GENE-100922-242]	0.142197	0.000805182	0.0396601	0.128423	0.0235718	0.0917913	0.0578558	0.145113	0.108517	0.131686	0.0419464	0.118489	0.0400661	0.0489034	-0.0141979	0.0121757
ENSDARG00000087843	CNTN1A	contactin 1a [Source:ZFIN;Acc:ZDB-GENE-030427-1]	-0.027797	0.134639	-0.0203086	0.0698428	0.272722	0.121857	0.151971	0.143683	0.0417825	0.131452	0.149155	0.00720373	0.0516479	-0.0372048	0.0378819	0.0554218
ENSDARG00000095092	SI:CH211-232M8.3	si:ch211-232m8.3 [Source:ZFIN;Acc:ZDB-GENE-081107-22]	-0.139901	-0.241351	-0.107738	-0.0438738	-0.028666	0.149264	0.137363	-0.140398	0.0746526	0.131349	-0.107954	0.263836	-0.0580198	-0.0155092	-0.0320268	-0.0623079
ENSDARG00000105328	SI:DKEY-23A13.17	si:dkey-23a13.17 [Source:ZFIN;Acc:ZDB-GENE-160113-52]	-0.0213963	0.0341082	0.0336086	0.0048761	0.076461	0.020745	-0.0486128	0.021873	0.0761898	0.131348	0.0198624	0.0383981	0.0622743	0.0703686	0.0589829	0.00973155
ENSDARG00000058716	CEPT1A	choline/ethanolamine phosphotransferase 1a [Source:ZFIN;Acc:ZDB-GENE-081105-47]	0.0800467	-0.0826324	-0.0397607	0.065984	0.0897151	0.183275	0.111121	0.20089	0.15988	0.131094	0.0634662	0.172443	-0.134319	-0.0241773	0.147749	0.0791457
ENSDARG00000097011	HBAA1	hemoglobin, alpha adult 1 [Source:ZFIN;Acc:ZDB-GENE-980526-79]	0.00794507	-0.119363	-0.0847701	0.0997539	-0.115398	0.0558525	0.0460435	0.0250684	-0.105051	0.130833	-0.102358	-0.0225018	-0.0819642	-0.0611013	-0.0927615	0.0320307
ENSDARG00000052893	RX3	retinal homeobox gene 3 [Source:ZFIN;Acc:ZDB-GENE-990415-238]	-0.321658	0.0705325	0.0142258	0.0693007	0.155801	-0.117652	0.066676	0.144798	-0.286401	0.130769	0.172102	-0.0869009	0.132228	-0.122399	-0.0505941	0.264166
ENSDARG00000101689	SI:DKEY-16P6.1	si:dkey-16p6.1 [Source:ZFIN;Acc:ZDB-GENE-081103-43]	-0.167852	-0.0290257	-0.0211565	0.0524523	0.0798839	-0.00151915	-0.010892	-0.1211	0.100646	0.130708	-0.111188	0.0833383	0.0745691	-0.011646	0.107002	-0.0180557
ENSDARG00000094001	SI:DKEY-6A5.3	si:dkey-6a5.3 [Source:ZFIN;Acc:ZDB-GENE-041210-128]	0.0303344	0.186877	0.0342534	0.127013	0.183835	0.0424865	0.10637	0.108782	0.0693127	0.130458	0.1329	-0.0154169	0.12316	0.106288	0.0251579	0.0614272
ENSDARG00000102651	GTPBP2	GTP binding protein 2 [Source:HGNC Symbol;Acc:HGNC:4670]	0.166405	0.363682	0.0969977	0.149052	0.148314	0.266919	0.168729	0.167647	0.224483	0.13036	0.177042	0.0994829	0.180917	0.191433	0.29511	0.130887
ENSDARG00000044155	MAFAA	v-maf avian musculoaponeurotic fibrosarcoma oncogene homolog Aa [Source:ZFIN;Acc:ZDB-GENE-010605-3]	-0.192633	0.0745629	0.131208	-0.233703	0.0969118	-0.145131	0.25514	0.196883	-0.314606	0.130231	-0.206791	-0.0326734	0.109243	-0.214233	0.0544027	-0.0909863
ENSDARG00000098430	ZNF1078	zinc finger protein 1078 [Source:ZFIN;Acc:ZDB-GENE-080218-3]	-0.0186118	0.137276	0.320382	0.090698	0.143582	0.127835	0.371053	0.0962054	0.143746	0.130229	0.0968608	0.260021	0.220256	0.211549	0.473261	-0.0263293
ENSDARG00000104633	CABZ01075125.2	N/A	0.150731	0.0997294	0.217465	0.0865593	0.26398	0.281426	0.24414	0.142527	0.219971	0.130145	0.146262	0.116949	0.171139	0.0601583	0.254808	0.190839
ENSDARG00000101023	MSX2B	muscle segment homeobox 2b [Source:ZFIN;Acc:ZDB-GENE-980526-492]	0.110751	0.470203	0.463162	0.175082	0.424042	0.165327	-0.0232196	0.165126	-0.0335817	0.129792	-0.11875	0.0714412	-0.0696261	-0.022692	-0.0827606	0.0606615
ENSDARG00000099658	CT025651.1	N/A	0.360096	0.405274	0.202533	0.18343	0.154439	0.145741	0.121894	0.0613585	0.104128	0.129778	0.224273	0.203515	0.17934	0.164664	0.0227698	0.2488
ENSDARG00000015343	PGD	phosphogluconate dehydrogenase [Source:ZFIN;Acc:ZDB-GENE-040426-2807]	-0.100976	0.48169	0.0126554	-0.0616902	0.374072	-0.00822388	-0.0394297	0.0906703	0.0606953	0.129747	-0.127936	0.00682596	-0.121027	-0.0777603	-0.0496706	-0.0192456
ENSDARG00000030547	RND1A	Rho family GTPase 1a [Source:ZFIN;Acc:ZDB-GENE-040630-6]	-0.129037	0.00318822	0.159439	0.172693	0.120991	-0.195784	0.161619	0.0287041	-0.341694	0.129568	0.173749	0.0410292	0.173686	0.162004	-0.077495	0.115236
ENSDARG00000070858	SI:BUSM1-105L16.2	si:busm1-105l16.2 [Source:ZFIN;Acc:ZDB-GENE-030616-108]	-0.0416637	-0.0303556	0.0738945	0.0967997	0.0459077	0.098363	0.200104	-0.0400031	0.071927	0.129381	-0.0454057	0.0193562	0.104681	-0.0155718	0.116009	0.0158824
ENSDARG00000030408	RPS26L	ribosomal protein S26, like [Source:ZFIN;Acc:ZDB-GENE-040426-1706]	0.111119	0.0833655	-0.131347	-0.0599268	0.137679	0.165057	0.048934	0.133386	0.284084	0.129373	-0.0606143	0.0828759	-0.067957	-0.107827	0.00607022	-0.0845547
ENSDARG00000018383	FRZB	frizzled-related protein [Source:ZFIN;Acc:ZDB-GENE-990715-1]	-0.0157389	0.368817	0.309225	0.0409231	0.261429	0.0582805	0.155566	0.106935	-0.0625909	0.129333	0.157996	0.125613	0.107317	0.112382	-0.00234957	0.0393954
ENSDARG00000099736	CABZ01075078.1	N/A	0.0274632	0.0446487	0.124289	0.0489936	0.0824126	0.00328023	0.064949	0.059661	0.0102806	0.129223	0.109446	0.0702189	0.077599	0.00899011	0.0905996	0.0505798
ENSDARG00000070389	FOXF2B	forkhead box F2b [Source:ZFIN;Acc:ZDB-GENE-041001-130]	0.104156	0.310625	0.313849	0.111813	0.167789	0.099031	0.134093	-0.0484742	0.0133979	0.129003	0.0364251	0.00492084	0.101708	0.222043	0.0612405	0.0658418
ENSDARG00000074285	SI:CH73-335M24.2	si:ch73-335m24.2 [Source:ZFIN;Acc:ZDB-GENE-100922-203]	-0.201555	-0.226981	0.0221702	-0.225396	0.218153	-0.0789917	0.249001	-0.0855676	-0.283513	0.128988	-0.110102	0.0133556	-0.0866584	-0.021059	-0.0539625	0.156659
ENSDARG00000101528	SI:CH211-194H1.2	si:ch211-194h1.2 [Source:ZFIN;Acc:ZDB-GENE-110913-110]	-0.015595	-1.44e-05	0.0326377	0.0680763	0.0798884	0.052631	0.0934506	0.0401006	0.104586	0.128914	0.0426508	0.0643727	0.0718364	0.0897199	0.165644	0.103563
ENSDARG00000093058	SI:DKEY-13I19.8	si:dkey-13i19.8 [Source:ZFIN;Acc:ZDB-GENE-041210-156]	0.0222063	0.0631643	0.16044	0.00354576	-0.0478643	0.251952	0.0599041	0.120459	0.198624	0.128856	0.0175709	0.113068	0.00691118	0.00745368	0.22447	-0.00127835
ENSDARG00000090169	SI:DKEY-1F1.3	si:dkey-1f1.3 [Source:ZFIN;Acc:ZDB-GENE-130531-67]	0.143301	0.191736	0.0669916	0.178914	0.149441	0.176394	0.0619875	0.0670209	0.139749	0.12878	0.0276572	0.0701224	-0.0106542	0.211233	0.00910801	0.144076
ENSDARG00000098062	BX511215.1	N/A	-0.140451	0.157199	0.151767	0.0981851	0.0172948	0.0474615	0.258251	0.0884961	0.0532934	0.128564	0.187737	0.125945	0.00564671	0.206732	0.178962	-0.0153716
ENSDARG00000102748	CABZ01074745.1	N/A	0.223164	0.0869433	-0.0157708	-0.136428	0.0600024	0.20782	0.0511692	0.172472	0.399952	0.128481	-0.0213459	-0.06342	0.00857541	-0.171767	0.264787	-0.0410886
ENSDARG00000056781	ZANL	zonadhesin, like [Source:ZFIN;Acc:ZDB-GENE-060131-2]	0.10631	0.1334	0.0454693	0.11835	0.121559	0.114623	0.0940931	0.0804171	0.118736	0.128469	0.114272	0.130306	0.156231	0.0768709	0.169298	0.00386142
ENSDARG00000076126	CU695215.1	N/A	-0.0877916	0.156207	0.114439	-0.125317	0.0968418	-0.0478963	0.00562345	0.0146483	-0.180471	0.128413	0.0168708	-0.121952	0.0487592	-0.218927	-0.0557195	-0.0846502
ENSDARG00000089556	SI:DKEY-63J12.4	si:dkey-63j12.4 [Source:ZFIN;Acc:ZDB-GENE-040724-17]	0.0536409	0.275575	0.119512	0.0864866	0.12651	0.127809	0.0792753	0.0871194	0.10005	0.128012	0.216689	0.0651832	0.269676	0.140316	0.0985716	0.200125
ENSDARG00000102032	CABZ01063601.1	N/A	0.00986374	0.134731	0.118622	-0.302154	0.0241814	0.0326006	0.173214	0.184576	-0.031541	0.127998	-0.0863309	0.141652	0.108343	-0.101523	-0.0179964	-0.0403597
ENSDARG00000102873	CT956002.2	N/A	-0.10431	-0.0561912	0.00538167	0.24671	0.0271162	0.1123	0.172783	0.111295	0.126514	0.127981	-0.00391791	0.124692	-0.175061	-0.0714779	0.0767972	-0.0459742
ENSDARG00000104181	TMSB1	thymosin beta 1 [Source:ZFIN;Acc:ZDB-GENE-030131-8575]	-0.0339166	0.0865339	-0.0496878	-0.0391287	0.169784	0.194685	0.15246	0.0966446	0.023009	0.127949	0.0105303	0.0156748	-0.012712	0.00644022	0.132545	-0.0766599
ENSDARG00000059885	FRMD3	FERM domain containing 3 [Source:ZFIN;Acc:ZDB-GENE-070523-1]	-0.00815055	-0.0199935	0.0660632	0.0366919	0.160041	0.183255	0.00819488	0.189437	0.0681556	0.127876	0.182524	-0.0906287	0.060898	-0.0162193	-0.00145139	-0.193525
ENSDARG00000102343	SI:DKEY-243K1.3	si:dkey-243k1.3 [Source:ZFIN;Acc:ZDB-GENE-131121-191]	-0.0414236	-0.0450396	-0.027114	-0.0996491	-0.101381	-0.060043	-0.03484	-0.0151361	-0.11783	0.12781	-0.0695818	-0.0443816	-0.0558545	-0.120896	-0.0897804	-0.0280255
ENSDARG00000056877	VAMP2	vesicle-associated membrane protein 2 [Source:ZFIN;Acc:ZDB-GENE-030131-8225]	-0.272495	-0.082533	-0.0820275	-0.0250032	0.133078	-0.120237	0.10176	0.0850772	-0.135794	0.127664	-0.0241741	-0.00732993	-0.208013	-0.172204	-0.083306	-0.0300091
ENSDARG00000073874	CRYGM2D6	crystallin, gamma M2d6 [Source:ZFIN;Acc:ZDB-GENE-040625-145]	-0.312541	-0.222993	0.00783232	-0.0640269	0.289936	-0.100568	0.194911	0.10883	-0.0166438	0.127554	-0.0123258	0.0351208	-0.023221	-0.158022	-0.169329	-0.0901269
ENSDARG00000020364	FBP1B	fructose-1,6-bisphosphatase 1b [Source:ZFIN;Acc:ZDB-GENE-021206-11]	0.0232396	-0.0484396	-0.0271667	-0.130923	-0.121973	0.323572	0.155024	0.159352	0.215234	0.127536	0.0781805	0.0896975	0.129934	-0.0197438	0.0938472	0.0255548
ENSDARG00000056638	PIR	pirin [Source:ZFIN;Acc:ZDB-GENE-040718-288]	-0.151414	0.712402	-0.0945877	-0.00694647	0.300434	-0.0703708	-0.073703	-0.00912132	0.0552096	0.127029	-0.352735	0.0476006	-0.162656	-0.0394373	-0.153329	-0.0453029
ENSDARG00000095512	RCA2.2	regulator of complement activation group 2 gene 2 [Source:ZFIN;Acc:ZDB-GENE-060503-646]	-0.070019	0.00844116	0.0518608	0.105503	-0.0699323	0.223442	0.0246724	0.075268	0.0848448	0.126947	0.100993	0.276076	0.0366351	0.00448788	0.0421417	0.042982
ENSDARG00000001721	OC90	otoconin 90 [Source:ZFIN;Acc:ZDB-GENE-070912-300]	0.801967	0.203058	0.242005	0.141263	0.231287	0.777425	0.0699412	0.133816	0.437172	0.126619	0.336655	-0.10279	0.348513	0.0766008	0.490316	0.160995
ENSDARG00000002193	RHO	rhodopsin [Source:ZFIN;Acc:ZDB-GENE-990415-271]	-0.133258	0.19376	0.177648	-0.0257997	0.144456	-0.362832	0.244627	0.184544	-0.122368	0.126543	0.024561	-0.0120347	0.0966721	0.00202896	0.425059	0.00756705
ENSDARG00000088453	OR111-7	odorant receptor, family D, subfamily 111, member 7 [Source:ZFIN;Acc:ZDB-GENE-000329-15]	0.040457	0.0674208	0.00370515	-0.0273218	-0.0037208	0.0216551	0.130301	-0.0440761	-0.00347338	0.126351	-0.0776992	0.000323992	-0.00239446	0.0145858	-0.017416	-0.0522983
ENSDARG00000086692	TAAR14A	trace amine associated receptor 14a [Source:ZFIN;Acc:ZDB-GENE-041014-30]	0.0754085	0.101871	0.040422	0.108472	0.038385	0.0661256	0.169456	0.0619163	0.138366	0.125728	0.0452913	0.138339	0.105566	0.0937695	0.0960632	0.142507
ENSDARG00000091348	RTN3	reticulon 3 [Source:ZFIN;Acc:ZDB-GENE-030710-5]	-0.027923	-0.0473577	0.00873544	-0.0869063	-0.0273552	0.0158034	0.0286039	0.148741	0.0108808	0.125631	-0.0574612	0.0528707	-0.181865	-0.181673	0.141219	-0.0436203
ENSDARG00000101388	SI:CH211-171L17.14	si:ch211-171l17.14 [Source:ZFIN;Acc:ZDB-GENE-070912-153]	0.19039	0.26434	0.289193	0.270794	0.193939	0.267075	0.203539	0.0834042	0.0321282	0.125573	0.200639	-0.0116949	0.175078	0.147622	0.24555	0.276632
ENSDARG00000094929	APOA4B.3	apolipoprotein A-IV b, tandem duplicate 3 [Source:ZFIN;Acc:ZDB-GENE-100921-47]	0.163317	-0.19801	0.1663	-0.120672	0.283633	-0.0480762	0.460217	0.446631	0.259781	0.12551	0.151785	-0.135324	0.150174	-0.0198151	0.0319046	0.0409589
ENSDARG00000012504	RLBP1A	retinaldehyde binding protein 1a [Source:ZFIN;Acc:ZDB-GENE-040426-1662]	-0.429682	0.0936963	0.0913809	-0.0361644	0.18622	-0.536395	0.265177	0.204855	-0.364898	0.125361	-0.0284497	-0.00927978	-0.105991	-0.0168412	-0.182544	0.168965
ENSDARG00000099915	P2RY2.1	purinergic receptor P2Y, G-protein coupled, 2, tandem duplicate 1 [Source:ZFIN;Acc:ZDB-GENE-091204-455]	-0.146614	-0.0220435	0.0476281	0.0811863	0.00376082	0.0643998	0.00733597	-0.123323	0.0401375	0.125157	0.0202388	0.0734179	-0.095235	0.0616011	0.0435335	0.0279209
ENSDARG00000104950	SI:CH211-198C1.4	si:ch211-198c1.4 [Source:ZFIN;Acc:ZDB-GENE-141211-3]	-0.114267	-0.156547	-0.171111	-0.119237	-0.153197	0.205273	-0.191709	0.0461314	0.0760026	0.124285	-0.165266	0.149318	-0.120721	0.00248197	0.0706748	0.0094453
ENSDARG00000015611	RASL11B	RAS-like, family 11, member B [Source:ZFIN;Acc:ZDB-GENE-040426-793]	-0.0609135	-0.151113	0.0169471	-0.0743888	0.082241	-0.0197062	-0.0114141	-0.0384717	-0.105883	0.1242	0.17429	-0.0032079	0.177534	0.0772278	-0.105783	0.0737825
ENSDARG00000099447	PCDH1G18	protocadherin 1 gamma 18 [Source:ZFIN;Acc:ZDB-GENE-050609-13]	-0.122597	-0.00447605	0.0255356	-0.0344409	0.116907	-0.169969	0.209418	0.167337	-0.143055	0.123949	0.0367205	0.0966491	-0.000358464	-0.133604	-0.0697919	-0.0572903
ENSDARG00000093811	SI:DKEYP-2C8.3	si:dkeyp-2c8.3 [Source:ZFIN;Acc:ZDB-GENE-081031-97]	0.0786732	-0.0210291	-0.0885391	-0.0394696	0.0082862	0.0398465	0.0897779	0.0163301	0.0413094	0.123676	-0.045462	-0.075117	-0.0914914	-0.156046	0.00759446	-0.0868635
ENSDARG00000061338	DDX6	DEAD (Asp-Glu-Ala-Asp) box helicase 6 [Source:ZFIN;Acc:ZDB-GENE-070912-83]	-0.0167644	0.133075	0.0945032	0.070825	-0.0404864	0.0513207	0.0729462	0.191939	0.152267	0.12367	0.0141591	0.086239	-0.0286252	-0.080279	0.16574	0.00821768
ENSDARG00000104537	COX7C	cytochrome c oxidase, subunit VIIc [Source:ZFIN;Acc:ZDB-GENE-030131-8062]	0.0290804	0.00235213	-0.314495	-0.199256	0.013938	0.0745413	-0.020997	0.012753	0.110346	0.123491	-0.233168	0.0111991	-0.358526	-0.33922	0.038485	-0.287693
ENSDARG00000013763	RRBP1A	ribosome binding protein 1a [Source:ZFIN;Acc:ZDB-GENE-030131-9795]	0.184093	0.0800719	0.00710889	0.134629	0.0410884	0.0966147	0.099593	0.214963	0.0269764	0.123406	0.0778803	0.0693411	0.0366764	-0.0201794	0.0621269	0.000874687
ENSDARG00000100329	ZNF1056	zinc finger protein 1056 [Source:ZFIN;Acc:ZDB-GENE-131122-90]	0.00775261	0.0256173	0.0834221	0.00561869	0.0893184	0.0606538	0.0307752	0.0414848	0.0565262	0.123283	-0.0120658	0.065898	0.100129	0.0240754	0.10856	0.0683911
ENSDARG00000094433	CASPBL	caspase b, like [Source:ZFIN;Acc:ZDB-GENE-090311-53]	0.110845	-0.0273707	-0.018475	0.125548	-0.098891	0.166985	0.0344785	0.121327	0.0296889	0.123168	0.0315584	-0.0149773	0.102394	0.126862	-0.0720786	0.0695345
ENSDARG00000090708	SI:DKEY-28G23.6	si:dkey-28g23.6 [Source:ZFIN;Acc:ZDB-GENE-131119-80]	-0.0769233	0.00969748	0.0861926	-0.0101001	0.0908425	0.0230746	-0.0366218	0.0906711	0.0932521	0.12315	-0.0454033	-0.0162863	-0.00762215	0.107925	-0.0316291	0.0699083
ENSDARG00000025465	SPON2A	spondin 2a, extracellular matrix protein [Source:ZFIN;Acc:ZDB-GENE-990415-160]	-0.0658981	0.237665	0.259475	-0.306884	0.0835189	0.0147469	0.191171	0.131354	0.0567532	0.123086	0.0520359	0.0313723	-0.0102078	-0.00529436	0.0142848	-0.0389894
ENSDARG00000104519	KDELR3	KDEL endoplasmic reticulum protein retention receptor 3 [Source:HGNC Symbol;Acc:HGNC:6306]	0.309019	0.314868	0.458621	0.31269	0.337195	0.45	0.207877	0.295543	0.183134	0.122992	0.465531	0.263477	0.259456	0.24427	0.237618	0.47064
ENSDARG00000091086	ALX3	ALX homeobox 3 [Source:ZFIN;Acc:ZDB-GENE-120221-3]	0.0171149	-0.0683753	0.0732554	-0.145809	0.00438565	0.0621538	0.00514666	0.152655	0.174257	0.122983	0.109301	-0.0283225	0.053537	-0.0677852	-0.0132455	-0.0715944
ENSDARG00000105386	BX005156.3	N/A	0.327711	0.127365	0.0879573	0.0959863	-0.0495408	0.207273	-0.0143386	0.0253984	0.0792833	0.122846	0.208943	0.136885	0.191966	0.246872	0.181655	0.161321
ENSDARG00000104196	FQ311895.1	N/A	-0.198043	-0.114882	0.0485523	-0.0435315	0.116825	0.0338536	0.0972271	-0.00413856	0.0652268	0.122328	0.145913	0.0210367	0.0234885	-0.164803	-0.0701106	0.000405773
ENSDARG00000092119	SI:CH211-235F12.2	si:ch211-235f12.2 [Source:ZFIN;Acc:ZDB-GENE-050419-113]	-0.00419095	0.041677	0.00755953	-0.110802	-0.0439547	0.0236804	0.117681	0.0400544	0.198599	0.122308	-0.0628146	0.0573344	-0.067254	-0.121508	0.176275	-0.103773
ENSDARG00000008030	MYL9B	myosin, light chain 9b, regulatory [Source:ZFIN;Acc:ZDB-GENE-040426-2296]	0.0883626	0.0583356	0.137697	0.000901317	0.0577665	0.240179	0.208606	0.136048	0.0271543	0.121815	-0.0872575	0.0754768	-0.101879	-0.140201	0.0744003	-0.0555132
ENSDARG00000061541	UNC5DB	unc-5 netrin receptor Db [Source:ZFIN;Acc:ZDB-GENE-060531-162]	-0.0399217	0.232926	0.209126	-0.00592594	0.104181	-0.144517	0.283434	-0.0191871	0.0102059	0.12162	0.153956	-0.0143263	0.0319407	0.131583	0.18867	0.0484448
ENSDARG00000034007	PROM1B	prominin 1 b [Source:ZFIN;Acc:ZDB-GENE-031003-1]	-0.767544	-0.114998	0.145521	-0.177506	-0.00351583	-0.755764	0.140142	0.0770894	-0.78626	0.121555	-0.119385	-0.169064	-0.105396	-0.116213	-0.231696	-0.043858
ENSDARG00000091808	BX897726.1	N/A	0.149783	-0.127611	-0.177931	-0.0366688	-0.133187	0.129597	-0.045014	-0.114573	0.0301596	0.121327	-0.174337	-0.0238326	-0.0643747	0.0484144	0.0423154	-0.0162252
ENSDARG00000036577	ATP6V0CB	ATPase, H+ transporting, lysosomal, V0 subunit cb [Source:ZFIN;Acc:ZDB-GENE-030131-4127]	-0.0942923	-0.0518878	-0.00109739	-0.0991055	-0.160581	-0.211509	0.204409	0.415099	-0.207486	0.121259	0.193816	0.0943451	0.249186	0.0510904	0.122671	0.064862
ENSDARG00000099715	SI:DKEY-152B24.7	si:dkey-152b24.7 [Source:ZFIN;Acc:ZDB-GENE-100921-77]	0.0815138	0.126482	0.186114	0.0473833	0.216549	0.176242	0.270969	0.208169	0.168401	0.121122	0.117422	-0.0455382	0.121268	0.221736	0.0875173	0.1215
ENSDARG00000052279	OSGN1	oxidative stress induced growth inhibitor 1 [Source:ZFIN;Acc:ZDB-GENE-040426-864]	0.186183	-0.0231315	-0.509704	0.241227	-0.171805	0.303984	-0.244466	-0.114836	0.13324	0.121118	0.00772496	-0.0662754	-0.00599319	0.00691887	0.111346	-0.148508
ENSDARG00000036135	BBOX1	butyrobetaine (gamma), 2-oxoglutarate dioxygenase (gamma-butyrobetaine hydroxylase) 1 [Source:ZFIN;Acc:ZDB-GENE-050417-218]	-0.109342	-0.0733326	-0.0132187	-0.211629	-0.0340222	0.342352	0.0993042	0.122141	-0.205364	0.120593	-0.157033	-0.183998	-0.0768987	-0.263107	-0.0459478	-0.0589803
ENSDARG00000039601	IER3IP1	immediate early response 3 interacting protein 1 [Source:ZFIN;Acc:ZDB-GENE-050506-106]	0.122063	0.106001	0.0637008	0.0467237	0.255156	0.151011	0.0594429	0.0954017	0.080848	0.120508	0.151682	0.0557463	-0.06846	0.120653	0.0176999	0.101354
ENSDARG00000045979	ZGC:153704	zgc:153704 [Source:ZFIN;Acc:ZDB-GENE-060929-1114]	-0.23554	-0.0639927	-0.0484264	0.0116737	0.19343	-0.241384	0.221015	0.0641173	-0.154923	0.120474	-0.100541	-0.0145683	-0.189453	-0.0426042	-0.0236013	-0.0818504
ENSDARG00000027538	NOXRED1	NADP-dependent oxidoreductase domain containing 1 [Source:ZFIN;Acc:ZDB-GENE-130530-573]	0.0825779	0.0685073	0.099921	0.107357	0.0624457	-0.000114811	0.0463919	0.135731	0.0752819	0.120287	0.101177	0.132708	0.158753	0.157731	0.0776608	0.0459025
ENSDARG00000041960	OLFM4	si:ch211-173a9.6 [Source:ZFIN;Acc:ZDB-GENE-030131-4623]	-0.191393	-0.076839	-0.138943	0.0121564	0.124598	0.113024	-0.0110713	0.172819	0.0127779	0.119764	-0.100159	-0.128293	-0.00264588	0.000696285	-0.0123945	0.0124705
ENSDARG00000062906	KCNV2B	potassium channel, subfamily V, member 2b [Source:ZFIN;Acc:ZDB-GENE-060526-28]	-0.237006	0.00117889	0.153859	0.00102144	-0.00454116	-0.182785	0.128614	0.169786	-0.10765	0.119609	-0.0142459	-0.0454193	0.186897	0.0712078	-0.0361847	0.0630756
ENSDARG00000069189	SI:DKEY-242H9.3	si:dkey-242h9.3 [Source:ZFIN;Acc:ZDB-GENE-060503-347]	-0.0695421	0.0123508	0.0244641	0.067979	-0.052593	-0.0834023	-0.0728412	0.0252311	-0.0154952	0.119519	-0.0692912	-0.0480024	-0.0309215	-0.0223815	0.0384659	-0.0397751
ENSDARG00000070274	CR407594.1	N/A	0.0829318	0.0412519	0.110674	0.0709221	0.00220236	0.0312518	0.0309971	0.143146	0.0878621	0.119494	0.162324	0.0225561	0.105689	0.183833	0.102423	0.101206
ENSDARG00000101919	FOXJ1A	forkhead box J1a [Source:ZFIN;Acc:ZDB-GENE-060929-1178]	0.473774	0.0750999	0.294827	0.0874364	0.0634815	0.325137	0.0548663	0.0466728	0.176371	0.119483	0.0532107	0.116513	0.172567	0.21298	0.290951	0.179122
ENSDARG00000100977	GOLIM4A	golgi integral membrane protein 4a [Source:ZFIN;Acc:ZDB-GENE-041026-2]	0.0251217	0.134959	0.135335	0.157673	0.180599	0.0368553	0.100625	-0.00482053	0.123905	0.119412	0.189254	0.027915	0.155821	-0.0473818	0.0852131	0.0371345
ENSDARG00000009753	SF3B6	splicing factor 3b, subunit 6 [Source:ZFIN;Acc:ZDB-GENE-040625-36]	0.187016	0.117022	0.193957	-0.148042	-0.13206	0.195265	0.0214226	0.130474	0.216497	0.119321	0.0297116	0.119673	0.00711644	0.103124	0.179366	0.0430524
ENSDARG00000090366	ZNF1065	zinc finger protein 1065 [Source:ZFIN;Acc:ZDB-GENE-071004-94]	0.0942829	0.135508	0.164478	0.0691104	0.0469031	0.100049	0.0925732	0.113933	0.152779	0.119261	0.132806	0.0822243	0.0960306	0.0975354	0.0361565	0.0554398
ENSDARG00000099719	CDKN1D	cyclin-dependent kinase inhibitor 1D [Source:ZFIN;Acc:ZDB-GENE-110215-1]	-0.210755	0.121527	0.193837	-0.233188	0.103484	-0.379974	0.3114	0.202167	-0.342213	0.119252	-0.225624	0.125932	0.255209	0.0228783	0.0743318	-0.0828852
ENSDARG00000102716	AL645691.3	N/A	0.253672	0.295406	0.11138	0.0593251	0.0512251	0.154468	0.127245	0.0287892	0.151878	0.119157	0.0127153	-0.0317534	0.219978	-0.0642349	0.0510682	0.106072
ENSDARG00000015678	SI:DKEYP-75B4.9	si:dkeyp-75b4.9 [Source:ZFIN;Acc:ZDB-GENE-090313-396]	0.0585576	0.0287412	0.0745323	0.222102	0.0720496	0.224722	0.0573992	0.0800087	0.0331629	0.119154	0.110127	0.0527433	-0.00782379	0.0612524	0.136192	0.157874
ENSDARG00000030110	MYOD1	myogenic differentiation 1 [Source:ZFIN;Acc:ZDB-GENE-980526-561]	0.176843	0.0595178	0.03732	-0.0115539	-0.070736	0.204511	0.062904	0.186055	0.0887532	0.118879	0.0457247	0.0735667	0.0253395	-0.0870905	0.172856	0.0250593
ENSDARG00000022918	TBCC	tubulin folding cofactor C [Source:ZFIN;Acc:ZDB-GENE-041008-103]	-0.0268985	0.0642555	0.0799825	0.134863	0.158314	0.0296395	0.0687388	0.0274426	-0.0926068	0.118806	0.140368	-0.0561363	-0.0929196	0.025764	-0.00625778	-0.10424
ENSDARG00000010130	SMPDL3B	sphingomyelin phosphodiesterase, acid-like 3B [Source:ZFIN;Acc:ZDB-GENE-041008-132]	0.0612878	-0.135115	0.0348995	0.306155	-0.152571	-0.210905	-0.219727	0.0383833	0.11008	0.118789	-0.099415	0.217312	-0.0824982	0.0144101	0.0457251	-0.00817689
ENSDARG00000092094	SI:DKEY-112G5.11	si:dkey-112g5.11 [Source:ZFIN;Acc:ZDB-GENE-081028-22]	-0.0155149	-0.0308093	0.0761867	0.00930169	0.0965709	-0.00178265	0.0577674	0.0593009	-0.0171978	0.118777	0.0196672	0.130345	0.0218582	0.00495653	0.0269201	-0.0191299
ENSDARG00000010145	TOR4AA	torsin family 4, member Aa [Source:ZFIN;Acc:ZDB-GENE-050417-9]	0.214388	-0.0649307	0.15792	0.0774444	0.0380116	0.239506	0.0408441	0.0713657	0.205623	0.118745	0.135027	0.100644	0.114937	0.127427	0.224693	0.169926
ENSDARG00000003210	ANO2	si:ch73-86n2.1 [Source:ZFIN;Acc:ZDB-GENE-091204-400]	-0.188575	-0.00260619	0.278669	0.0409966	0.0959192	-0.207516	0.0778921	0.130455	-0.417132	0.118608	-0.0182115	-0.00266154	0.0798562	-0.0577053	-0.0296232	0.0344712
ENSDARG00000004358	GNB3A	guanine nucleotide binding protein (G protein), beta polypeptide 3a [Source:ZFIN;Acc:ZDB-GENE-040718-134]	-0.910125	-0.0319372	0.133627	-0.153953	0.135482	-0.860722	0.3116	0.0853027	-0.851478	0.118342	-0.127633	-0.0392633	-0.0594634	-0.179846	-0.154906	0.018328
ENSDARG00000068407	SIX9	SIX homeobox 9 [Source:ZFIN;Acc:ZDB-GENE-990621-11]	0.0181186	0.0183196	0.0833469	0.0110371	0.0131784	0.0288088	0.0368711	0.0160869	0.0696635	0.118328	0.0834421	-0.0125707	0.0390546	0.0970734	0.0307063	0.0443371
ENSDARG00000076106	FTR43	finTRIM family, member 43 [Source:ZFIN;Acc:ZDB-GENE-090507-8]	0.064783	-0.0108814	0.0369516	0.0621046	0.000811203	0.0825323	-0.0383039	-0.0287142	0.0813953	0.118295	0.0363001	-0.0495981	-0.00615647	0.0996884	0.045296	0.0270074
ENSDARG00000094310	SI:CH211-255G12.6	si:ch211-255g12.6 [Source:ZFIN;Acc:ZDB-GENE-081104-198]	-0.340497	-0.1987	-0.120691	-0.0393597	-0.0706427	-0.444666	-0.0105888	-0.032349	-0.339252	0.118241	-0.253674	0.0421051	-0.148384	-0.192145	-0.109927	-0.277
ENSDARG00000087318	JAC10	jacalin 10 [Source:ZFIN;Acc:ZDB-GENE-071004-126]	0.07633	-0.11599	-0.0503189	-0.0723037	-0.020697	-0.0606324	0.105532	0.0752424	0.00709482	0.11822	-0.0958687	0.0962546	-0.0103814	-0.166653	0.0526659	-0.106166
ENSDARG00000089806	SI:DKEY-239J18.3	si:dkey-239j18.3 [Source:ZFIN;Acc:ZDB-GENE-121214-39]	0.289555	0.124445	-0.00777589	0.267139	0.0765074	0.35714	-0.0741221	0.00283474	0.0908025	0.118117	0.226416	0.0726392	0.108315	0.234148	0.046007	-0.0167854
ENSDARG00000092285	CENPV	centromere protein V [Source:ZFIN;Acc:ZDB-GENE-060526-76]	0.268334	0.00759679	0.141934	0.0466673	0.0589245	0.236855	-0.0523818	0.130515	0.120388	0.117984	0.173716	0.0935773	0.194472	0.0363941	-0.103651	-0.0860258
ENSDARG00000073720	SI:DKEY-250L23.4	si:dkey-250l23.4 [Source:ZFIN;Acc:ZDB-GENE-081104-393]	-0.0914096	-0.0983663	0.10297	0.116764	-0.0254241	0.126891	0.121499	0.0494996	0.00623119	0.117911	0.126238	0.0118011	0.175356	0.164737	0.0850189	0.111823
ENSDARG00000098192	CABZ01002718.1	N/A	0.119896	-0.029786	-0.0695437	0.110031	-0.351868	-0.156561	-0.0992682	-0.268359	0.0709969	0.117765	0.033561	-0.0221099	0.0300559	0.26974	-0.08867	-0.16714
ENSDARG00000040190	QDPRA	quinoid dihydropteridine reductase a [Source:ZFIN;Acc:ZDB-GENE-070705-197]	-0.0692652	0.266041	-0.0774768	0.0738525	-0.0842137	0.184307	-0.308427	-0.15895	0.131965	0.11776	-0.305419	0.124036	-0.283767	-0.131809	-0.011646	-0.0196815
ENSDARG00000091169	TOR4AB	torsin family 4, member Ab [Source:ZFIN;Acc:ZDB-GENE-070705-135]	0.15235	0.0328159	0.0600917	0.0415749	0.0270595	0.0764719	0.0667391	0.036797	0.0647716	0.117587	0.0680571	0.00975123	0.0823229	0.105191	0.0160691	0.0516418
ENSDARG00000032272	SAT1B	spermidine/spermine N1-acetyltransferase 1b [Source:ZFIN;Acc:ZDB-GENE-041001-39]	-0.200148	-0.00820044	0.123519	0.0590771	-0.134887	-0.146889	-0.070001	-0.0534693	0.0643073	0.117583	-0.148815	0.10644	-0.0216833	-0.0346202	0.184218	-0.0422116
ENSDARG00000037874	CYP3C2	cytochrome P450, family 3, subfamily c, polypeptide 2 [Source:ZFIN;Acc:ZDB-GENE-081103-62]	-0.00362101	0.0888451	-0.114165	-0.0599769	-0.0396014	-0.128615	-0.0317374	-0.0298821	-0.0797639	0.117564	-0.0463119	0.0619353	0.0181736	-0.120949	0.193866	-0.000654923
ENSDARG00000106512	BX324003.4	N/A	-0.023143	0.201346	0.106021	0.114069	0.2955	0.0656125	0.139643	0.175593	0.0931965	0.117446	0.25038	0.153296	0.104017	0.0869403	0.287221	0.042252
ENSDARG00000019332	NDUFB4	expressed sequence CO360592 [Source:ZFIN;Acc:ZDB-GENE-071015-3]	-0.114917	0.0710438	-0.120392	-0.0490146	0.158798	0.0652353	-0.0603852	0.00370948	0.0878302	0.117363	-0.114469	-0.0388268	-0.176421	-0.212829	0.00598105	-0.155126
ENSDARG00000033832	AMPD1	adenosine monophosphate deaminase 1 (isoform M) [Source:ZFIN;Acc:ZDB-GENE-040426-1906]	-0.633702	0.0110003	0.0807561	-0.0858613	0.343543	-0.50686	0.149016	0.133096	-0.512178	0.11726	-0.134115	-0.0101573	-0.0373637	-0.173941	-0.202531	0.0048404
ENSDARG00000094881	SI:CH211-197H24.8	si:ch211-197h24.8 [Source:ZFIN;Acc:ZDB-GENE-100922-207]	-0.0964892	-0.229986	-0.0539004	-0.0548532	-0.00609142	-0.092495	0.0276617	0.0744431	-0.223792	0.117068	-0.27771	-0.115903	-0.119006	-0.343515	-0.126411	-0.110895
ENSDARG00000101407	TGM1L4	transglutaminase 1 like 4 [Source:ZFIN;Acc:ZDB-GENE-050913-29]	0.0966342	-0.214534	-0.0399115	0.17487	0.214977	0.108447	0.0444991	0.0223229	-0.0309963	0.116795	-0.155446	0.0109488	0.0366264	-0.0780503	0.0340173	-0.00783579
ENSDARG00000040284	SI:DKEY-79D12.5	si:dkey-79d12.5 [Source:ZFIN;Acc:ZDB-GENE-131127-429]	0.237	0.081192	0.225151	0.167478	0.162905	0.639574	0.00587835	0.214317	0.136611	0.116223	0.118947	0.104554	-0.0222661	0.156187	0.228172	0.169268
ENSDARG00000078624	ARHGEF9B	Cdc42 guanine nucleotide exchange factor (GEF) 9b [Source:ZFIN;Acc:ZDB-GENE-030131-7745]	0.0478424	0.102334	0.277911	0.212667	0.0331571	-0.00838021	0.151125	0.155015	-0.099765	0.115957	0.0378688	-0.0167268	0.161931	0.141232	-0.0192612	0.123088
ENSDARG00000093606	RPS11	si:dkey-159f12.2 [Source:ZFIN;Acc:ZDB-GENE-081105-168]	0.108241	0.18388	0.0722888	0.107754	0.0659787	0.197318	0.123668	0.0441551	0.233304	0.1158	0.00158218	0.0744816	-0.0159449	0.216352	0.0139204	0.0470725
ENSDARG00000038248	GGACT.2	gamma-glutamylamine cyclotransferase, tandem duplicate 2 [Source:ZFIN;Acc:ZDB-GENE-040912-8]	0.260239	0.0497947	0.0958888	0.165428	0.0581604	0.157069	-0.019266	0.205768	0.0822397	0.115785	-0.00688696	0.16793	0.0586426	0.131257	0.0255536	-0.0591657
ENSDARG00000089159	ACOT14	acyl-CoA thioesterase 14 [Source:ZFIN;Acc:ZDB-GENE-041210-202]	0.0705873	0.0291168	0.139437	0.221268	0.194874	0.0533613	0.0709228	0.0163755	0.105122	0.115761	0.213576	0.128803	0.131216	0.128919	-0.0545235	0.112055
ENSDARG00000015559	FSTL1A	follistatin-like 1a [Source:ZFIN;Acc:ZDB-GENE-030131-4148]	0.0601883	0.177953	0.0443768	0.172033	0.131515	0.146183	0.0295457	-0.0367779	0.12401	0.115693	0.137196	0.0811674	0.0489705	0.14967	0.0109083	0.187832
ENSDARG00000099056	CABZ01065076.1	N/A	0.227017	0.124524	-0.158633	0.329952	-0.00918042	0.354979	-0.00967491	0.178775	0.538096	0.115432	-0.0485556	0.199048	0.0983411	0.159509	0.0725523	0.0415245
ENSDARG00000103371	SI:DKEY-190J3.6	si:dkey-190j3.6 [Source:ZFIN;Acc:ZDB-GENE-050208-480]	0.0481284	0.354333	0.144168	0.0955185	0.116611	0.183793	0.276057	0.0656957	0.11905	0.115331	0.154418	0.140045	0.132024	0.111903	0.240272	0.226421
ENSDARG00000098309	CR524823.1	N/A	0.090517	0.158456	0.0603275	-0.0402052	0.0838153	0.166281	-0.0707989	0.00625945	0.0580543	0.115025	-0.00805626	0.00719252	0.0585021	0.0168307	0.0193444	0.0217761
ENSDARG00000040286	UBL7B	ubiquitin-like 7b (bone marrow stromal cell-derived) [Source:ZFIN;Acc:ZDB-GENE-040426-1334]	0.0253019	0.0979913	0.00943391	0.22818	0.179096	0.15702	-0.021245	0.0201397	0.0910963	0.114932	0.19175	-0.0228742	0.038124	0.00373769	0.0500735	0.136661
ENSDARG00000099276	UGT5B3	UDP glucuronosyltransferase 5 family, polypeptide B3 [Source:ZFIN;Acc:ZDB-GENE-100406-5]	-0.0445461	0.125884	0.205094	-0.0628104	-0.0146122	0.0218961	0.225436	0.129989	0.112611	0.114752	0.105917	0.0819136	0.0503979	0.101242	0.033567	0.0114078
ENSDARG00000023656	HE1A	hatching enzyme 1a [Source:ZFIN;Acc:ZDB-GENE-021211-3]	0.303007	0.0831345	-0.42247	-0.0225019	-0.192009	0.478307	-0.157583	0.0141788	0.162654	0.114738	-0.0600764	-0.0688275	0.076775	0.0450717	0.17567	-0.0876491
ENSDARG00000089993	CR788255.1	N/A	0.0515035	0.0134432	0.00983019	0.031576	0.0262738	0.0424005	0.0471407	0.053065	0.0212086	0.114652	0.025928	0.0273075	0.10927	0.0489464	0.0300244	0.0617521
ENSDARG00000102262	SI:DKEY-179K24.5	si:dkey-179k24.5 [Source:ZFIN;Acc:ZDB-GENE-110913-28]	0.0459791	0.102946	0.100395	0.0405138	0.0377177	0.0597243	0.00904353	0.098843	0.048066	0.114539	0.0731662	0.0635397	0.0891332	0.0797854	0.0430655	0.0653249
ENSDARG00000036704	TMEM18	transmembrane protein 18 [Source:ZFIN;Acc:ZDB-GENE-040927-26]	-0.00424692	0.0193267	-0.08891	-0.0409328	0.0733126	0.0659656	-0.0180966	-0.0338994	0.0193201	0.114381	-0.121122	0.0298108	-0.156866	-0.137499	0.0115673	-0.111358
ENSDARG00000102395	HAPLN1	hyaluronan and proteoglycan link protein 1 [Source:HGNC Symbol;Acc:HGNC:2380]	-0.119791	0.0283592	0.0673452	-0.045401	0.208764	0.00464517	0.156039	0.00755206	-0.0755576	0.114308	-0.0253665	-0.0413414	-0.00165191	-0.0161548	-0.0756654	0.069397
ENSDARG00000014565	EIF4E1B	eukaryotic translation initiation factor 4E family member 1B [Source:ZFIN;Acc:ZDB-GENE-980526-127]	-0.0601286	-0.00436274	-0.0598286	0.188324	-0.0934226	0.011961	-0.0368712	0.0578599	0.0902625	0.113854	-0.0685064	-0.0381805	-0.0257985	-0.00725776	-0.0614817	-0.0191979
ENSDARG00000102737	CABZ01060490.2	N/A	-0.0185704	0.032948	0.0922838	0.042733	0.113901	0.0934226	0.0939123	-0.00330295	0.061852	0.113721	0.0402182	-0.0264973	0.0617759	0.0312995	0.0738938	0.0501367
ENSDARG00000041925	CRYBA2B	crystallin, beta A2b [Source:ZFIN;Acc:ZDB-GENE-040718-324]	-0.323086	-0.158615	-0.159473	-0.155839	0.0568953	0.0348691	-0.0697976	0.0208496	-0.00387856	0.113243	-0.176325	0.02692	-0.136632	-0.109922	-0.0875532	-0.116044
ENSDARG00000086374	ISG15	ISG15 ubiquitin-like modifier [Source:ZFIN;Acc:ZDB-GENE-021211-1]	0.095919	0.0738175	0.0426065	0.0786294	0.0142115	0.630209	0.0101744	0.0397302	0.0392034	0.113237	0.0515584	0.0329292	0.0269741	0.142981	0.036827	0.0339857
ENSDARG00000100540	CABZ01114105.1	N/A	0.102717	0.188603	0.0411775	0.0729389	0.0506277	0.0116016	0.127561	0.135016	0.0306503	0.112963	0.149183	0.0642824	0.0826989	0.00984755	0.114771	0.0783636
ENSDARG00000104638	BX324155.1	N/A	0.0696425	0.0457443	0.05277	0.0257551	-0.0645731	0.0904953	0.0258071	-0.0271772	-0.0433023	0.112952	0.125276	0.16057	0.13915	0.126506	0.0804632	0.0362642
ENSDARG00000041379	SI:CH211-245J22.3	si:ch211-245j22.3 [Source:ZFIN;Acc:ZDB-GENE-050419-38]	0.113731	0.0366176	0.0573941	0.0169003	-0.0116289	0.0950519	0.0610247	0.0565882	0.125808	0.112916	0.0330237	0.0876299	0.0089243	0.0794311	0.0211037	0.0409982
ENSDARG00000105217	SI:CH211-234C11.2	si:ch211-234c11.2 [Source:ZFIN;Acc:ZDB-GENE-110914-70]	0.104991	-0.122579	0.101475	0.116383	0.147551	0.0740453	0.0567919	0.00131632	0.149236	0.112845	0.0521017	0.0675994	0.122357	0.0690103	0.0713414	0.110934
ENSDARG00000101916	SI:DKEYP-44D3.5	si:dkeyp-44d3.5 [Source:ZFIN;Acc:ZDB-GENE-120703-2]	0.0570562	0.0225682	0.10898	0.0863037	0.135905	0.0631315	0.188	0.127865	0.0248098	0.112843	0.0780427	0.0839412	0.0683465	0.0183568	0.110779	0.0103298
ENSDARG00000093052	C6	complement component 6 [Source:ZFIN;Acc:ZDB-GENE-040426-1358]	0.385227	0.056134	0.150118	5.42e-05	0.0138199	0.317218	-0.0674785	0.0162922	-0.114776	0.112811	0.277861	-0.107321	-0.0318379	-0.0423395	0.0743171	-0.0235231
ENSDARG00000045792	SI:DKEY-106N21.1	si:dkey-106n21.1 [Source:ZFIN;Acc:ZDB-GENE-131120-167]	-0.170245	-0.0478844	0.17099	0.154148	-0.0345464	0.149743	0.182023	0.0949956	-0.110063	0.112784	0.187749	-0.153831	0.148886	0.0927866	0.0848546	0.0617862
ENSDARG00000034095	SI:DKEY-59L11.10	si:dkey-59l11.10 [Source:ZFIN;Acc:ZDB-GENE-120703-17]	0.164179	0.0661092	0.0383486	0.0440854	0.0190486	0.233503	0.171959	0.156492	0.135654	0.112714	0.074168	0.154043	0.0209427	0.0950333	0.132748	0.12275
ENSDARG00000071604	SI:CH211-156P11.1	si:ch211-156p11.1 [Source:ZFIN;Acc:ZDB-GENE-070912-120]	-0.0586614	0.142329	-0.0343367	0.0439066	0.0446443	-0.0148706	0.0718507	-0.0262959	0.00784314	0.112379	0.0467104	0.0601751	0.0729146	0.0351556	0.0137781	-0.042492
ENSDARG00000058799	MYBPHA	myosin binding protein Ha [Source:ZFIN;Acc:ZDB-GENE-040426-1531]	-0.0986906	-0.0334243	-0.0384603	-0.0904661	0.140244	-0.310157	0.169186	0.0803217	-0.0816462	0.11233	0.0388155	0.136509	-0.106267	0.0707365	-0.168784	-0.0437166
ENSDARG00000105317	SI:CH1073-365P7.2	si:ch1073-365p7.2 [Source:ZFIN;Acc:ZDB-GENE-160114-38]	0.118978	0.0360497	0.0635289	0.0501455	0.139086	0.0655169	0.186261	0.0478713	-0.010569	0.112251	0.138786	0.105395	0.0217573	0.020433	0.0296336	0.0548524
ENSDARG00000101604	CABZ01032846.1	N/A	0.101589	0.0336207	-0.159595	-0.14126	-0.0668929	0.0287013	0.0064043	-0.0666528	-0.0485115	0.112234	0.00520831	-0.0611201	-0.0344551	-0.0154481	-0.0256801	0.0722644
ENSDARG00000102378	CABZ01003056.1	N/A	0.00918804	0.161458	0.0618509	-0.0292419	0.062908	0.0961372	0.160791	-0.00179302	0.0744291	0.11221	0.0780693	-0.0305705	0.261142	0.104241	0.181461	0.116366
ENSDARG00000004713	MAD2L1	MAD2 mitotic arrest deficient-like 1 (yeast) [Source:ZFIN;Acc:ZDB-GENE-030515-3]	0.209925	0.19094	0.185635	0.141447	0.0928211	0.14438	0.00725031	0.151642	0.11362	0.112173	0.0238727	0.0291652	0.162923	0.111389	0.0158637	0.1175
ENSDARG00000045898	SI:CH211-152C2.3	si:ch211-152c2.3 [Source:ZFIN;Acc:ZDB-GENE-030131-9914]	-0.202403	0.0648674	-0.063748	-0.024334	0.240677	0.202383	0.0200309	-0.0339203	0.0751779	0.112158	-0.0598816	-0.0702566	-0.238955	-0.134565	0.0433839	-0.0320376
ENSDARG00000075963	MHC1UBA	major histocompatibility complex class I UBA [Source:ZFIN;Acc:ZDB-GENE-990415-145]	0.488328	0.0132579	0.12645	0.35087	0.0322777	0.151835	-0.0447754	0.14406	0.081	0.111999	0.17332	0.164664	0.144486	0.126746	0.124666	0.112868
ENSDARG00000039752	SI:CH73-308M11.1	si:ch73-308m11.1 [Source:ZFIN;Acc:ZDB-GENE-091204-76]	0.0288354	-0.0482272	0.0483844	0.0710069	-0.0520559	-0.0108478	0.0611739	0.0690753	-0.00838919	0.111992	-0.0186575	0.0260319	-0.0349346	0.179161	0.15188	0.128514
ENSDARG00000103722	FP236812.6	Histone H2B 1/2 [Source:UniProtKB/Swiss-Prot;Acc:Q5BJA5]	0.105664	0.103856	0.0527334	0.195086	0.138193	0.128624	0.089195	0.0997827	0.166266	0.111748	0.0854428	0.126427	0.0826629	0.158604	0.150597	0.0493382
ENSDARG00000075733	ZYX	zyxin [Source:ZFIN;Acc:ZDB-GENE-070928-18]	0.144977	0.0954229	0.217094	0.243513	0.250793	-0.000975009	0.114186	0.0240846	-0.0574407	0.111725	0.317403	0.135144	0.155977	0.285074	-0.0315833	0.27298
ENSDARG00000104969	BX323793.2	N/A	0.0721712	0.0547195	0.072542	0.0888327	0.189221	0.239153	-0.0035621	0.160238	0.058511	0.111569	0.00466035	0.0359664	0.00702009	-0.0452084	0.0680382	-0.0225066
ENSDARG00000088745	MFAP4	zgc:173915 [Source:ZFIN;Acc:ZDB-GENE-071004-112]	0.366155	0.451844	0.00865778	-0.0392677	0.14345	0.0620831	0.254571	0.0626346	0.288279	0.11149	0.424827	0.104186	0.076703	-0.00418485	0.659863	0.255917
ENSDARG00000103912	SI:CH211-227E10.3	si:ch211-227e10.3 [Source:ZFIN;Acc:ZDB-GENE-050420-291]	0.380638	0.253704	0.208019	0.170863	0.161689	0.248583	0.148117	0.102144	0.181033	0.111422	0.20691	0.138727	0.285794	0.180313	0.110371	0.0709769
ENSDARG00000104770	CABZ01072815.1	N/A	0.305776	0.197848	0.10766	0.150557	0.158274	0.238033	0.223241	0.0292473	0.0948777	0.11138	-0.0236942	0.250572	0.139952	0.23206	0.0519247	0.295457
ENSDARG00000074191	ZGC:172253	zgc:172253 [Source:ZFIN;Acc:ZDB-GENE-080215-9]	0.154943	0.318774	0.00131913	-0.0703027	0.124619	0.0609428	-0.0131674	0.160836	0.152008	0.111191	0.0585991	-0.0421715	0.32438	-0.0765918	0.289575	-0.00262103
ENSDARG00000102480	BX005417.3	N/A	0.0522016	0.105758	0.102814	0.287455	0.0454641	-0.0522357	-0.16238	0.0541308	0.180827	0.111148	-0.01422	0.077893	-0.0452981	0.157033	-0.0793328	0.209781
ENSDARG00000099196	CPLX3A	complexin 3a [Source:ZFIN;Acc:ZDB-GENE-090313-349]	-0.0329875	0.259113	0.121697	0.00725821	-0.0516812	-0.0746384	0.0749063	0.227491	-0.083339	0.111064	0.0926863	-0.163751	0.0159587	-0.0932573	0.233206	-0.145139
ENSDARG00000044501	VIML	vimentin like [Source:ZFIN;Acc:ZDB-GENE-040426-1743]	-0.0170778	0.108588	0.221922	0.104364	0.333944	0.141859	0.151741	0.204868	0.087251	0.110955	0.146544	0.215759	0.250293	0.189756	0.0939989	-0.0134796
ENSDARG00000100743	SI:DKEY-190J3.4	si:dkey-190j3.4 [Source:ZFIN;Acc:ZDB-GENE-070424-218]	0.103858	-0.00727355	-0.00407248	-0.0407272	0.0141485	0.0877868	0.0916972	0.114092	-0.0496102	0.110905	0.00217309	-0.157261	0.0196123	0.0324069	0.0518499	0.136516
ENSDARG00000041607	EIF4EBP3L	eukaryotic translation initiation factor 4E binding protein 3, like [Source:ZFIN;Acc:ZDB-GENE-030826-26]	0.177464	0.192669	0.0316652	0.302259	0.0642418	0.55641	-0.0465004	0.0193216	0.395453	0.11088	0.145999	0.20255	-0.00541058	0.20835	-0.0527615	0.0385821
ENSDARG00000062221	SI:CH211-135F11.1	si:ch211-135f11.1 [Source:ZFIN;Acc:ZDB-GENE-030131-6226]	-0.317542	-0.104938	0.323998	-0.0950074	0.210279	-0.00461751	0.0999988	0.253131	-0.074359	0.110874	-0.232	0.0735525	0.132744	-0.00165289	-0.0648899	0.0274491
ENSDARG00000104912	CABZ01115696.1	N/A	0.00307443	0.0350106	0.00558932	-0.00558708	0.143722	-0.0427089	0.0316638	-0.0779557	-0.0827846	0.110851	0.023692	-0.0223114	0.208617	0.0571154	0.0027767	-0.231869
ENSDARG00000053802	CBLN5	cerebellin 5 [Source:ZFIN;Acc:ZDB-GENE-070912-577]	-0.0696929	0.223994	-0.00999441	0.030568	-0.0128635	-0.00236156	0.110331	0.0050433	0.110465	0.11064	0.174708	0.0762691	-0.0330094	-0.0623882	-0.0307806	-0.0351331
ENSDARG00000093818	CH25H	cholesterol 25-hydroxylase [Source:HGNC Symbol;Acc:HGNC:1907]	0.0581892	-0.0388774	-0.0203279	0.0704454	-0.0103412	-0.0536815	0.110663	0.0963222	0.0588229	0.110234	0.013035	0.0986299	0.0168967	-0.0227162	0.0341194	-0.0252721
ENSDARG00000045677	OPN1SW1	opsin 1 (cone pigments), short-wave-sensitive 1 [Source:ZFIN;Acc:ZDB-GENE-991109-25]	-0.168542	0.112908	0.0349887	0.0435227	-0.00995601	-0.141345	0.126642	0.0824456	-0.112434	0.110208	0.00533486	0.0251693	0.0296634	-0.00524431	0.244541	0.0234165
ENSDARG00000093990	SI:CH211-165B19.8	si:ch211-165b19.8 [Source:ZFIN;Acc:ZDB-GENE-070912-135]	0.199524	-0.0533686	0.143512	0.0370118	-0.00697361	0.0896497	-0.00546286	0.104422	0.0285575	0.110174	0.0353083	0.098185	-0.0575034	0.118183	0.00892573	0.0269161
ENSDARG00000003077	SI:CH73-111M19.2	si:ch73-111m19.2 [Source:ZFIN;Acc:ZDB-GENE-130603-13]	-0.187477	-0.184921	0.0741503	0.0629158	-0.0820762	-0.0443033	-0.0238391	-0.0717485	-0.0766612	0.110172	-0.00831507	0.0443805	0.0570735	0.00233137	-0.0147946	-0.201416
ENSDARG00000099356	SI:DKEY-6F10.5	si:dkey-6f10.5 [Source:ZFIN;Acc:ZDB-GENE-130531-32]	0.201784	0.178195	-0.0197374	0.167065	-0.020993	0.354421	0.0649537	-0.0295078	0.164031	0.11011	0.0771379	0.117178	-0.0162947	0.103886	0.28519	0.167079
ENSDARG00000011581	SI:DKEY-23K10.5	si:dkey-23k10.5 [Source:ZFIN;Acc:ZDB-GENE-030131-4787]	0.117338	0.0353719	0.124268	0.0179284	0.178688	0.322235	0.0231645	0.112108	0.544414	0.110053	0.117081	-0.0478397	0.0930697	0.134276	0.126404	0.407313
ENSDARG00000015355	FOSL1A	FOS-like antigen 1a [Source:ZFIN;Acc:ZDB-GENE-061207-7]	0.205182	0.0919275	0.0134137	-0.0176923	0.0301471	0.572838	-0.0485876	-0.0254617	-0.0171312	0.109727	0.260479	0.062418	-0.0112012	0.0825025	-0.0112674	0.0619208
ENSDARG00000093522	BX548044.5	N/A	0.0395729	0.00214114	0.0490267	0.154758	0.0996131	0.0975279	0.0316393	0.172984	0.173769	0.109393	0.0862735	0.189239	-0.0105554	-0.0165673	0.0551097	0.125889
ENSDARG00000104890	SI:CH211-76M11.3	si:ch211-76m11.3 [Source:ZFIN;Acc:ZDB-GENE-041210-276]	-0.0230292	0.385025	0.341289	0.144912	0.153399	-0.0570882	0.168798	0.256633	-0.253363	0.109092	0.249566	-0.172588	0.0882117	0.242917	0.0891504	0.017623
ENSDARG00000099123	CU459186.2	N/A	0.123141	0.164618	0.0607694	0.0307576	0.136646	0.127971	0.26149	0.109147	0.0520647	0.10864	0.0553963	0.0871648	0.0542997	0.244044	0.201795	0.118363
ENSDARG00000088245	SI:DKEY-16P6.1	si:dkey-16p6.1 [Source:ZFIN;Acc:ZDB-GENE-081103-43]	0.0622782	0.121361	0.0941121	0.190704	-0.0863021	-0.00256706	0.0318422	0.0623874	0.106901	0.108586	0.114586	0.0121201	0.233673	0.052337	0.128649	-0.0281186
ENSDARG00000090220	ZMP:0000000989	zmp:0000000989 [Source:ZFIN;Acc:ZDB-GENE-130530-992]	0.139683	0.120515	0.0308619	0.0774758	-0.0444318	0.0317512	0.130952	0.163463	0.123142	0.108549	0.1048	-0.0189575	0.109019	0.268239	0.0518429	0.0458866
ENSDARG00000103781	SI:DKEYP-4F2.1	si:dkeyp-4f2.1 [Source:ZFIN;Acc:ZDB-GENE-081103-33]	-0.0891593	0.301772	0.416508	-0.0320829	0.158519	-0.0782875	0.255888	0.184121	0.0849811	0.108517	0.414649	-0.253532	0.370531	0.19801	0.217096	0.0334103
ENSDARG00000099152	SI:CH211-271G18.1	si:ch211-271g18.1 [Source:ZFIN;Acc:ZDB-GENE-081103-38]	0.0377036	0.016341	-0.0748783	0.0675089	0.00733464	0.0361412	-0.0177125	-0.0442638	-0.00803016	0.108458	-0.0137783	0.120195	0.0287495	0.118455	0.0600137	0.0670178
ENSDARG00000100023	CABZ01019474.1	N/A	-0.0362616	0.00651178	0.048474	-0.0025922	0.0675561	-0.0158594	0.0499906	0.0689434	0.0949324	0.108365	-0.0945816	0.0364649	-0.136003	0.00974368	0.0614477	-0.0432183
ENSDARG00000108138	BX294653.2	N/A	0.0823593	0.0640211	-0.00244881	0.0127123	0.000524037	0.0489162	0.096898	0.00395073	0.0924298	0.108014	0.0168503	0.0436373	0.0481479	0.0519086	0.0145486	0.0304117
ENSDARG00000017444	HAL	histidine ammonia-lyase [Source:ZFIN;Acc:ZDB-GENE-070410-5]	-0.0270919	0.111707	0.156416	-0.0553276	0.278368	-0.150069	-0.0181827	0.127986	-0.152501	0.107931	-0.12497	0.0421161	0.00280053	0.0721644	-0.110777	0.00856509
ENSDARG00000036430	SAT2A	spermidine/spermine N1-acetyltransferase family member 2a [Source:ZFIN;Acc:ZDB-GENE-041212-21]	0.0624164	0.0529288	0.125328	0.0582882	0.164082	0.111627	0.274498	0.199601	0.0490594	0.107815	0.238203	0.0617413	0.265165	0.0947645	0.130351	0.0590075
ENSDARG00000053386	WDR27	WD repeat domain 27 [Source:ZFIN;Acc:ZDB-GENE-051120-93]	-0.0637577	-0.00352	0.0913045	-0.128225	0.105215	-0.0433239	-0.0586118	-0.0021168	-0.148266	0.107715	0.147249	-0.139958	0.0108016	-0.0261673	0.0157325	-0.0364774
ENSDARG00000104499	CABZ01080545.1	N/A	0.381264	0.329025	-0.0395795	0.115942	0.0357217	0.25675	0.111175	0.107675	0.161549	0.107553	0.288409	-0.0334868	0.0248612	-0.00470911	-0.127065	-0.0190006
ENSDARG00000098886	BX294383.1	N/A	0.213992	0.15329	0.215824	0.197953	0.259363	0.3153	0.0651456	0.154846	0.0753799	0.107507	0.162748	0.280872	0.118195	0.287813	0.175709	0.219971
ENSDARG00000103047	CABZ01008480.1	N/A	-0.152917	0.0187453	0.0148699	0.0133667	-0.0707902	0.0280158	0.0178925	-0.0248241	0.0499782	0.107489	0.062144	-0.053599	0.0109902	0.0568448	0.0203059	-0.035209
ENSDARG00000094155	CU207311.2	N/A	0.0699673	0.0468977	0.0701196	0.0128088	0.0205182	0.0496417	0.0556991	-0.0348091	-0.0304718	0.107462	0.0595469	0.0442311	0.0288087	0.0677977	0.0497683	0.10621
ENSDARG00000041811	RPS25	ribosomal protein S25 [Source:ZFIN;Acc:ZDB-GENE-040426-1788]	0.0925802	0.0535438	-0.18887	-0.0505567	0.149134	0.0780351	0.0323449	0.111403	0.153817	0.107308	-0.0827634	0.0533776	-0.0367975	-0.150202	-0.0432583	-0.0644189
ENSDARG00000058318	C1QTNF9	C1q and TNF related 9 [Source:ZFIN;Acc:ZDB-GENE-080303-33]	-0.0190684	0.112366	0.233578	0.0848744	-0.134152	0.245085	0.122239	0.00116511	0.272072	0.10729	0.0536444	0.112749	0.0714594	0.214221	0.135978	0.069889
ENSDARG00000023181	PCP4L1	Purkinje cell protein 4 like 1 [Source:ZFIN;Acc:ZDB-GENE-040724-35]	-0.532326	-0.161709	0.11144	-0.103009	0.00107186	-0.480591	0.0169762	0.0947209	-0.535524	0.10724	-0.204811	-0.0815569	-0.0471966	-0.0209981	-0.187362	-0.17799
ENSDARG00000087873	EEVS	2-epi-5-epi-valiolone synthase [Source:ZFIN;Acc:ZDB-GENE-131121-365]	-0.0847014	-0.0430962	0.113974	-0.0319693	0.10166	-0.148462	0.289762	-0.0309399	-0.00349456	0.107106	0.0574693	0.0489187	0.0716777	-0.0110545	0.121613	-0.0778279
ENSDARG00000041119	CEACAM1	carcinoembryonic antigen-related cell adhesion molecule 1 [Source:ZFIN;Acc:ZDB-GENE-010724-14]	0.178092	0.241775	0.114913	-0.0575575	0.0973268	0.269143	-0.0594809	-0.00237305	0.218573	0.107106	0.18117	0.0649062	0.0475889	0.0231384	0.0968476	-0.0484403
ENSDARG00000092813	FNDC7RS4	fibronectin type III domain containing 7, related sequence 4 [Source:ZFIN;Acc:ZDB-GENE-070912-648]	-0.0613984	0.0469897	0.132045	0.0484782	0.336993	-0.0487144	0.29199	0.177878	-0.13216	0.106752	0.0996267	0.146397	0.165872	0.00831931	-0.0260347	-0.0177896
ENSDARG00000102583	IL4R.1	interleukin 4 receptor, tandem duplicate 1 [Source:ZFIN;Acc:ZDB-GENE-050227-5]	0.100366	-0.173279	-0.00949056	0.0631838	-0.0759486	0.294585	-0.0967482	-0.199651	-0.0180345	0.106615	0.198653	-0.0165302	-0.0147021	-0.0171247	-0.0707378	0.0455337
ENSDARG00000104125	TTC6	tetratricopeptide repeat domain 6 [Source:ZFIN;Acc:ZDB-GENE-090429-2]	0.0618415	0.272838	0.161274	0.0973074	0.171392	0.0404741	-0.106474	0.0392015	-0.104394	0.106506	0.112278	0.212165	0.217622	0.117212	0.0253462	-0.0584367
ENSDARG00000103077	SI:RP71-81E14.2	si:rp71-81e14.2 [Source:ZFIN;Acc:ZDB-GENE-060503-95]	0.0249003	0.114534	0.0254792	0.0885574	0.111024	0.0613871	0.0991115	0.11244	0.0865887	0.106238	0.0935857	0.0530809	0.103493	0.078954	0.0452985	0.0461483
ENSDARG00000044754	GNRH2	gonadotropin-releasing hormone 2 [Source:ZFIN;Acc:ZDB-GENE-030516-1]	0.189946	0.10132	0.0919554	0.124294	0.0145917	0.115164	-0.0413231	0.0956585	0.127728	0.106189	0.0348402	0.0787869	-5.34e-05	0.0223083	-0.00806542	-0.00613631
ENSDARG00000074604	PHC3	polyhomeotic homolog 3 (Drosophila) [Source:ZFIN;Acc:ZDB-GENE-070912-369]	0.112382	0.0447123	0.216043	0.013073	0.105432	0.0568161	0.042247	0.0584782	0.0578392	0.10608	0.151657	-0.00691535	0.135992	0.050461	0.220659	0.0844859
ENSDARG00000092379	SI:DKEYP-51B9.3	si:dkeyp-51b9.3 [Source:ZFIN;Acc:ZDB-GENE-081104-469]	0.0227455	-0.0756543	0.143076	-0.0046258	0.331502	-0.0950295	0.0893019	0.0520211	-0.0840508	0.106059	-0.120552	-0.0660565	-0.0671207	-0.0696972	0.0634077	0.0746161
ENSDARG00000094712	BX294165.2	N/A	0.163257	-0.0191183	-0.0991903	0.0710649	0.135235	0.259978	0.115262	0.214999	0.191666	0.105875	0.244373	0.110229	0.076374	0.0651749	0.148656	0.0429727
ENSDARG00000033355	ZGC:101699	zgc:101699 [Source:ZFIN;Acc:ZDB-GENE-041114-140]	0.095083	0.041615	0.0644417	0.18366	-0.00360713	0.0585768	0.227079	0.236778	0.171701	0.105847	0.171556	0.282165	0.143826	0.177253	0.0821765	0.183362
ENSDARG00000107483	BX942815.1	N/A	0.019301	0.178728	0.031203	-0.0109671	-0.212857	-0.235091	-0.00626167	0.00429476	-0.0138433	0.10581	-0.041357	0.111599	0.191087	0.0850374	0.122397	-0.0941414
ENSDARG00000099153	SI:DKEY-48G21.6	si:dkey-48g21.6 [Source:ZFIN;Acc:ZDB-GENE-141212-309]	-0.0214557	0.0259866	0.114793	-0.115763	-0.0137807	-0.122404	0.0838276	0.06927	0.0625875	0.105392	-0.109877	-0.0853624	-0.0165957	0.0328196	0.251876	-0.16707
ENSDARG00000068812	TLR7	toll-like receptor 7 [Source:ZFIN;Acc:ZDB-GENE-040219-11]	-0.0240713	0.0492796	-0.0450742	0.072144	0.159618	-0.00869207	0.0453723	0.151341	-0.0569702	0.105179	-0.0573184	-0.00665974	0.0975746	-0.0526286	-0.0820888	-0.0524587
ENSDARG00000090462	MRPL20	mitochondrial ribosomal protein L20 [Source:ZFIN;Acc:ZDB-GENE-030131-5299]	-0.0547622	0.145254	0.442184	0.248611	0.244104	0.0677149	0.30358	0.20158	-0.0667726	0.105138	0.052598	0.0437814	0.153821	0.0535015	0.0121885	0.214922
ENSDARG00000105508	SI:DKEY-23A13.21	si:dkey-23a13.21 [Source:ZFIN;Acc:ZDB-GENE-160113-53]	0.104676	0.067514	0.0450836	0.0232373	0.157171	0.0735529	0.139041	0.159365	0.108568	0.105054	0.0414295	0.042124	0.105767	0.0291335	0.0569744	0.115766
ENSDARG00000095326	SI:DKEY-88N24.3	si:dkey-88n24.3 [Source:ZFIN;Acc:ZDB-GENE-041014-89]	0.0857238	0.0921893	0.0115944	0.033512	0.0235345	0.0782762	0.13669	-0.0158543	0.012856	0.105029	0.061307	0.0875816	0.0828344	-0.0280806	0.0621626	0.0541901
ENSDARG00000097134	SI:DKEY-7I4.7	si:dkey-7i4.7 [Source:ZFIN;Acc:ZDB-GENE-131119-71]	0.0158343	0.0288116	-0.0597453	0.0188113	0.0409409	-0.109129	-0.0575603	-0.0151299	0.0236127	0.105019	0.045372	0.00391843	0.00812203	-0.037182	-0.0691917	0.0507956
ENSDARG00000103987	CIB1	calcium and integrin binding 1 [Source:HGNC Symbol;Acc:HGNC:16920]	0.214668	0.0282885	-0.0167636	-0.0313817	0.0408773	0.0797628	-0.123079	-0.0244362	0.0190399	0.104722	0.0134849	0.0251803	0.242401	-0.0168266	0.0829677	0.098199
ENSDARG00000095695	MS4A17A.10	membrane-spanning 4-domains, subfamily A, member 17A.10 [Source:ZFIN;Acc:ZDB-GENE-080829-3]	0.277444	-0.0978823	0.0190584	-0.0593376	-0.114678	0.280613	0.0463645	0.11348	-0.0304527	0.104711	0.0157493	0.0805925	-0.0854538	-0.0457292	0.0821855	-0.0657943
ENSDARG00000069917	SKA3	spindle and kinetochore associated complex subunit 3 [Source:ZFIN;Acc:ZDB-GENE-030131-2997]	0.489716	-0.0540202	-0.0970149	0.022643	0.000988876	0.153688	-0.136927	0.0138526	0.300652	0.104565	0.0963204	-0.068817	-0.09505	0.00619768	0.0216518	0.072635
ENSDARG00000098369	SI:DKEY-165O8.1	si:dkey-165o8.1 [Source:ZFIN;Acc:ZDB-GENE-131118-7]	-0.0171471	0.0908143	0.176993	0.0853451	0.135751	0.021103	0.0381122	0.107773	0.134867	0.10396	0.0201267	0.077173	0.0396014	0.0775265	0.116591	0.0809257
ENSDARG00000022525	MCHR1B	melanin-concentrating hormone receptor 1b [Source:ZFIN;Acc:ZDB-GENE-030502-5]	0.186768	0.055156	0.0113512	0.148422	0.199975	0.246397	0.0409441	0.116255	0.123188	0.103882	0.109203	0.0632409	0.145764	0.200015	0.168474	0.257834
ENSDARG00000045685	CNTN1B	contactin 1b [Source:ZFIN;Acc:ZDB-GENE-041210-236]	-0.382461	0.0216069	0.174526	-0.101002	0.23782	-0.339904	0.187951	0.143789	-0.430033	0.103417	0.0448036	-0.0804499	0.0232862	0.0535445	0.00202924	-0.0214309
ENSDARG00000004171	RABAC1	Rab acceptor 1 (prenylated) [Source:ZFIN;Acc:ZDB-GENE-040625-146]	0.123145	0.189857	0.139847	0.0405778	0.126371	0.101299	-0.112022	0.0847024	0.238355	0.103366	-0.0410453	0.176295	-0.0567175	0.0355262	-0.0182643	-0.0815776
ENSDARG00000070061	GFER	growth factor, augmenter of liver regeneration (ERV1 homolog, S. cerevisiae) [Source:ZFIN;Acc:ZDB-GENE-060810-186]	0.0579378	-0.0566357	0.052315	0.179206	0.143412	0.10795	0.0369454	0.0378874	-0.00272423	0.103306	0.135232	0.170424	0.127265	0.174423	-0.0466667	0.0181094
ENSDARG00000095082	SI:CH211-194P6.12	si:ch211-194p6.12 [Source:ZFIN;Acc:ZDB-GENE-160728-9]	-0.12859	0.025546	-0.0251266	-0.053163	-0.126049	-0.0673428	0.0288096	-0.0138308	-0.069024	0.103276	0.0584276	-0.0334463	-0.0239433	-0.0677275	-0.152765	0.151008
ENSDARG00000034063	UNM_SA911	un-named sa911 [Source:ZFIN;Acc:ZDB-GENE-120727-3]	0.528748	0.143877	-0.000559467	0.0460055	0.0566737	0.160813	0.0931981	0.118004	0.171925	0.103242	0.127964	-0.0158499	0.118328	0.14593	0.216791	0.214612
ENSDARG00000102455	ZNF1133	zinc finger protein 1133 [Source:ZFIN;Acc:ZDB-GENE-110913-178]	0.0361852	0.0647183	0.0501692	0.0632593	0.0591156	0.0330429	0.131735	0.117761	0.110572	0.103155	-0.014642	0.0440848	0.0377394	0.0133025	0.076065	0.0161286
ENSDARG00000095777	SI:CH211-218H8.3	si:ch211-218h8.3 [Source:ZFIN;Acc:ZDB-GENE-120703-51]	0.368935	0.227601	0.0391001	0.0426102	0.0130582	-0.112859	0.165151	0.153951	-0.0334691	0.103114	0.352602	0.0174194	0.207501	0.0704264	-0.0299163	0.215289
ENSDARG00000092000	ZNF1020	zinc finger protein 1020 [Source:ZFIN;Acc:ZDB-GENE-110913-31]	0.202783	0.143838	-0.123908	-0.0362707	-0.0996176	-0.021128	0.181001	-0.0599711	0.104059	0.103072	-0.0854831	0.0352679	-0.0720801	-0.115373	0.113082	-0.0847063
ENSDARG00000089304	SI:DKEYP-4F2.1	si:dkeyp-4f2.1 [Source:ZFIN;Acc:ZDB-GENE-081103-33]	0.0576248	0.249969	0.287115	0.154865	0.117044	-0.0172115	0.0994522	-0.0462502	0.128536	0.102894	0.185125	0.0628002	0.415717	0.19753	0.0735473	-0.0926539
ENSDARG00000093570	SI:DKEY-25O1.7	si:dkey-25o1.7 [Source:ZFIN;Acc:ZDB-GENE-091204-375]	0.0185371	0.203829	0.095505	0.0945001	0.0895845	0.186636	-0.00320543	0.0596134	0.00824312	0.102402	-0.0282335	0.0277427	0.013968	-0.0116795	0.0496126	0.0443499
ENSDARG00000042962	DGCR2	DiGeorge syndrome critical region gene 2 [Source:ZFIN;Acc:ZDB-GENE-040718-404]	0.0499344	-0.0286642	-0.034423	-0.0590323	-0.0405082	-0.0443042	-0.0294091	0.130423	0.0586126	0.102074	0.114015	0.0658595	-0.109074	-0.240666	0.0213964	0.122293
ENSDARG00000062487	SI:DKEY-6N6.1	si:dkey-6n6.1 [Source:ZFIN;Acc:ZDB-GENE-060503-80]	-0.245554	-0.033702	0.122944	-0.206184	0.331698	-0.223611	0.135114	0.189215	-0.247945	0.101754	0.0677656	0.00348601	0.234535	0.142987	-0.0615228	0.157897
ENSDARG00000099494	SI:DKEYP-77C4.5	si:dkeyp-77c4.5 [Source:ZFIN;Acc:ZDB-GENE-131119-35]	0.14748	0.194794	0.00354367	0.193746	-0.0679504	-0.00975064	0.140715	0.100044	-0.0552103	0.101708	0.056264	0.227619	0.109683	0.11648	0.26978	0.00609707
ENSDARG00000069363	ZGC:153142	zgc:153142 [Source:ZFIN;Acc:ZDB-GENE-061013-507]	0.135748	-0.0433125	0.134719	-0.117735	-0.0763804	-0.0129414	0.0848337	0.10876	0.0459507	0.101689	-0.105276	0.101168	-0.016702	0.0562429	0.00778732	-0.0527333
ENSDARG00000090570	NAA40	N(alpha)-acetyltransferase 40, NatD catalytic subunit, homolog (S. cerevisiae) [Source:ZFIN;Acc:ZDB-GENE-050417-105]	0.413447	0.0109164	0.0857082	0.298281	-0.0516636	-0.0347844	-0.0312295	0.205364	0.0822863	0.101621	-0.104607	0.0822238	-0.107079	0.12883	0.116881	0.157814
ENSDARG00000105218	OMPA	olfactory marker protein a [Source:ZFIN;Acc:ZDB-GENE-050626-118]	0.0321024	0.0634506	0.00685201	0.0330275	-0.046808	-0.00744779	0.0409386	-0.0298012	-0.04627	0.101589	0.0389886	0.035686	-0.0268084	0.0540364	-0.0483852	-0.0396059
ENSDARG00000092600	SI:DKEY-256E7.5	si:dkey-256e7.5 [Source:ZFIN;Acc:ZDB-GENE-090313-282]	-0.033408	0.0478201	0.0641191	-0.0409121	0.164225	0.0253584	-0.00742003	0.0335427	-0.0028096	0.101272	0.159253	-0.152144	0.0550368	-0.0023195	0.0089134	-0.02374
ENSDARG00000018334	RPL35	ribosomal protein L35 [Source:ZFIN;Acc:ZDB-GENE-020419-2]	0.087838	0.0524607	-0.200798	-0.152657	0.0418104	0.149578	-0.00288181	0.0757677	0.25637	0.101237	-0.180588	0.0340173	-0.19026	-0.222673	0.0646244	-0.159021
ENSDARG00000090015	BX321875.1	N/A	0.0278945	0.141552	0.166175	-0.0337865	0.0835757	-0.0238501	0.109097	0.136655	0.150613	0.101139	0.129488	0.0202806	0.211177	0.0279553	0.00202032	0.0459058
ENSDARG00000013997	ERN1	endoplasmic reticulum to nucleus signaling 1 [Source:ZFIN;Acc:ZDB-GENE-050522-431]	0.0106354	0.0248031	0.0110129	0.208558	0.194198	0.110561	-0.0271382	0.145845	0.177847	0.101129	0.129814	0.0681985	0.0920441	0.266498	0.000726901	-0.0795889
ENSDARG00000090033	SI:DKEY-16P6.1	si:dkey-16p6.1 [Source:ZFIN;Acc:ZDB-GENE-081103-43]	0.0663547	0.0643338	0.0121129	-0.0290119	0.120531	0.114338	-0.00850628	-0.0759257	-0.0567857	0.101095	-0.025613	0.023085	-0.0342359	0.0686157	0.0892056	0.00450252
ENSDARG00000098877	BX510909.1	N/A	0.116921	0.0609321	0.0230759	0.0211587	0.0516297	0.0745594	0.0524496	0.0325035	0.0283679	0.100886	0.0494258	0.0406025	0.0540864	0.104853	0.0789012	0.11424
ENSDARG00000096990	SI:CH1073-340I21.2	si:ch1073-340i21.2 [Source:ZFIN;Acc:ZDB-GENE-131121-430]	0.537818	0.267487	-0.0857472	-0.0087815	-0.302051	0.357682	-0.196246	-0.32122	0.28311	0.100232	0.157218	-0.134231	-0.0802127	0.141759	-0.0748706	0.117172
ENSDARG00000036376	CLDN7A	claudin 7a [Source:ZFIN;Acc:ZDB-GENE-040718-29]	-0.047072	-0.219136	0.0881067	-0.11347	0.153746	-0.23117	0.311859	0.128961	-0.311917	0.0999969	0.0889644	0.0810545	0.16223	0.0488379	-0.0188197	0.00743339
ENSDARG00000060846	CABP7B	calcium binding protein 7b [Source:ZFIN;Acc:ZDB-GENE-060526-366]	-0.24723	-0.0468568	-0.00530202	0.0182994	0.133918	-0.182646	-0.214084	0.00144324	-0.288949	0.0999106	-0.035864	-0.0280774	-0.0084514	-0.0483658	-0.205961	-0.0447737
ENSDARG00000103810	CACNA2D4A	calcium channel, voltage-dependent, alpha 2/delta subunit 4a [Source:ZFIN;Acc:ZDB-GENE-041210-213]	-0.121946	0.134312	0.0150272	0.0788047	0.0448876	-0.238784	0.139516	-0.0429629	-0.140679	0.0998799	-0.0507807	0.0259952	-0.0568215	-0.0451906	-0.0865584	0.18251
ENSDARG00000058839	SUSD1	sushi domain containing 1 [Source:ZFIN;Acc:ZDB-GENE-060526-169]	0.0770089	0.0118776	0.0773594	0.0279309	0.0138016	-0.112361	-0.0325898	-0.101754	0.0494638	0.099633	0.0545306	0.0922539	-0.0430172	0.0990566	-0.128102	0.0872741
ENSDARG00000078190	PCDH2G13	protocadherin 2 gamma 13 [Source:ZFIN;Acc:ZDB-GENE-050610-3]	-0.0074031	0.0157545	0.223476	0.182428	0.0865233	-0.113735	0.119029	0.158731	-0.225965	0.0995795	0.124931	0.0839075	0.264838	0.262185	-0.0215828	0.108254
ENSDARG00000012035	ZGC:100832	zgc:100832 [Source:ZFIN;Acc:ZDB-GENE-040801-53]	0.0847451	0.0823914	0.123954	0.202875	0.249525	0.0524017	0.0806066	0.0758204	0.0695836	0.09955	0.220032	0.0456517	0.101684	0.0917371	0.0411712	0.172826
ENSDARG00000095893	SI:DKEY-85N7.7	si:dkey-85n7.7 [Source:ZFIN;Acc:ZDB-GENE-110408-52]	0.478174	0.0446887	-0.0792604	0.288542	0.0367465	0.283311	0.181029	0.151831	0.219209	0.0995423	0.0213129	0.147621	0.248122	0.510632	0.0670228	0.117059
ENSDARG00000025728	GRIN1B	glutamate receptor, ionotropic, N-methyl D-aspartate 1b [Source:ZFIN;Acc:ZDB-GENE-051202-2]	-0.400252	-0.136189	0.106805	-0.082781	0.118647	-0.359375	0.122516	0.0684242	-0.574092	0.0993951	0.0806924	-0.0550771	0.0533286	-0.0974939	-0.128737	0.121884
ENSDARG00000102536	ZGC:174646	zgc:174646 [Source:ZFIN;Acc:ZDB-GENE-080305-6]	-0.111255	0.0534781	-0.0188026	-0.0343491	-0.018802	-0.0126038	-0.0691646	0.0860798	-0.016712	0.0993729	0.102579	-0.101364	0.0411309	-0.0419325	-0.00106273	-0.0346566
ENSDARG00000001953	PFKFB3	6-phosphofructo-2-kinase/fructose-2,6-biphosphatase 3 [Source:ZFIN;Acc:ZDB-GENE-040426-2724]	-0.126145	0.143783	0.135332	0.0786783	0.148225	0.399664	0.218113	0.241049	-0.174152	0.0993028	-0.115939	0.0537965	0.168473	-0.0200017	-0.109497	0.0516525
ENSDARG00000102655	CABZ01050398.1	N/A	0.0606425	-0.0156169	-0.0300309	0.0701284	0.0415562	-0.00822337	-0.031121	-0.00291683	0.012077	0.0993024	0.0301538	0.00813274	0.0217558	0.134257	0.0118257	0.0317506
ENSDARG00000098305	SI:CH211-76M11.8	si:ch211-76m11.8 [Source:ZFIN;Acc:ZDB-GENE-041210-280]	0.185401	0.0172744	-0.170716	-0.0130034	0.161472	0.0523874	0.0544095	0.0402014	-0.0326244	0.0992592	-0.0931696	0.0293043	-0.0184954	0.0306334	0.0782261	-0.137458
ENSDARG00000040781	SULT3ST4	sulfotransferase family 3, cytosolic sulfotransferase 4 [Source:ZFIN;Acc:ZDB-GENE-050913-17]	-0.107903	0.389642	0.0698249	-0.0848735	0.256973	-0.14803	0.0420218	0.194424	0.12882	0.0992147	-0.0213996	0.079009	0.114977	0.138634	-0.0872076	0.191605
ENSDARG00000039005	TRAPPC1	trafficking protein particle complex 1 [Source:ZFIN;Acc:ZDB-GENE-040718-242]	-0.00938339	-0.0406336	-0.0858836	-0.105196	-0.183147	0.0313521	-0.0716266	0.00200795	0.141939	0.0992134	-0.167065	0.00923339	-0.214234	-0.0937471	0.0421764	-0.166408
ENSDARG00000098122	ZNF189	zinc finger protein 189 [Source:HGNC Symbol;Acc:HGNC:12980]	0.218147	0.181995	0.0751683	-0.00118458	0.0225306	-0.104688	0.14779	-0.128287	0.173214	0.0992075	-0.206143	0.200296	-0.0368028	-0.00896358	0.071941	0.0983493
ENSDARG00000053293	FTR14	finTRIM family, member 14 [Source:ZFIN;Acc:ZDB-GENE-060512-201]	-0.0150319	-0.0635643	0.133261	0.0894314	0.0324547	-0.0280798	0.000622002	0.125948	0.0956478	0.0991323	-0.227234	0.143215	-0.130529	0.0205286	0.0129974	-0.158435
ENSDARG00000101594	SI:DKEY-246J6.1	si:dkey-246j6.1 [Source:ZFIN;Acc:ZDB-GENE-110913-97]	0.171272	0.161372	-0.0123483	0.00934514	-0.10866	-0.0923598	-0.0150814	0.0743329	0.116715	0.0991049	0.049001	0.0796573	0.0580911	-0.00103706	0.189813	-0.0132425
ENSDARG00000103966	SI:CH211-156B7.5	si:ch211-156b7.5 [Source:ZFIN;Acc:ZDB-GENE-141212-398]	0.0199723	0.00997854	0.0318154	-0.0226631	-0.0257718	0.0587942	0.0061095	0.0646042	0.0173615	0.0990607	0.0745292	0.0914564	0.013465	0.0496725	0.0647827	-0.0246585
ENSDARG00000076787	ANGPT4	angiopoietin 4 [Source:ZFIN;Acc:ZDB-GENE-110104-1]	0.0411363	0.688205	0.417282	0.131566	0.322151	0.273277	0.175887	0.0464733	0.313173	0.0990417	0.204076	-0.0114867	0.024261	-0.0866921	0.186826	0.0950857
ENSDARG00000101812	ZGC:114120	zgc:114120 [Source:ZFIN;Acc:ZDB-GENE-050913-55]	0.0185354	-0.0105976	-0.0340513	0.006118	0.00237938	-0.0205764	-0.00982648	-0.0723489	-0.0344908	0.0989381	-0.0841605	0.121816	0.0324761	-0.0219634	0.0282985	0.0576841
ENSDARG00000067859	SCOSPONDIN	subcommissural organ spondin [Source:ZFIN;Acc:ZDB-GENE-051114-1]	0.266626	0.0946363	-0.206566	-0.048986	-0.0473034	0.159783	-0.018571	-0.154008	0.131897	0.0986835	0.35717	-0.0230566	0.168483	0.00716827	-0.0295992	-0.015477
ENSDARG00000102572	SI:CH211-260E23.9	si:ch211-260e23.9 [Source:ZFIN;Acc:ZDB-GENE-141222-48]	-0.247131	-0.0743829	-0.0178259	0.0236719	0.120525	-0.244621	0.0181899	-0.0582066	-0.217929	0.0984965	0.0047246	0.0423485	-0.0280046	0.00110326	-0.248878	0.0119956
ENSDARG00000096037	SI:CH211-214J24.14	si:ch211-214j24.14 [Source:ZFIN;Acc:ZDB-GENE-110914-226]	0.134178	-0.165571	0.0168373	0.195484	0.221549	0.49941	0.222705	-0.0256582	0.0491808	0.0983601	0.127197	0.132564	0.100037	0.276516	0.144568	0.0176088
ENSDARG00000102866	CR391991.1	N/A	0.0395718	-0.00734563	0.0779542	0.0991148	0.029611	-0.0192229	0.0841972	0.0448013	0.098111	0.0983458	0.0913269	-0.0234521	0.0104496	0.0210325	0.055698	0.0234248
ENSDARG00000106002	CABZ01063789.1	N/A	0.115071	0.168644	0.172662	0.151091	0.0246256	0.0202283	0.173306	0.0582202	0.101891	0.0983221	0.0151337	0.0313825	0.130384	0.220982	0.00608248	0.0310652
ENSDARG00000077666	EVI5A	ecotropic viral integration site 5a [Source:ZFIN;Acc:ZDB-GENE-110218-2]	-0.00193284	0.00485587	0.141444	0.000175157	0.00721367	0.104516	0.0674758	0.0552516	-0.0383568	0.0980306	-0.0322556	-0.0530965	0.0376103	-0.00244942	0.027855	0.0320272
ENSDARG00000004898	ZP2L2	zona pellucida glycoprotein 2, like 2 [Source:ZFIN;Acc:ZDB-GENE-060818-4]	-0.0523146	0.035541	-0.000126425	-0.0213432	0.113768	0.0252032	-0.0792718	0.043014	-0.0506642	0.0977252	0.0339926	-0.127554	-0.00845586	0.00706279	0.0776983	0.0668231
ENSDARG00000094833	COA5	cytochrome C oxidase assembly factor 5 [Source:ZFIN;Acc:ZDB-GENE-060825-53]	0.191493	0.117973	0.0331981	0.137872	0.133555	0.204527	0.0356313	-0.0278398	0.110857	0.0976978	0.0692647	-0.00788396	0.0219004	0.0276211	0.0109484	0.134993
ENSDARG00000092246	SI:DKEY-20I20.3	si:dkey-20i20.3 [Source:ZFIN;Acc:ZDB-GENE-060503-623]	0.363205	0.125306	-0.015987	0.255434	-0.0858687	0.157819	-0.0153094	0.0883707	0.0386706	0.0976954	0.103386	0.0170453	0.224034	0.351954	0.0301418	0.0819458
ENSDARG00000075265	PLAUA	plasminogen activator, urokinase a [Source:ZFIN;Acc:ZDB-GENE-090313-278]	0.164343	-0.00191897	0.0130286	0.0135538	0.150434	0.233301	0.0576838	-0.0100186	0.0390172	0.0973532	0.246753	-0.0138303	0.0600235	0.0456254	-0.0756917	0.0476379
ENSDARG00000098398	CABZ01079480.1	N/A	0.18912	0.110882	-0.0887935	0.0221572	-0.013451	0.116242	0.0305114	0.00604021	0.0403047	0.0972985	-0.0434561	0.0184118	-0.0270493	-0.0546008	0.0392557	0.0130952
ENSDARG00000101593	ZGC:163077	zgc:163077 [Source:ZFIN;Acc:ZDB-GENE-070521-6]	-0.0636625	-0.0224124	-0.0471628	-0.0228142	-0.157405	-0.0267071	0.00934054	-0.0746196	0.0906465	0.0970557	-0.101888	-0.103978	-0.0513511	-0.0233577	0.0188302	0.043814
ENSDARG00000098392	SI:CH73-28H20.1	si:ch73-28h20.1 [Source:ZFIN;Acc:ZDB-GENE-141216-463]	-0.611785	-0.196868	0.127091	-0.144382	-0.0329958	-0.543916	0.107082	0.231147	-0.549195	0.0968543	-0.138211	-0.00719163	-0.0673561	-0.0746967	0.00309544	-0.0192236
ENSDARG00000025903	LGALS9L1	lectin, galactoside-binding, soluble, 9 (galectin 9)-like 1 [Source:ZFIN;Acc:ZDB-GENE-030131-9543]	0.077878	-0.172045	0.15017	-0.0722036	0.032233	0.0602698	-0.00721079	-0.0635183	-0.305725	0.0967718	-0.142322	0.0609598	-0.00402939	0.062871	-0.238904	0.126041
ENSDARG00000058414	BGLAP	bone gamma-carboxyglutamate (gla) protein [Source:ZFIN;Acc:ZDB-GENE-050113-4]	0.149107	0.041873	0.195841	0.099578	0.108596	0.176585	0.133719	0.16071	0.077594	0.0966122	0.158036	0.0248084	0.103529	0.0465622	0.0539797	0.0952338
ENSDARG00000097691	KIAA0101	KIAA0101 [Source:ZFIN;Acc:ZDB-GENE-131127-543]	0.352771	0.0673845	-0.230665	-0.00374317	-0.039861	0.419838	0.00206785	-0.0187609	0.374716	0.0962858	0.00921198	0.117919	-0.0888505	-0.0637369	0.119378	-0.0200929
ENSDARG00000095783	SI:DKEY-249D8.1	si:dkey-249d8.1 [Source:ZFIN;Acc:ZDB-GENE-110411-157]	-0.139006	-0.0417094	0.089865	-0.054264	0.0142144	-0.107167	-0.0617555	0.172754	-0.00399536	0.0962767	-0.141742	-0.0628093	0.0463044	-0.107646	0.0559734	-0.179301
ENSDARG00000103309	BX664625.4	N/A	-0.097397	0.0990171	-0.0869952	-0.0403868	-0.0122224	-0.060105	-0.184606	-0.0763698	0.145916	0.0961389	0.12731	0.183968	-0.0464181	0.0862104	-0.0944272	-0.133168
ENSDARG00000006413	RPL38	ribosomal protein L38 [Source:ZFIN;Acc:ZDB-GENE-030131-8752]	0.104779	0.0967593	-0.201709	-0.103386	0.0471433	0.107214	-0.0674366	0.102754	0.312781	0.0960531	-0.134642	0.0805692	-0.119288	-0.117279	0.0956484	-0.139272
ENSDARG00000021336	PAX4	paired box 4 [Source:ZFIN;Acc:ZDB-GENE-041210-244]	0.0669786	0.0656004	0.0755243	0.0700274	0.0660114	0.0551348	0.0493076	0.188838	0.0792737	0.0958639	0.0890123	0.0944373	0.0817125	0.0539618	0.0504663	0.0945738
ENSDARG00000086449	ZNF1055	zinc finger protein 1055 [Source:ZFIN;Acc:ZDB-GENE-110913-80]	0.143795	0.0873859	0.042801	0.0693455	0.0643541	0.0896567	0.0725583	0.101859	0.0382538	0.0957919	0.0894658	0.0450264	0.0719915	0.0738557	0.0469397	-0.00769132
ENSDARG00000102329	OR106-11	odorant receptor, family G, subfamily 106, member 11 [Source:ZFIN;Acc:ZDB-GENE-070806-63]	-0.110989	-0.0709904	0.14466	-0.0256458	-0.00614454	-0.0111853	-0.0259389	0.0649462	-0.0549208	0.095723	0.0190706	-0.00800187	0.0250807	-0.0260176	0.0269171	0.0124568
ENSDARG00000019747	HSD3B2	hydroxy-delta-5-steroid dehydrogenase, 3 beta- and steroid delta-isomerase 2 [Source:ZFIN;Acc:ZDB-GENE-030828-2]	-0.0387453	-0.1666	-0.00475364	0.0257637	-0.132638	0.0428653	-0.102788	-0.0619434	-0.138337	0.0956849	-0.00261985	0.0242349	0.0744513	-0.00882785	-0.0088488	-0.0954993
ENSDARG00000105106	CR749167.2	N/A	-0.0253753	0.139642	0.188748	0.136809	0.047022	0.281667	0.198045	0.265005	0.274499	0.0956496	0.122423	0.292434	0.154934	0.055268	0.197415	0.108701
ENSDARG00000100979	CABZ01075618.1	N/A	0.0619715	0.0121241	0.0501507	-0.0362708	0.0893393	0.0434792	-0.00386845	-0.0162708	0.0315734	0.0955995	0.140528	0.00312339	0.0861906	-0.0223062	-0.0738798	0.0526713
ENSDARG00000091457	CABZ01072538.1	N/A	-0.0799141	0.0317122	-0.0679046	0.00391081	-0.0248788	0.0295416	0.0750534	0.130459	-0.031021	0.0953622	-0.0535868	0.024483	-0.0142225	-0.0816061	-0.0240559	-0.00219729
ENSDARG00000074652	SMTNA	smoothelin a [Source:ZFIN;Acc:ZDB-GENE-091204-245]	-0.313036	0.108456	0.0535665	-0.061617	0.122023	-0.252323	0.100671	0.137017	-0.106858	0.0953555	0.239259	0.0308343	0.179418	-0.0300233	-0.0486959	-0.0932349
ENSDARG00000039164	MHC1UMA	major histocompatibility complex class I UMA [Source:ZFIN;Acc:ZDB-GENE-140820-1]	0.062174	0.151618	0.156667	0.0914985	0.0791439	0.136116	0.156907	0.202249	0.16574	0.0953524	0.146648	0.162796	0.108065	0.0913999	0.102791	0.0551297
ENSDARG00000035860	RPS28	ribosomal protein S28 [Source:ZFIN;Acc:ZDB-GENE-030131-2022]	0.102003	0.0737525	-0.191611	-0.0516925	0.0500445	0.194253	-0.00150533	0.0567251	0.285365	0.0953031	-0.129135	0.0781051	-0.161429	-0.147826	-0.0297893	-0.0595977
ENSDARG00000060120	GLYCTK	glycerate kinase [Source:ZFIN;Acc:ZDB-GENE-061013-308]	-0.346017	-0.0515412	-0.124602	-0.0667403	0.118449	-0.0577987	-0.0387519	-0.0788379	-0.355159	0.095123	-0.144198	-0.143137	-0.0345663	-0.00843241	-0.184744	-0.138166
ENSDARG00000096278	NKD3	naked cuticle homolog 3 [Source:ZFIN;Acc:ZDB-GENE-060503-63]	0.0764703	0.0629413	0.0761687	0.0647076	0.0718741	0.0367574	0.0308617	0.0731292	0.0382614	0.0951155	0.0269899	0.02228	0.0502761	0.0434035	0.175555	0.040545
ENSDARG00000101994	FO834888.2	N/A	0.0612879	-0.0335568	-0.17139	0.0171046	0.130472	-0.0574309	-0.151359	0.0508409	0.0193404	0.09489	0.00487164	0.00748385	-0.0642037	0.139998	-0.0632059	-0.0223991
ENSDARG00000080016	SI:CABZ01032454.3	si:cabz01032454.3 [Source:ZFIN;Acc:ZDB-GENE-161017-73]	0.170057	0.392523	0.191049	0.0777632	0.281285	-0.0180481	0.0375908	0.0497347	0.221768	0.0947771	0.151174	-0.0165429	0.230013	-0.0779506	0.239782	-0.0391818
ENSDARG00000104037	SI:DKEY-74K8.4	si:dkey-74k8.4 [Source:ZFIN;Acc:ZDB-GENE-141219-40]	0.326553	0.0194288	0.0630043	0.194145	-0.115154	0.42027	-0.0579622	-0.0458743	0.0896121	0.0946294	0.0136389	0.0441353	0.055287	0.180082	-0.00129785	0.128495
ENSDARG00000077580	TSPEARA	thrombospondin-type laminin G domain and EAR repeats a [Source:ZFIN;Acc:ZDB-GENE-120215-12]	0.0537219	0.107437	0.58094	0.0832595	0.437195	0.0995435	0.284203	0.031306	-0.0222493	0.0946179	0.0174764	-0.0172542	-0.0924523	-0.0491708	-0.0612698	-0.0527212
ENSDARG00000104340	RSPO1	R-spondin 1 [Source:ZFIN;Acc:ZDB-GENE-040718-44]	0.233714	-0.030191	0.0341904	0.0599152	0.0153896	0.147806	0.0895653	0.0533922	0.0488797	0.0945661	0.19463	0.0664562	0.213118	0.268509	0.0325021	0.0534282
ENSDARG00000099907	CABZ01088982.1	N/A	-0.12368	-0.509241	0.0260627	-0.164288	-0.115144	-0.0710729	-0.246608	0.0417262	-0.174499	0.0945356	-0.4197	0.093308	-0.0115511	0.103219	-0.067366	-0.0867779
ENSDARG00000077571	ZGC:174862	zgc:174862 [Source:ZFIN;Acc:ZDB-GENE-080303-29]	0.0299318	0.119008	0.0702692	0.0155044	-0.0261548	0.00539541	0.00849699	0.0790285	0.00258172	0.0943028	0.140662	0.0715471	0.0556021	0.0742833	0.0969085	-0.0353615
ENSDARG00000099788	CABZ01085971.1	N/A	0.0860955	0.0280322	-0.00302666	-0.00854747	0.0836032	-0.0315164	0.0539971	0.20649	-0.0250843	0.0937456	0.150656	-0.0283317	0.224973	0.293404	0.0809855	0.0471024
ENSDARG00000104569	CABZ01088484.1	N/A	0.00835113	0.018841	-0.00263811	0.0559224	0.0903215	-0.00856249	0.0826687	0.0279935	-0.0302356	0.093711	0.159902	-0.0429223	0.0341616	-0.0048185	-0.0291571	0.00496336
ENSDARG00000103992	SI:DKEY-146M20.14	si:dkey-146m20.14 [Source:ZFIN;Acc:ZDB-GENE-120703-9]	0.200718	0.0763629	0.0608775	0.0576234	0.0752283	0.0636269	0.0241784	0.0405628	-0.000555077	0.093534	0.181989	0.0762271	0.0146554	0.0317649	0.0870276	0.0843946
ENSDARG00000104328	SI:CH211-276I6.1	si:ch211-276i6.1 [Source:ZFIN;Acc:ZDB-GENE-081103-1]	0.109807	0.0884887	0.0104147	0.102321	0.0100941	0.0300552	0.0800819	0.129366	0.0599852	0.0934862	-0.0231101	0.0424409	0.156331	0.0117631	0.0763696	0.0656942
ENSDARG00000035150	SI:DKEY-261J4.4	si:dkey-261j4.4 [Source:ZFIN;Acc:ZDB-GENE-060531-125]	0.0814948	-0.0186492	0.0429161	0.079534	0.0923795	0.0230741	0.0276656	0.147916	0.020626	0.0932248	0.0585762	0.179889	0.0801358	0.0701231	0.0278011	-0.0303648
ENSDARG00000012388	COX4I1L	cytochrome c oxidase subunit IV isoform 1, like [Source:ZFIN;Acc:ZDB-GENE-130814-2]	0.127088	0.162184	0.0290901	0.0316119	0.193521	0.500108	-0.0594926	0.277564	0.0132927	0.0931263	0.222747	-0.0289341	-0.164709	0.173538	-0.109341	0.0621701
ENSDARG00000074642	ZGC:153932	zgc:153932 [Source:ZFIN;Acc:ZDB-GENE-070209-223]	0.0876628	0.0453127	0.069409	-0.00487644	0.0331308	0.165268	0.0107563	0.0416705	0.0816765	0.0931223	0.0727115	0.00581746	0.00289564	0.0326744	0.0714562	0.0446767
ENSDARG00000099968	BX322612.1	N/A	-0.0786728	0.147181	0.0200753	-0.017494	0.0285719	-0.0798262	0.0735674	-0.0110436	-0.0200055	0.0930946	0.0587966	0.0519123	0.0757087	0.112691	0.110411	0.0532082
ENSDARG00000101798	OR130-1	odorant receptor, family H, subfamily 130, member 1 [Source:ZFIN;Acc:ZDB-GENE-070806-44]	0.0505797	0.145334	0.184278	0.0861082	0.276621	0.0917376	0.232844	0.198988	-0.0804678	0.0930734	0.27605	0.157683	0.338634	0.289752	0.0514296	0.0749211
ENSDARG00000089750	SI:DKEY-26G8.5	si:dkey-26g8.5 [Source:ZFIN;Acc:ZDB-GENE-121214-19]	0.310543	0.0457366	-0.513966	-0.0169504	-0.241116	0.425779	-0.196947	-0.164168	0.0154153	0.0929505	-0.174357	-0.226853	0.00315344	-0.100289	0.240708	-0.171622
ENSDARG00000029003	EIF1AXA	eukaryotic translation initiation factor 1A, X-linked, a [Source:ZFIN;Acc:ZDB-GENE-041010-185]	0.0693307	-0.0239558	-0.0612379	-0.133014	0.31956	0.113017	-0.0106963	-0.00743778	0.151428	0.0929309	-0.00431305	-0.00742062	-0.00984626	-0.00467978	0.0966954	-0.0232314
ENSDARG00000073936	BX511021.2	N/A	-0.166124	0.231268	0.0698771	-0.0481885	0.118163	-0.114527	0.0145547	0.0773876	0.0161885	0.092435	-0.137447	0.0585098	0.0351176	-0.0195261	-0.217158	0.101858
ENSDARG00000092162	MHC1ZAA	major histocompatibility complex class I ZAA [Source:ZFIN;Acc:ZDB-GENE-030916-1]	0.0830548	0.0281666	0.0583957	0.0982059	0.0521218	0.024597	0.118796	0.0361244	0.0618985	0.0923198	0.155425	0.0539042	0.0509427	0.15059	0.184454	0.107094
ENSDARG00000104112	CR383680.3	N/A	-0.0159984	0.0431893	0.166329	-0.0659942	0.0375207	-0.125757	-0.0510506	0.132124	-0.0673512	0.0922133	-0.121385	0.181804	-0.170748	0.00887347	0.0524237	-0.165841
ENSDARG00000099461	ASB10	ankyrin repeat and SOCS box containing 10 [Source:ZFIN;Acc:ZDB-GENE-060929-1106]	0.0466796	0.165947	0.152872	0.175749	0.218252	0.172226	0.28108	0.213743	0.00410723	0.0921533	0.217221	0.0572656	0.218321	0.231314	0.102721	0.276127
ENSDARG00000103292	BX936303.4	N/A	0.271846	0.121915	0.084052	0.244434	0.0553195	0.142525	0.253153	0.169839	0.34997	0.0919967	0.139604	0.200029	0.356201	0.110204	0.00928289	0.23627
ENSDARG00000097138	SI:CH211-191C10.3	si:ch211-191c10.3 [Source:ZFIN;Acc:ZDB-GENE-131127-492]	0.00427426	0.00369499	-0.0207428	-0.00883357	-0.0524234	-0.0478252	-0.00806801	-0.0316701	-0.0201602	0.0917295	-0.00564776	-0.00573402	-0.0430841	0.0916439	-0.0327342	-0.00802528
ENSDARG00000074378	JUNBA	jun B proto-oncogene a [Source:ZFIN;Acc:ZDB-GENE-040426-2172]	0.105201	0.123785	0.116519	0.0151769	0.17838	0.242845	0.143332	0.189203	-0.130824	0.0917247	0.213516	0.0340625	-0.0606015	0.0636711	0.0994445	0.0207514
ENSDARG00000067981	ZGC:103697	zgc:103697 [Source:ZFIN;Acc:ZDB-GENE-040912-104]	0.0642489	-0.0291603	0.120605	0.0920851	0.081391	0.0312749	0.0720971	0.000957204	-0.040803	0.0916762	0.233253	0.0117289	0.143821	0.21051	-0.0224195	0.0732593
ENSDARG00000036895	DAP1B	death associated protein 1b [Source:ZFIN;Acc:ZDB-GENE-000511-4]	-0.0416249	0.0566755	-0.0561278	-0.0345734	0.203179	0.208138	0.146393	0.0778583	-0.0950964	0.0916756	0.278756	-0.153869	0.0931124	-0.00747868	-0.0308025	-0.131566
ENSDARG00000070437	RPL22	ribosomal protein L22 [Source:ZFIN;Acc:ZDB-GENE-051113-276]	0.12132	0.111991	-0.109307	-0.158611	-0.036889	0.0462378	-0.00463188	0.0391223	0.207134	0.0914643	-0.219597	0.0824126	-0.084539	-0.136492	0.03324	-0.214557
ENSDARG00000104302	CR391991.3	N/A	0.0119115	-0.000171117	0.0343701	0.108528	0.0304103	-0.0254661	0.0708853	0.03442	0.12385	0.0914116	0.022635	-0.00400413	0.0607844	-0.0179195	0.110098	0.0245274
ENSDARG00000056744	ELA2	elastase 2 [Source:ZFIN;Acc:ZDB-GENE-041117-1]	-0.0646333	-0.0588993	-0.0140404	0.0365076	-0.0804017	0.0096995	0.0553119	-0.0670135	-0.070456	0.0913151	-0.0307507	-0.0996211	0.0115153	0.0795888	-0.0597796	0.124602
ENSDARG00000104502	SI:DKEY-264F17.5	si:dkey-264f17.5 [Source:ZFIN;Acc:ZDB-GENE-120703-23]	0.712022	0.329525	0.112204	0.0621176	0.0527806	0.239516	-0.0610673	0.0389041	0.261718	0.0912723	0.10332	0.158546	0.128533	0.166183	0.294705	0.0892561
ENSDARG00000027169	KPNA7	karyopherin alpha 7 (importin alpha 8) [Source:ZFIN;Acc:ZDB-GENE-040426-2023]	-0.00364927	-0.0267776	-0.090219	-0.0632315	-0.119702	-0.0566402	-0.033117	-0.0328465	0.01223	0.0910158	-0.0934704	-0.0302653	0.0326096	-0.0018275	-0.140747	-0.115939
ENSDARG00000074079	SI:DKEY-3D4.3	si:dkey-3d4.3 [Source:ZFIN;Acc:ZDB-GENE-070912-527]	0.0738482	0.188472	-0.00622614	0.238578	0.133294	0.0280973	0.066048	0.0493369	0.00334162	0.0909519	0.281341	0.0845969	0.20353	0.148502	0.00632826	0.141306
ENSDARG00000102365	TCEB3	transcription elongation factor B (SIII), polypeptide 3 [Source:ZFIN;Acc:ZDB-GENE-040426-2810]	0.0556843	0.0724592	0.0436992	0.161568	0.264475	0.0699215	0.00501043	0.0265252	0.0567892	0.0905495	0.159745	-0.00862712	0.0607254	-0.00239048	-0.0428496	0.144143
ENSDARG00000107760	CABZ01084887.1	N/A	0.0995471	0.22404	0.179809	0.221467	0.2511	0.130278	0.160412	0.199497	-0.000346905	0.0901947	0.0862057	0.054555	0.0690126	0.115445	0.225609	0.0345753
ENSDARG00000022303	HIGD1A	HIG1 hypoxia inducible domain family, member 1A [Source:ZFIN;Acc:ZDB-GENE-030826-15]	0.110289	0.397049	0.14597	-0.0922887	0.206649	0.214903	0.107731	0.0207127	0.194196	0.0900987	0.0555587	0.174548	0.0358578	0.0660137	0.158871	-0.0734096
ENSDARG00000093364	MTMR3	myotubularin related protein 3 [Source:ZFIN;Acc:ZDB-GENE-091204-465]	-0.0717748	-0.0217588	0.133175	0.0916824	0.249343	0.238639	0.116874	-0.0688041	0.0442301	0.0899383	0.135465	-0.0312878	-0.15748	-0.121033	0.102611	-0.123775
ENSDARG00000009612	CHIA.3	chitinase, acidic.3 [Source:ZFIN;Acc:ZDB-GENE-040426-2891]	-0.00796967	0.0195954	0.0673737	0.0623131	-0.00310917	0.0223032	-0.00322615	0.024511	0.000776707	0.0898581	0.0209839	0.0769201	0.0636727	0.0404186	0.0699938	0.00195375
ENSDARG00000074052	SI:CH211-281G13.5	si:ch211-281g13.5 [Source:ZFIN;Acc:ZDB-GENE-090311-7]	-0.01622	-0.00622785	0.0387256	0.0391562	-0.00798652	0.0466009	0.0359879	0.0635355	0.0382787	0.0897018	0.0244095	-0.0573317	0.033283	0.0237751	0.0139277	-0.0414994
ENSDARG00000043640	CENPN	centromere protein N [Source:ZFIN;Acc:ZDB-GENE-030616-408]	0.162319	0.0770582	-0.0187357	-0.149308	-0.0114909	0.0794114	-0.144082	-0.231703	0.266838	0.0896426	-0.149787	0.116052	-0.0689239	0.0310199	0.164177	-0.231081
ENSDARG00000017722	SI:CH73-151M17.5	si:ch73-151m17.5 [Source:ZFIN;Acc:ZDB-GENE-131121-43]	0.0320962	0.131256	0.187213	0.100233	0.00982449	0.137498	0.0781346	-0.0434181	0.0688768	0.0892467	-0.00718457	0.177522	0.156565	0.252917	-0.0478822	0.0930387
ENSDARG00000088030	RPL35A	ribosomal protein L35a [Source:ZFIN;Acc:ZDB-GENE-040718-190]	0.0332153	0.0135761	-0.154062	-0.176417	0.0158717	0.0342099	-0.0763434	0.0393258	0.210189	0.0891517	-0.256105	0.0668373	-0.173618	-0.190484	0.071768	-0.250036
ENSDARG00000087324	CRYGM2D1	crystallin, gamma M2d1 [Source:ZFIN;Acc:ZDB-GENE-050522-395]	-0.299762	-0.211632	-0.148457	-0.0206424	0.204681	0.0742851	0.10165	-0.00701602	0.0793621	0.0889471	-0.0813226	0.018706	-0.0534484	-0.162721	-0.0586525	-0.00504087
ENSDARG00000101893	CR388178.1	N/A	0.085633	0.153266	0.0959642	0.015214	-0.00427238	0.0197061	0.0686991	0.0551446	0.00817466	0.0886878	0.143887	0.0087365	0.0143807	0.0826994	0.135076	-0.0122425
ENSDARG00000089296	SI:DKEY-240N22.6	si:dkey-240n22.6 [Source:ZFIN;Acc:ZDB-GENE-070705-411]	-0.0549899	0.0753176	0.0823448	0.0845197	0.0880819	-0.0351854	-0.113539	-0.060447	0.0867696	0.0885186	-0.0118101	0.124961	0.118408	-0.0349476	0.0134027	0.0795732
ENSDARG00000102112	BX677667.2	N/A	0.151564	-0.0498408	0.0886055	0.0538031	0.0067244	-0.0323299	-0.00273114	-0.0648269	0.1452	0.0884838	-0.0862993	0.0431365	0.0221326	-0.141129	-0.043747	0.143024
ENSDARG00000096720	CR352342.1	N/A	0.0804481	-0.00393995	-2.61e-05	0.0104074	-0.0139449	0.215222	-0.00547519	0.00457166	0.00121835	0.0884019	-0.0111136	0.0293724	0.149786	0.0594725	-0.00219101	0.0129141
ENSDARG00000100896	ZNF973	zinc finger protein 973 [Source:ZFIN;Acc:ZDB-GENE-080218-9]	0.0111736	-0.0619321	-0.0255626	-0.0951112	-0.0421144	-0.0762244	0.0161697	-0.0416008	-0.112917	0.0883331	0.034753	-0.199867	-0.0227931	-0.0444107	-0.194818	-0.0506626
ENSDARG00000029822	CEL.2	carboxyl ester lipase, tandem duplicate 2 [Source:ZFIN;Acc:ZDB-GENE-061110-10]	0.00849214	0.0651222	0.0414402	-0.0344895	0.0709713	-0.0771205	0.0386335	-0.101185	-0.06498	0.0882158	0.00571627	-0.0122685	0.12917	-0.0402564	-0.00679951	0.0236367
ENSDARG00000070774	IRGF1	immunity-related GTPase family, f1 [Source:ZFIN;Acc:ZDB-GENE-051212-5]	0.193477	-0.0176218	-0.0154765	0.0789266	0.0791223	0.128134	0.134913	0.0634721	0.0814352	0.0880847	0.00076169	0.0542446	-0.112665	0.0737396	-0.0163181	0.0681091
ENSDARG00000104787	SI:DKEY-28K24.2	si:dkey-28k24.2 [Source:ZFIN;Acc:ZDB-GENE-121213-4]	0.152462	0.22704	0.104151	0.0103371	0.0527325	0.0930749	0.0750789	0.171515	0.0171283	0.0879938	0.0143941	0.0414182	0.0429509	0.004161	0.0486389	0.116406
ENSDARG00000097840	SI:DKEY-42L23.6	si:dkey-42l23.6 [Source:ZFIN;Acc:ZDB-GENE-131121-619]	0.0635077	0.0847577	0.173222	0.0449547	0.0728225	0.0290985	0.0886258	0.0695585	0.0585351	0.0877386	0.107223	0.0402163	0.0445376	0.0953983	0.170045	0.0175756
ENSDARG00000104741	ZGC:173619	zgc:173619 [Source:ZFIN;Acc:ZDB-GENE-071004-58]	0.0354585	0.00191238	0.138322	-0.0472174	-0.0499957	-0.0230298	0.0707412	-0.0580932	-0.00160888	0.0875903	0.000410307	0.131328	0.0175534	0.190558	-0.0244875	0.0896624
ENSDARG00000010958	GLMNB	glomulin, FKBP associated protein b [Source:ZFIN;Acc:ZDB-GENE-080723-14]	-0.353496	0.0188267	0.143813	-0.0534121	0.0124005	-0.275211	0.0779742	0.0572277	-0.370211	0.0872856	-0.0867663	0.0955971	0.0728451	0.062001	-0.108894	0.168012
ENSDARG00000098115	SI:DKEY-178J11.5	si:dkey-178j11.5 [Source:ZFIN;Acc:ZDB-GENE-131118-10]	-0.050556	0.121786	0.122799	0.0368324	0.113967	0.0729303	0.133722	0.0558949	0.0126551	0.0872633	0.0266847	0.00878922	0.0451109	0.171277	0.0855834	0.100452
ENSDARG00000074738	PCDH2G9	protocadherin 2 gamma 9 [Source:ZFIN;Acc:ZDB-GENE-050610-31]	0.0854427	0.000126467	0.193156	-0.0120527	0.11691	-0.114721	0.299485	-0.016045	-0.0140795	0.0872261	0.307204	0.247657	0.174242	0.00426903	0.030435	0.000509423
ENSDARG00000098036	SI:CH211-69L10.4	si:ch211-69l10.4 [Source:ZFIN;Acc:ZDB-GENE-131127-259]	0.0365897	-0.0586282	-0.15099	-0.0742864	-0.135378	0.240814	-0.192577	-0.120202	0.138432	0.0872087	-0.167105	-0.0229399	-0.253156	0.0798545	-0.0793306	0.00678048
ENSDARG00000098174	ACADSB	acyl-CoA dehydrogenase, short/branched chain [Source:HGNC Symbol;Acc:HGNC:91]	0.304742	0.212046	0.263092	-0.119276	0.126125	0.0472709	0.156951	0.197967	-0.0711537	0.0871653	0.110575	0.0804074	0.0645518	-0.0424101	0.161428	0.156448
ENSDARG00000078844	BX571839.1	N/A	0.105831	0.0164614	-0.0747478	0.0141523	-0.01395	0.151405	-0.0603704	-0.0497227	0.0715697	0.0869955	0.0661072	0.1048	-0.00286759	0.0656455	0.0999517	0.0187123
ENSDARG00000094500	SI:CH211-238E22.4	si:ch211-238e22.4 [Source:ZFIN;Acc:ZDB-GENE-030131-3632]	-0.0834888	0.0950252	0.0422876	0.00203598	0.0145731	-0.0336693	0.127499	-0.0810976	0.085337	0.0869333	-0.047434	-0.00564341	0.0215314	-0.0172538	0.130595	-0.0225478
ENSDARG00000055551	PIMR64	Pim proto-oncogene, serine/threonine kinase, related 64 [Source:ZFIN;Acc:ZDB-GENE-091113-46]	0.0598725	0.0313934	0.0273067	0.0165596	0.0958145	-0.020388	0.0195232	-0.00999795	0.0104449	0.0868371	0.00543515	0.0830817	0.0188127	0.0116921	-0.0054288	0.0442434
ENSDARG00000086048	SI:CH211-229I14.2	si:ch211-229i14.2 [Source:ZFIN;Acc:ZDB-GENE-070705-123]	-0.0434598	0.0564229	0.0427768	-0.168814	0.161545	-0.271991	0.113695	0.00695218	0.0673814	0.0865161	0.0212041	-0.0030366	0.17752	0.0158136	-0.00845978	-0.0347832
ENSDARG00000104897	SI:DKEY-16P6.1	si:dkey-16p6.1 [Source:ZFIN;Acc:ZDB-GENE-081103-43]	-0.00384706	0.0648596	0.184809	0.151272	0.0176932	0.113059	0.165564	0.0356903	0.0612748	0.0864662	0.0367937	0.0661075	0.00983998	0.0859189	0.085935	0.180274
ENSDARG00000026359	PBLD2	phenazine biosynthesis-like protein domain containing 2 [Source:ZFIN;Acc:ZDB-GENE-050417-456]	-0.408291	-0.179874	-0.0180032	-0.219688	0.0830829	-0.0605855	0.0231163	0.114511	-0.367742	0.0864166	-0.20635	-0.278103	-0.151527	-0.24569	-0.166163	-0.2769
ENSDARG00000035438	MYHC4	myosin heavy chain 4 [Source:ZFIN;Acc:ZDB-GENE-030131-6206]	-0.0455812	-0.0749959	0.0812455	-0.0117586	0.0409579	-0.064915	0.0175452	0.0156959	-0.0615288	0.0864048	0.244523	0.0690507	-0.0146995	0.0105651	0.0134671	-0.0331011
ENSDARG00000069827	CRYGM2D11	crystallin, gamma M2d11 [Source:ZFIN;Acc:ZDB-GENE-071004-42]	-0.357764	-0.114781	0.281104	-0.105952	0.140983	-0.144	0.271609	0.189142	-0.306896	0.0863102	-0.0860819	0.182538	-0.10014	-0.145697	0.0303531	0.0786078
ENSDARG00000096628	BUC2L	bucky ball 2-like [Source:ZFIN;Acc:ZDB-GENE-030131-6407]	0.0407013	0.0319825	0.115558	0.0390092	0.0138056	0.00736235	0.0911145	0.085343	0.145705	0.0862882	0.035685	0.00826241	0.0401257	0.110166	0.0488025	0.0941686
ENSDARG00000103908	CABZ01084963.1	N/A	-0.024205	0.0326736	0.0506531	0.016264	0.265762	0.0649003	0.181351	0.184749	-0.0445549	0.0862207	0.180083	0.0440521	0.158667	0.0504073	-0.00419451	0.0530511
ENSDARG00000088711	LGALS1L1	lectin, galactoside-binding, soluble, 1 (galectin 1)-like 1 [Source:ZFIN;Acc:ZDB-GENE-030131-4905]	-0.123823	0.0358061	0.170589	0.0358044	-0.0645892	-0.0232106	0.0667349	0.13308	0.115507	0.0860746	0.124884	-0.0319709	-0.092235	-0.0172517	0.00204792	-0.2122
ENSDARG00000103247	ZNF993	zinc finger protein 993 [Source:ZFIN;Acc:ZDB-GENE-110914-103]	-0.0685596	0.0374107	0.0612684	-0.0109319	0.0273797	0.00503217	-0.0138263	-0.00197042	0.0896673	0.0859089	0.110151	0.0572146	0.138113	0.0634946	0.138341	-0.0359544
ENSDARG00000078069	RRM2	ribonucleotide reductase M2 polypeptide [Source:ZFIN;Acc:ZDB-GENE-990415-25]	0.0936151	0.157603	0.0566903	0.0135274	-0.129789	0.309612	-0.05768	0.0345546	0.100411	0.0858934	-0.0297762	-0.049483	0.0688582	0.095417	0.149753	0.00439898
ENSDARG00000076981	ZGC:198329	zgc:198329 [Source:ZFIN;Acc:ZDB-GENE-080226-6]	-0.0996409	-0.0778174	0.00515255	0.0904754	-0.0202686	0.0192897	-0.0470091	0.117366	-0.0122448	0.0858057	-0.0154487	-0.0638969	0.0523767	0.00928919	0.0750505	-0.0199504
ENSDARG00000102008	SI:DKEY-72L17.6	si:dkey-72l17.6 [Source:ZFIN;Acc:ZDB-GENE-110913-49]	0.191541	0.00943591	-0.139329	-0.105692	0.0933978	0.139343	-0.046561	0.0908899	-0.0797688	0.0855329	0.0171811	0.00593011	-0.117378	0.185681	0.189634	-0.0668808
ENSDARG00000103418	OR106-3	odorant receptor, family G, subfamily 106, member 3 [Source:ZFIN;Acc:ZDB-GENE-070806-56]	0.0762085	0.137899	0.165131	0.179619	0.237676	0.154004	0.06221	0.0851925	0.0291472	0.0854682	0.0805724	0.0497619	0.0909301	0.126951	0.0191708	0.0760789
ENSDARG00000018797	CRYGMXL1	crystallin, gamma MX, like 1 [Source:ZFIN;Acc:ZDB-GENE-050522-392]	-0.0411663	-0.195171	0.0658495	-0.175092	-0.131589	0.154947	-0.0636459	0.0068324	0.00233129	0.0854003	-0.28637	0.110243	-0.139555	-0.25651	-0.120329	-0.103241
ENSDARG00000105558	BTR07	bloodthirsty-related gene family, member 7 [Source:ZFIN;Acc:ZDB-GENE-110921-1]	-0.144844	0.042009	0.00977093	0.0267203	0.0331098	0.075212	-0.0854419	0.0278566	0.119843	0.0853787	-0.021437	-0.0298432	0.0219522	0.0549729	0.0342755	-0.0577806
ENSDARG00000032218	ACSS3	acyl-CoA synthetase short-chain family member 3 [Source:ZFIN;Acc:ZDB-GENE-060503-816]	0.0612018	-0.0857044	-0.200471	0.20338	0.0176927	0.0569588	-0.137703	-0.0264857	0.164313	0.0853331	-0.0764262	0.0283235	0.0488506	0.0199726	-0.157402	-0.0655575
ENSDARG00000101973	CR769782.1	N/A	0.0424736	0.0356951	0.0172682	-0.0081072	-0.055809	-0.0953803	-0.0334738	-0.0118811	0.0554336	0.0852746	-0.00446772	0.0731967	-0.0997432	-0.063205	0.0276872	-0.0815694
ENSDARG00000102753	SI:DKEY-109L4.3	si:dkey-109l4.3 [Source:ZFIN;Acc:ZDB-GENE-160113-11]	0.00338449	0.180802	0.169296	0.00868219	-0.00122565	-0.124329	0.0780883	0.0310274	0.0816743	0.085207	0.0652488	0.0161568	0.15534	-0.145731	0.177999	-0.0885046
ENSDARG00000098656	CT574575.1	N/A	0.102906	-0.0453752	-0.0564061	-0.0311349	-0.0668435	-0.0072839	-0.0370586	0.257	0.00281232	0.0851259	0.0163366	0.0644048	-0.073419	-0.048581	-0.00571154	-0.0717086
ENSDARG00000095252	SI:DKEY-40H20.1	si:dkey-40h20.1 [Source:ZFIN;Acc:ZDB-GENE-091113-44]	0.24239	-0.0531251	-0.04113	0.0906554	-0.0820816	0.242603	-0.0365565	-0.0485055	0.0229278	0.0850472	-0.0552738	0.0684565	0.185954	0.244648	-0.00727103	0.00438535
ENSDARG00000104608	CABZ01114193.1	N/A	0.134452	0.150508	0.0877115	-0.00733704	0.0845817	0.184963	0.0885708	0.0699105	0.0656146	0.084839	0.0868541	0.0538691	0.0985576	0.00500908	0.129846	0.0150235
ENSDARG00000078841	SI:CH211-195B13.6	si:ch211-195b13.6 [Source:ZFIN;Acc:ZDB-GENE-120215-27]	0.0369333	0.0294673	0.0300177	0.108787	0.0555529	-0.00335811	0.0445545	0.00333422	0.00529577	0.0848172	-0.0014222	-0.00129233	0.0214238	0.0341502	0.0389587	0.0337005
ENSDARG00000092028	SI:DKEY-4C23.3	si:dkey-4c23.3 [Source:ZFIN;Acc:ZDB-GENE-050208-668]	0.068167	0.0675914	0.0592808	0.123669	0.0447947	0.188574	0.172971	0.0628482	0.0900495	0.0847319	0.226175	0.13539	0.155072	0.122547	0.145157	0.125023
ENSDARG00000102368	TRIM35-23	tripartite motif containing 35-23 [Source:ZFIN;Acc:ZDB-GENE-060503-295]	0.00768686	0.0105265	-0.0086906	0.0946456	-0.00016304	-0.0261798	0.014097	0.0167032	0.00029905	0.0847036	0.0315197	-0.0326472	-0.0293622	-0.0155923	-0.00820314	0.079379
ENSDARG00000079760	ZGC:112998	zgc:112998 [Source:ZFIN;Acc:ZDB-GENE-050320-134]	0.0523426	-0.0256185	-0.0583595	-0.0844018	0.0163475	-0.151452	0.0336346	-0.183431	0.0098761	0.0842604	-0.0131823	0.0766123	-0.0571994	0.0904132	-0.00131442	-0.0316943
ENSDARG00000099867	BX927308.3	N/A	0.00531735	0.0358242	0.0407425	-0.0104796	0.0031797	0.0402257	-0.037474	-0.00830834	0.0886501	0.084243	0.0249224	0.0626628	0.00138964	-0.0122838	-0.0349484	0.0425225
ENSDARG00000102722	ITIH3B	inter-alpha-trypsin inhibitor heavy chain 3b [Source:ZFIN;Acc:ZDB-GENE-040426-2716]	-0.497742	-0.239643	-0.11462	-0.0436642	-0.0499448	-0.220284	0.208208	0.0923993	-0.355533	0.0840841	-0.270223	0.182996	0.164425	0.17564	-0.264361	0.156874
ENSDARG00000075929	SI:DKEY-219C10.4	si:dkey-219c10.4 [Source:ZFIN;Acc:ZDB-GENE-081105-151]	0.0220198	-0.0131738	0.0746667	-0.100453	0.00758474	-0.0657402	0.102726	0.0790515	-0.0654248	0.0840535	-0.0413744	-0.0805626	-0.00179239	0.125736	0.0490209	0.0436463
ENSDARG00000098636	SLC5A7	solute carrier family 5 member 7 [Source:HGNC Symbol;Acc:HGNC:14025]	0.0211995	0.0534198	-0.0445975	0.0664428	0.0242899	-0.0975255	-0.0506657	0.11671	0.0543823	0.0839558	0.164659	0.0156232	0.0389283	0.0528745	0.0705843	0.0415401
ENSDARG00000078101	SI:DKEY-121N8.3	si:dkey-121n8.3 [Source:ZFIN;Acc:ZDB-GENE-070912-362]	0.129747	0.158938	0.129051	0.157464	0.0391681	0.0570452	0.0874016	0.112336	0.0386691	0.0839111	0.0493355	-0.0645165	0.0405099	-0.0421213	0.0389873	0.0492894
ENSDARG00000078246	SI:CH211-114L13.4	si:ch211-114l13.4 [Source:ZFIN;Acc:ZDB-GENE-070424-113]	0.0117531	0.0531939	-0.0203813	-0.0630624	-0.0120849	-0.0745963	-0.0452183	0.0294277	-0.030644	0.0838578	0.00483373	-0.0410994	-0.0341093	-0.0287313	0.00889379	-0.00711874
ENSDARG00000104146	BX465848.1	N/A	0.0723974	0.134908	0.0785657	0.079036	0.0857044	0.00548029	0.0606952	0.0224028	0.000155794	0.0836824	0.124969	0.101615	-0.00931153	0.0685542	0.00684087	0.0214017
ENSDARG00000074638	LOXHD1B	lipoxygenase homology domains 1b [Source:ZFIN;Acc:ZDB-GENE-081104-370]	-0.0621011	0.0117666	0.0656826	-0.0206528	0.0681278	0.0494327	-0.00858252	0.02918	-0.0334222	0.0836699	0.0301732	0.00828787	0.010245	0.0283273	-0.00197669	-0.0327968
ENSDARG00000044023	NKL.4	NK-lysin tandem duplicate 4 [Source:ZFIN;Acc:ZDB-GENE-030131-7503]	0.136533	-0.00369298	0.00808283	0.0417717	0.0170826	0.0824063	0.121743	0.0407069	0.233539	0.0836354	0.0395628	0.205147	0.0116815	0.0791324	0.13021	0.0887974
ENSDARG00000098570	SI:CH211-8C17.2	si:ch211-8c17.2 [Source:ZFIN;Acc:ZDB-GENE-091204-254]	-0.0549342	-0.118038	-0.0179552	0.0405493	0.113742	0.0507552	0.0794704	0.0480889	0.0271972	0.0834943	0.120202	0.0685197	-0.041553	-0.103679	0.0984222	0.178315
ENSDARG00000097453	SI:CH211-225B7.5	si:ch211-225b7.5 [Source:ZFIN;Acc:ZDB-GENE-131121-217]	0.248505	0.211238	0.25161	0.138873	0.0739458	0.191231	0.12402	0.31747	0.306578	0.0834386	0.166321	0.160759	0.152358	0.159827	0.206616	0.128835
ENSDARG00000099877	SI:DKEYP-72E1.6	si:dkeyp-72e1.6 [Source:ZFIN;Acc:ZDB-GENE-120215-228]	0.0721951	0.0775563	0.0894628	0.251339	0.165355	0.276109	0.167761	0.233639	0.0863493	0.0833295	0.146103	0.156428	0.0666714	0.124703	0.11784	0.162882
ENSDARG00000104431	SLC1A3A	solute carrier family 1 (glial high affinity glutamate transporter), member 3a [Source:ZFIN;Acc:ZDB-GENE-030131-2159]	0.365493	0.151122	0.0548112	0.13269	0.14429	0.425382	-0.0866173	-0.0188417	0.494319	0.0832193	0.307299	0.141533	0.112044	0.0992422	0.161415	0.0734635
ENSDARG00000079653	CYP2X6	cytochrome P450, family 2, subfamily X, polypeptide 6 [Source:ZFIN;Acc:ZDB-GENE-050320-144]	-0.0899921	-0.0631423	0.0857014	0.011489	-0.0796672	0.0416645	0.0147824	0.0499462	0.0433468	0.0832025	-0.00570866	0.0750424	0.0498108	-0.0335021	-0.00243662	-0.00159362
ENSDARG00000104166	SI:CH211-232D10.1	si:ch211-232d10.1 [Source:ZFIN;Acc:ZDB-GENE-081103-11]	0.154669	0.084126	0.130818	0.00400834	0.0727376	0.0548059	0.199689	-0.183616	-0.00969962	0.0831426	0.124487	0.118081	0.250723	0.082125	-0.0291152	0.20593
ENSDARG00000101091	BX322597.1	N/A	0.123984	0.0397636	0.0327227	-0.146218	-0.087243	-0.261481	-0.134921	0.00640564	0.176541	0.0831359	0.00959212	-0.100287	0.0651315	0.11961	0.117165	-0.0304552
ENSDARG00000075054	RASGRF2A	Ras protein-specific guanine nucleotide-releasing factor 2a [Source:ZFIN;Acc:ZDB-GENE-111128-1]	-0.477344	-0.0780749	0.0215473	0.0137078	-0.0602568	-0.414848	0.0687739	-0.00282051	-0.418229	0.083103	-0.0262531	0.0842777	-0.0338238	-0.0173129	-0.0874642	0.0265277
ENSDARG00000097110	SI:DKEY-56F14.4	si:dkey-56f14.4 [Source:ZFIN;Acc:ZDB-GENE-131121-272]	-0.0765928	-0.0240595	-0.0653382	-0.201969	-0.301042	-0.0782276	-0.207381	-0.0177253	-0.090995	0.0830903	-0.250665	0.0912193	-0.0748745	-0.0886502	-0.0948491	-0.256865
ENSDARG00000094120	BX548047.3	N/A	-0.0050204	0.0897554	0.151721	-0.012187	0.145893	-0.00615843	0.0805622	0.0740344	0.0197812	0.0830768	-0.033213	-0.00828089	-0.0272276	-0.0194674	-0.00104312	-0.0117408
ENSDARG00000102557	FTR87	finTRIM family, member 87 [Source:ZFIN;Acc:ZDB-GENE-131127-62]	0.00716104	0.105384	0.117618	0.0131991	0.0914465	0.0513291	0.131128	0.046161	-0.14809	0.0830519	0.190696	0.134212	-0.0394545	0.0248866	-0.0114133	0.137789
ENSDARG00000094308	SI:DKEY-247I3.6	si:dkey-247i3.6 [Source:ZFIN;Acc:ZDB-GENE-110913-83]	-0.0811781	-0.243779	-0.0495937	0.163447	-0.130605	0.0655848	-0.0715511	0.0003836	-0.0762839	0.0825793	-0.0490358	0.0151819	0.0778574	0.213393	-0.18678	0.129417
ENSDARG00000030166	HYI	hydroxypyruvate isomerase [Source:ZFIN;Acc:ZDB-GENE-040426-1273]	0.117596	0.0291236	-0.0334917	0.162855	0.0941683	0.416607	0.1422	0.0143906	-0.0196032	0.0825297	0.0538726	0.191559	-0.046572	0.112248	0.188171	0.0423083
ENSDARG00000007823	ATF3	activating transcription factor 3 [Source:ZFIN;Acc:ZDB-GENE-040426-728]	0.308387	0.21059	0.129309	0.2026	0.122729	0.845926	0.0592428	0.0278878	0.315854	0.0825262	0.288191	0.151063	0.0465907	0.265744	0.190873	0.131439
ENSDARG00000010312	CP	ceruloplasmin [Source:ZFIN;Acc:ZDB-GENE-010522-1]	0.264002	0.127277	-0.11524	-0.0260679	0.139656	0.13311	0.147787	-0.0157861	-0.109841	0.0824692	0.239579	-0.090825	0.0873054	0.00364131	0.0956074	0.187364
ENSDARG00000074772	CCL44	chemokine (C-C motif) ligand 44 [Source:ZFIN;Acc:ZDB-GENE-131121-642]	-0.087585	0.12061	0.411686	0.0701688	0.255189	0.028305	0.0558328	0.207338	0.0117171	0.082432	-0.0577329	0.157405	-0.133549	0.057745	-0.0454604	0.149101
ENSDARG00000086518	SI:CH211-155O21.3	si:ch211-155o21.3 [Source:ZFIN;Acc:ZDB-GENE-121214-24]	0.206794	0.191607	0.00198285	0.0812311	0.0707358	0.0534792	0.138704	-0.013314	0.0806032	0.08238	0.124099	0.136295	0.109535	0.0563667	0.1951	0.0779533
ENSDARG00000074854	SH2D1AB	SH2 domain containing 1A duplicate b [Source:ZFIN;Acc:ZDB-GENE-091204-326]	0.00649914	0.0254087	-0.0374636	0.0558767	-0.00638238	-0.052856	-0.074238	-0.0128705	0.073088	0.0822696	-0.0982407	0.0425324	-0.0623625	-0.0418572	-0.0312031	-0.015863
ENSDARG00000078161	PRDM1C	PR domain containing 1c, with ZNF domain [Source:ZFIN;Acc:ZDB-GENE-080618-3]	0.0855633	0.0751375	-0.0138837	0.0542191	0.0438995	0.113433	0.139409	0.0320979	0.0952081	0.082214	0.157456	0.112226	0.055813	-0.0183107	-0.0653661	-0.0432656
ENSDARG00000105207	CABZ01084137.1	N/A	0.0935425	-0.0400938	0.111796	0.0469913	0.044776	0.0220138	-0.084097	0.153631	0.0992903	0.0822072	-0.00615108	0.118998	0.0140551	-0.0712445	-0.0193445	0.0924719
ENSDARG00000058476	STC1L	stanniocalcin 1, like [Source:ZFIN;Acc:ZDB-GENE-040426-1521]	-0.173004	0.115244	0.113271	0.119625	0.0941164	-0.0429034	0.0935365	0.00395403	-0.0865526	0.0820677	0.304641	0.141453	0.00205385	0.154379	0.0589896	0.0124355
ENSDARG00000099963	SI:CH211-223K15.1	si:ch211-223k15.1 [Source:ZFIN;Acc:ZDB-GENE-141215-3]	-0.0854816	0.0990828	-0.0316663	0.147369	0.0454674	-0.0228465	0.0914041	-0.0538893	0.0548829	0.0820392	0.0771037	-0.0820988	-0.12515	-0.0187953	-0.0297027	0.0520049
ENSDARG00000070206	SI:BUSM1-160C18.6	si:busm1-160c18.6 [Source:ZFIN;Acc:ZDB-GENE-030616-174]	-0.00890189	-0.0325231	-0.0109675	0.0268346	-0.0567161	-0.0368477	-0.0179224	0.0315718	-0.0183735	0.0820155	-0.0316387	0.00335812	0.0109923	-0.0441661	-0.00807879	0.0032486
ENSDARG00000036995	LSM6	LSM6 homolog, U6 small nuclear RNA and mRNA degradation associated [Source:ZFIN;Acc:ZDB-GENE-040625-50]	0.129174	0.108606	-0.0449032	-0.0595837	-0.183769	0.0753032	-0.0702835	0.136799	0.192054	0.0819324	-0.13294	0.115766	-0.0336098	-0.054265	0.176181	-0.00538139
ENSDARG00000076366	A2ML1	zgc:171446 [Source:ZFIN;Acc:ZDB-GENE-080205-1]	0.019551	0.0345478	0.173649	0.076552	0.183816	0.152048	0.108165	0.0978677	0.0148234	0.0818968	0.00461173	0.0130221	0.0826077	0.0668586	0.0598774	0.122432
ENSDARG00000076043	SI:DKEYP-73D8.9	si:dkeyp-73d8.9 [Source:ZFIN;Acc:ZDB-GENE-070912-685]	-0.0368144	-0.0168844	-0.0541198	0.0126614	-0.0661903	0.0672458	0.0216871	0.000578442	-0.0608921	0.0818528	-0.109459	0.0488085	0.0619726	-0.0120227	-0.00359528	0.0357536
ENSDARG00000093193	CHIA.6	chitinase, acidic.6 [Source:ZFIN;Acc:ZDB-GENE-030131-1140]	0.491135	-0.205672	0.013643	0.0108731	0.122025	0.171425	-0.0304643	-0.00804138	-0.11716	0.0817875	0.000113963	-0.0720883	0.00393547	0.0298591	0.015871	0.0233407
ENSDARG00000103602	PCDH1A3	protocadherin 1 alpha 3 [Source:ZFIN;Acc:ZDB-GENE-050202-3]	-0.184887	-0.170673	-0.0577153	-0.113909	-0.114691	-0.0971694	-0.00623446	-0.02527	-0.222675	0.0817679	-0.0497468	-0.00156032	-0.00196966	0.0337865	0.0636808	-0.0459914
ENSDARG00000092360	SI:CH211-51H9.6	si:ch211-51h9.6 [Source:ZFIN;Acc:ZDB-GENE-081104-234]	0.203996	0.0896484	-0.147062	0.113589	-0.0691933	0.176557	-0.0525777	0.0298074	0.335025	0.0817168	-0.237066	0.193788	-0.17656	0.162516	0.117546	0.0867398
ENSDARG00000043735	SI:DKEY-88N24.5	si:dkey-88n24.5 [Source:ZFIN;Acc:ZDB-GENE-041014-85]	0.00135754	0.0989582	0.144035	0.0272909	0.0709387	0.0390266	0.0833354	0.0159521	0.0322122	0.0817146	-0.00231433	0.0578167	-0.0833173	0.143089	0.103283	0.105471
ENSDARG00000101992	SI:DKEY-238K10.3	si:dkey-238k10.3 [Source:ZFIN;Acc:ZDB-GENE-070705-401]	0.279209	0.248063	0.140263	0.00914974	0.191928	0.124846	0.110778	0.0999659	0.0807923	0.0817127	0.108642	0.10123	0.211487	-0.0615924	-0.0212412	0.0341817
ENSDARG00000059951	PLD6	phospholipase D family, member 6 [Source:ZFIN;Acc:ZDB-GENE-030131-3825]	0.106882	0.103079	-0.0413989	-0.00568576	0.142234	0.0709954	0.111788	0.0685297	0.0738066	0.0816222	0.0571571	0.0475942	0.147371	0.0104921	0.0945625	0.0129917
ENSDARG00000097340	SI:CH211-33E4.2	si:ch211-33e4.2 [Source:ZFIN;Acc:ZDB-GENE-131121-201]	0.0526101	0.0465048	0.125672	0.0339964	-0.0115992	0.0238322	-0.000774281	0.0461979	0.124426	0.0814202	0.0333151	0.0600414	0.038294	0.183293	-0.0246251	0.0707976
ENSDARG00000043918	TACR3	tachykinin receptor 3 [Source:HGNC Symbol;Acc:HGNC:11528]	-0.125378	-0.0427319	0.00926741	-0.0798868	-0.00824496	-0.150938	0.0291173	-0.0287056	-0.0870913	0.0814023	0.0350128	-0.0250426	0.07252	-0.0471111	-0.0710329	-0.0498253
ENSDARG00000053862	CRYGMX	crystallin, gamma MX [Source:ZFIN;Acc:ZDB-GENE-030131-7732]	-0.287852	-0.14085	-0.0503831	-0.115825	-0.0422787	-0.117111	-0.063562	-0.124511	0.0178957	0.0813706	-0.112418	0.0561177	-0.0529102	-0.028989	0.0573606	-0.24197
ENSDARG00000086077	SI:CH211-156L18.4	si:ch211-156l18.4 [Source:ZFIN;Acc:ZDB-GENE-141219-18]	0.0365218	0.11987	0.0140125	0.195053	0.0325462	0.0580862	0.113964	0.100231	0.11761	0.0811829	0.151006	0.106021	0.0735067	0.144728	0.101798	0.0410919
ENSDARG00000027428	RPP30	ribonuclease P/MRP 30 subunit [Source:ZFIN;Acc:ZDB-GENE-050320-45]	0.104322	0.0962669	0.00624483	0.0398553	-0.0531194	0.121409	0.0101665	-0.0390698	0.19776	0.0809611	-0.0841106	0.0714204	0.230075	0.0285962	0.0931384	-0.0473501
ENSDARG00000016479	UGT5A1	UDP glucuronosyltransferase 5 family, polypeptide A1 [Source:ZFIN;Acc:ZDB-GENE-051120-60]	-0.0486303	0.299884	0.138431	-0.0156208	0.0893311	-0.0316215	0.0172582	0.0452862	-0.00529412	0.080722	0.0379107	-0.0353674	-0.0408224	-0.00289394	-0.0282799	-0.0148993
ENSDARG00000086266	CU467905.1	N/A	0.171417	0.144019	0.140321	0.0697529	0.0205234	0.243241	0.0103176	0.0216018	0.135127	0.0806022	0.264324	-0.0048923	0.11024	0.0698117	0.0466101	0.0432773
ENSDARG00000056339	STK31	serine/threonine kinase 31 [Source:ZFIN;Acc:ZDB-GENE-140106-59]	0.204413	-0.0152198	0.01244	0.204585	0.165978	-0.000457167	0.0652586	0.0512871	-0.0658735	0.0804599	0.0749925	0.174991	0.0872673	0.0782224	0.0703627	0.151256
ENSDARG00000034650	FABP7B	fatty acid binding protein 7, brain, b [Source:ZFIN;Acc:ZDB-GENE-040614-4]	0.11959	-0.0809843	-0.184792	0.122841	0.0407331	0.218544	-0.00966151	0.0907929	-0.0517804	0.0803402	0.0663608	0.0512116	0.0015178	0.111717	-0.135616	-0.0694699
ENSDARG00000006526	FN1B	fibronectin 1b [Source:ZFIN;Acc:ZDB-GENE-030131-6545]	0.138417	0.343976	0.159503	0.105422	0.313728	0.247898	0.288103	0.278139	0.0654572	0.0802587	0.553076	-0.0339654	0.228369	0.0463479	0.421816	0.0709765
ENSDARG00000014966	CCDC82	coiled-coil domain containing 82 [Source:ZFIN;Acc:ZDB-GENE-030131-5749]	0.0498204	-0.0529038	0.137254	0.112911	0.238247	0.0775517	0.150457	0.0306507	0.0424703	0.0802573	0.197337	0.0286972	0.0945485	-0.0273995	0.0365709	0.0148024
ENSDARG00000086184	FBXO48	si:dkey-202b17.4 [Source:ZFIN;Acc:ZDB-GENE-121214-308]	0.0253353	-0.0786532	0.216415	0.00675911	-0.0694828	-0.146463	0.224742	0.0899088	0.00762909	0.0799529	0.123363	0.139375	0.154748	0.161389	-0.0480236	-0.0258337
ENSDARG00000038000	CRLS1	cardiolipin synthase 1 [Source:ZFIN;Acc:ZDB-GENE-040426-2519]	0.146813	-0.0532206	0.0101168	-0.0710331	0.0639505	0.0492028	-0.156562	-0.17066	-0.0706992	0.0796753	-0.0759462	-0.150155	-0.139568	-0.225339	0.00956014	-0.152626
ENSDARG00000058410	ACBD5B	acyl-CoA binding domain containing 5b [Source:ZFIN;Acc:ZDB-GENE-070705-18]	-0.00677662	0.00234574	0.0362707	0.13441	0.0576896	-0.0394125	0.0873198	0.0409445	0.061352	0.0796669	0.0245532	0.0409176	0.0284335	0.0123128	0.0306012	0.0359076
ENSDARG00000097238	HBBA1	hemoglobin, beta adult 1 [Source:ZFIN;Acc:ZDB-GENE-990415-18]	-0.00180617	-0.0712657	-0.00775453	0.0457741	-0.0549429	-0.0191162	0.00772982	-0.0155746	-0.0665072	0.079613	-0.0698924	-0.043538	-0.0623304	-0.0490688	-0.074426	0.00123
ENSDARG00000098431	COMP	si:ch211-43f4.1 [Source:ZFIN;Acc:ZDB-GENE-160113-156]	-0.222491	0.115986	0.18573	0.071361	0.195452	-0.172529	0.115136	-0.00996144	-0.269243	0.0795343	0.0704532	-0.0965947	0.041438	0.024086	-0.13795	0.0340995
ENSDARG00000086185	CR318620.1	N/A	0.126835	-0.184839	-0.181987	0.0552512	-0.0790497	0.072564	0.111267	0.0740195	0.0188848	0.0794497	0.0517604	0.0185883	-0.10746	-0.0553083	-0.0913555	0.0421101
ENSDARG00000105335	SI:DKEY-241L7.2	si:dkey-241l7.2 [Source:ZFIN;Acc:ZDB-GENE-041014-240]	0.0423711	0.031741	0.0824731	0.00590919	0.0185033	0.0418882	0.0096627	0.0692343	0.0262765	0.0791501	0.015496	0.00663756	0.0689831	-0.00601544	0.0680237	0.0378553
ENSDARG00000102846	TRMT13	tRNA methyltransferase 13 homolog (S. cerevisiae) [Source:ZFIN;Acc:ZDB-GENE-050327-19]	0.239665	0.0304637	0.000267421	0.128507	0.183072	-0.0293617	-0.0286773	0.0578788	-0.00901894	0.0789474	0.0994683	0.0884325	0.155413	0.122227	-0.0816724	0.163082
ENSDARG00000092471	SI:DKEY-7J22.1	si:dkey-7j22.1 [Source:ZFIN;Acc:ZDB-GENE-131119-62]	0.071857	-0.0279677	0.0236156	0.045097	0.00234234	-0.126143	-0.0178249	-0.0353735	0.0179888	0.0788725	0.0359766	0.0245905	0.0122244	0.16177	0.142919	0.0773679
ENSDARG00000104842	CABZ01085069.1	N/A	-0.0167497	-0.181636	0.111144	0.0182675	0.0650881	0.0543467	0.0165096	0.0554077	-0.0660736	0.0788224	-0.0195906	0.244794	-0.0729905	-0.0353615	0.0737311	0.0549927
ENSDARG00000095191	SI:DKEY-57K2.7	si:dkey-57k2.7 [Source:ZFIN;Acc:ZDB-GENE-070912-559]	0.0549985	0.0119083	0.0517754	0.19748	0.0626834	-0.0669733	0.16942	0.0522271	0.0266038	0.0787086	0.119872	-0.106876	0.206811	-0.00675777	-0.0422585	0.145951
ENSDARG00000102352	AL954822.1	N/A	0.00702395	0.129866	0.0964947	0.0527599	0.0854297	0.00425145	-0.0340401	0.00488017	0.02524	0.0786577	0.0137428	0.0131287	0.0894073	0.0392049	-0.0504828	0.0236015
ENSDARG00000052039	CASPB	caspase b [Source:ZFIN;Acc:ZDB-GENE-020812-1]	0.0178188	-0.0902249	0.181757	-0.255467	-0.0139314	0.222967	0.165233	0.175875	0.215604	0.0786561	0.27272	0.0577886	0.160204	0.0597517	0.190635	-0.116377
ENSDARG00000043482	B3GNT3	zgc:86586 [Source:ZFIN;Acc:ZDB-GENE-040625-129]	0.0510207	0.143271	0.239749	0.0231909	0.413491	-0.0193608	0.304823	0.193569	-0.057833	0.0779726	0.190564	0.0359989	0.106371	-0.31196	0.238553	-0.0581574
ENSDARG00000036155	GLA	galactosidase, alpha [Source:ZFIN;Acc:ZDB-GENE-041010-207]	-0.0281586	0.0764448	0.099922	0.0798674	-0.085316	0.077091	-0.0388225	0.0221149	0.0820329	0.0777728	-0.0475331	-0.0758358	0.000297945	-0.104961	-0.0125736	-0.170422
ENSDARG00000059841	EXOSC1	exosome component 1 [Source:ZFIN;Acc:ZDB-GENE-080926-3]	0.0118073	0.244557	0.239876	0.240958	0.202493	-0.019829	0.300183	0.224767	0.0455612	0.0777352	0.145732	0.0618164	0.278408	0.227703	0.178185	0.138532
ENSDARG00000003475	SULT1ST5	sulfotransferase family 1, cytosolic sulfotransferase 5 [Source:ZFIN;Acc:ZDB-GENE-050809-2]	-0.136554	0.540699	-0.00336164	0.000205927	0.305063	-0.184855	-0.0706268	0.130294	-0.014018	0.0776801	-0.279721	-0.0914928	-0.17851	0.00305413	-0.104955	-0.0959959
ENSDARG00000101406	RPLP2	ribosomal protein, large P2 [Source:ZFIN;Acc:ZDB-GENE-031018-2]	0.00516443	0.0572635	-0.128662	-0.075766	0.062438	0.0739352	0.0424195	0.156211	0.195004	0.0775194	-0.0882166	0.0956481	0.027824	-0.10882	0.0806579	-0.0233535
ENSDARG00000096669	SI:CH73-301J1.1	si:ch73-301j1.1 [Source:ZFIN;Acc:ZDB-GENE-121214-288]	0.168498	0.282467	0.0188158	0.082479	0.200687	0.0178972	0.0203261	0.198493	0.231336	0.0774698	0.117267	0.149571	0.318387	-0.0141703	0.153192	0.0761003
ENSDARG00000092281	FLNB	filamin B, beta (actin binding protein 278) [Source:ZFIN;Acc:ZDB-GENE-041026-1]	-0.318013	0.0182795	0.3589	0.016153	0.3725	-0.119391	0.220589	0.228683	-0.19149	0.0771485	0.0880298	-0.0442426	-0.0245239	0.108769	-0.00139665	0.0513985
ENSDARG00000004702	IRF2BP2A	interferon regulatory factor 2 binding protein 2a [Source:ZFIN;Acc:ZDB-GENE-030131-7809]	-0.0370508	0.0786552	-0.0201743	0.0506778	0.283305	0.0631696	0.109833	0.158241	0.00115465	0.0770574	0.180035	0.0939519	0.0371317	0.0389547	-0.0983489	0.158293
ENSDARG00000102401	ZNF1001	zinc finger protein 1001 [Source:ZFIN;Acc:ZDB-GENE-080213-7]	0.0168832	-0.036458	0.00776119	0.273101	0.205515	-0.109036	0.111596	0.00486455	0.292736	0.0770183	0.0331629	0.103227	0.0214334	0.158779	0.0364184	0.126702
ENSDARG00000102370	ZNF1094	zinc finger protein 1094 [Source:ZFIN;Acc:ZDB-GENE-120703-39]	0.0165543	0.023794	0.0241393	0.0689179	0.0043028	-0.04377	0.0978603	0.0886472	0.0426771	0.0767895	-0.053893	-0.00544729	0.0772381	0.104745	0.0263202	-0.0331376
ENSDARG00000077427	GPR20	G protein-coupled receptor 20 [Source:ZFIN;Acc:ZDB-GENE-140106-136]	-0.0351802	-0.0036807	0.0408386	0.0720703	0.0485352	-0.0120395	0.0625634	0.0258762	0.0298439	0.0767193	-0.0141088	0.0581542	-0.0156103	0.10097	0.0268823	-0.0284027
ENSDARG00000027620	BCO2L	beta-carotene 15, 15-dioxygenase 2, like [Source:ZFIN;Acc:ZDB-GENE-010509-1]	-0.0777029	0.0917995	0.0715993	0.0340434	0.0643273	-0.0104605	-0.0254065	0.0201905	0.134337	0.0766743	-0.00685679	-0.0807412	-0.0702994	0.0295949	0.0476122	-0.0196076
ENSDARG00000098114	CTSA	cathepsin A [Source:ZFIN;Acc:ZDB-GENE-030131-537]	0.154412	0.0219229	-0.00413025	0.110105	0.0249891	0.164269	0.0793654	0.036819	-0.00260332	0.0766627	0.228644	0.0779234	-0.069405	-0.0176707	0.0431945	0.0784478
ENSDARG00000097698	SI:DKEY-117A8.4	si:dkey-117a8.4 [Source:ZFIN;Acc:ZDB-GENE-131127-549]	0.0396169	0.066776	0.0728154	0.0421482	0.028335	-0.0319568	0.0158355	0.0182812	0.0196893	0.0761706	0.0409371	-0.0516675	0.0500489	0.147412	0.0132634	0.0648306
ENSDARG00000061916	TMEM51B	transmembrane protein 51b [Source:ZFIN;Acc:ZDB-GENE-030131-5373]	0.00363355	0.0592936	-0.0754943	0.0184874	-0.00564146	0.15495	0.0101893	0.074614	-0.0968793	0.0761392	0.0919629	-0.0713821	-0.0475171	-0.00677472	-0.0651127	-0.140882
ENSDARG00000095325	SI:DKEY-49N23.3	si:dkey-49n23.3 [Source:ZFIN;Acc:ZDB-GENE-050208-799]	-0.0683197	-0.0897032	0.014405	-0.00195836	-0.054226	-0.126884	-0.201595	-0.037547	-0.0122959	0.0761035	-0.113987	0.0891169	-0.0499247	0.0309423	-0.0925622	-0.102026
ENSDARG00000096618	BX000534.1	N/A	-0.0427442	0.0357007	0.0909621	0.0253136	-0.0243257	0.0367551	0.0030738	0.0180156	0.0167777	0.0760107	-0.0165875	-0.0671106	0.0360461	0.028604	0.15102	0.0236834
ENSDARG00000103437	CABZ01075923.1	N/A	0.0139875	0.0707617	0.0286185	0.0146637	0.054081	0.0199543	0.077974	0.0611641	0.00625785	0.0759265	0.0605041	0.0108286	0.0538756	0.00672929	0.0342764	0.0135846
ENSDARG00000016918	ACE2	angiotensin I converting enzyme 2 [Source:ZFIN;Acc:ZDB-GENE-041114-6]	0.0103306	0.18022	0.0519189	0.0314691	0.106908	0.04489	0.0420636	0.0192808	0.0149169	0.0759124	0.00299332	0.0550496	0.0284588	0.106083	0.0357017	0.0380075
ENSDARG00000104415	SI:CH73-236C18.6	si:ch73-236c18.6 [Source:ZFIN;Acc:ZDB-GENE-121213-9]	-0.0972283	0.0989846	0.0954293	0.0399738	-0.109781	-0.107445	-0.00104062	-0.00985051	-0.0344193	0.0758601	0.0386203	-0.0806541	0.0506725	0.116968	0.0296123	0.119578
ENSDARG00000052016	CABP2A	calcium binding protein 2a [Source:ZFIN;Acc:ZDB-GENE-050913-25]	-0.137419	-0.024622	0.109018	-0.033144	-0.0486605	0.100699	0.135899	0.0753812	0.0173981	0.0758427	0.00341817	-0.0926301	-0.0427928	0.0538596	0.132361	0.10992
ENSDARG00000101598	SI:CH211-215P11.1	si:ch211-215p11.1 [Source:ZFIN;Acc:ZDB-GENE-060531-33]	0.20738	0.279942	-0.143192	-0.0542166	0.0559865	0.0439139	0.0537888	0.0449853	-0.15102	0.0757135	0.0180421	0.0641566	0.145367	0.0142469	-0.00733297	-0.129515
ENSDARG00000076780	ACADSB	acyl-CoA dehydrogenase, short/branched chain [Source:ZFIN;Acc:ZDB-GENE-070410-109]	0.0092593	0.0422467	-0.164889	0.206496	0.042372	0.0933179	0.0542518	-0.0129737	0.128526	0.0756191	0.0990922	0.0443747	0.15553	0.020231	-0.0385238	0.138634
ENSDARG00000105956	CABZ01002702.1	N/A	0.128842	-0.0134808	-0.0140435	0.0235759	-0.0260161	0.00370583	0.0479025	0.0716862	-0.0630171	0.0755902	0.0775565	0.032471	-0.0290865	0.0059301	-0.0494187	0.0186119
ENSDARG00000104174	CABZ01055168.2	N/A	-0.124528	0.120511	-0.0182342	-0.00537927	-0.0582285	0.0758467	0.104529	0.0249911	-0.0455267	0.0752588	0.118742	0.0836139	0.0530444	-0.088408	-0.0229209	0.0375332
ENSDARG00000109164	CABZ01045617.2	N/A	-0.0554633	-0.0401174	0.00225104	0.085414	0.0763209	0.183524	0.0537035	0.0661535	0.0528218	0.0751765	-0.0127042	0.0151694	-0.0114037	0.160766	0.0203116	0.106406
ENSDARG00000105346	ZP2.2	zona pellucida glycoprotein 2, tandem duplicate 2 [Source:ZFIN;Acc:ZDB-GENE-010622-1]	0.0087931	0.0631581	0.0545165	0.0789695	0.0365593	0.0933797	0.0198187	0	0.03671	0.0749458	0.0934467	0.00816919	0	0	0.104812	0.0171654
ENSDARG00000045006	PTPRGA	protein tyrosine phosphatase, receptor type, g a [Source:ZFIN;Acc:ZDB-GENE-101101-4]	-0.00208674	-0.0402578	0.0913669	-0.138343	0.0371803	-0.00490529	0.122108	0.150409	0.022743	0.074925	0.0481019	0.0723983	-0.135888	-0.102824	0.0792186	0.0232217
ENSDARG00000057173	IFIT8	interferon-induced protein with tetratricopeptide repeats 8 [Source:ZFIN;Acc:ZDB-GENE-051127-17]	0.0763412	0.130346	0.0458182	0.0218098	0.0700354	-0.00121013	0.0473738	0.0347588	0.031514	0.0747098	0.0981709	-0.00258571	0.0612829	0.0275455	0.0788995	0.0278222
ENSDARG00000038392	SI:DKEYP-52C3.5	si:dkeyp-52c3.5 [Source:ZFIN;Acc:ZDB-GENE-110411-268]	-0.0208858	-0.0172249	-0.0359742	-0.00565106	0.0364623	0.0279635	-0.0199752	0.0200448	0.00588908	0.0746775	0.0338385	0.034564	0.00930375	0.024115	-0.0151039	0.037317
ENSDARG00000058556	MUC5.2	mucin 5.2 [Source:ZFIN;Acc:ZDB-GENE-121108-1]	-0.0429558	0.317714	0.470423	0.19665	0.495639	-0.173249	0.444273	0.217821	0.0526181	0.0745084	-0.0674345	0.0587016	-0.1594	-0.00975457	-0.00224625	0.0319369
ENSDARG00000069192	ZGC:163030	zgc:163030 [Source:ZFIN;Acc:ZDB-GENE-060810-77]	-0.00217492	0.158857	-0.138719	0.0582288	-0.161704	-0.0169741	0.0907892	0.231623	0.0984661	0.0745007	0.0742162	0.0773068	0.152782	0.0411679	0.169088	0.0588387
ENSDARG00000069548	ZGC:162780	zgc:162780 [Source:ZFIN;Acc:ZDB-GENE-070410-92]	-0.0639398	0.0657939	0.172045	0.190402	0.0773019	-0.188468	-0.0863394	-0.247117	0.0230332	0.0744505	0.133999	0.103462	-0.0943438	-0.0563261	-0.0925956	-0.0236792
ENSDARG00000098464	CABZ01060490.1	N/A	0.0324266	-0.0112969	-0.054529	0.062775	-0.118948	0.0695781	0.0655165	0.0424903	0.108022	0.0744194	0.0460105	0.185718	0.072947	-0.00376706	0.0862285	0.10566
ENSDARG00000091727	RNF14	ring finger protein 14 [Source:HGNC Symbol;Acc:HGNC:10058]	0.0707188	-0.0422488	-0.318992	0.0566357	-0.103689	0.144948	-0.0596753	0.0948532	0.0331985	0.0743818	-0.0202335	-0.00924851	0.104437	-0.099434	0.0846252	0.0434354
ENSDARG00000055192	ZGC:136930	zgc:136930 [Source:ZFIN;Acc:ZDB-GENE-060312-16]	-0.405417	-0.131311	-0.262112	-0.119631	-0.0766863	-0.0683685	0.270102	0.19246	-0.428415	0.0743119	-0.238679	-0.0182331	-0.0576437	-0.00691295	-0.167797	-0.060445
ENSDARG00000089070	SI:DKEY-33C12.12	si:dkey-33c12.12 [Source:ZFIN;Acc:ZDB-GENE-081028-30]	-0.0275283	0.0256055	-0.0303311	0.0307851	0.0438375	0.0152487	0.0546911	0.0284807	0.029737	0.0738736	0.0401565	-0.0070374	0.0141865	-0.00744316	0.0618995	0.00542287
ENSDARG00000075159	MFI2	antigen p97 (melanoma associated) identified by monoclonal antibodies 133.2 and 96.5 [Source:ZFIN;Acc:ZDB-GENE-050309-40]	-0.252921	-0.127538	0.0090294	-0.0532468	0.0579067	-0.256581	0.0238666	-0.0204636	-0.252695	0.0738276	-0.106424	-0.0667327	0.140735	-0.0838299	-0.242824	0.145238
ENSDARG00000070542	MAFBB	v-maf avian musculoaponeurotic fibrosarcoma oncogene homolog Bb [Source:ZFIN;Acc:ZDB-GENE-010605-4]	-0.0121449	0.0917302	0.00747946	0.0425671	0.0571634	0.000665145	0.12479	0.0889416	0.0647918	0.0734987	0.0110332	-0.00884509	-0.0247682	-0.00261687	0.0245823	0.00839342
ENSDARG00000035333	MIS18A	MIS18 kinetochore protein A [Source:ZFIN;Acc:ZDB-GENE-091204-314]	0.343553	-0.119651	-0.122164	0.00547158	-0.0560979	0.21035	-0.148567	-0.0552128	0.271172	0.0734902	-0.200133	0.0305521	-0.057252	-0.00450067	0.162085	-0.0709507
ENSDARG00000052646	FTR69	finTRIM family, member 69 [Source:ZFIN;Acc:ZDB-GENE-090508-10]	0.0669706	0.0535218	0.0736565	-0.0361725	0.0677743	0.032446	-0.0507299	-0.0180351	0.176155	0.0733075	-0.134134	0.0455345	0.0296481	0.128887	0.0272697	0.0312945
ENSDARG00000102376	CACNG2B	calcium channel, voltage-dependent, gamma subunit 2b [Source:ZFIN;Acc:ZDB-GENE-090624-3]	-0.327539	-0.165288	-0.058657	-0.208691	0.130489	0.0147201	0.0249991	0.0921955	-0.114676	0.0732943	-0.0043315	0.122966	-0.113338	-0.109078	0.00637324	0.0415297
ENSDARG00000103405	ZNF1102	zinc finger protein 1102 [Source:ZFIN;Acc:ZDB-GENE-071004-71]	0.106828	0.155056	0.219059	0.194602	0.168907	0.124376	0.211933	0.117712	0.0640655	0.0730413	0.168475	0.0693543	0.113911	0.169213	0.091468	0.0576729
ENSDARG00000053620	EBI3	Epstein-Barr virus induced 3 [Source:ZFIN;Acc:ZDB-GENE-070912-615]	0.10196	-0.0293552	-0.13592	0.0399937	0.0590506	-0.0508209	-0.0487109	-0.0272966	0.164039	0.0729294	0.111766	0.0902053	-0.021621	0.0431401	-0.0830824	0.0566936
ENSDARG00000092133	SI:DKEY-84O3.7	si:dkey-84o3.7 [Source:ZFIN;Acc:ZDB-GENE-091113-30]	-0.0803043	0.0350191	-0.0844576	-0.0254468	-0.0371571	-0.0477049	-0.1209	-0.121106	-0.131481	0.0726011	-0.128012	-0.0858139	-0.135519	-0.0911933	-0.00631247	-0.0024244
ENSDARG00000095744	SI:DKEY-269I1.4	si:dkey-269i1.4 [Source:ZFIN;Acc:ZDB-GENE-121214-37]	0.235608	0.0888742	-0.182014	-0.0576854	-0.0541255	0.195228	-0.10019	0.00830008	0.0391351	0.072584	0.134524	0.0324947	0.171338	0.0652762	0.141614	-0.00650361
ENSDARG00000104363	CARTPT	CART prepropeptide [Source:HGNC Symbol;Acc:HGNC:24323]	0.0317633	-0.0162964	0.04274	0.0226858	-0.0513053	0.0967991	0.045527	0.0250119	-0.021387	0.07254	0.0130568	0.0673051	0.091358	0.033076	0.0670755	-0.00225573
ENSDARG00000102113	SI:CH211-193L2.7	si:ch211-193l2.7 [Source:ZFIN;Acc:ZDB-GENE-141216-393]	0.244823	0.118346	-0.0742084	0.0127621	-0.0292875	0.245827	-0.192521	-0.0353371	0.663263	0.0725397	-0.0760444	0.096658	0.0423075	0.007353	0.151118	-0.183275
ENSDARG00000105038	CABZ01038376.1	N/A	0.0442156	0.106374	0.0608829	0.00761544	0.0711689	0.0948218	0.171754	0.132841	0.109543	0.072539	0.0149961	0.133045	0.0861825	0.0930547	0.141738	0.0402415
ENSDARG00000099337	SI:CH211-209J12.2	si:ch211-209j12.2 [Source:ZFIN;Acc:ZDB-GENE-120709-33]	-0.0114197	0.159808	0.0198076	-0.0139039	-0.0902356	0.0898585	0.0163249	0.0610471	0.0559768	0.0724889	0.0622715	0.0648455	0.102568	-0.0271344	0.00577487	0.0320267
ENSDARG00000068919	RAD51C	RAD51 paralog C [Source:ZFIN;Acc:ZDB-GENE-041010-204]	0.025442	0.203503	0.197004	0.105067	0.188539	0.120886	0.0468664	0.171411	0.282295	0.0721426	0.0381035	0.0265805	-0.159419	-0.101122	-0.0336455	0.0010957
ENSDARG00000075936	SUGP1	SURP and G patch domain containing 1 [Source:ZFIN;Acc:ZDB-GENE-070615-33]	0.223379	0.0681978	0.0948629	0.131816	0.0890149	0.0453519	-0.0336306	0.194412	0.127259	0.0720849	0.278423	0.131861	0.119915	0.266694	0.0402675	0.218394
ENSDARG00000038681	MFAP4	wu:fj11g02 [Source:ZFIN;Acc:ZDB-GENE-030131-7370]	0.0498853	0.0201914	0.105723	0.028253	0.0701974	0.076319	0.00520027	0.0782975	0.0847496	0.0718334	0.132325	0.0796703	0.0465624	0.0404645	0.0328586	0.0786945
ENSDARG00000076644	KCNV2A	potassium channel, subfamily V, member 2a [Source:ZFIN;Acc:ZDB-GENE-091117-27]	-0.257697	0.124955	0.228222	0.00135273	0.32426	0.00250014	0.120517	0.246434	-0.0706439	0.0717008	0.131307	0.0871596	0.33422	0.0208599	0.0528466	0.139945
ENSDARG00000092025	SI:DKEY-121N8.8	si:dkey-121n8.8 [Source:ZFIN;Acc:ZDB-GENE-070912-367]	0.104125	-0.0190124	0.0534894	0.0486579	0.0212507	0.0519544	0.0759246	0.0359509	-0.0325559	0.0716572	0.100532	-0.0107035	0.0729389	0.0367368	0.0651384	0.0329232
ENSDARG00000099315	NSDHL	NAD(P) dependent steroid dehydrogenase-like [Source:ZFIN;Acc:ZDB-GENE-050417-163]	-0.116479	-0.142207	-0.00145844	-0.1092	0.0311861	-0.234739	0.0324152	0.0409862	-0.145676	0.0716535	-0.245419	-0.0961791	0.0269269	-0.0168783	-0.125872	0.0313734
ENSDARG00000087670	HIST1H4L	histone 1, H4, like [Source:ZFIN;Acc:ZDB-GENE-070927-10]	0.051375	-0.0149083	0.0104174	-0.00491543	0.0839782	0.0524703	0.0485754	0.0354225	0.0262904	0.0716454	0.0117719	-0.000209009	-0.00504713	0.0134522	0.0435239	0.0587212
ENSDARG00000087071	CHRNA4A	cholinergic receptor, nicotinic, alpha 4a [Source:ZFIN;Acc:ZDB-GENE-130530-903]	0.0962521	0.113304	0.00449748	0.0135332	0.097491	0.0343657	-0.000960759	-0.000502506	-0.0461017	0.0716427	0.0335726	0.0342226	-0.0124688	-0.0290038	0.024626	-0.0102199
ENSDARG00000037873	CYP3C3	cytochrome P450, family 3, subfamily c, polypeptide 3 [Source:ZFIN;Acc:ZDB-GENE-041114-102]	0.0414794	-0.146258	-0.0797098	-0.0800236	-0.107873	-0.227729	-0.023857	-0.0430189	-0.0580226	0.0715717	0.180282	0.0452385	0.0203884	-0.194938	0.00668274	-0.0322051
ENSDARG00000090783	MFAP4	microfibrillar-associated protein 4 [Source:ZFIN;Acc:ZDB-GENE-040426-2246]	0.226861	0.0553659	0.103361	0.106663	0.119922	0.241325	0.0736584	0.0589795	0.224158	0.0715054	0.211153	0.123315	0.154905	0.0579401	0.458131	0.248914
ENSDARG00000090591	HIST1H4L	histone 1, H4, like [Source:ZFIN;Acc:ZDB-GENE-070927-10]	0.130368	0.0373224	-0.0161596	-0.0306041	0.0975149	0.156185	0.065632	0.0378434	0.0837145	0.0715042	0.0310161	0.0977762	0.110969	0.0493363	0.169095	0.154214
ENSDARG00000093872	CU137716.1	N/A	0.0781187	0.0819466	-0.0191266	0.0027736	0.15523	0.138682	-0.0707678	-0.0840557	0.0240122	0.0712675	-0.0791667	-0.239629	-0.188405	0.0814548	0.0115077	-0.116654
ENSDARG00000100335	ZNF1104	zinc finger protein 1104 [Source:ZFIN;Acc:ZDB-GENE-110913-152]	-0.00626724	-0.239473	-0.116434	-0.0629642	-0.127574	-0.0325384	-0.172131	-0.155954	-0.0863047	0.0710193	0.0390436	-0.0797948	-0.228442	0.01176	-0.0689596	-0.109625
ENSDARG00000090120	SI:DKEY-248G21.1	si:dkey-248g21.1 [Source:ZFIN;Acc:ZDB-GENE-131119-67]	-0.0642846	0.380955	-0.0301571	-0.2007	-0.00217668	-0.221391	0.0517155	-0.120729	0.0650039	0.0709279	0.0029906	-0.213588	-0.0896296	-0.145637	0.170254	0.0159149
ENSDARG00000099825	SI:DKEY-16P6.1	si:dkey-16p6.1 [Source:ZFIN;Acc:ZDB-GENE-081103-43]	0.0634433	0.011997	-0.12075	-0.0153816	-0.0583801	-0.0427336	0.00364301	-0.133892	-0.0914727	0.0708736	-0.119965	-0.159474	0.0145972	-0.0346823	-0.142637	0.0893295
ENSDARG00000096756	SI:CH211-196C10.13	si:ch211-196c10.13 [Source:ZFIN;Acc:ZDB-GENE-130603-71]	-0.0696784	0.0319673	0.0786859	0.00287356	0.16781	-0.0279555	0.0831367	-0.00334268	-0.0471115	0.0708532	0.013554	-0.0307106	-0.00584353	-0.0723372	-0.0139397	-0.0122669
ENSDARG00000056099	GTF2H5	general transcription factor IIH, polypeptide 5 [Source:ZFIN;Acc:ZDB-GENE-041001-144]	0.148371	-0.0204948	-0.03055	0.046607	-0.168914	-0.0153462	0.0133014	0.0266759	0.126658	0.0708027	-0.136765	0.123372	-0.0607415	0.0620021	0.0822346	0.053324
ENSDARG00000101851	ZNF976	zinc finger protein 976 [Source:ZFIN;Acc:ZDB-GENE-131119-69]	0.0701921	0.156923	0.026238	-0.0564383	0.0396265	0.114527	0.162307	0.0226813	0.0268618	0.0707642	0.0100768	0.0605298	0.074967	-0.0834034	0.133239	-0.100569
ENSDARG00000062217	KCNJ3B	potassium inwardly-rectifying channel, subfamily J, member 3b [Source:ZFIN;Acc:ZDB-GENE-120215-38]	-0.0633815	-0.0251934	0.116318	-0.0477704	0.106713	0.00688942	0.0677346	-0.0926267	-0.194241	0.0706517	0.133464	-0.0449577	0.0239124	0.0329541	-0.0858174	0.0358115
ENSDARG00000022532	CHRNB1L	cholinergic receptor, nicotinic, beta 1 (muscle) like [Source:ZFIN;Acc:ZDB-GENE-060811-1]	-0.0500197	-0.0615759	0.110753	0.104952	-0.0135676	0.0418854	0.0797712	0.0617134	-0.0608551	0.0705607	0.146456	0.0333703	-0.158864	-0.0922733	0.0296035	0.195847
ENSDARG00000011648	SNRPD1	small nuclear ribonucleoprotein D1 polypeptide [Source:ZFIN;Acc:ZDB-GENE-020419-14]	0.121754	0.00598368	-0.130438	0.0261257	0.171722	0.366615	-0.017485	0.0310451	0.284335	0.070259	0.100417	0.0547105	-0.00588263	-0.0470866	0.0874639	0.0449583
ENSDARG00000075261	TIMP2B	TIMP metallopeptidase inhibitor 2b [Source:ZFIN;Acc:ZDB-GENE-040426-2655]	0.189392	0.101207	0.0801581	-0.0127937	0.0207383	0.293326	0.0666645	0.054443	-0.0196467	0.0701724	0.324099	0.0314789	0.00737851	-0.00347383	0.076532	-0.0366789
ENSDARG00000029445	EIF1B	zgc:56676 [Source:ZFIN;Acc:ZDB-GENE-040426-1109]	0.132775	-0.100763	-0.0330281	0.033358	-0.153996	0.0660639	0.0193109	0.146668	0.0639217	0.0701604	-0.0723235	0.0161807	-0.0453895	-0.0197214	0.0767795	-0.00110906
ENSDARG00000104124	ZNF1069	zinc finger protein 1069 [Source:ZFIN;Acc:ZDB-GENE-071004-89]	-0.00370516	0.176721	0.161023	-0.0333353	-0.0909597	0.00621155	0.208346	-0.194359	0.148273	0.0701563	0.0120735	0.0270625	0.0280853	-0.0298098	0.0220775	-0.108488
ENSDARG00000105428	SI:ZFOS-1837D3.1	si:zfos-1837d3.1 [Source:ZFIN;Acc:ZDB-GENE-030131-410]	0.145043	0.051464	0.0657635	0.067754	0.177917	0.103726	0.066552	0.122	0.118639	0.0701326	0.118407	0.113193	0.0721819	0.0451917	0.092701	0.0673331
ENSDARG00000068729	EIF2AK2	eukaryotic translation initiation factor 2-alpha kinase 2 [Source:ZFIN;Acc:ZDB-GENE-080422-1]	-0.230107	0.0526557	0.0600665	0.128949	0.0491309	-0.0852778	0.0603777	-0.129487	-0.25312	0.070129	0.0238027	-0.0582686	0.0208356	0.0224171	0.0189822	0.0703266
ENSDARG00000068782	SPG20A	spastic paraplegia 20a (Troyer syndrome) [Source:ZFIN;Acc:ZDB-GENE-080204-37]	-0.258932	-0.0369042	0.200289	-0.224374	0.184122	-0.061532	0.0940073	0.255959	-0.186914	0.0701184	-0.053693	-0.121102	0.0780556	-0.243443	-0.0759983	-0.0337761
ENSDARG00000053836	SI:CH211-284O19.8	si:ch211-284o19.8 [Source:ZFIN;Acc:ZDB-GENE-070912-289]	0.363411	-0.0294664	-0.0920607	0.0717777	-0.00150845	0.46472	-0.0016951	-0.0568564	-0.130192	0.0701142	0.180817	0.105448	0.272076	0.216168	0.00146934	0.223536
ENSDARG00000105562	SI:DKEY-23I12.7	si:dkey-23i12.7 [Source:ZFIN;Acc:ZDB-GENE-160728-52]	0.1742	0.0451295	0.239024	0.0833182	0.112155	0.296811	0.0228191	0.0908507	0.0828653	0.0699938	0.0728139	0.187471	-0.0934973	-0.0376553	0.170289	0.187997
ENSDARG00000102207	CABZ01102578.1	N/A	0.0961746	-0.193556	-0.0178864	-0.106181	-0.331146	0.426432	-0.0940092	-0.156188	-0.0602615	0.0697717	-0.0762642	-0.0215725	0.00327299	0.020213	0.0506555	-0.0593645
ENSDARG00000074390	TMEM176L.4	transmembrane protein 176l.4 [Source:ZFIN;Acc:ZDB-GENE-030131-3532]	0.177594	0.120465	0.153639	-0.0911067	0.0616921	0.0931865	0.0367624	-0.000402122	-0.178756	0.0695754	0.0625637	-0.0525221	0.0377641	-0.0172037	-0.0183422	0.0173103
ENSDARG00000069583	CNDP1	zgc:114181 [Source:ZFIN;Acc:ZDB-GENE-050913-105]	-0.0667431	-0.0892689	-0.00667187	-0.0151237	0.304763	0.187055	0.0295691	0.0845973	-0.074544	0.0695536	0.0775238	-0.0138843	0.0335244	-0.0493138	-0.111335	0.121177
ENSDARG00000096064	SI:DKEYP-100H4.4	si:dkeyp-100h4.4 [Source:ZFIN;Acc:ZDB-GENE-110914-147]	0.0796533	0.0370047	0.0598496	0.0469263	0.0237867	0.0158996	0.0934094	0.124216	-0.0211355	0.0692775	0.104156	0.121467	0.0907301	0.0536552	0.0255414	0.0126838
ENSDARG00000077260	SI:DKEY-28D5.13	si:dkey-28d5.13 [Source:ZFIN;Acc:ZDB-GENE-060503-636]	0.129295	0.172307	0.133284	0.0818131	0.0469999	0.0975798	0.240291	0.221863	0.192753	0.0692388	0.213004	0.147379	0.0917998	0.111444	0.0342052	0.0483981
ENSDARG00000058082	BIRC7	baculoviral IAP repeat containing 7 [Source:ZFIN;Acc:ZDB-GENE-070615-35]	-0.121	0.141993	0.2593	0.0621653	0.221498	-0.139138	0.258759	0.0604105	-0.0892556	0.0692051	0.0902404	0.094271	0.286653	0.0933245	0.00158629	0.0528248
ENSDARG00000060471	GCNT3	glucosaminyl (N-acetyl) transferase 3, mucin type [Source:ZFIN;Acc:ZDB-GENE-110411-253]	-0.00876313	-0.0335717	0.181377	0.00270098	0.0784586	-0.0988708	-0.014072	-0.0239343	-0.015249	0.0691135	-0.104318	-0.0610116	-0.0584006	-0.0997589	0.00105286	-0.0478168
ENSDARG00000041490	AFP4	antifreeze protein type IV [Source:ZFIN;Acc:ZDB-GENE-030131-5217]	0.119132	0.372122	0.0939065	-0.0378945	0.283002	0.0896124	0.193224	0.248119	0.443973	0.0689533	-0.10476	-0.0521291	-0.0932182	-0.097377	0.211024	0.0265998
ENSDARG00000103976	BX544877.1	N/A	0.0853168	0.0978467	0.0477357	0.102831	0.0676669	-0.0242146	0.0670178	-0.0104728	0.0190509	0.0688962	0.0650021	0.0179524	0.122568	0.111917	0.106529	-0.00197881
ENSDARG00000069216	C6AST1	six-cysteine containing astacin protease 1 [Source:ZFIN;Acc:ZDB-GENE-070621-1]	0.0221159	-0.0678762	0.122175	0.000387213	-0.0533881	-0.0814948	-0.0349885	0.047768	0.0238091	0.0687407	-0.0346168	0.0667697	0.0124786	0.069817	0.00785361	0.0841187
ENSDARG00000011975	FMN1	formin 1 [Source:ZFIN;Acc:ZDB-GENE-041001-198]	0.181403	-0.0158831	-0.055811	0.19404	0.0050063	0.179777	0.0161869	-0.174428	0.296093	0.0686593	0.0462107	-0.0347338	-0.0307132	0.283093	0.0719005	0.13366
ENSDARG00000102638	SI:RP71-7L19.2	si:rp71-7l19.2 [Source:ZFIN;Acc:ZDB-GENE-081103-31]	0.0268646	0.063771	0.153058	0.0144675	-0.0249249	0.0803892	0.0452189	-0.0678075	0.0555538	0.0686348	0.0193522	0.067457	0.15545	-0.0141077	0.0818775	-0.0386461
ENSDARG00000093945	VMA21	VMA21 vacuolar H+-ATPase homolog (S. cerevisiae) [Source:ZFIN;Acc:ZDB-GENE-081104-272]	-0.00368653	-0.0427278	0.0496004	0.09399	0.0313298	-0.0411934	0.0152835	-0.0621729	-0.103752	0.0686176	0.0820735	0.091801	0.0146034	0.125708	-0.0589863	0.0892795
ENSDARG00000091926	SI:DKEY-103E21.5	si:dkey-103e21.5 [Source:ZFIN;Acc:ZDB-GENE-060526-186]	0.0883233	0.0766729	0.088821	0.0434664	0.0860448	0.0052836	-0.00536081	0.087762	-0.0362717	0.0685859	0.0494797	0.0622299	0.0803757	0.00900913	0.0655757	0.0447591
ENSDARG00000097172	SI:DKEY-7I4.12	si:dkey-7i4.12 [Source:ZFIN;Acc:ZDB-GENE-131121-39]	0.0370469	0.0774143	-0.132045	-0.0349907	0.0106073	-0.266651	0.089082	0.105089	-0.228704	0.0683846	0.0587433	-0.0877828	0.106965	-0.0118063	0.123099	0.0012151
ENSDARG00000033955	CABZ01088025.1	N/A	-0.244457	-0.0154444	0.00924233	-0.300762	-0.373924	-0.31977	-0.287127	-0.161621	-0.34944	0.0683654	-0.280702	-0.224656	-0.201273	-0.138759	-0.148556	-0.319561
ENSDARG00000068255	NANOS3	nanos homolog 3 [Source:ZFIN;Acc:ZDB-GENE-011221-1]	-0.207811	0.0791687	-0.00786017	0.0574798	0.00220053	0.232368	0.0793956	0.188606	0.0592958	0.0682448	0.119415	0.0265595	0.155699	-0.0208495	0.0513263	-0.00601827
ENSDARG00000095257	ZNF1096	zinc finger protein 1096 [Source:ZFIN;Acc:ZDB-GENE-110913-108]	-0.112283	-0.0842225	-0.047504	0.0520642	-0.0375583	-0.0545344	-0.0885433	0.0804987	-0.0714869	0.0681986	-0.0364253	-0.14361	0.00458562	-0.0750266	0.0444958	-0.024357
ENSDARG00000030750	GABRR3B	gamma-aminobutyric acid (GABA) A receptor, rho 3b [Source:ZFIN;Acc:ZDB-GENE-131120-131]	-0.198092	-0.043997	0.0795094	0.029529	0.155676	-0.0995596	0.0931196	-0.0057066	-0.0796346	0.0679835	-0.134928	-0.0618521	0.0605977	0.0183065	0.165723	0.103758
ENSDARG00000098719	CABZ01084225.1	N/A	-0.00446024	0.0157368	0.134183	0.035996	0.0515855	-0.00823883	-0.0112497	0.0257699	0.0320675	0.0678361	0.0207771	0.0704544	-0.000920051	0.0250182	0.0118472	0.00584341
ENSDARG00000061222	UBA7	ubiquitin-like modifier activating enzyme 7 [Source:ZFIN;Acc:ZDB-GENE-121120-4]	0.260619	-0.0859775	-0.0502571	-0.112946	-0.0218677	0.289501	-0.0494036	-0.0525616	-0.0602701	0.06779	-0.157384	0.0380923	-0.0219239	-0.116588	-0.183136	0.0449243
ENSDARG00000004763	HHLA2A.2	HERV-H LTR-associating 2a, tandem duplicate 2 [Source:ZFIN;Acc:ZDB-GENE-091204-324]	0.233592	0.0425818	-0.0619996	0.0833835	-0.0413345	0.0832834	0.139327	0.0781837	0.04612	0.0677261	0.31286	-0.0643112	0.175915	0.162427	0.0217018	0.0583773
ENSDARG00000105461	SI:DKEY-11O1.6	si:dkey-11o1.6 [Source:ZFIN;Acc:ZDB-GENE-160113-34]	0.0153267	0.048225	0.0196883	0.0136087	0.057436	0.0224893	0.0556918	0.0395188	0.0333128	0.0677179	0.0662442	0.00248522	0.0926611	-0.00249127	0.00655194	0.125068
ENSDARG00000100995	ZGC:173615	zgc:173615 [Source:ZFIN;Acc:ZDB-GENE-080218-20]	0.0651486	0.0485004	0.0659858	0.082976	0.0328894	0.0392119	0.06536	0.0743785	0.0250228	0.0676837	0.12828	0.0286015	0.150562	0.100216	0.115366	0.11621
ENSDARG00000100188	RNPS1	RNA binding protein with serine rich domain 1 [Source:HGNC Symbol;Acc:HGNC:10080]	0.111466	-0.0677107	-0.0469081	-0.0599013	-0.0336537	0.207092	0.0185912	0.148406	0.145435	0.0676721	-0.0408246	-0.0152025	-0.141053	-0.138786	0.144125	-0.00807486
ENSDARG00000098472	CR936540.2	N/A	-0.00794429	0.0388056	0.16332	0.0627215	0.0788214	0.0764189	0.0922606	0.0121544	0.018371	0.0674779	0.0476348	0.0710678	0.0116093	0.0941763	0.000973878	0.151761
ENSDARG00000010555	PDHA1B	pyruvate dehydrogenase (lipoamide) alpha 1b [Source:ZFIN;Acc:ZDB-GENE-040718-96]	0.0745547	-0.0189643	0.0196315	0.0381292	-0.00161403	-0.0610178	0.0150128	-0.0137759	0.00165572	0.0673733	-0.0279479	0.0647064	0.0022786	-0.00846496	-0.0863523	0.0482098
ENSDARG00000103818	CU896644.1	N/A	0.0411603	-0.154648	0.10684	-0.0831109	-0.146858	0.00342297	-0.116675	0.0270544	-0.165127	0.0672682	0.0298395	-0.00212981	-0.0970704	0.151213	0.114717	-0.0672783
ENSDARG00000060303	SLC4A10B	solute carrier family 4, sodium bicarbonate transporter, member 10b [Source:ZFIN;Acc:ZDB-GENE-081105-62]	-0.244624	0.151946	0.159431	0.108315	0.341777	-0.177937	0.299052	-0.0673968	-0.184327	0.0672271	0.279878	0.0853377	0.2919	0.0656733	0.125614	0.0162298
ENSDARG00000103314	SI:DKEY-84H14.1	si:dkey-84h14.1 [Source:ZFIN;Acc:ZDB-GENE-110913-51]	0.0198643	0.0170587	-0.0129778	0.0533592	0.0627255	0.0674163	0.053444	0.067497	0.0387274	0.0670085	0.0832095	-0.0695087	-0.0026119	0.00441871	0.107874	-0.0233585
ENSDARG00000051939	PCXB	pyruvate carboxylase b [Source:ZFIN;Acc:ZDB-GENE-000831-1]	0.0965576	0.198341	0.140571	-0.277677	-0.0193583	0.142232	0.0807345	0.200298	0.142983	0.0669752	0.174944	0.0338448	0.0840732	-0.175725	0.109347	0.0327599
ENSDARG00000037266	MYOZ2B	myozenin 2b [Source:ZFIN;Acc:ZDB-GENE-040426-1853]	-0.0836838	0.0808386	0.113732	-0.239267	-0.0661736	-0.109651	-0.00818725	-0.0761287	-0.0530055	0.0668755	-0.201574	0.0282738	-0.0498776	0.051466	0.115111	-0.0915466
ENSDARG00000089362	GRN1	granulin 1 [Source:ZFIN;Acc:ZDB-GENE-060103-1]	0.0459028	0.0366842	0.0695929	0.118456	0.0368645	0.119417	0.0669954	0.0778353	0.100345	0.0668542	0.124378	0.0442221	0.135518	0.124586	0.0815431	0.093005
ENSDARG00000018637	SEC61G	Sec61 translocon gamma subunit [Source:ZFIN;Acc:ZDB-GENE-040718-203]	0.0906276	0.0815782	0.038766	0.128516	-0.0375254	0.155516	-0.0509437	0.000538751	0.065403	0.0667982	-0.0530508	0.164185	-0.187899	0.0887517	0.0380205	0.0594023
ENSDARG00000102853	SI:RP71-7L19.2	si:rp71-7l19.2 [Source:ZFIN;Acc:ZDB-GENE-081103-31]	-0.0729615	0.181138	0.0598835	0.0924804	0.0640144	-0.0332439	-0.0807336	-0.0580568	0.0766837	0.0667462	0.155579	-0.0181666	0.0411611	0.128989	0.0116481	-0.0104811
ENSDARG00000035596	ISCU	si:ch211-191d15.2 [Source:ZFIN;Acc:ZDB-GENE-040724-113]	-0.0059162	0.103584	-0.0567272	0.0888794	0.106154	0.0874351	-0.0732038	0.0657782	0.0280448	0.0666847	-0.0123199	0.0871106	-0.0693789	-0.0447046	-0.0452659	-0.00554384
ENSDARG00000088058	PIMR70	Pim proto-oncogene, serine/threonine kinase, related 70 [Source:ZFIN;Acc:ZDB-GENE-120215-28]	-0.000742381	0.0227565	0.0511304	0.0558104	0.0145078	0.151929	-0.0126944	0.0241256	-0.0307798	0.0663974	0.105586	0.0351467	0.0700225	-0.0260657	0.0618011	0.022157
ENSDARG00000051912	HPX	zgc:152945 [Source:ZFIN;Acc:ZDB-GENE-060929-800]	0.257171	0.170367	0.286342	0.140433	0.123859	0.193751	0.200119	0.226924	0.0949668	0.0663724	0.0306137	0.0402762	0.148684	0.0422999	0.123353	-0.0175313
ENSDARG00000056617	RPGRA	retinitis pigmentosa GTPase regulator a [Source:ZFIN;Acc:ZDB-GENE-070912-423]	-0.00820578	-0.0708681	0.0457628	0.0197521	0.0270153	0.00565373	-0.0237604	-0.062517	0.0353728	0.0663189	0.032	-0.00858002	0.0279472	0.0203683	0.0323279	0.0959599
ENSDARG00000086842	DAP1B	death associated protein 1b [Source:ZFIN;Acc:ZDB-GENE-000511-4]	0.0905695	-0.190693	0.0559856	0.0502599	0.0547382	0.0642121	-0.19562	-0.118572	0.150731	0.0662807	-0.198656	0.153615	-0.224659	0.05196	0.0295037	0.109867
ENSDARG00000097679	FTR88	finTRIM family, member 88 [Source:ZFIN;Acc:ZDB-GENE-131125-2]	0.0336402	0.0470455	0.0703916	0.0547514	0.02693	0.0285814	0.0382385	0.0551906	0.0547705	0.0660726	0.0208758	0.0899846	0.0541748	0.0295992	0.131897	0.0218366
ENSDARG00000037067	DNAJC22	DnaJ (Hsp40) homolog, subfamily C, member 22 [Source:ZFIN;Acc:ZDB-GENE-090313-196]	-0.0341616	0.0136834	0.112173	0.00783798	-0.00437515	-0.00101855	0.136418	-0.0558149	-0.00354289	0.0660266	-0.0412638	0.00971794	0.045725	0.153376	0.029698	0.0516389
ENSDARG00000033280	TPO	thyroid peroxidase [Source:HGNC Symbol;Acc:HGNC:12015]	0.011165	0.0160138	-0.0066116	-0.019255	0.0425642	0.0899352	-0.0332245	0.0403479	0.0476325	0.0657307	0.117361	0.030204	-0.0177333	-0.0278405	0.0631438	0.0276995
ENSDARG00000076252	SI:DKEY-247I3.1	si:dkey-247i3.1 [Source:ZFIN;Acc:ZDB-GENE-110913-84]	0.107225	0.0794241	0.0270227	0.0288483	0.0609033	0.0634793	0.138574	0.116155	0.0644457	0.0657227	0.0366568	0.01062	0.0298355	0.123932	0.0328852	0.0461135
ENSDARG00000104465	FAM196AB	family with sequence similarity 196, member Ab [Source:ZFIN;Acc:ZDB-GENE-120709-85]	0.00836421	0.0566557	0.0494415	0.0545653	0.122586	0.0646354	0.177113	0.0107195	0.00962949	0.065707	0.0249215	0.0431795	0.138693	0.138365	0.0805637	0.0173919
ENSDARG00000100870	CABZ01053748.1	N/A	-0.0489206	0.0279016	0.0690442	0.107483	-0.027647	0.0827014	0.103792	-0.0436044	0.0725798	0.0656318	0.075403	0.0250231	0.0137102	0.051758	-0.0309384	0.0734565
ENSDARG00000010680	GNGT2A	guanine nucleotide binding protein (G protein), gamma transducing activity polypeptide 2a [Source:ZFIN;Acc:ZDB-GENE-030131-7595]	-0.22636	-0.0381486	-0.0928337	-0.00802317	0.0129296	-0.0587957	-0.155398	0.0506373	-0.198657	0.065527	-0.321094	-0.0257156	-0.227346	-0.0697782	-0.00626801	-0.130153
ENSDARG00000031981	PCBD1	pterin-4 alpha-carbinolamine dehydratase/dimerization cofactor of hepatocyte nuclear factor 1 alpha [Source:ZFIN;Acc:ZDB-GENE-040426-1787]	-0.00286835	0.156949	0.0688641	-0.00106517	-0.00639188	0.228986	-0.0876271	0.109824	0.168733	0.0654891	-0.16214	0.143945	-0.169193	0.0911566	0.113183	0.013605
ENSDARG00000079930	SI:DKEYP-68B7.5	si:dkeyp-68b7.5 [Source:ZFIN;Acc:ZDB-GENE-070912-670]	0.00581682	0.0394508	0.00992372	0.00022956	0.20371	-0.0779204	0.184079	0.120888	0.0976727	0.0652854	0.163873	-0.0588653	0.13404	-0.0517548	-0.0139935	0.0483382
ENSDARG00000041232	RPS29	ribosomal protein S29 [Source:ZFIN;Acc:ZDB-GENE-040622-5]	0.06918	0.0853257	-0.146433	-0.168683	-0.0548935	0.118518	-0.0277737	0.0437947	0.264241	0.065081	-0.202699	0.0525647	-0.14562	-0.188487	0.101623	-0.173356
ENSDARG00000089922	DSN1	DSN1 homolog, MIS12 kinetochore complex component [Source:ZFIN;Acc:ZDB-GENE-170110-2]	0.11783	-0.0964202	0.104377	0.079787	0.110513	0.289552	0.0112433	0.0177424	0.0922292	0.0650376	0.254885	0.0372762	0.145464	0.167728	0.0680746	0.0977014
ENSDARG00000016704	PBLD	phenazine biosynthesis like protein domain containing [Source:ZFIN;Acc:ZDB-GENE-050522-217]	-0.243682	-0.189556	-0.144134	-0.22621	-0.105972	-0.0784421	-0.0957227	-0.0842245	-0.258549	0.0649469	-0.108948	-0.161524	-0.138114	-0.106986	-0.174853	-0.0569093
ENSDARG00000097752	SI:RP71-77L1.2	si:rp71-77l1.2 [Source:ZFIN;Acc:ZDB-GENE-131127-184]	-0.105277	-0.0760194	-0.00937259	-0.123412	0.0564757	-0.14553	0.0283666	-0.0902152	-0.115403	0.0647654	-0.0769222	-0.200359	-0.0241722	-0.0141077	0.0523976	-0.0736484
ENSDARG00000058105	RPL36A	ribosomal protein L36A [Source:ZFIN;Acc:ZDB-GENE-020423-1]	0.175641	0.132856	-0.128255	-0.0216831	-0.0129765	0.108527	-0.00672064	0.0922675	0.239053	0.0647505	-0.170967	0.0352005	-0.0491674	-0.067205	0.0307755	-0.0514464
ENSDARG00000055893	NMNAT1-RBP7A	nmnat1-rbp7a readthrough [Source:ZFIN;Acc:ZDB-GENE-160617-1]	-0.00937667	0.0584112	0.00185524	0.000931351	0.0633249	-0.0173058	0.0129279	0.0649548	-0.00141581	0.0647368	0.00671515	-0.0479329	0.0902645	-0.0191167	0.0578081	0.00859372
ENSDARG00000070386	KRTCAP2	keratinocyte associated protein 2 [Source:ZFIN;Acc:ZDB-GENE-060825-91]	0.0272767	0.0555313	0.18618	-0.002311	0.227688	0.224483	0.0156334	0.192502	0.259505	0.0645577	0.0239504	0.113187	-0.0314719	0.087091	0.183373	-0.0186795
ENSDARG00000080000	SLC25A1	si:dkey-178e17.1 [Source:ZFIN;Acc:ZDB-GENE-081104-41]	0.125832	0.0475312	-0.00362978	0.0289514	0.139394	0.0307748	0.0541965	0.00920754	0.103044	0.0644138	-0.0105219	0.172776	-0.0233651	-0.0198033	0.0723501	0.0273989
ENSDARG00000095102	SI:CH211-132G1.4	si:ch211-132g1.4 [Source:ZFIN;Acc:ZDB-GENE-090313-26]	0.0465234	0.140977	0.262577	-0.0213751	0.322812	-0.00531017	0.0523393	0.105012	-0.0452878	0.0644002	0.00429153	0.025728	-0.0494185	-0.0913857	-0.0199446	0.0396085
ENSDARG00000086272	SI:DKEY-4P15.5	si:dkey-4p15.5 [Source:ZFIN;Acc:ZDB-GENE-121214-193]	-0.543049	0.0663254	0.135702	-0.0831488	0.318679	-0.299553	0.16646	0.0577331	-0.139491	0.0643246	-0.14949	0.106157	-0.102029	-0.0670277	-0.272463	-0.0886093
ENSDARG00000075881	SI:CH211-39K3.2	si:ch211-39k3.2 [Source:ZFIN;Acc:ZDB-GENE-070705-180]	0.0711638	0.294033	-0.0212613	0.158076	0.142887	0.247054	0.0373253	0.122902	0.124221	0.0641697	0.11033	0.156214	0.290443	0.136236	0.012955	0.0455966
ENSDARG00000059054	PDK2B	pyruvate dehydrogenase kinase, isozyme 2b [Source:ZFIN;Acc:ZDB-GENE-040426-939]	-0.118519	0.330078	0.123974	0.0209269	0.107385	-0.0537228	0.19623	0.213062	0.0174522	0.0639699	0.05054	0.168473	0.112599	-0.0302956	0.0698908	0.0722105
ENSDARG00000056294	SBK1	si:ch211-183d21.3 [Source:ZFIN;Acc:ZDB-GENE-091118-114]	-0.293863	-0.0314158	0.0440547	0.0482672	0.153371	-0.145173	0.144406	0.094023	-0.0898731	0.0638638	0.0512215	0.0984898	-0.111147	0.00915491	-0.114675	0.0994139
ENSDARG00000063390	PVRL2L	poliovirus receptor-related 2 like [Source:ZFIN;Acc:ZDB-GENE-060503-249]	0.000524364	-0.0176814	0.149945	0.223176	0.235654	0.138172	0.0614565	-0.102932	0.0270485	0.0637043	0.192958	0.00265903	-0.0133403	0.132475	0.146841	0.165156
ENSDARG00000071891	PCDH2G6	protocadherin 2 gamma 6 [Source:ZFIN;Acc:ZDB-GENE-050610-28]	0.0341637	0.0311154	0.0565084	-0.0647603	0.119113	-0.0982388	0.25691	0.040428	-0.0210216	0.0636562	0.253035	0.144809	0.162055	0.0268008	0.00782309	-0.0243488
ENSDARG00000078847	SI:DKEY-238O13.4	si:dkey-238o13.4 [Source:ZFIN;Acc:ZDB-GENE-070705-403]	0.349534	-0.0591416	-0.0682225	0.0613884	0.0903037	0.131449	-0.109447	0.0523385	0.351563	0.0636261	0.142201	0.0805998	0.0204982	0.0428255	0.0498125	0.107719
ENSDARG00000074395	ZGC:174719	zgc:174719 [Source:ZFIN;Acc:ZDB-GENE-080213-13]	-0.0433399	0.064656	0.065469	0.0302267	0.0622946	-0.0313583	0.0719103	0.0153422	-0.0265262	0.0635679	0.041138	0.0900376	0.105419	0.00860063	0.137369	0.0160643
ENSDARG00000037334	WDR92	WD repeat domain 92 [Source:ZFIN;Acc:ZDB-GENE-050417-93]	0.3887	-0.00179195	-0.00233941	0.235516	0.0633087	0.420592	0.260219	0.0922735	0.183423	0.0634929	-0.0239898	0.505419	-0.055711	0.12921	0.284876	0.283428
ENSDARG00000002722	ANKRD2	ankyrin repeat domain 2 (stretch responsive muscle) [Source:ZFIN;Acc:ZDB-GENE-090313-383]	0.0109236	0.0212128	-0.105023	-0.0857576	-0.0962977	-0.0228678	0.0581115	-0.0396691	-0.0319749	0.0630558	0.00844965	-0.0590393	-0.077086	-0.0562339	-0.0218035	0.0157299
ENSDARG00000101071	SI:DKEYP-80D11.14	si:dkeyp-80d11.14 [Source:ZFIN;Acc:ZDB-GENE-110914-120]	0.0518941	0.0428007	0.0481386	0.0625055	0.0942822	0.0799296	0.0684193	0.0354028	0.0523078	0.0627482	0.0895718	0.026544	0.0228012	0.044487	0.0380009	0.0525853
ENSDARG00000092550	SI:DKEY-85A20.4	si:dkey-85a20.4 [Source:ZFIN;Acc:ZDB-GENE-090313-347]	0.10887	0.0728392	0.105133	0.102226	0.0713524	0.165671	0.10564	0.0226092	0.0193706	0.0627113	0.102368	0.101364	0.0959936	0.0245985	0.206662	0.082527
ENSDARG00000014805	FHL5	four and a half LIM domains 5 [Source:ZFIN;Acc:ZDB-GENE-040822-3]	0.0410449	0.0515506	0.0626315	-0.00663553	-0.0365869	0.0164745	0.0566738	0.0191575	0.0317847	0.0625418	0.0199034	0.0339639	0.0108769	-0.0204946	0.0734809	0.0496261
ENSDARG00000052700	SLC9B2	si:dkey-162b23.4 [Source:ZFIN;Acc:ZDB-GENE-110411-203]	-0.59801	-0.0333691	0.185153	0.116596	0.151203	-0.629675	0.134095	0.0176977	-0.618414	0.0623966	-0.0335479	0.0452504	-0.0291924	-0.0963251	-0.119261	0.0563892
ENSDARG00000096992	ZGC:153405	zgc:153405 [Source:ZFIN;Acc:ZDB-GENE-060825-170]	0.0109788	0.0154809	0.0420094	0.0396452	0.0278059	-0.0100859	0.0523164	0.0433974	0.052179	0.0623737	0.0182756	0.0163807	-0.0127172	0.00427545	0.0101424	-0.0383821
ENSDARG00000040290	PON3.2	paraoxonase 3, tandem duplicate 2 [Source:ZFIN;Acc:ZDB-GENE-071004-70]	-0.0682414	-0.0622143	0.115848	-0.109689	0.14969	0.0601937	0.132805	0.238094	-0.0354963	0.0623699	0.0484829	0.0212607	-0.0978098	-0.173576	0.106243	-0.0724555
ENSDARG00000043002	VMO1A	vitelline membrane outer layer 1 homolog a [Source:ZFIN;Acc:ZDB-GENE-131121-600]	0.0331592	0.0828646	0.0684132	0.0250789	0.102026	-0.0222818	0.096257	0.0825155	0.0700176	0.062347	0.0728646	0.097459	0.101596	0.0489633	0.0668348	0.0461718
ENSDARG00000096950	BX927244.1	N/A	-0.0833059	0.0749821	-0.000424063	0.0235791	-0.157672	-0.0858788	0.00888701	-0.0654534	-0.122627	0.062307	-0.19343	0.0683366	0.0138729	0.0767512	0.0940439	-0.089145
ENSDARG00000098529	CCNE2	cyclin E2 [Source:ZFIN;Acc:ZDB-GENE-030131-9689]	0.307019	-0.0539165	-0.0278575	-0.0124258	-0.0314684	0.102174	-0.232463	-0.181411	0.356982	0.0622998	0.0800466	0.0809992	0.018441	0.251217	-0.0599516	0.00789231
ENSDARG00000056934	HEPACAMA	hepatic and glial cell adhesion molecule a [Source:ZFIN;Acc:ZDB-GENE-050522-198]	-0.207083	0.029545	0.113669	-0.233173	-0.019685	-0.268044	0.099026	0.0611125	-0.146359	0.0622841	-0.0862132	0.0520423	0.0235774	0.00729254	0.106317	-0.0627092
ENSDARG00000077898	WU:FJ20B03	wu:fj20b03 [Source:ZFIN;Acc:ZDB-GENE-030131-7475]	0.0219775	0.0319887	0.0569054	0.0949152	0.0363282	0.00365725	0.0668583	0.0503041	0.0595307	0.0621689	0.098789	0.0612897	0.0314708	0.050951	-0.00288791	0.0134087
ENSDARG00000105675	BX005417.4	N/A	0.0664551	0.186344	0.187725	-0.00977654	0.00328941	-0.0278275	0.0176982	0.102109	-0.00155981	0.062167	0.140714	0.0349035	0.138236	0.118242	0.0200597	0.0454581
ENSDARG00000045269	PTS	6-pyruvoyltetrahydropterin synthase [Source:ZFIN;Acc:ZDB-GENE-070615-3]	0.328445	0.10335	0.208896	0.123596	0.116452	0.109258	0.09706	0.0313517	-0.0129193	0.0619138	0.139192	0.0134784	0.205421	0.188572	-0.0911319	0.0974315
ENSDARG00000097901	SI:CH73-90P23.1	si:ch73-90p23.1 [Source:ZFIN;Acc:ZDB-GENE-131121-421]	0.191699	0.0662969	0.096992	0.0522832	0.0876652	0.176289	0.0703684	0.0809255	0.0730874	0.061798	0.220175	0.031713	0.0984144	0.142683	0.0197365	0.18957
ENSDARG00000104826	PCDH1GC5	protocadherin 1 gamma c 5 [Source:ZFIN;Acc:ZDB-GENE-041118-16]	-0.373877	0.0258178	0.156272	0.128633	0.125155	0.00910776	0.192971	0.212408	-0.312809	0.0617848	0.239977	0.0497323	0.199077	0.159844	-0.082486	0.0866318
ENSDARG00000034604	APOBEC2B	apolipoprotein B mRNA editing enzyme, catalytic polypeptide-like 2b [Source:ZFIN;Acc:ZDB-GENE-090618-1]	0.00120769	0.0634401	0.016661	0.00649295	0.0376122	-0.010767	-0.00621321	0.0137944	0.000180208	0.061297	0.0031489	0.0323376	0.0157262	0.0714113	0.0411326	0.115684
ENSDARG00000015592	C1QL2	complement component 1, q subcomponent-like 2 [Source:ZFIN;Acc:ZDB-GENE-081105-160]	0.0798899	0.0640926	0.153251	0.0257834	0.0773082	0.0690814	0.137435	0.122652	0.092185	0.0612858	0.0353077	0.0793056	0.0962615	0.0842494	0.0438838	0.197259
ENSDARG00000100370	CT955963.1	N/A	-0.0151605	-0.0834079	-0.0158331	-0.00689788	0.00167526	0.02439	-0.0765212	-0.0146544	-0.0378029	0.0611624	-0.0264205	-0.0627929	0.0243252	-0.00917575	0.0362105	-0.0281153
ENSDARG00000102870	SI:DKEYP-123A12.2	si:dkeyp-123a12.2 [Source:ZFIN;Acc:ZDB-GENE-041210-271]	-0.0568844	0.0569296	0.1804	-0.018954	0.0674624	-0.0210346	0.031537	0.118404	-0.0128351	0.0611045	0.0984595	-0.000899386	-0.0477138	0.0790494	-0.0953309	-0.0309228
ENSDARG00000003216	ANXA2A	annexin A2a [Source:ZFIN;Acc:ZDB-GENE-030131-4282]	0.141938	-0.0427089	-0.623861	-0.026188	-0.155332	0.12483	-0.277697	-0.151566	-0.081693	0.0608807	0.0498175	-0.0104913	-0.0655997	-0.124824	-0.0416767	-0.00267464
ENSDARG00000099599	PIGRL2.3	polymeric immunoglobulin receptor-like 2.3 [Source:ZFIN;Acc:ZDB-GENE-150409-2]	-0.058525	-0.0180046	0.0355386	-0.0275135	0.0386567	0.0881887	0.0561925	0.0691897	0.0444724	0.0608151	-0.0253871	-0.0623273	-0.0671824	-0.00192933	0.0231211	0.0589912
ENSDARG00000100644	BX005284.1	N/A	0.0044336	0.0754676	0.020762	0.0275847	0.0629325	0.0364995	-0.0264604	-0.0792176	-0.00878197	0.0606985	0.0830175	0.022491	-0.0174968	0.0257537	0.0305022	0.0663108
ENSDARG00000104129	SI:DKEY-23N7.10	si:dkey-23n7.10 [Source:ZFIN;Acc:ZDB-GENE-141222-64]	-0.0256158	-0.00710491	0.0696329	-0.00774628	0.0094044	0.0302131	0.2784	0.0514868	-0.0488613	0.0606672	-0.0868673	-0.0483596	0.191763	0.117931	0.137488	-0.0370379
ENSDARG00000100417	CT978957.1	N/A	-0.0433706	-0.0724233	0.0495178	-0.11932	-0.0682803	0.1682	-0.078245	-0.0859958	0.0465999	0.0606582	0.0069885	0.0193689	-0.0603852	-0.0358217	0.036936	-0.0925686
ENSDARG00000075909	SLC35F3A	solute carrier family 35, member F3a [Source:ZFIN;Acc:ZDB-GENE-080204-20]	0.111663	0.0793365	0.194203	0.0444006	-9.11e-05	0.0543929	0.0932954	0.0515291	0.0335844	0.0606522	0.0598738	0.0608457	0.0561165	0.0552514	0.0369459	0.0142805
ENSDARG00000108060	CABZ01024885.1	N/A	-0.0562955	-0.0698745	0.117255	0.064566	0.299102	-0.242278	0.123134	0.127096	-0.0887473	0.0606286	-0.0797199	0.0456994	-0.079951	-0.0159001	-0.12208	0.025195
ENSDARG00000090840	ZNF980	zinc finger protein 980 [Source:ZFIN;Acc:ZDB-GENE-110913-163]	-0.125879	-0.432799	-0.220707	-0.103553	-0.259296	-0.253788	-0.409284	-0.238434	0.109563	0.0605747	-0.162868	-0.200667	-0.208599	-0.0463107	-0.247417	-0.310001
ENSDARG00000102575	SI:CH211-106J21.2	si:ch211-106j21.2 [Source:ZFIN;Acc:ZDB-GENE-081103-42]	-0.0556091	0.0666603	-0.0455879	-0.00521464	0.0777253	-0.106649	-0.0612539	0.0729315	-0.0545332	0.0605473	0.0220999	-0.075253	0.0149764	0.0479415	0.0867319	-0.0310259
ENSDARG00000070299	BX942819.1	N/A	-0.0103828	0.0325142	0.0543617	-0.002055	0.0356596	0.00725469	0.00608043	0.0109193	0.0205035	0.0605366	0.00983146	0.0248724	0.0427605	0.0198423	0.0448763	-0.0123331
ENSDARG00000105176	FO704618.1	N/A	0.0486476	-0.175456	-0.0422378	-0.0888875	-0.148589	-0.297224	0.0307671	-0.217033	-0.0524924	0.0604345	-0.0474357	0.0762034	-0.0757322	-0.168446	-0.0985713	-0.190161
ENSDARG00000068179	TRIB2	tribbles pseudokinase 2 [Source:ZFIN;Acc:ZDB-GENE-091207-3]	-0.165224	-0.065291	0.0926981	-0.0611542	0.131918	-0.0181702	0.134525	0.175129	-0.123797	0.0603826	0.18552	-0.0777519	-0.068669	-0.0931098	0.0312267	-0.027154
ENSDARG00000092331	PIMR136	Pim proto-oncogene, serine/threonine kinase, related 136 [Source:ZFIN;Acc:ZDB-GENE-041014-308]	0.0323434	0.0606759	0.0254397	0.0433088	0.175496	-0.0203664	0.0613298	0.0458654	0.173061	0.0603304	0.102426	0.0867064	0.125972	0.145426	0.128045	0.0251621
ENSDARG00000030844	KLF11A	Kruppel-like factor 11a [Source:ZFIN;Acc:ZDB-GENE-030131-3568]	-0.306424	-0.0097443	0.267879	-0.274303	-0.0314276	-0.424962	0.134299	0.105643	0.0190648	0.0603072	-0.262148	0.0751598	-0.0775145	0.189443	-0.174457	-0.114634
ENSDARG00000015890	MAFA	v-maf avian musculoaponeurotic fibrosarcoma oncogene homolog a (paralog a) [Source:ZFIN;Acc:ZDB-GENE-010605-2]	0.00626918	0.000888119	0.0670276	0.0858391	0.130545	0.187204	0.135145	0.153189	-0.00755251	0.0603051	0.0263965	0.114286	-0.00937755	0.0545716	-0.028228	0.0949267
ENSDARG00000100251	SI:CH211-152C8.2	si:ch211-152c8.2 [Source:ZFIN;Acc:ZDB-GENE-091204-383]	0.0333357	0.00798559	0.136702	0.0189258	0.00485509	-0.0165471	-0.0159769	-0.0487735	0.0635314	0.0602293	0.0846703	0.00305388	0.0458946	-0.00998266	-0.0366891	-0.00283849
ENSDARG00000045164	NPTX2B	neuronal pentraxin IIb [Source:ZFIN;Acc:ZDB-GENE-110328-1]	-0.0797491	-0.0634447	-0.0169304	-0.0534122	0.0497996	-0.0467376	-0.0372557	-0.134	-0.112155	0.0601076	-0.0111748	-0.0211324	-0.122535	0.0197405	-0.0463145	-0.052719
ENSDARG00000102533	SI:CH73-281I18.4	si:ch73-281i18.4 [Source:ZFIN;Acc:ZDB-GENE-141222-81]	-0.00354491	-0.0673066	0.0982783	0.086716	0.108452	-0.0218407	0.0650366	-0.000952223	-0.00215671	0.0600981	0.118687	-0.0157406	0.0842832	-0.0413121	-0.0866044	0.164112
ENSDARG00000103466	CCL35.1	chemokine (C-C motif) ligand 35, duplicate 1 [Source:ZFIN;Acc:ZDB-GENE-081022-33]	0.0185201	0.0101511	0.0293551	0.0106482	0.0100665	-0.00123197	0.0165785	0.0186621	-0.00962505	0.0600873	0.0128377	0.13872	0.0260518	0.0229179	-0.0019203	0.0683645
ENSDARG00000104659	CABZ01109604.1	N/A	0.110127	-0.0486289	-0.0851466	0.0360244	-0.0266813	0.269936	-0.0589703	0.104124	0.243319	0.0600846	-0.169762	0.111151	-0.0353128	0.180187	0.104789	0.238994
ENSDARG00000104425	P2RY2.3	purinergic receptor P2Y, G-protein coupled, 2, tandem duplicate 3 [Source:ZFIN;Acc:ZDB-GENE-091204-458]	0.0590361	0.0618608	0.00885941	0.0488968	0.00706051	0.0191915	0.105613	0.0361295	0.0617829	0.0600722	0.00619445	0.11279	0.0227205	0.0980908	0.0578486	0.0113653
ENSDARG00000094021	BX649641.6	N/A	0.0276751	0.0894372	0.101392	0.0893103	0.0385084	0.082261	0.0804571	0.029349	0.176163	0.0599387	0.032034	-0.0765036	0.0741791	0.154283	0.0589628	0.0461075
ENSDARG00000038159	TCF7L1A	transcription factor 7-like 1a (T-cell specific, HMG-box) [Source:ZFIN;Acc:ZDB-GENE-980605-30]	0.238442	0.171409	0.0975058	-0.0426216	-0.131557	0.148871	0.0149933	0.142962	0.243618	0.0599382	-0.0355551	0.0560032	0.108468	0.0868187	0.176866	-0.0057681
ENSDARG00000071565	HNF4G	hepatocyte nuclear factor 4, gamma [Source:ZFIN;Acc:ZDB-GENE-060929-100]	-0.406818	-0.0682903	-0.0425628	-0.159524	-0.113433	-0.0975589	-0.0178728	-0.00324273	-0.239339	0.0595859	-0.0781769	-0.21012	0.00802274	-0.249079	-0.28738	-0.136885
ENSDARG00000101356	CABZ01044157.1	N/A	0.0706821	-0.0939073	0.0944349	-0.0159156	-0.0728968	0.125812	0.022878	0.00900981	-0.0406454	0.0595612	0.132295	-0.0266522	0.0376127	0.12395	0.0680698	0.114479
ENSDARG00000069953	KCNQ5B	potassium voltage-gated channel, KQT-like subfamily, member 5b [Source:ZFIN;Acc:ZDB-GENE-090312-178]	-0.153668	0.139874	-0.0109874	-0.18985	-0.0749711	-0.0831817	0.164361	0.0320299	-0.20795	0.059553	0.13022	0.0186859	0.288378	0.02687	0.0102749	0.0556135
ENSDARG00000091906	RBP7A	retinol binding protein 7a, cellular [Source:ZFIN;Acc:ZDB-GENE-071004-2]	0.0925513	0.12464	0.192159	0.0746108	0.129961	0.0374483	0.196256	0.112559	0.0339618	0.0595478	0.143899	0.0234588	0.0348145	0.0185041	0.036091	0.037849
ENSDARG00000027391	CCND3	cyclin D3 [Source:ZFIN;Acc:ZDB-GENE-041010-110]	0.12624	0.052642	0.0682733	0.0753497	0.0696015	0.0584718	0.0762005	0.0507119	0.0688784	0.0595379	0.0479453	0.0280281	0.0302207	0.0323695	0.0419844	0.143648
ENSDARG00000068283	CYP2X10.2	cytochrome P450, family 2, subfamily X, polypeptide 10.2 [Source:ZFIN;Acc:ZDB-GENE-060818-12]	0.0376596	-0.0735657	0.0661025	0.129594	0.00450662	0.063754	0.0231891	-0.0140666	0.0191062	0.0594789	-0.0626058	-0.0503913	-0.0937179	-0.0375538	0.124268	-0.0981666
ENSDARG00000096467	SI:CH211-246N15.2	si:ch211-246n15.2 [Source:ZFIN;Acc:ZDB-GENE-120703-24]	0.142988	0.0335391	0.216663	0.138555	0.118357	0.0213056	0.00922256	0.0598674	0.174453	0.0593037	0.173593	0.0555858	0.137302	0.187543	0.0883954	0.182788
ENSDARG00000075058	GABRA6A	gamma-aminobutyric acid (GABA) A receptor, alpha 6a [Source:ZFIN;Acc:ZDB-GENE-040426-1692]	-0.011895	-0.0454229	0.0295332	-0.014732	-0.0737331	-0.0909666	-0.0312242	-0.0731561	-0.0638611	0.0592419	-0.0376825	0.067549	0.00604247	-0.010874	0.0171984	-0.0246975
ENSDARG00000038271	ZGC:113293	zgc:113293 [Source:ZFIN;Acc:ZDB-GENE-050417-453]	-0.0309384	0.00614868	0.0754407	0.0254473	0.115453	0.123887	0.0179803	0.0865392	0.0549034	0.0592002	0.0697979	-0.0245615	-0.00051058	0.00994806	0.0518739	0.0657497
ENSDARG00000055746	SI:CH211-238G23.1	si:ch211-238g23.1 [Source:ZFIN;Acc:ZDB-GENE-050420-173]	0.0246498	0.248191	0.0775285	-0.0138363	0.0677002	0.0723337	0.147061	0.0899017	0.0996663	0.059017	0.110666	0.150867	0.0456606	0.0222787	0.187545	0.0764624
ENSDARG00000007971	CKS1B	CDC28 protein kinase regulatory subunit 1B [Source:ZFIN;Acc:ZDB-GENE-040801-112]	0.179249	0.0218219	0.0141749	0.211776	-0.00808308	0.1932	-0.208663	-0.0566962	0.128455	0.0589202	0.0620185	0.0104634	-0.0280888	0.172962	-0.0331989	0.102479
ENSDARG00000100539	BTR22	bloodthirsty-related gene family, member 22 [Source:ZFIN;Acc:ZDB-GENE-080402-4]	0.0650342	0.12896	-0.00977211	0.0457194	-0.0555588	0.0706148	0.0302371	0.0361527	0.044718	0.0587544	0.0477711	0.0587495	-0.0281931	-0.00961834	0.0353545	-0.02136
ENSDARG00000077688	CPO	carboxypeptidase O [Source:ZFIN;Acc:ZDB-GENE-070619-6]	0.00765417	0.239241	0.0628598	0.019088	0.0405042	0.0207864	0.0448781	0.0322693	0.0209104	0.0586113	0.043636	0.0367435	0.0645455	0.0226384	0.0144309	0.0529786
ENSDARG00000063731	RBM45	RNA binding motif protein 45 [Source:ZFIN;Acc:ZDB-GENE-070122-4]	-0.0891137	-0.178239	-0.130911	-0.0191746	0.0378987	0.104949	0.0228874	0.0552591	0.15763	0.0585065	0.0421939	-0.0571277	-0.174339	-0.237216	0.0238997	-0.076831
ENSDARG00000102772	KLHDC3	kelch domain containing 3 [Source:ZFIN;Acc:ZDB-GENE-040426-2426]	0.0657567	0.00112475	-0.136396	-0.00392918	0.324485	0.0808671	-0.00410809	0.0851049	0.0690657	0.0584924	0.199482	-0.0443233	0.0683568	0.0746611	0.0594813	0.189957
ENSDARG00000104275	DICP1.17	diverse immunoglobulin domain-containing protein 1.17 [Source:ZFIN;Acc:ZDB-GENE-120306-10]	0.0255828	0.0312571	0.050485	0.0740461	0.0180216	0.017832	-0.0108665	0.130938	0.0804719	0.0584064	-0.0119849	0.0301449	0.134156	0.183572	0.0524137	0.0293656
ENSDARG00000087757	PIMR190	Pim proto-oncogene, serine/threonine kinase, related 190 [Source:ZFIN;Acc:ZDB-GENE-131119-2]	0.0336198	0.0622194	0.0401374	0.0131899	0.026873	0.053278	0.056222	0.063157	0.0424684	0.0583519	0.0467559	0.0574541	0.044287	0.0828076	0.0353776	0.0398434
[truncated: 3,559 more rows]

## Sheet: Table S4
PAH	Differentially Expressed Gene (DEG) Symbol	Number of PAHs the DEG is common to
[truncated: 640 more rows]
