# Supplementary material for: Coupling Genome-wide Transcriptomics and Developmental Toxicity Profiles in Zebrafish to Characterize Polycyclic Aromatic Hydrocarbon (PAH) Hazard
Source: Int J Mol Sci. 2019 May 25;20(10):2570. doi: 10.3390/ijms20102570 (PMC6566387; doi:10.3390/ijms20102570)
Supplement: Supplementary file 1 [file ijms-20-02570-s001.zip › Supplement file 2.xlsx]

## Sheet: 4H_CPdefP
p-value	T	Q	Q&T	Q&T/Q	Q&T/T	term ID	t type	t group	t name	t depth	Q&T list
0.041	24	13	3	0.231	0.125	HP:0007722	hp	3	Retinal pigment epithelial atrophy	1	ENSDARG00000027236,ENSDARG00000034007,ENSDARG00000062661
0.0245	62	13	4	0.308	0.065	HP:0000608	hp	2	Macular degeneration	1	ENSDARG00000027236,ENSDARG00000034007,ENSDARG00000062661,ENSDARG00000076055
0.0382	246	13	6	0.462	0.024	HP:0000613	hp	1	Photophobia	1	ENSDARG00000004358,ENSDARG00000023082,ENSDARG00000034007,ENSDARG00000036840,ENSDARG00000062661,ENSDARG00000076055
ENSEMBL ID	GeneSymbol	Description
ENSDARG00000001721	OC90	otoconin 90 [Source:ZFIN;Acc:ZDB-GENE-070912-300]
ENSDARG00000001910	RORAB	RAR-related orphan receptor A, paralog b [Source:ZFIN;Acc:ZDB-GENE-040426-855]
ENSDARG00000004358	GNB3A	guanine nucleotide binding protein (G protein), beta polypeptide 3a [Source:ZFIN;Acc:ZDB-GENE-040718-134]
ENSDARG00000004748	ZGC:100868	zgc:100868 [Source:ZFIN;Acc:ZDB-GENE-040801-33]
ENSDARG00000004753	MYLKB	myosin light chain kinase b [Source:ZFIN;Acc:ZDB-GENE-041111-150]
ENSDARG00000006467	PCDH8	protocadherin 8 [Source:ZFIN;Acc:ZDB-GENE-980526-242]
ENSDARG00000007024	UOX	urate oxidase [Source:ZFIN;Acc:ZDB-GENE-030826-24]
ENSDARG00000008263	MFSD4AB	major facilitator superfamily domain containing 4Ab [Source:ZFIN;Acc:ZDB-GENE-060810-38]
ENSDARG00000011640	SYT5B	synaptotagmin Vb [Source:ZFIN;Acc:ZDB-GENE-050522-134]
ENSDARG00000012126	ZGC:109965	zgc:109965 [Source:ZFIN;Acc:ZDB-GENE-050913-21]
ENSDARG00000014233	SEPT8B	septin 8b [Source:ZFIN;Acc:ZDB-GENE-070424-3]
ENSDARG00000019902	RCVRN2	recoverin 2 [Source:ZFIN;Acc:ZDB-GENE-030131-7590]
ENSDARG00000021787	ABCB5	ATP-binding cassette, sub-family B (MDR/TAP), member 5 [Source:ZFIN;Acc:ZDB-GENE-030131-6414]
ENSDARG00000023082	KRT1-19D	keratin, type 1, gene 19d [Source:ZFIN;Acc:ZDB-GENE-060316-1]
ENSDARG00000027236	RS1A	retinoschisin 1a [Source:ZFIN;Acc:ZDB-GENE-040801-171]
ENSDARG00000033832	AMPD1	adenosine monophosphate deaminase 1 (isoform M) [Source:ZFIN;Acc:ZDB-GENE-040426-1906]
ENSDARG00000034007	PROM1B	prominin 1 b [Source:ZFIN;Acc:ZDB-GENE-031003-1]
ENSDARG00000036840	KRT15	keratin 15 [Source:ZFIN;Acc:ZDB-GENE-040426-2931]
ENSDARG00000037588	BHLHE23	basic helix-loop-helix family, member e23 [Source:ZFIN;Acc:ZDB-GENE-050913-22]
ENSDARG00000037921	GNG13B	guanine nucleotide binding protein (G protein), gamma 13b [Source:ZFIN;Acc:ZDB-GENE-040718-97]
ENSDARG00000040252	ATP1A1A.5	ATPase, Na+/K+ transporting, alpha 1a polypeptide, tandem duplicate 5 [Source:ZFIN;Acc:ZDB-GENE-020501-1]
ENSDARG00000040466	VIL1	villin 1 [Source:ZFIN;Acc:ZDB-GENE-040426-799]
ENSDARG00000041382	SI:DKEY-283B15.2	si:dkey-283b15.2 [Source:ZFIN;Acc:ZDB-GENE-100921-93]
ENSDARG00000041433	SI:DKEY-7C18.24	si:dkey-7c18.24 [Source:ZFIN;Acc:ZDB-GENE-041014-63]
ENSDARG00000042872	ZDHHC8A	zinc finger, DHHC-type containing 8a [Source:ZFIN;Acc:ZDB-GENE-091118-26]
ENSDARG00000044441	MYO7B	si:ch73-194h10.2 [Source:ZFIN;Acc:ZDB-GENE-100921-21]
ENSDARG00000052099	AGXTA	alanine-glyoxylate aminotransferase a [Source:ZFIN;Acc:ZDB-GENE-040718-16]
ENSDARG00000052575	ARL13A	ADP-ribosylation factor-like 13A [Source:ZFIN;Acc:ZDB-GENE-040426-1790]
ENSDARG00000052700	SLC9B2	si:dkey-162b23.4 [Source:ZFIN;Acc:ZDB-GENE-110411-203]
ENSDARG00000054797	RDH13	zgc:153441 [Source:ZFIN;Acc:ZDB-GENE-060825-39]
ENSDARG00000055190	SLC17A5	solute carrier family 17 (acidic sugar transporter), member 5 [Source:ZFIN;Acc:ZDB-GENE-060929-1158]
ENSDARG00000055253	SLC12A10.3	slc12a10.3 solute carrier family 12 (sodium/potassium/chloride transporters), member 10, tandem duplicate 3 [Source:ZFIN;Acc:ZDB-GENE-060503-518]
ENSDARG00000056036	STXBP1B	syntaxin binding protein 1b [Source:ZFIN;Acc:ZDB-GENE-060531-166]
ENSDARG00000062661	ABCA4B	ATP-binding cassette, sub-family A (ABC1), member 4b [Source:ZFIN;Acc:ZDB-GENE-050517-4]
ENSDARG00000069615	CKMT2A	creatine kinase, mitochondrial 2a (sarcomeric) [Source:ZFIN;Acc:ZDB-GENE-030131-5717]
ENSDARG00000071341	ABCH1	ATP-binding cassette, sub-family H, member 1 [Source:ZFIN;Acc:ZDB-GENE-050517-42]
ENSDARG00000076055	RPGRIP1	retinitis pigmentosa GTPase regulator interacting protein 1 [Source:ZFIN;Acc:ZDB-GENE-091204-394]
ENSDARG00000078052	EMILIN3A	elastin microfibril interfacer 3a [Source:ZFIN;Acc:ZDB-GENE-080612-2]
ENSDARG00000078440	CCDC88AA	coiled-coil domain containing 88Aa [Source:ZFIN;Acc:ZDB-GENE-100701-2]
ENSDARG00000078557	SI:CH211-57N23.4	si:ch211-57n23.4 [Source:ZFIN;Acc:ZDB-GENE-140106-153]
ENSDARG00000092269	SI:DKEYP-41F9.4	si:dkeyp-41f9.4 [Source:ZFIN;Acc:ZDB-GENE-091204-320]
ENSDARG00000094559	ZGC:174855	zgc:174855 [Source:ZFIN;Acc:ZDB-GENE-071004-74]
ENSDARG00000096313	BX537277.4	N/A
ENSDARG00000097613	IGFN1.3	immunoglobulin-like and fibronectin type III domain containing 1, tandem duplicate 3 [Source:ZFIN;Acc:ZDB-GENE-131122-44]
ENSDARG00000098392	SI:CH73-28H20.1	si:ch73-28h20.1 [Source:ZFIN;Acc:ZDB-GENE-141216-463]
ENSDARG00000099008	EGFLAM	EGF like, fibronectin type III and laminin G domains [Source:HGNC Symbol;Acc:HGNC:26810]
ENSDARG00000102393	ARL3L1	ADP-ribosylation factor-like 3, like 1 [Source:ZFIN;Acc:ZDB-GENE-040426-1649]
ENSDARG00000102430	OPN6A	opsin 6, group member a [Source:ZFIN;Acc:ZDB-GENE-061201-30]
ENSDARG00000103413	ZGC:109949	zgc:109949 [Source:ZFIN;Acc:ZDB-GENE-050522-166]
ENSDARG00000104502	SI:DKEY-264F17.5	si:dkey-264f17.5 [Source:ZFIN;Acc:ZDB-GENE-120703-23]
ENSDARG00000104687	SLC16A9B	solute carrier family 16, member 9b [Source:ZFIN;Acc:ZDB-GENE-040801-69]

## Sheet: Retene
p-value	T	Q	Q&T	Q&T/Q	Q&T/T	term ID	t type	t group	t name	t depth	Q&T list
7.54e-12	37	77	9	0.117	0.243	GO:0071466	BP	1	cellular response to xenobiotic stimulus	3	ENSDARG00000006220,ENSDARG00000021833,ENSDARG00000052618,ENSDARG00000061841,ENSDARG00000068934,ENSDARG00000086826,ENSDARG00000098315,ENSDARG00000098589,ENSDARG00000104068
0.00151	840	77	14	0.182	0.017	GO:0070887	BP	1	cellular response to chemical stimulus	2	ENSDARG00000006220,ENSDARG00000021833,ENSDARG00000052618,ENSDARG00000055186,ENSDARG00000057633,ENSDARG00000059387,ENSDARG00000061841,ENSDARG00000068934,ENSDARG00000086826,ENSDARG00000089697,ENSDARG00000098315,ENSDARG00000098589,ENSDARG00000104068,ENSDARG00000104474
0.00131	150	77	7	0.091	0.047	GO:0020037	MF	3	heme binding	2	ENSDARG00000031952,ENSDARG00000068934,ENSDARG00000098315,ENSDARG00000098589,ENSDARG00000101195,ENSDARG00000101789,ENSDARG00000103456
0.000189	68	77	6	0.078	0.088	GO:0009636	BP	1	response to toxic substance	2	ENSDARG00000019236,ENSDARG00000021787,ENSDARG00000021833,ENSDARG00000032496,ENSDARG00000033364,ENSDARG00000058734
9.67e-15	47	77	11	0.143	0.234	GO:0009410	BP	1	response to xenobiotic stimulus	2	ENSDARG00000006220,ENSDARG00000021833,ENSDARG00000030896,ENSDARG00000052618,ENSDARG00000061841,ENSDARG00000068934,ENSDARG00000086826,ENSDARG00000098315,ENSDARG00000098589,ENSDARG00000099702,ENSDARG00000104068
0.00191	9	14	3	0.214	0.333	HP:0040284	hp	22	Very rare	2	ENSDARG00000006220,ENSDARG00000089507,ENSDARG00000097491
0.0499	3	77	2	0.026	0.667	GO:0070330	MF	8	aromatase activity	1	ENSDARG00000068934,ENSDARG00000098315
0.0167	2	77	2	0.026	1	GO:0034813	MF	16	benzo(a)pyrene 7,8-dioxygenase activity	1	ENSDARG00000101195,ENSDARG00000101789
0.0167	2	77	2	0.026	1	GO:0034811	MF	9	benzo(a)pyrene 9,10-dioxygenase activity	1	ENSDARG00000101195,ENSDARG00000101789
0.00227	33	14	4	0.286	0.121	HP:0100021	hp	26	Cerebral palsy	1	ENSDARG00000006220,ENSDARG00000061896,ENSDARG00000089507,ENSDARG00000097491
0.0167	2	77	2	0.026	1	GO:0008389	MF	32	coumarin 7-hydroxylase activity	1	ENSDARG00000101195,ENSDARG00000101789
0.0123	33	24	3	0.125	0.091	KEGG:00982	keg	33	Drug metabolism - cytochrome P450	1	ENSDARG00000006220,ENSDARG00000033364,ENSDARG00000104068
0.0146	5506	79	37	0.468	0.007	TF:M07296_1	tf	2	Factor: MAF; motif: GCTGAGTCAN; match class: 1	1	ENSDARG00000002196,ENSDARG00000003902,ENSDARG00000005713,ENSDARG00000006220,ENSDARG00000017034,ENSDARG00000019236,ENSDARG00000021149,ENSDARG00000028012,ENSDARG00000030896,ENSDARG00000031952,ENSDARG00000032496,ENSDARG00000035890,ENSDARG00000038729,ENSDARG00000043243,ENSDARG00000052215,ENSDARG00000052618,ENSDARG00000053005,ENSDARG00000055253,ENSDARG00000056638,ENSDARG00000059387,ENSDARG00000061481,…
0.00191	9	14	3	0.214	0.333	HP:0040279	hp	22	Frequency	1	ENSDARG00000006220,ENSDARG00000089507,ENSDARG00000097491
0.0446	51	24	3	0.125	0.059	KEGG:00480	keg	27	Glutathione metabolism	1	ENSDARG00000019236,ENSDARG00000033364,ENSDARG00000104068
0.000801	7	14	3	0.214	0.429	HP:0001343	hp	19	Kernicterus	1	ENSDARG00000006220,ENSDARG00000089507,ENSDARG00000097491
1.99e-07	35	24	6	0.25	0.171	KEGG:00980	keg	13	Metabolism of xenobiotics by cytochrome P450	1	ENSDARG00000006220,ENSDARG00000021149,ENSDARG00000033364,ENSDARG00000068934,ENSDARG00000098315,ENSDARG00000104068
0.00273	10	14	3	0.214	0.3	HP:0003265	hp	25	Neonatal hyperbilirubinemia	1	ENSDARG00000006220,ENSDARG00000089507,ENSDARG00000097491
0.000801	7	14	3	0.214	0.429	HP:0008176	hp	6	Neonatal unconjugated hyperbilirubinemia	1	ENSDARG00000006220,ENSDARG00000089507,ENSDARG00000097491
0.0126	16	14	3	0.214	0.188	HP:0012246	hp	20	Oculomotor nerve palsy	1	ENSDARG00000006220,ENSDARG00000089507,ENSDARG00000097491
0.00603	813	77	13	0.169	0.016	GO:0055114	BP	5	oxidation-reduction process	1	ENSDARG00000014646,ENSDARG00000017034,ENSDARG00000019236,ENSDARG00000021149,ENSDARG00000058734,ENSDARG00000061481,ENSDARG00000061634,ENSDARG00000068934,ENSDARG00000077549,ENSDARG00000098315,ENSDARG00000101195,ENSDARG00000101789,ENSDARG00000103456
0.00242	748	77	13	0.169	0.017	GO:0016491	MF	11	oxidoreductase activity	1	ENSDARG00000014646,ENSDARG00000017034,ENSDARG00000019236,ENSDARG00000021149,ENSDARG00000033364,ENSDARG00000058734,ENSDARG00000061634,ENSDARG00000068934,ENSDARG00000077549,ENSDARG00000098315,ENSDARG00000101195,ENSDARG00000101789,ENSDARG00000103456
1.48e-06	1384	77	22	0.286	0.016	GO:0042221	BP	1	response to chemical	1	ENSDARG00000002311,ENSDARG00000006220,ENSDARG00000019236,ENSDARG00000021787,ENSDARG00000021833,ENSDARG00000030896,ENSDARG00000032496,ENSDARG00000033364,ENSDARG00000052618,ENSDARG00000055186,ENSDARG00000057633,ENSDARG00000058734,ENSDARG00000059387,ENSDARG00000061841,ENSDARG00000068934,ENSDARG00000086826,ENSDARG00000089697,ENSDARG00000098315,ENSDARG00000098589,ENSDARG00000099702,ENSDARG00000104068,…
0.0123	33	24	3	0.125	0.091	KEGG:00140	keg	17	Steroid hormone biosynthesis	1	ENSDARG00000006220,ENSDARG00000068934,ENSDARG00000098315
0.0261	10	24	2	0.083	0.2	KEGG:00920	keg	31	Sulfur metabolism	1	ENSDARG00000005713,ENSDARG00000017034
0.0499	3	77	2	0.026	0.667	GO:0050649	MF	29	testosterone 6-beta-hydroxylase activity	1	ENSDARG00000101195,ENSDARG00000101789
0.00149	153	77	7	0.091	0.046	GO:0046906	MF	3	tetrapyrrole binding	1	ENSDARG00000031952,ENSDARG00000068934,ENSDARG00000098315,ENSDARG00000098589,ENSDARG00000101195,ENSDARG00000101789,ENSDARG00000103456
0.0167	2	77	2	0.026	1	GO:0008119	MF	28	thiopurine S-methyltransferase activity	1	ENSDARG00000028012,ENSDARG00000055974
0.0183	18	14	3	0.214	0.167	HP:0008282	hp	10	Unconjugated hyperbilirubinemia	1	ENSDARG00000006220,ENSDARG00000089507,ENSDARG00000097491
ENSEMBL ID	GeneSymbol	Description
ENSDARG00000002196	BACH1B	BTB and CNC homology 1, basic leucine zipper transcription factor 1 b [Source:ZFIN;Acc:ZDB-GENE-050522-220]
ENSDARG00000002311	FABP11B	fatty acid binding protein 11b [Source:ZFIN;Acc:ZDB-GENE-050522-391]
ENSDARG00000002405	SI:CH211-225B11.1	si:ch211-225b11.1 [Source:ZFIN;Acc:ZDB-GENE-060531-39]
ENSDARG00000003902	CTSL.1	cathepsin L.1 [Source:ZFIN;Acc:ZDB-GENE-040718-61]
ENSDARG00000004748	ZGC:100868	zgc:100868 [Source:ZFIN;Acc:ZDB-GENE-040801-33]
ENSDARG00000005713	ETHE1	ethylmalonic encephalopathy 1 [Source:ZFIN;Acc:ZDB-GENE-040426-2503]
ENSDARG00000006220	UGT1AB	UDP glucuronosyltransferase 1 family a, b [Source:ZFIN;Acc:ZDB-GENE-040426-2762]
ENSDARG00000007289	METRNL	si:dkey-27j5.3 [Source:ZFIN;Acc:ZDB-GENE-121214-223]
ENSDARG00000007950	ITGA11B	integrin, alpha 11b [Source:ZFIN;Acc:ZDB-GENE-071009-4]
ENSDARG00000010940	BX957278.1	N/A
ENSDARG00000014646	AOC2	amine oxidase, copper containing 2 [Source:ZFIN;Acc:ZDB-GENE-050320-133]
ENSDARG00000015144	SH2D4BB	SH2 domain containing 4Bb [Source:ZFIN;Acc:ZDB-GENE-130531-42]
ENSDARG00000017034	SQRDL	sulfide quinone reductase-like (yeast) [Source:ZFIN;Acc:ZDB-GENE-050417-436]
ENSDARG00000017195	FOXF2A	forkhead box F2a [Source:ZFIN;Acc:ZDB-GENE-110407-5]
ENSDARG00000019236	GSR	glutathione reductase [Source:ZFIN;Acc:ZDB-GENE-050522-116]
ENSDARG00000021149	CBR1L	carbonyl reductase 1-like [Source:ZFIN;Acc:ZDB-GENE-030131-9642]
ENSDARG00000021787	ABCB5	ATP-binding cassette, sub-family B (MDR/TAP), member 5 [Source:ZFIN;Acc:ZDB-GENE-030131-6414]
ENSDARG00000021833	AHR2	aryl hydrocarbon receptor 2 [Source:ZFIN;Acc:ZDB-GENE-990714-16]
ENSDARG00000027088	PTGDSB.1	prostaglandin D2 synthase b, tandem duplicate 1 [Source:ZFIN;Acc:ZDB-GENE-030131-8436]
ENSDARG00000028012	TPMT.2	thiopurine S-methyltransferase, tandem duplicate 2 [Source:ZFIN;Acc:ZDB-GENE-041010-177]
ENSDARG00000030896	FOXQ1A	forkhead box Q1a [Source:ZFIN;Acc:ZDB-GENE-070424-74]
ENSDARG00000031952	MB	myoglobin [Source:ZFIN;Acc:ZDB-GENE-040426-1430]
ENSDARG00000032496	PON1	paraoxonase 1 [Source:ZFIN;Acc:ZDB-GENE-040912-6]
ENSDARG00000033364	MGST3B	microsomal glutathione S-transferase 3b [Source:ZFIN;Acc:ZDB-GENE-061215-48]
ENSDARG00000033544	ADAMTS15B	ADAM metallopeptidase with thrombospondin type 1 motif, 15b [Source:ZFIN;Acc:ZDB-GENE-070814-5]
ENSDARG00000035890	FUCA1.1	fucosidase, alpha-L- 1, tissue, tandem duplicate 1 [Source:ZFIN;Acc:ZDB-GENE-030131-7434]
ENSDARG00000037432	HAUS7	HAUS augmin-like complex, subunit 7 [Source:ZFIN;Acc:ZDB-GENE-050506-15]
ENSDARG00000038729	S100Z	S100 calcium binding protein Z [Source:ZFIN;Acc:ZDB-GENE-050522-69]
ENSDARG00000043243	PRKCHB	protein kinase C, eta, b [Source:ZFIN;Acc:ZDB-GENE-041001-104]
ENSDARG00000043442	MAL	zgc:158773 [Source:ZFIN;Acc:ZDB-GENE-070424-9]
ENSDARG00000043806	POSTNA	periostin, osteoblast specific factor a [Source:ZFIN;Acc:ZDB-GENE-091113-23]
ENSDARG00000052215	BTR02	bloodthirsty-related gene family, member 2 [Source:ZFIN;Acc:ZDB-GENE-060825-228]
ENSDARG00000052618	AHRRB	aryl-hydrocarbon receptor repressor b [Source:ZFIN;Acc:ZDB-GENE-051018-2]
ENSDARG00000053005	CD22	cd22 molecule [Source:ZFIN;Acc:ZDB-GENE-050522-521]
ENSDARG00000055186	CCR9A	chemokine (C-C motif) receptor 9a [Source:ZFIN;Acc:ZDB-GENE-060130-125]
ENSDARG00000055253	SLC12A10.3	slc12a10.3 solute carrier family 12 (sodium/potassium/chloride transporters), member 10, tandem duplicate 3 [Source:ZFIN;Acc:ZDB-GENE-060503-518]
ENSDARG00000055974	TPMT.1	thiopurine S-methyltransferase, tandem duplicate 1 [Source:ZFIN;Acc:ZDB-GENE-050522-141]
ENSDARG00000056638	PIR	pirin [Source:ZFIN;Acc:ZDB-GENE-040718-288]
ENSDARG00000057633	CXCR4A	chemokine (C-X-C motif) receptor 4a [Source:ZFIN;Acc:ZDB-GENE-020102-1]
ENSDARG00000058734	PRDX1	peroxiredoxin 1 [Source:ZFIN;Acc:ZDB-GENE-050320-35]
ENSDARG00000059387	FGF7	fibroblast growth factor 7 [Source:ZFIN;Acc:ZDB-GENE-080122-1]
ENSDARG00000059993	TRPM4A	transient receptor potential cation channel, subfamily M, member 4a [Source:ZFIN;Acc:ZDB-GENE-090302-3]
ENSDARG00000061481	WU:FJ05G07	wu:fj05g07 [Source:ZFIN;Acc:ZDB-GENE-030131-7307]
ENSDARG00000061634	AIFM4	apoptosis-inducing factor, mitochondrion-associated, 4 [Source:ZFIN;Acc:ZDB-GENE-070112-2282]
ENSDARG00000061682	BICC1A	BicC family RNA binding protein 1a [Source:ZFIN;Acc:ZDB-GENE-101223-3]
ENSDARG00000061841	TIPARP	TCDD-inducible poly(ADP-ribose) polymerase [Source:ZFIN;Acc:ZDB-GENE-031002-47]
ENSDARG00000061896	SLCO2A1	solute carrier organic anion transporter family, member 2A1 [Source:ZFIN;Acc:ZDB-GENE-060606-3]
ENSDARG00000063297	ABCB6A	ATP-binding cassette, sub-family B (MDR/TAP), member 6a [Source:ZFIN;Acc:ZDB-GENE-050517-9]
ENSDARG00000068551	ELOVL8A	ELOVL fatty acid elongase 8a [Source:ZFIN;Acc:ZDB-GENE-060929-240]
ENSDARG00000068934	CYP1B1	cytochrome P450, family 1, subfamily B, polypeptide 1 [Source:ZFIN;Acc:ZDB-GENE-030902-1]
ENSDARG00000071341	ABCH1	ATP-binding cassette, sub-family H, member 1 [Source:ZFIN;Acc:ZDB-GENE-050517-42]
ENSDARG00000071567	TSTD1	si:dkey-34l15.1 [Source:ZFIN;Acc:ZDB-GENE-081107-63]
ENSDARG00000073695	MAMDC2B	MAM domain containing 2b [Source:ZFIN;Acc:ZDB-GENE-091117-16]
ENSDARG00000073912	SI:CH211-202H22.7	si:ch211-202h22.7 [Source:ZFIN;Acc:ZDB-GENE-090313-77]
ENSDARG00000074149	ITPR1B	inositol 1,4,5-trisphosphate receptor, type 1b [Source:ZFIN;Acc:ZDB-GENE-070604-2]
ENSDARG00000076534	SI:CH211-14A17.10	si:ch211-14a17.10 [Source:ZFIN;Acc:ZDB-GENE-030616-581]
ENSDARG00000076787	ANGPT4	angiopoietin 4 [Source:ZFIN;Acc:ZDB-GENE-110104-1]
ENSDARG00000076830	SI:DKEY-65B12.6	si:dkey-65b12.6 [Source:ZFIN;Acc:ZDB-GENE-060526-329]
ENSDARG00000077549	AIFM2	apoptosis-inducing factor, mitochondrion-associated, 2 [Source:ZFIN;Acc:ZDB-GENE-050506-76]
ENSDARG00000078404	CDH26.1	cadherin 26, tandem duplicate 1 [Source:ZFIN;Acc:ZDB-GENE-100922-193]
ENSDARG00000078567	LONRF1L	LON peptidase N-terminal domain and ring finger 1, like [Source:ZFIN;Acc:ZDB-GENE-081104-397]
ENSDARG00000086826	SULT6B1	sulfotransferase family, cytosolic, 6b, member 1 [Source:ZFIN;Acc:ZDB-GENE-050417-228]
ENSDARG00000087492	FO704810.1	N/A
ENSDARG00000089507	UGT1B5	UDP glucuronosyltransferase 1 family, polypeptide B5 [Source:ZFIN;Acc:ZDB-GENE-080227-14]
ENSDARG00000089586	NCAM3	neural cell adhesion molecule 3 [Source:ZFIN;Acc:ZDB-GENE-131127-340]
ENSDARG00000089697	NFE2L2B	nuclear factor, erythroid 2-like 2b [Source:ZFIN;Acc:ZDB-GENE-120320-3]
ENSDARG00000089936	SEPW2B	selenoprotein W, 2b [Source:ZFIN;Acc:ZDB-GENE-030428-2]
ENSDARG00000090401	CABZ01020840.1	N/A
ENSDARG00000091116	PKHD1L1	polycystic kidney and hepatic disease 1 (autosomal recessive)-like 1 [Source:ZFIN;Acc:ZDB-GENE-060503-475]
ENSDARG00000091715	SI:DKEY-162H11.2	si:dkey-162h11.2 [Source:ZFIN;Acc:ZDB-GENE-121214-90]
ENSDARG00000093584	ZGC:193505	zgc:193505 [Source:ZFIN;Acc:ZDB-GENE-030131-7103]
ENSDARG00000093936	SI:DKEYP-1H4.6	si:dkeyp-1h4.6 [Source:ZFIN;Acc:ZDB-GENE-060503-841]
ENSDARG00000096545	SI:CH211-191A16.5	si:ch211-191a16.5 [Source:ZFIN;Acc:ZDB-GENE-121214-56]
ENSDARG00000097491	UGT1B1	UDP glucuronosyltransferase 1 family, polypeptide B1 [Source:ZFIN;Acc:ZDB-GENE-080227-10]
ENSDARG00000098315	CYP1A	cytochrome P450, family 1, subfamily A [Source:ZFIN;Acc:ZDB-GENE-011219-1]
ENSDARG00000098588	GCHFR	GTP cyclohydrolase I feedback regulator [Source:ZFIN;Acc:ZDB-GENE-040426-1731]
ENSDARG00000098589	CYB5A	cytochrome b5 type A (microsomal) [Source:ZFIN;Acc:ZDB-GENE-040426-2148]
ENSDARG00000098746	DHRS13L1	dehydrogenase/reductase (SDR family) member 13 like 1 [Source:ZFIN;Acc:ZDB-GENE-040426-1907]
ENSDARG00000098761	RGS2	regulator of G protein signaling 2 [Source:ZFIN;Acc:ZDB-GENE-040718-410]
ENSDARG00000099313	NAGA	N-acetylgalactosaminidase, alpha [Source:ZFIN;Acc:ZDB-GENE-051113-256]
ENSDARG00000099702	CABZ01103755.1	N/A
ENSDARG00000101195	CYP1C1	cytochrome P450, family 1, subfamily C, polypeptide 1 [Source:ZFIN;Acc:ZDB-GENE-050522-501]
ENSDARG00000101364	WFIKKN1	WAP, follistatin/kazal, immunoglobulin, kunitz and netrin domain containing 1 [Source:ZFIN;Acc:ZDB-GENE-040426-2465]
ENSDARG00000101789	CYP1C2	cytochrome P450, family 1, subfamily C, polypeptide 2 [Source:ZFIN;Acc:ZDB-GENE-050705-1]
ENSDARG00000103398	FABP1B.2	fatty acid binding protein 1b, liver, tandem duplicate 2 [Source:ZFIN;Acc:ZDB-GENE-100318-6]
ENSDARG00000103456	CYP2AA11	cytochrome P450, family 2, subfamily AA, polypeptide 11 [Source:ZFIN;Acc:ZDB-GENE-110114-3]
ENSDARG00000104068	GSTP1	glutathione S-transferase pi 1 [Source:ZFIN;Acc:ZDB-GENE-020806-4]
ENSDARG00000104292	CTGFB	connective tissue growth factor b [Source:ZFIN;Acc:ZDB-GENE-070705-82]
ENSDARG00000104474	IL6R	interleukin 6 receptor [Source:ZFIN;Acc:ZDB-GENE-080107-7]

## Sheet: BkF
p-value	T	Q	Q&T	Q&T/Q	Q&T/T	term ID	t type	t group	t name	t depth	Q&T list
0.0133	2	66	2	0.03	1	GO:0055064	BP	21	chloride ion homeostasis	1	ENSDARG00000060439,ENSDARG00000071173
0.000656	1384	66	17	0.258	0.012	GO:0042221	BP	1	response to chemical	1	ENSDARG00000006220,ENSDARG00000006868,ENSDARG00000021833,ENSDARG00000030896,ENSDARG00000032571,ENSDARG00000042824,ENSDARG00000045768,ENSDARG00000052618,ENSDARG00000062632,ENSDARG00000068934,ENSDARG00000086826,ENSDARG00000089697,ENSDARG00000098058,ENSDARG00000098315,ENSDARG00000098589,ENSDARG00000099702,ENSDARG00000104068
1.29e-17	47	66	12	0.182	0.255	GO:0009410	BP	1	response to xenobiotic stimulus	2	ENSDARG00000006220,ENSDARG00000021833,ENSDARG00000030896,ENSDARG00000042824,ENSDARG00000052618,ENSDARG00000068934,ENSDARG00000086826,ENSDARG00000098058,ENSDARG00000098315,ENSDARG00000098589,ENSDARG00000099702,ENSDARG00000104068
0.000223	840	66	14	0.212	0.017	GO:0070887	BP	1	cellular response to chemical stimulus	1	ENSDARG00000006220,ENSDARG00000006868,ENSDARG00000021833,ENSDARG00000032571,ENSDARG00000042824,ENSDARG00000052618,ENSDARG00000062632,ENSDARG00000068934,ENSDARG00000086826,ENSDARG00000089697,ENSDARG00000098058,ENSDARG00000098315,ENSDARG00000098589,ENSDARG00000104068
1.39e-14	37	66	10	0.152	0.27	GO:0071466	BP	1	cellular response to xenobiotic stimulus	2	ENSDARG00000006220,ENSDARG00000021833,ENSDARG00000042824,ENSDARG00000052618,ENSDARG00000068934,ENSDARG00000086826,ENSDARG00000098058,ENSDARG00000098315,ENSDARG00000098589,ENSDARG00000104068
0.0133	2	66	2	0.03	1	GO:0034811	MF	24	benzo(a)pyrene 9,10-dioxygenase activity	1	ENSDARG00000101195,ENSDARG00000101789
0.0327	189	66	6	0.091	0.032	GO:0005506	MF	22	iron ion binding	1	ENSDARG00000068910,ENSDARG00000068934,ENSDARG00000098315,ENSDARG00000101195,ENSDARG00000101789,ENSDARG00000103456
0.00477	135	66	6	0.091	0.044	GO:0004497	MF	13	monooxygenase activity	1	ENSDARG00000068910,ENSDARG00000068934,ENSDARG00000098315,ENSDARG00000101195,ENSDARG00000101789,ENSDARG00000103456
0.0226	177	66	6	0.091	0.034	GO:0016705	MF	13	oxidoreductase activity, acting on paired donors, with incorporation or reduction of molecular oxygen	1	ENSDARG00000068910,ENSDARG00000068934,ENSDARG00000098315,ENSDARG00000101195,ENSDARG00000101789,ENSDARG00000103456
0.0133	2	66	2	0.03	1	GO:0008389	MF	13	coumarin 7-hydroxylase activity	2	ENSDARG00000101195,ENSDARG00000101789
0.04	3	66	2	0.03	0.667	GO:0050649	MF	9	testosterone 6-beta-hydroxylase activity	1	ENSDARG00000101195,ENSDARG00000101789
2.75e-05	153	66	8	0.121	0.052	GO:0046906	MF	5	tetrapyrrole binding	1	ENSDARG00000062632,ENSDARG00000068910,ENSDARG00000068934,ENSDARG00000098315,ENSDARG00000098589,ENSDARG00000101195,ENSDARG00000101789,ENSDARG00000103456
2.35e-05	150	66	8	0.121	0.053	GO:0020037	MF	5	heme binding	2	ENSDARG00000062632,ENSDARG00000068910,ENSDARG00000068934,ENSDARG00000098315,ENSDARG00000098589,ENSDARG00000101195,ENSDARG00000101789,ENSDARG00000103456
0.04	3	66	2	0.03	0.667	GO:0070330	MF	19	aromatase activity	1	ENSDARG00000068934,ENSDARG00000098315
0.0133	2	66	2	0.03	1	GO:0034813	MF	18	benzo(a)pyrene 7,8-dioxygenase activity	1	ENSDARG00000101195,ENSDARG00000101789
0.00155	7	16	3	0.188	0.429	HP:0001343	hp	4	Kernicterus	1	ENSDARG00000006220,ENSDARG00000089507,ENSDARG00000097491
0.00514	33	16	4	0.25	0.121	HP:0100021	hp	17	Cerebral palsy	1	ENSDARG00000006220,ENSDARG00000061896,ENSDARG00000089507,ENSDARG00000097491
0.00371	9	16	3	0.188	0.333	HP:0040279	hp	3	Frequency	1	ENSDARG00000006220,ENSDARG00000089507,ENSDARG00000097491
0.00371	9	16	3	0.188	0.333	HP:0040284	hp	3	Very rare	2	ENSDARG00000006220,ENSDARG00000089507,ENSDARG00000097491
0.00528	10	16	3	0.188	0.3	HP:0003265	hp	15	Neonatal hyperbilirubinemia	1	ENSDARG00000006220,ENSDARG00000089507,ENSDARG00000097491
0.00155	7	16	3	0.188	0.429	HP:0008176	hp	8	Neonatal unconjugated hyperbilirubinemia	1	ENSDARG00000006220,ENSDARG00000089507,ENSDARG00000097491
0.0243	16	16	3	0.188	0.188	HP:0012246	hp	16	Oculomotor nerve palsy	1	ENSDARG00000006220,ENSDARG00000089507,ENSDARG00000097491
0.0353	18	16	3	0.188	0.167	HP:0008282	hp	20	Unconjugated hyperbilirubinemia	1	ENSDARG00000006220,ENSDARG00000089507,ENSDARG00000097491
1.93e-05	35	12	4	0.333	0.114	KEGG:00980	keg	12	Metabolism of xenobiotics by cytochrome P450	1	ENSDARG00000006220,ENSDARG00000068934,ENSDARG00000098315,ENSDARG00000104068
0.00118	33	12	3	0.25	0.091	KEGG:00140	keg	23	Steroid hormone biosynthesis	1	ENSDARG00000006220,ENSDARG00000068934,ENSDARG00000098315
ENSEMBL ID	GeneSymbol	Description
ENSDARG00000002847	FNDC1	fibronectin type III domain containing 1 [Source:ZFIN;Acc:ZDB-GENE-041210-332]
ENSDARG00000003216	ANXA2A	annexin A2a [Source:ZFIN;Acc:ZDB-GENE-030131-4282]
ENSDARG00000003902	CTSL.1	cathepsin L.1 [Source:ZFIN;Acc:ZDB-GENE-040718-61]
ENSDARG00000006220	UGT1AB	UDP glucuronosyltransferase 1 family a, b [Source:ZFIN;Acc:ZDB-GENE-040426-2762]
ENSDARG00000006868	TRH	thyrotropin-releasing hormone [Source:ZFIN;Acc:ZDB-GENE-020930-1]
ENSDARG00000014626	DLX3B	distal-less homeobox 3b [Source:ZFIN;Acc:ZDB-GENE-980526-280]
ENSDARG00000015654	CA15A	carbonic anhydrase XVa [Source:ZFIN;Acc:ZDB-GENE-070424-7]
ENSDARG00000017739	AK5L	adenylate kinase 5, like [Source:ZFIN;Acc:ZDB-GENE-050410-2]
ENSDARG00000020086	NUAK1A	NUAK family, SNF1-like kinase, 1a [Source:ZFIN;Acc:ZDB-GENE-041210-122]
ENSDARG00000021833	AHR2	aryl hydrocarbon receptor 2 [Source:ZFIN;Acc:ZDB-GENE-990714-16]
ENSDARG00000027088	PTGDSB.1	prostaglandin D2 synthase b, tandem duplicate 1 [Source:ZFIN;Acc:ZDB-GENE-030131-8436]
ENSDARG00000030896	FOXQ1A	forkhead box Q1a [Source:ZFIN;Acc:ZDB-GENE-070424-74]
ENSDARG00000032571	IL20RA	interleukin 20 receptor, alpha [Source:ZFIN;Acc:ZDB-GENE-040724-249]
ENSDARG00000036767	SI:DKEY-204A24.10	si:dkey-204a24.10 [Source:ZFIN;Acc:ZDB-GENE-120215-160]
ENSDARG00000036840	KRT15	keratin 15 [Source:ZFIN;Acc:ZDB-GENE-040426-2931]
ENSDARG00000042824	NFE2L2A	nuclear factor, erythroid 2-like 2a [Source:ZFIN;Acc:ZDB-GENE-030723-2]
ENSDARG00000043243	PRKCHB	protein kinase C, eta, b [Source:ZFIN;Acc:ZDB-GENE-041001-104]
ENSDARG00000043442	MAL	zgc:158773 [Source:ZFIN;Acc:ZDB-GENE-070424-9]
ENSDARG00000045768	CRY1AA	cryptochrome circadian clock 1aa [Source:ZFIN;Acc:ZDB-GENE-010426-2]
ENSDARG00000052215	BTR02	bloodthirsty-related gene family, member 2 [Source:ZFIN;Acc:ZDB-GENE-060825-228]
ENSDARG00000052618	AHRRB	aryl-hydrocarbon receptor repressor b [Source:ZFIN;Acc:ZDB-GENE-051018-2]
ENSDARG00000052705	PKP1B	plakophilin 1b [Source:ZFIN;Acc:ZDB-GENE-030131-417]
ENSDARG00000055534	GRK7B	G protein-coupled receptor kinase 7b [Source:ZFIN;Acc:ZDB-GENE-030904-3]
ENSDARG00000060439	CLCN2C	chloride channel 2c [Source:ZFIN;Acc:ZDB-GENE-050506-73]
ENSDARG00000061481	WU:FJ05G07	wu:fj05g07 [Source:ZFIN;Acc:ZDB-GENE-030131-7307]
ENSDARG00000061896	SLCO2A1	solute carrier organic anion transporter family, member 2A1 [Source:ZFIN;Acc:ZDB-GENE-060606-3]
ENSDARG00000062632	DUOX	dual oxidase [Source:ZFIN;Acc:ZDB-GENE-091117-14]
ENSDARG00000063661	NUAK2	NUAK family, SNF1-like kinase, 2 [Source:ZFIN;Acc:ZDB-GENE-050208-563]
ENSDARG00000068876	ZGC:153031	zgc:153031 [Source:ZFIN;Acc:ZDB-GENE-060929-1190]
ENSDARG00000068910	NOS1	nitric oxide synthase 1 (neuronal) [Source:ZFIN;Acc:ZDB-GENE-001101-1]
ENSDARG00000068934	CYP1B1	cytochrome P450, family 1, subfamily B, polypeptide 1 [Source:ZFIN;Acc:ZDB-GENE-030902-1]
ENSDARG00000070331	MUC5.1	mucin 5.1, oligomeric mucus/gel-forming [Source:ZFIN;Acc:ZDB-GENE-120822-1]
ENSDARG00000070578	EDN2	endothelin 2 [Source:ZFIN;Acc:ZDB-GENE-060503-774]
ENSDARG00000071173	SLC12A10.2	solute carrier family 12 (sodium/potassium/chloride transporters), member 10, tandem duplicate 2 [Source:ZFIN;Acc:ZDB-GENE-060503-425]
ENSDARG00000071567	TSTD1	si:dkey-34l15.1 [Source:ZFIN;Acc:ZDB-GENE-081107-63]
ENSDARG00000071626	PTGDSB.2	prostaglandin D2 synthase b, tandem duplicate 2 [Source:ZFIN;Acc:ZDB-GENE-030911-3]
ENSDARG00000073695	MAMDC2B	MAM domain containing 2b [Source:ZFIN;Acc:ZDB-GENE-091117-16]
ENSDARG00000073912	SI:CH211-202H22.7	si:ch211-202h22.7 [Source:ZFIN;Acc:ZDB-GENE-090313-77]
ENSDARG00000074752	HLFA	hepatic leukemia factor a [Source:ZFIN;Acc:ZDB-GENE-061013-159]
ENSDARG00000076830	SI:DKEY-65B12.6	si:dkey-65b12.6 [Source:ZFIN;Acc:ZDB-GENE-060526-329]
ENSDARG00000078567	LONRF1L	LON peptidase N-terminal domain and ring finger 1, like [Source:ZFIN;Acc:ZDB-GENE-081104-397]
ENSDARG00000078962	DUOX2	dual oxidase 2 [Source:ZFIN;Acc:ZDB-GENE-111007-1]
ENSDARG00000079119	SI:CH211-229D2.5	si:ch211-229d2.5 [Source:ZFIN;Acc:ZDB-GENE-121214-200]
ENSDARG00000079302	AND2	actinodin2 [Source:ZFIN;Acc:ZDB-GENE-041105-2]
ENSDARG00000079602	CALHM3	calcium homeostasis modulator 3 [Source:ZFIN;Acc:ZDB-GENE-081107-70]
ENSDARG00000086826	SULT6B1	sulfotransferase family, cytosolic, 6b, member 1 [Source:ZFIN;Acc:ZDB-GENE-050417-228]
ENSDARG00000087440	PONZR4	plac8 onzin related protein 4 [Source:ZFIN;Acc:ZDB-GENE-050411-6]
ENSDARG00000088589	PONZR3	plac8 onzin related protein 3 [Source:ZFIN;Acc:ZDB-GENE-050506-38]
ENSDARG00000089507	UGT1B5	UDP glucuronosyltransferase 1 family, polypeptide B5 [Source:ZFIN;Acc:ZDB-GENE-080227-14]
ENSDARG00000089586	NCAM3	neural cell adhesion molecule 3 [Source:ZFIN;Acc:ZDB-GENE-131127-340]
ENSDARG00000089667	MFAP4	si:zfos-2330d3.3 [Source:ZFIN;Acc:ZDB-GENE-110408-14]
ENSDARG00000089697	NFE2L2B	nuclear factor, erythroid 2-like 2b [Source:ZFIN;Acc:ZDB-GENE-120320-3]
ENSDARG00000089936	SEPW2B	selenoprotein W, 2b [Source:ZFIN;Acc:ZDB-GENE-030428-2]
ENSDARG00000090268	KRTT1C19E	keratin type 1 c19e [Source:ZFIN;Acc:ZDB-GENE-050506-95]
ENSDARG00000091116	PKHD1L1	polycystic kidney and hepatic disease 1 (autosomal recessive)-like 1 [Source:ZFIN;Acc:ZDB-GENE-060503-475]
ENSDARG00000091715	SI:DKEY-162H11.2	si:dkey-162h11.2 [Source:ZFIN;Acc:ZDB-GENE-121214-90]
ENSDARG00000093048	SI:CH211-158D24.4	si:ch211-158d24.4 [Source:ZFIN;Acc:ZDB-GENE-081104-141]
ENSDARG00000094281	SI:CH73-196I15.3	si:ch73-196i15.3 [Source:ZFIN;Acc:ZDB-GENE-091116-4]
ENSDARG00000097157	SI:CH211-207N23.2	si:ch211-207n23.2 [Source:ZFIN;Acc:ZDB-GENE-131121-310]
ENSDARG00000097491	UGT1B1	UDP glucuronosyltransferase 1 family, polypeptide B1 [Source:ZFIN;Acc:ZDB-GENE-080227-10]
ENSDARG00000098058	IM:7150988	im:7150988 [Source:ZFIN;Acc:ZDB-GENE-050309-169]
ENSDARG00000098315	CYP1A	cytochrome P450, family 1, subfamily A [Source:ZFIN;Acc:ZDB-GENE-011219-1]
ENSDARG00000098589	CYB5A	cytochrome b5 type A (microsomal) [Source:ZFIN;Acc:ZDB-GENE-040426-2148]
ENSDARG00000098746	DHRS13L1	dehydrogenase/reductase (SDR family) member 13 like 1 [Source:ZFIN;Acc:ZDB-GENE-040426-1907]
ENSDARG00000099702	CABZ01103755.1	N/A
ENSDARG00000100265	RHCGB	Rh family, C glycoprotein b [Source:ZFIN;Acc:ZDB-GENE-040426-2595]
ENSDARG00000101012	CABZ01051600.1	N/A
ENSDARG00000101195	CYP1C1	cytochrome P450, family 1, subfamily C, polypeptide 1 [Source:ZFIN;Acc:ZDB-GENE-050522-501]
ENSDARG00000101364	WFIKKN1	WAP, follistatin/kazal, immunoglobulin, kunitz and netrin domain containing 1 [Source:ZFIN;Acc:ZDB-GENE-040426-2465]
ENSDARG00000101789	CYP1C2	cytochrome P450, family 1, subfamily C, polypeptide 2 [Source:ZFIN;Acc:ZDB-GENE-050705-1]
ENSDARG00000102558	PDE6H	phosphodiesterase 6H, cGMP-specific, cone, gamma [Source:ZFIN;Acc:ZDB-GENE-040426-1754]
ENSDARG00000103199	SI:DKEY-247K7.2	si:dkey-247k7.2 [Source:ZFIN;Acc:ZDB-GENE-031118-45]
ENSDARG00000103456	CYP2AA11	cytochrome P450, family 2, subfamily AA, polypeptide 11 [Source:ZFIN;Acc:ZDB-GENE-110114-3]
ENSDARG00000103981	BHLHA9	basic helix-loop-helix family, member a9 [Source:ZFIN;Acc:ZDB-GENE-030131-2201]
ENSDARG00000104068	GSTP1	glutathione S-transferase pi 1 [Source:ZFIN;Acc:ZDB-GENE-020806-4]
ENSDARG00000104292	CTGFB	connective tissue growth factor b [Source:ZFIN;Acc:ZDB-GENE-070705-82]
ENSDARG00000105863	FO904970.1	N/A

## Sheet: BjF
p-value	T	Q	Q&T	Q&T/Q	Q&T/T	term ID	t type	t group	t name	t depth	Q&T list
0.0296	813	53	10	0.189	0.012	GO:0055114	BP	19	oxidation-reduction process	1	ENSDARG00000002197,ENSDARG00000017034,ENSDARG00000051925,ENSDARG00000061481,ENSDARG00000061634,ENSDARG00000068934,ENSDARG00000098315,ENSDARG00000101195,ENSDARG00000101789,ENSDARG00000103456
1.84e-14	47	53	10	0.189	0.213	GO:0009410	BP	17	response to xenobiotic stimulus	1	ENSDARG00000006220,ENSDARG00000030896,ENSDARG00000068934,ENSDARG00000086826,ENSDARG00000091996,ENSDARG00000098058,ENSDARG00000098315,ENSDARG00000098589,ENSDARG00000099702,ENSDARG00000104068
3.42e-11	37	53	8	0.151	0.216	GO:0071466	BP	17	cellular response to xenobiotic stimulus	2	ENSDARG00000006220,ENSDARG00000068934,ENSDARG00000086826,ENSDARG00000091996,ENSDARG00000098058,ENSDARG00000098315,ENSDARG00000098589,ENSDARG00000104068
0.00832	2	53	2	0.038	1	GO:0055064	BP	23	chloride ion homeostasis	1	ENSDARG00000060439,ENSDARG00000071173
0.0214	1156	53	12	0.226	0.01	GO:0005576	CC	14	extracellular region	1	ENSDARG00000003902,ENSDARG00000024775,ENSDARG00000027088,ENSDARG00000070331,ENSDARG00000070578,ENSDARG00000071626,ENSDARG00000074656,ENSDARG00000098058,ENSDARG00000100052,ENSDARG00000101364,ENSDARG00000104292,ENSDARG00000104973
0.00832	2	53	2	0.038	1	GO:0034811	MF	18	benzo(a)pyrene 9,10-dioxygenase activity	1	ENSDARG00000101195,ENSDARG00000101789
0.00832	2	53	2	0.038	1	GO:0034813	MF	29	benzo(a)pyrene 7,8-dioxygenase activity	1	ENSDARG00000101195,ENSDARG00000101789
0.0265	135	53	5	0.094	0.037	GO:0004497	MF	1	monooxygenase activity	1	ENSDARG00000068934,ENSDARG00000098315,ENSDARG00000101195,ENSDARG00000101789,ENSDARG00000103456
0.00832	2	53	2	0.038	1	GO:0008389	MF	1	coumarin 7-hydroxylase activity	1	ENSDARG00000101195,ENSDARG00000101789
0.0249	3	53	2	0.038	0.667	GO:0050649	MF	28	testosterone 6-beta-hydroxylase activity	1	ENSDARG00000101195,ENSDARG00000101789
0.0249	3	53	2	0.038	0.667	GO:0070330	MF	4	aromatase activity	1	ENSDARG00000068934,ENSDARG00000098315
0.00259	153	53	6	0.113	0.039	GO:0046906	MF	22	tetrapyrrole binding	1	ENSDARG00000068934,ENSDARG00000098315,ENSDARG00000098589,ENSDARG00000101195,ENSDARG00000101789,ENSDARG00000103456
0.00231	150	53	6	0.113	0.04	GO:0020037	MF	22	heme binding	2	ENSDARG00000068934,ENSDARG00000098315,ENSDARG00000098589,ENSDARG00000101195,ENSDARG00000101789,ENSDARG00000103456
0.00832	2	53	2	0.038	1	GO:0008119	MF	30	thiopurine S-methyltransferase activity	1	ENSDARG00000028012,ENSDARG00000055974
0.000801	7	14	3	0.214	0.429	HP:0001343	hp	26	Kernicterus	1	ENSDARG00000006220,ENSDARG00000089507,ENSDARG00000097491
0.00273	10	14	3	0.214	0.3	HP:0003265	hp	32	Neonatal hyperbilirubinemia	1	ENSDARG00000006220,ENSDARG00000089507,ENSDARG00000097491
0.00227	33	14	4	0.286	0.121	HP:0100021	hp	31	Cerebral palsy	1	ENSDARG00000006220,ENSDARG00000061896,ENSDARG00000089507,ENSDARG00000097491
0.000801	7	14	3	0.214	0.429	HP:0008176	hp	25	Neonatal unconjugated hyperbilirubinemia	1	ENSDARG00000006220,ENSDARG00000089507,ENSDARG00000097491
0.0183	18	14	3	0.214	0.167	HP:0008282	hp	11	Unconjugated hyperbilirubinemia	1	ENSDARG00000006220,ENSDARG00000089507,ENSDARG00000097491
0.00191	9	14	3	0.214	0.333	HP:0040279	hp	5	Frequency	1	ENSDARG00000006220,ENSDARG00000089507,ENSDARG00000097491
0.00191	9	14	3	0.214	0.333	HP:0040284	hp	5	Very rare	2	ENSDARG00000006220,ENSDARG00000089507,ENSDARG00000097491
0.0126	16	14	3	0.214	0.188	HP:0012246	hp	12	Oculomotor nerve palsy	1	ENSDARG00000006220,ENSDARG00000089507,ENSDARG00000097491
0.00816	10	14	2	0.143	0.2	KEGG:00920	keg	7	Sulfur metabolism	1	ENSDARG00000005713,ENSDARG00000017034
4.33e-05	35	14	4	0.286	0.114	KEGG:00980	keg	13	Metabolism of xenobiotics by cytochrome P450	1	ENSDARG00000006220,ENSDARG00000068934,ENSDARG00000098315,ENSDARG00000104068
0.00217	33	14	3	0.214	0.091	KEGG:00140	keg	16	Steroid hormone biosynthesis	1	ENSDARG00000006220,ENSDARG00000068934,ENSDARG00000098315
0.00463	3431	56	22	0.393	0.006	TF:M01655_1	tf	3	Factor: p53; motif: GGACATGYYCGGACATGYYC; match class: 1	1	ENSDARG00000003902,ENSDARG00000005713,ENSDARG00000006220,ENSDARG00000006978,ENSDARG00000024775,ENSDARG00000027088,ENSDARG00000028012,ENSDARG00000030896,ENSDARG00000051925,ENSDARG00000055974,ENSDARG00000060439,ENSDARG00000061634,ENSDARG00000068934,ENSDARG00000071626,ENSDARG00000074656,ENSDARG00000086826,ENSDARG00000089697,ENSDARG00000090268,ENSDARG00000091996,ENSDARG00000097491,ENSDARG00000101364,…
ENSEMBL ID	GeneSymbol	Description
ENSDARG00000002197	PYGL	phosphorylase, glycogen, liver [Source:ZFIN;Acc:ZDB-GENE-041205-1]
ENSDARG00000003902	CTSL.1	cathepsin L.1 [Source:ZFIN;Acc:ZDB-GENE-040718-61]
ENSDARG00000005713	ETHE1	ethylmalonic encephalopathy 1 [Source:ZFIN;Acc:ZDB-GENE-040426-2503]
ENSDARG00000006220	UGT1AB	UDP glucuronosyltransferase 1 family a, b [Source:ZFIN;Acc:ZDB-GENE-040426-2762]
ENSDARG00000006978	ZAK	sterile alpha motif and leucine zipper containing kinase AZK [Source:ZFIN;Acc:ZDB-GENE-070912-386]
ENSDARG00000014626	DLX3B	distal-less homeobox 3b [Source:ZFIN;Acc:ZDB-GENE-980526-280]
ENSDARG00000017034	SQRDL	sulfide quinone reductase-like (yeast) [Source:ZFIN;Acc:ZDB-GENE-050417-436]
ENSDARG00000020086	NUAK1A	NUAK family, SNF1-like kinase, 1a [Source:ZFIN;Acc:ZDB-GENE-041210-122]
ENSDARG00000023082	KRT1-19D	keratin, type 1, gene 19d [Source:ZFIN;Acc:ZDB-GENE-060316-1]
ENSDARG00000024775	SI:CH211-129C21.1	si:ch211-129c21.1 [Source:ZFIN;Acc:ZDB-GENE-030131-5796]
ENSDARG00000027088	PTGDSB.1	prostaglandin D2 synthase b, tandem duplicate 1 [Source:ZFIN;Acc:ZDB-GENE-030131-8436]
ENSDARG00000028012	TPMT.2	thiopurine S-methyltransferase, tandem duplicate 2 [Source:ZFIN;Acc:ZDB-GENE-041010-177]
ENSDARG00000030896	FOXQ1A	forkhead box Q1a [Source:ZFIN;Acc:ZDB-GENE-070424-74]
ENSDARG00000038729	S100Z	S100 calcium binding protein Z [Source:ZFIN;Acc:ZDB-GENE-050522-69]
ENSDARG00000043243	PRKCHB	protein kinase C, eta, b [Source:ZFIN;Acc:ZDB-GENE-041001-104]
ENSDARG00000043442	MAL	zgc:158773 [Source:ZFIN;Acc:ZDB-GENE-070424-9]
ENSDARG00000051925	CYB5R2	cytochrome b5 reductase 2 [Source:ZFIN;Acc:ZDB-GENE-060825-83]
ENSDARG00000052215	BTR02	bloodthirsty-related gene family, member 2 [Source:ZFIN;Acc:ZDB-GENE-060825-228]
ENSDARG00000055974	TPMT.1	thiopurine S-methyltransferase, tandem duplicate 1 [Source:ZFIN;Acc:ZDB-GENE-050522-141]
ENSDARG00000060439	CLCN2C	chloride channel 2c [Source:ZFIN;Acc:ZDB-GENE-050506-73]
ENSDARG00000061481	WU:FJ05G07	wu:fj05g07 [Source:ZFIN;Acc:ZDB-GENE-030131-7307]
ENSDARG00000061634	AIFM4	apoptosis-inducing factor, mitochondrion-associated, 4 [Source:ZFIN;Acc:ZDB-GENE-070112-2282]
ENSDARG00000061896	SLCO2A1	solute carrier organic anion transporter family, member 2A1 [Source:ZFIN;Acc:ZDB-GENE-060606-3]
ENSDARG00000063661	NUAK2	NUAK family, SNF1-like kinase, 2 [Source:ZFIN;Acc:ZDB-GENE-050208-563]
ENSDARG00000068934	CYP1B1	cytochrome P450, family 1, subfamily B, polypeptide 1 [Source:ZFIN;Acc:ZDB-GENE-030902-1]
ENSDARG00000070331	MUC5.1	mucin 5.1, oligomeric mucus/gel-forming [Source:ZFIN;Acc:ZDB-GENE-120822-1]
ENSDARG00000070578	EDN2	endothelin 2 [Source:ZFIN;Acc:ZDB-GENE-060503-774]
ENSDARG00000071173	SLC12A10.2	solute carrier family 12 (sodium/potassium/chloride transporters), member 10, tandem duplicate 2 [Source:ZFIN;Acc:ZDB-GENE-060503-425]
ENSDARG00000071567	TSTD1	si:dkey-34l15.1 [Source:ZFIN;Acc:ZDB-GENE-081107-63]
ENSDARG00000071626	PTGDSB.2	prostaglandin D2 synthase b, tandem duplicate 2 [Source:ZFIN;Acc:ZDB-GENE-030911-3]
ENSDARG00000074656	CTSS2.1	cathepsin S, ortholog2, tandem duplicate 1 [Source:ZFIN;Acc:ZDB-GENE-050522-559]
ENSDARG00000076830	SI:DKEY-65B12.6	si:dkey-65b12.6 [Source:ZFIN;Acc:ZDB-GENE-060526-329]
ENSDARG00000077559	CABZ01052290.1	N/A
ENSDARG00000078404	CDH26.1	cadherin 26, tandem duplicate 1 [Source:ZFIN;Acc:ZDB-GENE-100922-193]
ENSDARG00000078962	DUOX2	dual oxidase 2 [Source:ZFIN;Acc:ZDB-GENE-111007-1]
ENSDARG00000079119	SI:CH211-229D2.5	si:ch211-229d2.5 [Source:ZFIN;Acc:ZDB-GENE-121214-200]
ENSDARG00000079302	AND2	actinodin2 [Source:ZFIN;Acc:ZDB-GENE-041105-2]
ENSDARG00000086826	SULT6B1	sulfotransferase family, cytosolic, 6b, member 1 [Source:ZFIN;Acc:ZDB-GENE-050417-228]
ENSDARG00000089507	UGT1B5	UDP glucuronosyltransferase 1 family, polypeptide B5 [Source:ZFIN;Acc:ZDB-GENE-080227-14]
ENSDARG00000089697	NFE2L2B	nuclear factor, erythroid 2-like 2b [Source:ZFIN;Acc:ZDB-GENE-120320-3]
ENSDARG00000089936	SEPW2B	selenoprotein W, 2b [Source:ZFIN;Acc:ZDB-GENE-030428-2]
ENSDARG00000090268	KRTT1C19E	keratin type 1 c19e [Source:ZFIN;Acc:ZDB-GENE-050506-95]
ENSDARG00000091116	PKHD1L1	polycystic kidney and hepatic disease 1 (autosomal recessive)-like 1 [Source:ZFIN;Acc:ZDB-GENE-060503-475]
ENSDARG00000091715	SI:DKEY-162H11.2	si:dkey-162h11.2 [Source:ZFIN;Acc:ZDB-GENE-121214-90]
ENSDARG00000091996	SI:CH211-117M20.5	si:ch211-117m20.5 [Source:ZFIN;Acc:ZDB-GENE-030131-12]
ENSDARG00000093584	ZGC:193505	zgc:193505 [Source:ZFIN;Acc:ZDB-GENE-030131-7103]
ENSDARG00000097157	SI:CH211-207N23.2	si:ch211-207n23.2 [Source:ZFIN;Acc:ZDB-GENE-131121-310]
ENSDARG00000097491	UGT1B1	UDP glucuronosyltransferase 1 family, polypeptide B1 [Source:ZFIN;Acc:ZDB-GENE-080227-10]
ENSDARG00000098058	IM:7150988	im:7150988 [Source:ZFIN;Acc:ZDB-GENE-050309-169]
ENSDARG00000098315	CYP1A	cytochrome P450, family 1, subfamily A [Source:ZFIN;Acc:ZDB-GENE-011219-1]
ENSDARG00000098589	CYB5A	cytochrome b5 type A (microsomal) [Source:ZFIN;Acc:ZDB-GENE-040426-2148]
ENSDARG00000098746	DHRS13L1	dehydrogenase/reductase (SDR family) member 13 like 1 [Source:ZFIN;Acc:ZDB-GENE-040426-1907]
ENSDARG00000099702	CABZ01103755.1	N/A
ENSDARG00000100052	CCK	cholecystokinin [Source:HGNC Symbol;Acc:HGNC:1569]
ENSDARG00000101195	CYP1C1	cytochrome P450, family 1, subfamily C, polypeptide 1 [Source:ZFIN;Acc:ZDB-GENE-050522-501]
ENSDARG00000101364	WFIKKN1	WAP, follistatin/kazal, immunoglobulin, kunitz and netrin domain containing 1 [Source:ZFIN;Acc:ZDB-GENE-040426-2465]
ENSDARG00000101789	CYP1C2	cytochrome P450, family 1, subfamily C, polypeptide 2 [Source:ZFIN;Acc:ZDB-GENE-050705-1]
ENSDARG00000102558	PDE6H	phosphodiesterase 6H, cGMP-specific, cone, gamma [Source:ZFIN;Acc:ZDB-GENE-040426-1754]
ENSDARG00000103199	SI:DKEY-247K7.2	si:dkey-247k7.2 [Source:ZFIN;Acc:ZDB-GENE-031118-45]
ENSDARG00000103456	CYP2AA11	cytochrome P450, family 2, subfamily AA, polypeptide 11 [Source:ZFIN;Acc:ZDB-GENE-110114-3]
ENSDARG00000104068	GSTP1	glutathione S-transferase pi 1 [Source:ZFIN;Acc:ZDB-GENE-020806-4]
ENSDARG00000104292	CTGFB	connective tissue growth factor b [Source:ZFIN;Acc:ZDB-GENE-070705-82]
ENSDARG00000104973	WNT5A	wingless-type MMTV integration site family, member 5a [Source:ZFIN;Acc:ZDB-GENE-060328-3]
ENSDARG00000105411	SI:CH211-113D11.5	si:ch211-113d11.5 [Source:ZFIN;Acc:ZDB-GENE-030131-6391]

## Sheet: Carbozole
p-value	T	Q	Q&T	Q&T/Q	Q&T/T	term ID	t type	t group	t name	t depth	Q&T list
0.0201	14	17	3	0.176	0.214	HP:0007814	hp	5	Retinal pigment epithelial mottling	1	ENSDARG00000027495,ENSDARG00000034007,ENSDARG00000062661
0.0158	13	17	3	0.176	0.231	HP:0030329	hp	6	Retinal thinning	1	ENSDARG00000027495,ENSDARG00000034007,ENSDARG00000062661
0.0308	16	17	3	0.176	0.188	HP:0030500	hp	7	Yellow/white lesions of the macula	1	ENSDARG00000027495,ENSDARG00000034007,ENSDARG00000062661
0.00186	24	17	4	0.235	0.167	HP:0007722	hp	2	Retinal pigment epithelial atrophy	1	ENSDARG00000027236,ENSDARG00000027495,ENSDARG00000034007,ENSDARG00000062661
0.0122	12	17	3	0.176	0.25	HP:0007704	hp	4	Paroxysmal involuntary eye movements	1	ENSDARG00000027495,ENSDARG00000034007,ENSDARG00000062661
0.00311	62	17	5	0.294	0.081	HP:0000608	hp	8	Macular degeneration	1	ENSDARG00000027236,ENSDARG00000027495,ENSDARG00000034007,ENSDARG00000062661,ENSDARG00000076055
0.0358	19	15	2	0.133	0.105	KEGG:00100	keg	3	Steroid biosynthesis	1	ENSDARG00000079946,ENSDARG00000088140
ENSEMBL ID	GeneSymbol	Description
ENSDARG00000001721	OC90	otoconin 90 [Source:ZFIN;Acc:ZDB-GENE-070912-300]
ENSDARG00000001760	TNXBA	tenascin XBa [Source:ZFIN;Acc:ZDB-GENE-070103-5]
ENSDARG00000001993	MYHB	myosin, heavy chain b [Source:ZFIN;Acc:ZDB-GENE-081124-1]
ENSDARG00000004358	GNB3A	guanine nucleotide binding protein (G protein), beta polypeptide 3a [Source:ZFIN;Acc:ZDB-GENE-040718-134]
ENSDARG00000007788	ATP2B1B	ATPase, Ca++ transporting, plasma membrane 1b [Source:ZFIN;Acc:ZDB-GENE-080409-1]
ENSDARG00000007823	ATF3	activating transcription factor 3 [Source:ZFIN;Acc:ZDB-GENE-040426-728]
ENSDARG00000010658	INSIG1	insulin induced gene 1 [Source:ZFIN;Acc:ZDB-GENE-030131-6121]
ENSDARG00000011640	SYT5B	synaptotagmin Vb [Source:ZFIN;Acc:ZDB-GENE-050522-134]
ENSDARG00000012126	ZGC:109965	zgc:109965 [Source:ZFIN;Acc:ZDB-GENE-050913-21]
ENSDARG00000014233	SEPT8B	septin 8b [Source:ZFIN;Acc:ZDB-GENE-070424-3]
ENSDARG00000016854	NEUROD2	neurogenic differentiation 2 [Source:ZFIN;Acc:ZDB-GENE-010608-3]
ENSDARG00000019532	FADS2	fatty acid desaturase 2 [Source:ZFIN;Acc:ZDB-GENE-011212-1]
ENSDARG00000019902	RCVRN2	recoverin 2 [Source:ZFIN;Acc:ZDB-GENE-030131-7590]
ENSDARG00000024746	HSP90AA1.2	heat shock protein 90, alpha (cytosolic), class A member 1, tandem duplicate 2 [Source:ZFIN;Acc:ZDB-GENE-031001-3]
ENSDARG00000026759	LDLRB	low density lipoprotein receptor b [Source:ZFIN;Acc:ZDB-GENE-040426-1254]
ENSDARG00000027236	RS1A	retinoschisin 1a [Source:ZFIN;Acc:ZDB-GENE-040801-171]
ENSDARG00000027495	ELOVL4B	ELOVL fatty acid elongase 4b [Source:ZFIN;Acc:ZDB-GENE-030131-7672]
ENSDARG00000034007	PROM1B	prominin 1 b [Source:ZFIN;Acc:ZDB-GENE-031003-1]
ENSDARG00000036840	KRT15	keratin 15 [Source:ZFIN;Acc:ZDB-GENE-040426-2931]
ENSDARG00000037921	GNG13B	guanine nucleotide binding protein (G protein), gamma 13b [Source:ZFIN;Acc:ZDB-GENE-040718-97]
ENSDARG00000038025	CBX7A	chromobox homolog 7a [Source:ZFIN;Acc:ZDB-GENE-050417-400]
ENSDARG00000040252	ATP1A1A.5	ATPase, Na+/K+ transporting, alpha 1a polypeptide, tandem duplicate 5 [Source:ZFIN;Acc:ZDB-GENE-020501-1]
ENSDARG00000040284	SI:DKEY-79D12.5	si:dkey-79d12.5 [Source:ZFIN;Acc:ZDB-GENE-131127-429]
ENSDARG00000041382	SI:DKEY-283B15.2	si:dkey-283b15.2 [Source:ZFIN;Acc:ZDB-GENE-100921-93]
ENSDARG00000041394	DNAJB1B	DnaJ (Hsp40) homolog, subfamily B, member 1b [Source:ZFIN;Acc:ZDB-GENE-030131-5455]
ENSDARG00000042816	MMP9	matrix metallopeptidase 9 [Source:ZFIN;Acc:ZDB-GENE-040426-2132]
ENSDARG00000042872	ZDHHC8A	zinc finger, DHHC-type containing 8a [Source:ZFIN;Acc:ZDB-GENE-091118-26]
ENSDARG00000043806	POSTNA	periostin, osteoblast specific factor a [Source:ZFIN;Acc:ZDB-GENE-091113-23]
ENSDARG00000052700	SLC9B2	si:dkey-162b23.4 [Source:ZFIN;Acc:ZDB-GENE-110411-203]
ENSDARG00000053131	IRAK3	interleukin-1 receptor-associated kinase 3 [Source:ZFIN;Acc:ZDB-GENE-060503-710]
ENSDARG00000055253	SLC12A10.3	slc12a10.3 solute carrier family 12 (sodium/potassium/chloride transporters), member 10, tandem duplicate 3 [Source:ZFIN;Acc:ZDB-GENE-060503-518]
ENSDARG00000055294	ATOH1A	atonal bHLH transcription factor 1a [Source:ZFIN;Acc:ZDB-GENE-990415-17]
ENSDARG00000056036	STXBP1B	syntaxin binding protein 1b [Source:ZFIN;Acc:ZDB-GENE-060531-166]
ENSDARG00000056084	IGSF21B	immunoglobin superfamily, member 21b [Source:ZFIN;Acc:ZDB-GENE-070424-59]
ENSDARG00000060893	COL8A2	collagen, type VIII, alpha 2 [Source:ZFIN;Acc:ZDB-GENE-060503-488]
ENSDARG00000061274	LSS	lanosterol synthase (2,3-oxidosqualene-lanosterol cyclase) [Source:ZFIN;Acc:ZDB-GENE-050119-7]
ENSDARG00000061836	NFIXB	nuclear factor I/Xb [Source:ZFIN;Acc:ZDB-GENE-060421-5000]
ENSDARG00000062661	ABCA4B	ATP-binding cassette, sub-family A (ABC1), member 4b [Source:ZFIN;Acc:ZDB-GENE-050517-4]
ENSDARG00000074656	CTSS2.1	cathepsin S, ortholog2, tandem duplicate 1 [Source:ZFIN;Acc:ZDB-GENE-050522-559]
ENSDARG00000076055	RPGRIP1	retinitis pigmentosa GTPase regulator interacting protein 1 [Source:ZFIN;Acc:ZDB-GENE-091204-394]
ENSDARG00000078052	EMILIN3A	elastin microfibril interfacer 3a [Source:ZFIN;Acc:ZDB-GENE-080612-2]
ENSDARG00000078440	CCDC88AA	coiled-coil domain containing 88Aa [Source:ZFIN;Acc:ZDB-GENE-100701-2]
ENSDARG00000078527	LINGO4B	leucine rich repeat and Ig domain containing 4b [Source:ZFIN;Acc:ZDB-GENE-091214-3]
ENSDARG00000079946	SQLEA	squalene epoxidase a [Source:ZFIN;Acc:ZDB-GENE-071004-98]
ENSDARG00000088140	HSD17B7	hydroxysteroid (17-beta) dehydrogenase 7 [Source:ZFIN;Acc:ZDB-GENE-061013-378]
ENSDARG00000091234	SI:CH73-335L21.4	si:ch73-335l21.4 [Source:ZFIN;Acc:ZDB-GENE-160728-105]
ENSDARG00000092269	SI:DKEYP-41F9.4	si:dkeyp-41f9.4 [Source:ZFIN;Acc:ZDB-GENE-091204-320]
ENSDARG00000094559	ZGC:174855	zgc:174855 [Source:ZFIN;Acc:ZDB-GENE-071004-74]
ENSDARG00000096313	BX537277.4	N/A
ENSDARG00000097613	IGFN1.3	immunoglobulin-like and fibronectin type III domain containing 1, tandem duplicate 3 [Source:ZFIN;Acc:ZDB-GENE-131122-44]
ENSDARG00000099336	MVDA	mevalonate (diphospho) decarboxylase a [Source:ZFIN;Acc:ZDB-GENE-041114-127]
ENSDARG00000099351	IGFBP1A	insulin-like growth factor binding protein 1a [Source:ZFIN;Acc:ZDB-GENE-021231-1]
ENSDARG00000102393	ARL3L1	ADP-ribosylation factor-like 3, like 1 [Source:ZFIN;Acc:ZDB-GENE-040426-1649]
ENSDARG00000103413	ZGC:109949	zgc:109949 [Source:ZFIN;Acc:ZDB-GENE-050522-166]
ENSDARG00000104773	JUNBB	jun B proto-oncogene b [Source:ZFIN;Acc:ZDB-GENE-040426-2666]

## Sheet: DbaiP
p-value	T	Q	Q&T	Q&T/Q	Q&T/T	term ID	t type	t group	t name	t depth	Q&T list
0.00602	67	38	4	0.105	0.06	GO:0006979	BP	6	response to oxidative stress	1	ENSDARG00000034503,ENSDARG00000045768,ENSDARG00000056885,ENSDARG00000089697
0.00509	19	38	3	0.079	0.158	GO:0000302	BP	6	response to reactive oxygen species	2	ENSDARG00000034503,ENSDARG00000045768,ENSDARG00000056885
5.34e-05	5	38	3	0.079	0.6	GO:0042542	BP	6	response to hydrogen peroxide	1	ENSDARG00000034503,ENSDARG00000045768,ENSDARG00000056885
0.0419	221	38	5	0.132	0.023	GO:0045892	BP	5	negative regulation of transcription, DNA-templated	1	ENSDARG00000015495,ENSDARG00000045768,ENSDARG00000052618,ENSDARG00000089697,ENSDARG00000099702
0.0372	106	38	4	0.105	0.038	GO:0000122	BP	5	negative regulation of transcription from RNA polymerase II promoter	1	ENSDARG00000015495,ENSDARG00000052618,ENSDARG00000089697,ENSDARG00000099702
0.00983	3	38	2	0.053	0.667	GO:0009649	BP	15	entrainment of circadian clock	1	ENSDARG00000034503,ENSDARG00000045768
0.0217	692	38	8	0.211	0.012	GO:0009892	BP	9	negative regulation of metabolic process	1	ENSDARG00000015495,ENSDARG00000019949,ENSDARG00000045768,ENSDARG00000052618,ENSDARG00000070331,ENSDARG00000089697,ENSDARG00000099702,ENSDARG00000101364
0.0157	662	38	8	0.211	0.012	GO:0010605	BP	9	negative regulation of macromolecule metabolic process	2	ENSDARG00000015495,ENSDARG00000019949,ENSDARG00000045768,ENSDARG00000052618,ENSDARG00000070331,ENSDARG00000089697,ENSDARG00000099702,ENSDARG00000101364
0.00889	612	38	8	0.211	0.013	GO:0051172	BP	9	negative regulation of nitrogen compound metabolic process	1	ENSDARG00000015495,ENSDARG00000019949,ENSDARG00000045768,ENSDARG00000052618,ENSDARG00000070331,ENSDARG00000089697,ENSDARG00000099702,ENSDARG00000101364
0.0104	625	38	8	0.211	0.013	GO:0031324	BP	9	negative regulation of cellular metabolic process	1	ENSDARG00000015495,ENSDARG00000019949,ENSDARG00000045768,ENSDARG00000052618,ENSDARG00000070331,ENSDARG00000089697,ENSDARG00000099702,ENSDARG00000101364
0.000307	1384	38	13	0.342	0.009	GO:0042221	BP	4	response to chemical	1	ENSDARG00000003820,ENSDARG00000006220,ENSDARG00000030896,ENSDARG00000034503,ENSDARG00000045768,ENSDARG00000052618,ENSDARG00000056885,ENSDARG00000058606,ENSDARG00000068934,ENSDARG00000086826,ENSDARG00000089697,ENSDARG00000098315,ENSDARG00000099702
1.7e-09	47	38	7	0.184	0.149	GO:0009410	BP	4	response to xenobiotic stimulus	2	ENSDARG00000006220,ENSDARG00000030896,ENSDARG00000052618,ENSDARG00000068934,ENSDARG00000086826,ENSDARG00000098315,ENSDARG00000099702
5.48e-06	37	38	5	0.132	0.135	GO:0071466	BP	4	cellular response to xenobiotic stimulus	1	ENSDARG00000006220,ENSDARG00000052618,ENSDARG00000068934,ENSDARG00000086826,ENSDARG00000098315
0.0198	189	38	5	0.132	0.026	GO:0005506	MF	13	iron ion binding	1	ENSDARG00000056587,ENSDARG00000068934,ENSDARG00000098315,ENSDARG00000101195,ENSDARG00000103456
0.0144	177	38	5	0.132	0.028	GO:0016705	MF	2	oxidoreductase activity, acting on paired donors, with incorporation or reduction of molecular oxygen	1	ENSDARG00000056587,ENSDARG00000068934,ENSDARG00000098315,ENSDARG00000101195,ENSDARG00000103456
0.00385	135	38	5	0.132	0.037	GO:0004497	MF	2	monooxygenase activity	1	ENSDARG00000056587,ENSDARG00000068934,ENSDARG00000098315,ENSDARG00000101195,ENSDARG00000103456
0.0152	27	38	3	0.079	0.111	GO:0016712	MF	2	oxidoreductase activity, acting on paired donors, with incorporation or reduction of molecular oxygen, reduced flavin or flavoprotein as one donor, and incorporation of one atom of oxygen	2	ENSDARG00000068934,ENSDARG00000098315,ENSDARG00000103456
0.00983	3	38	2	0.053	0.667	GO:0070330	MF	2	aromatase activity	3	ENSDARG00000068934,ENSDARG00000098315
0.00711	153	38	5	0.132	0.033	GO:0046906	MF	16	tetrapyrrole binding	1	ENSDARG00000056587,ENSDARG00000068934,ENSDARG00000098315,ENSDARG00000101195,ENSDARG00000103456
0.00645	150	38	5	0.132	0.033	GO:0020037	MF	16	heme binding	2	ENSDARG00000056587,ENSDARG00000068934,ENSDARG00000098315,ENSDARG00000101195,ENSDARG00000103456
0.0455	33	10	3	0.3	0.091	HP:0100021	hp	14	Cerebral palsy	1	ENSDARG00000006220,ENSDARG00000061896,ENSDARG00000097491
0.000542	33	9	3	0.333	0.091	KEGG:00140	keg	10	Steroid hormone biosynthesis	1	ENSDARG00000006220,ENSDARG00000068934,ENSDARG00000098315
0.000649	35	9	3	0.333	0.086	KEGG:00980	keg	7	Metabolism of xenobiotics by cytochrome P450	1	ENSDARG00000006220,ENSDARG00000068934,ENSDARG00000098315
ENSEMBL ID	GeneSymbol	Description
ENSDARG00000003820	NR1D2A	nuclear receptor subfamily 1, group D, member 2a [Source:ZFIN;Acc:ZDB-GENE-040504-1]
ENSDARG00000006220	UGT1AB	UDP glucuronosyltransferase 1 family a, b [Source:ZFIN;Acc:ZDB-GENE-040426-2762]
ENSDARG00000015495	KLF3	Kruppel-like factor 3 (basic) [Source:ZFIN;Acc:ZDB-GENE-011116-1]
ENSDARG00000019949	SERPINH1B	serpin peptidase inhibitor, clade H (heat shock protein 47), member 1b [Source:ZFIN;Acc:ZDB-GENE-990415-93]
ENSDARG00000027088	PTGDSB.1	prostaglandin D2 synthase b, tandem duplicate 1 [Source:ZFIN;Acc:ZDB-GENE-030131-8436]
ENSDARG00000028396	FKBP5	FK506 binding protein 5 [Source:ZFIN;Acc:ZDB-GENE-030616-630]
ENSDARG00000029075	PFKFB4B	6-phosphofructo-2-kinase/fructose-2,6-biphosphatase 4b [Source:ZFIN;Acc:ZDB-GENE-031031-4]
ENSDARG00000030896	FOXQ1A	forkhead box Q1a [Source:ZFIN;Acc:ZDB-GENE-070424-74]
ENSDARG00000034503	PER2	period circadian clock 2 [Source:ZFIN;Acc:ZDB-GENE-011220-2]
ENSDARG00000043243	PRKCHB	protein kinase C, eta, b [Source:ZFIN;Acc:ZDB-GENE-041001-104]
ENSDARG00000045768	CRY1AA	cryptochrome circadian clock 1aa [Source:ZFIN;Acc:ZDB-GENE-010426-2]
ENSDARG00000052618	AHRRB	aryl-hydrocarbon receptor repressor b [Source:ZFIN;Acc:ZDB-GENE-051018-2]
ENSDARG00000056587	CYP2R1	cytochrome P450, family 2, subfamily R, polypeptide 1 [Source:ZFIN;Acc:ZDB-GENE-110114-1]
ENSDARG00000056885	PER1A	period circadian clock 1a [Source:ZFIN;Acc:ZDB-GENE-011220-1]
ENSDARG00000058606	SIK1	salt-inducible kinase 1 [Source:ZFIN;Acc:ZDB-GENE-030131-9446]
ENSDARG00000058679	ZGC:114104	zgc:114104 [Source:ZFIN;Acc:ZDB-GENE-050913-63]
ENSDARG00000059001	PIM2	Pim-2 proto-oncogene, serine/threonine kinase [Source:ZFIN;Acc:ZDB-GENE-000831-6]
ENSDARG00000061481	WU:FJ05G07	wu:fj05g07 [Source:ZFIN;Acc:ZDB-GENE-030131-7307]
ENSDARG00000061896	SLCO2A1	solute carrier organic anion transporter family, member 2A1 [Source:ZFIN;Acc:ZDB-GENE-060606-3]
ENSDARG00000068194	KLF9	Kruppel-like factor 9 [Source:ZFIN;Acc:ZDB-GENE-060526-244]
ENSDARG00000068934	CYP1B1	cytochrome P450, family 1, subfamily B, polypeptide 1 [Source:ZFIN;Acc:ZDB-GENE-030902-1]
ENSDARG00000070331	MUC5.1	mucin 5.1, oligomeric mucus/gel-forming [Source:ZFIN;Acc:ZDB-GENE-120822-1]
ENSDARG00000071567	TSTD1	si:dkey-34l15.1 [Source:ZFIN;Acc:ZDB-GENE-081107-63]
ENSDARG00000074752	HLFA	hepatic leukemia factor a [Source:ZFIN;Acc:ZDB-GENE-061013-159]
ENSDARG00000076830	SI:DKEY-65B12.6	si:dkey-65b12.6 [Source:ZFIN;Acc:ZDB-GENE-060526-329]
ENSDARG00000077236	HSPB6	heat shock protein, alpha-crystallin-related, b6 [Source:ZFIN;Acc:ZDB-GENE-080214-7]
ENSDARG00000077559	CABZ01052290.1	N/A
ENSDARG00000078567	LONRF1L	LON peptidase N-terminal domain and ring finger 1, like [Source:ZFIN;Acc:ZDB-GENE-081104-397]
ENSDARG00000079119	SI:CH211-229D2.5	si:ch211-229d2.5 [Source:ZFIN;Acc:ZDB-GENE-121214-200]
ENSDARG00000086826	SULT6B1	sulfotransferase family, cytosolic, 6b, member 1 [Source:ZFIN;Acc:ZDB-GENE-050417-228]
ENSDARG00000089697	NFE2L2B	nuclear factor, erythroid 2-like 2b [Source:ZFIN;Acc:ZDB-GENE-120320-3]
ENSDARG00000091116	PKHD1L1	polycystic kidney and hepatic disease 1 (autosomal recessive)-like 1 [Source:ZFIN;Acc:ZDB-GENE-060503-475]
ENSDARG00000093237	SI:CH211-89O9.4	si:ch211-89o9.4 [Source:ZFIN;Acc:ZDB-GENE-090313-134]
ENSDARG00000097491	UGT1B1	UDP glucuronosyltransferase 1 family, polypeptide B1 [Source:ZFIN;Acc:ZDB-GENE-080227-10]
ENSDARG00000098315	CYP1A	cytochrome P450, family 1, subfamily A [Source:ZFIN;Acc:ZDB-GENE-011219-1]
ENSDARG00000098746	DHRS13L1	dehydrogenase/reductase (SDR family) member 13 like 1 [Source:ZFIN;Acc:ZDB-GENE-040426-1907]
ENSDARG00000099702	CABZ01103755.1	N/A
ENSDARG00000101195	CYP1C1	cytochrome P450, family 1, subfamily C, polypeptide 1 [Source:ZFIN;Acc:ZDB-GENE-050522-501]
ENSDARG00000101364	WFIKKN1	WAP, follistatin/kazal, immunoglobulin, kunitz and netrin domain containing 1 [Source:ZFIN;Acc:ZDB-GENE-040426-2465]
ENSDARG00000102558	PDE6H	phosphodiesterase 6H, cGMP-specific, cone, gamma [Source:ZFIN;Acc:ZDB-GENE-040426-1754]
ENSDARG00000103199	SI:DKEY-247K7.2	si:dkey-247k7.2 [Source:ZFIN;Acc:ZDB-GENE-031118-45]
ENSDARG00000103456	CYP2AA11	cytochrome P450, family 2, subfamily AA, polypeptide 11 [Source:ZFIN;Acc:ZDB-GENE-110114-3]
ENSDARG00000105341	SI:DKEY-9L20.3	si:dkey-9l20.3 [Source:ZFIN;Acc:ZDB-GENE-090313-369]
ENSDARG00000105863	FO904970.1	N/A

## Sheet: DbahP
p-value	T	Q	Q&T	Q&T/Q	Q&T/T	term ID	t type	t group	t name	t depth	Q&T list
0.00901	5309	210	79	0.376	0.015	GO:0050896	BP	1	response to stimulus	1	ENSDARG00000001968,ENSDARG00000002231,ENSDARG00000006220,ENSDARG00000008372,ENSDARG00000009493,ENSDARG00000013828,ENSDARG00000016667,ENSDARG00000017220,ENSDARG00000018716,ENSDARG00000018773,ENSDARG00000020057,ENSDARG00000021305,ENSDARG00000022101,ENSDARG00000025299,ENSDARG00000027497,ENSDARG00000027777,ENSDARG00000030896,ENSDARG00000032761,ENSDARG00000032990,ENSDARG00000033498,ENSDARG00000035133,…
0.000952	4151	210	69	0.329	0.017	GO:0023052	BP	1	signaling	1	ENSDARG00000001968,ENSDARG00000002231,ENSDARG00000008372,ENSDARG00000009493,ENSDARG00000013828,ENSDARG00000014169,ENSDARG00000016667,ENSDARG00000017220,ENSDARG00000018716,ENSDARG00000018773,ENSDARG00000020057,ENSDARG00000022101,ENSDARG00000025299,ENSDARG00000027497,ENSDARG00000027777,ENSDARG00000032761,ENSDARG00000032990,ENSDARG00000033498,ENSDARG00000035308,ENSDARG00000036998,ENSDARG00000043243,…
2.51e-05	4200	210	74	0.352	0.018	GO:0007154	BP	1	cell communication	1	ENSDARG00000001968,ENSDARG00000002231,ENSDARG00000004931,ENSDARG00000008372,ENSDARG00000009493,ENSDARG00000013828,ENSDARG00000014169,ENSDARG00000016667,ENSDARG00000017220,ENSDARG00000018716,ENSDARG00000018773,ENSDARG00000020057,ENSDARG00000022101,ENSDARG00000025299,ENSDARG00000027497,ENSDARG00000027777,ENSDARG00000032761,ENSDARG00000032990,ENSDARG00000033498,ENSDARG00000035308,ENSDARG00000036998,…
0.000928	4406	210	72	0.343	0.016	GO:0051716	BP	1	cellular response to stimulus	1	ENSDARG00000001968,ENSDARG00000002231,ENSDARG00000006220,ENSDARG00000008372,ENSDARG00000009493,ENSDARG00000013828,ENSDARG00000016667,ENSDARG00000017220,ENSDARG00000018716,ENSDARG00000018773,ENSDARG00000020057,ENSDARG00000022101,ENSDARG00000025299,ENSDARG00000027497,ENSDARG00000027777,ENSDARG00000032761,ENSDARG00000032990,ENSDARG00000033498,ENSDARG00000035308,ENSDARG00000036998,ENSDARG00000043243,…
0.00978	3903	210	63	0.3	0.016	GO:0007165	BP	1	signal transduction	2	ENSDARG00000001968,ENSDARG00000002231,ENSDARG00000008372,ENSDARG00000009493,ENSDARG00000013828,ENSDARG00000016667,ENSDARG00000017220,ENSDARG00000018716,ENSDARG00000018773,ENSDARG00000020057,ENSDARG00000022101,ENSDARG00000025299,ENSDARG00000027497,ENSDARG00000027777,ENSDARG00000032761,ENSDARG00000032990,ENSDARG00000033498,ENSDARG00000035308,ENSDARG00000036998,ENSDARG00000043243,ENSDARG00000045094,…
0.0236	1240	210	28	0.133	0.023	GO:0035556	BP	1	intracellular signal transduction	3	ENSDARG00000001968,ENSDARG00000009493,ENSDARG00000018716,ENSDARG00000022101,ENSDARG00000027497,ENSDARG00000027777,ENSDARG00000036998,ENSDARG00000043243,ENSDARG00000057903,ENSDARG00000058565,ENSDARG00000058606,ENSDARG00000058702,ENSDARG00000060551,ENSDARG00000060597,ENSDARG00000061699,ENSDARG00000062884,ENSDARG00000069958,ENSDARG00000074905,ENSDARG00000076213,ENSDARG00000076292,ENSDARG00000077656,…
0.00855	450	210	16	0.076	0.036	GO:0043087	BP	6	regulation of GTPase activity	1	ENSDARG00000001968,ENSDARG00000013828,ENSDARG00000022101,ENSDARG00000028857,ENSDARG00000032990,ENSDARG00000043627,ENSDARG00000060309,ENSDARG00000061699,ENSDARG00000076213,ENSDARG00000077656,ENSDARG00000078775,ENSDARG00000078979,ENSDARG00000079742,ENSDARG00000087822,ENSDARG00000098761,ENSDARG00000100402
0.0167	422	210	15	0.071	0.036	GO:0043547	BP	6	positive regulation of GTPase activity	1	ENSDARG00000001968,ENSDARG00000013828,ENSDARG00000022101,ENSDARG00000028857,ENSDARG00000043627,ENSDARG00000060309,ENSDARG00000061699,ENSDARG00000076213,ENSDARG00000077656,ENSDARG00000078775,ENSDARG00000078979,ENSDARG00000079742,ENSDARG00000087822,ENSDARG00000098761,ENSDARG00000100402
0.0215	194	210	10	0.048	0.052	GO:0072511	BP	2	divalent inorganic cation transport	1	ENSDARG00000004931,ENSDARG00000008398,ENSDARG00000021305,ENSDARG00000046079,ENSDARG00000055154,ENSDARG00000057903,ENSDARG00000079295,ENSDARG00000086224,ENSDARG00000100592,ENSDARG00000102773
0.00924	506	210	17	0.081	0.034	GO:0030001	BP	2	metal ion transport	1	ENSDARG00000004931,ENSDARG00000008398,ENSDARG00000021305,ENSDARG00000046079,ENSDARG00000055154,ENSDARG00000057903,ENSDARG00000060085,ENSDARG00000060095,ENSDARG00000062687,ENSDARG00000073743,ENSDARG00000078187,ENSDARG00000079295,ENSDARG00000079491,ENSDARG00000086224,ENSDARG00000091130,ENSDARG00000100592,ENSDARG00000102773
0.0215	194	210	10	0.048	0.052	GO:0070838	BP	2	divalent metal ion transport	2	ENSDARG00000004931,ENSDARG00000008398,ENSDARG00000021305,ENSDARG00000046079,ENSDARG00000055154,ENSDARG00000057903,ENSDARG00000079295,ENSDARG00000086224,ENSDARG00000100592,ENSDARG00000102773
0.0348	164	210	9	0.043	0.055	GO:0006816	BP	2	calcium ion transport	3	ENSDARG00000004931,ENSDARG00000008398,ENSDARG00000046079,ENSDARG00000055154,ENSDARG00000057903,ENSDARG00000079295,ENSDARG00000086224,ENSDARG00000100592,ENSDARG00000102773
0.00858	1107	210	27	0.129	0.024	GO:0006811	BP	15	ion transport	1	ENSDARG00000004931,ENSDARG00000008398,ENSDARG00000010565,ENSDARG00000016439,ENSDARG00000017365,ENSDARG00000019963,ENSDARG00000021305,ENSDARG00000043646,ENSDARG00000046079,ENSDARG00000053665,ENSDARG00000055154,ENSDARG00000057903,ENSDARG00000060085,ENSDARG00000060095,ENSDARG00000061896,ENSDARG00000062687,ENSDARG00000068787,ENSDARG00000070214,ENSDARG00000073743,ENSDARG00000078187,ENSDARG00000079295,…
0.0354	1199	210	27	0.129	0.023	GO:0055085	BP	15	transmembrane transport	1	ENSDARG00000004931,ENSDARG00000008398,ENSDARG00000010565,ENSDARG00000016439,ENSDARG00000017365,ENSDARG00000019963,ENSDARG00000021305,ENSDARG00000043646,ENSDARG00000046079,ENSDARG00000053665,ENSDARG00000054690,ENSDARG00000055154,ENSDARG00000057903,ENSDARG00000060085,ENSDARG00000060095,ENSDARG00000062687,ENSDARG00000068787,ENSDARG00000070214,ENSDARG00000073743,ENSDARG00000078187,ENSDARG00000079295,…
0.000181	846	210	26	0.124	0.031	GO:0034220	BP	15	ion transmembrane transport	2	ENSDARG00000004931,ENSDARG00000008398,ENSDARG00000010565,ENSDARG00000016439,ENSDARG00000017365,ENSDARG00000019963,ENSDARG00000021305,ENSDARG00000043646,ENSDARG00000046079,ENSDARG00000053665,ENSDARG00000055154,ENSDARG00000057903,ENSDARG00000060085,ENSDARG00000060095,ENSDARG00000062687,ENSDARG00000068787,ENSDARG00000070214,ENSDARG00000073743,ENSDARG00000078187,ENSDARG00000079295,ENSDARG00000079491,…
0.0388	566	210	17	0.081	0.03	GO:0098660	BP	15	inorganic ion transmembrane transport	3	ENSDARG00000004931,ENSDARG00000008398,ENSDARG00000021305,ENSDARG00000046079,ENSDARG00000055154,ENSDARG00000057903,ENSDARG00000060085,ENSDARG00000060095,ENSDARG00000062687,ENSDARG00000073743,ENSDARG00000078187,ENSDARG00000079295,ENSDARG00000079491,ENSDARG00000086224,ENSDARG00000091130,ENSDARG00000100592,ENSDARG00000102773
0.0229	600	210	18	0.086	0.03	GO:0098655	BP	15	cation transmembrane transport	3	ENSDARG00000004931,ENSDARG00000008398,ENSDARG00000021305,ENSDARG00000046079,ENSDARG00000055154,ENSDARG00000057903,ENSDARG00000060085,ENSDARG00000060095,ENSDARG00000062687,ENSDARG00000070214,ENSDARG00000073743,ENSDARG00000078187,ENSDARG00000079295,ENSDARG00000079491,ENSDARG00000086224,ENSDARG00000091130,ENSDARG00000100592,ENSDARG00000102773
0.00901	505	210	17	0.081	0.034	GO:0098662	BP	15	inorganic cation transmembrane transport	4	ENSDARG00000004931,ENSDARG00000008398,ENSDARG00000021305,ENSDARG00000046079,ENSDARG00000055154,ENSDARG00000057903,ENSDARG00000060085,ENSDARG00000060095,ENSDARG00000062687,ENSDARG00000073743,ENSDARG00000078187,ENSDARG00000079295,ENSDARG00000079491,ENSDARG00000086224,ENSDARG00000091130,ENSDARG00000100592,ENSDARG00000102773
0.0163	7972	210	106	0.505	0.013	GO:0065007	BP	3	biological regulation	1	ENSDARG00000001968,ENSDARG00000002231,ENSDARG00000005915,ENSDARG00000008372,ENSDARG00000008398,ENSDARG00000009493,ENSDARG00000012586,ENSDARG00000013828,ENSDARG00000014169,ENSDARG00000016667,ENSDARG00000016788,ENSDARG00000017220,ENSDARG00000018716,ENSDARG00000018773,ENSDARG00000020057,ENSDARG00000021305,ENSDARG00000022101,ENSDARG00000025299,ENSDARG00000027082,ENSDARG00000027497,ENSDARG00000027777,…
0.0134	7350	210	100	0.476	0.014	GO:0050789	BP	3	regulation of biological process	1	ENSDARG00000001968,ENSDARG00000002231,ENSDARG00000005915,ENSDARG00000008372,ENSDARG00000008398,ENSDARG00000009493,ENSDARG00000012586,ENSDARG00000013828,ENSDARG00000014169,ENSDARG00000016667,ENSDARG00000016788,ENSDARG00000017220,ENSDARG00000018716,ENSDARG00000018773,ENSDARG00000020057,ENSDARG00000021305,ENSDARG00000022101,ENSDARG00000025299,ENSDARG00000027082,ENSDARG00000027497,ENSDARG00000027777,…
1.64e-05	47	210	8	0.038	0.17	GO:0009410	BP	11	response to xenobiotic stimulus	1	ENSDARG00000006220,ENSDARG00000030896,ENSDARG00000052618,ENSDARG00000068934,ENSDARG00000086826,ENSDARG00000098315,ENSDARG00000099702,ENSDARG00000104068
0.00153	37	210	6	0.029	0.162	GO:0071466	BP	11	cellular response to xenobiotic stimulus	2	ENSDARG00000006220,ENSDARG00000052618,ENSDARG00000068934,ENSDARG00000086826,ENSDARG00000098315,ENSDARG00000104068
0.0383	2399	210	43	0.205	0.018	GO:0071944	CC	13	cell periphery	1	ENSDARG00000002231,ENSDARG00000008398,ENSDARG00000010565,ENSDARG00000013072,ENSDARG00000014169,ENSDARG00000018896,ENSDARG00000021305,ENSDARG00000025299,ENSDARG00000033840,ENSDARG00000043646,ENSDARG00000046079,ENSDARG00000053326,ENSDARG00000053665,ENSDARG00000057903,ENSDARG00000058259,ENSDARG00000059090,ENSDARG00000060085,ENSDARG00000060095,ENSDARG00000060597,ENSDARG00000061896,ENSDARG00000062687,…
0.0233	2350	210	43	0.205	0.018	GO:0005886	CC	13	plasma membrane	1	ENSDARG00000002231,ENSDARG00000008398,ENSDARG00000010565,ENSDARG00000013072,ENSDARG00000014169,ENSDARG00000018896,ENSDARG00000021305,ENSDARG00000025299,ENSDARG00000033840,ENSDARG00000043646,ENSDARG00000046079,ENSDARG00000053326,ENSDARG00000053665,ENSDARG00000057903,ENSDARG00000058259,ENSDARG00000059090,ENSDARG00000060085,ENSDARG00000060095,ENSDARG00000060597,ENSDARG00000061896,ENSDARG00000062687,…
0.0362	1411	210	30	0.143	0.021	GO:0044459	CC	13	plasma membrane part	2	ENSDARG00000002231,ENSDARG00000008398,ENSDARG00000010565,ENSDARG00000013072,ENSDARG00000018896,ENSDARG00000025299,ENSDARG00000043646,ENSDARG00000046079,ENSDARG00000053326,ENSDARG00000059090,ENSDARG00000060085,ENSDARG00000060095,ENSDARG00000061896,ENSDARG00000062687,ENSDARG00000062974,ENSDARG00000068787,ENSDARG00000077474,ENSDARG00000077761,ENSDARG00000078775,ENSDARG00000079295,ENSDARG00000079491,…
0.0348	164	210	9	0.043	0.055	GO:0034702	CC	5	ion channel complex	1	ENSDARG00000008398,ENSDARG00000046079,ENSDARG00000060085,ENSDARG00000060095,ENSDARG00000079295,ENSDARG00000079491,ENSDARG00000091130,ENSDARG00000101713,ENSDARG00000102773
0.0024	118	210	9	0.043	0.076	GO:0034703	CC	5	cation channel complex	2	ENSDARG00000008398,ENSDARG00000046079,ENSDARG00000060085,ENSDARG00000060095,ENSDARG00000079295,ENSDARG00000079491,ENSDARG00000091130,ENSDARG00000101713,ENSDARG00000102773
0.0267	1112	210	26	0.124	0.023	GO:0022892	MF	8	substrate-specific transporter activity	1	ENSDARG00000004931,ENSDARG00000008398,ENSDARG00000010565,ENSDARG00000016439,ENSDARG00000017365,ENSDARG00000019963,ENSDARG00000021305,ENSDARG00000043646,ENSDARG00000046079,ENSDARG00000053665,ENSDARG00000055154,ENSDARG00000060085,ENSDARG00000060095,ENSDARG00000061896,ENSDARG00000062687,ENSDARG00000068787,ENSDARG00000070214,ENSDARG00000073743,ENSDARG00000078187,ENSDARG00000079295,ENSDARG00000079491,…
0.00692	1094	210	27	0.129	0.025	GO:0022857	MF	8	transmembrane transporter activity	1	ENSDARG00000004931,ENSDARG00000008398,ENSDARG00000010565,ENSDARG00000016439,ENSDARG00000017365,ENSDARG00000019963,ENSDARG00000021305,ENSDARG00000043646,ENSDARG00000046079,ENSDARG00000053665,ENSDARG00000054690,ENSDARG00000055154,ENSDARG00000060085,ENSDARG00000060095,ENSDARG00000061896,ENSDARG00000062687,ENSDARG00000068787,ENSDARG00000070214,ENSDARG00000073743,ENSDARG00000078187,ENSDARG00000079295,…
0.00287	980	210	26	0.124	0.027	GO:0022891	MF	8	substrate-specific transmembrane transporter activity	2	ENSDARG00000004931,ENSDARG00000008398,ENSDARG00000010565,ENSDARG00000016439,ENSDARG00000017365,ENSDARG00000019963,ENSDARG00000021305,ENSDARG00000043646,ENSDARG00000046079,ENSDARG00000053665,ENSDARG00000055154,ENSDARG00000060085,ENSDARG00000060095,ENSDARG00000061896,ENSDARG00000062687,ENSDARG00000068787,ENSDARG00000070214,ENSDARG00000073743,ENSDARG00000078187,ENSDARG00000079295,ENSDARG00000079491,…
0.00272	915	210	25	0.119	0.027	GO:0015075	MF	8	ion transmembrane transporter activity	3	ENSDARG00000004931,ENSDARG00000008398,ENSDARG00000016439,ENSDARG00000017365,ENSDARG00000019963,ENSDARG00000021305,ENSDARG00000043646,ENSDARG00000046079,ENSDARG00000053665,ENSDARG00000055154,ENSDARG00000060085,ENSDARG00000060095,ENSDARG00000061896,ENSDARG00000062687,ENSDARG00000068787,ENSDARG00000070214,ENSDARG00000073743,ENSDARG00000078187,ENSDARG00000079295,ENSDARG00000079491,ENSDARG00000086224,…
0.00584	654	210	20	0.095	0.031	GO:0008324	MF	8	cation transmembrane transporter activity	4	ENSDARG00000004931,ENSDARG00000008398,ENSDARG00000017365,ENSDARG00000021305,ENSDARG00000043646,ENSDARG00000046079,ENSDARG00000055154,ENSDARG00000060085,ENSDARG00000060095,ENSDARG00000062687,ENSDARG00000068787,ENSDARG00000070214,ENSDARG00000073743,ENSDARG00000078187,ENSDARG00000079295,ENSDARG00000079491,ENSDARG00000086224,ENSDARG00000091130,ENSDARG00000100592,ENSDARG00000102773
0.00149	544	210	19	0.09	0.035	GO:0022890	MF	8	inorganic cation transmembrane transporter activity	5	ENSDARG00000004931,ENSDARG00000008398,ENSDARG00000017365,ENSDARG00000021305,ENSDARG00000043646,ENSDARG00000046079,ENSDARG00000055154,ENSDARG00000060085,ENSDARG00000060095,ENSDARG00000062687,ENSDARG00000068787,ENSDARG00000073743,ENSDARG00000078187,ENSDARG00000079295,ENSDARG00000079491,ENSDARG00000086224,ENSDARG00000091130,ENSDARG00000100592,ENSDARG00000102773
0.0154	148	210	9	0.043	0.061	GO:0072509	MF	8	divalent inorganic cation transmembrane transporter activity	6	ENSDARG00000004931,ENSDARG00000008398,ENSDARG00000021305,ENSDARG00000046079,ENSDARG00000055154,ENSDARG00000079295,ENSDARG00000086224,ENSDARG00000100592,ENSDARG00000102773
4.71e-05	434	210	19	0.09	0.044	GO:0046873	MF	8	metal ion transmembrane transporter activity	6	ENSDARG00000004931,ENSDARG00000008398,ENSDARG00000017365,ENSDARG00000021305,ENSDARG00000043646,ENSDARG00000046079,ENSDARG00000055154,ENSDARG00000060085,ENSDARG00000060095,ENSDARG00000062687,ENSDARG00000068787,ENSDARG00000073743,ENSDARG00000078187,ENSDARG00000079295,ENSDARG00000079491,ENSDARG00000086224,ENSDARG00000091130,ENSDARG00000100592,ENSDARG00000102773
0.0257	121	210	8	0.038	0.066	GO:0015085	MF	8	calcium ion transmembrane transporter activity	7	ENSDARG00000004931,ENSDARG00000008398,ENSDARG00000046079,ENSDARG00000055154,ENSDARG00000079295,ENSDARG00000086224,ENSDARG00000100592,ENSDARG00000102773
0.0485	97	210	7	0.033	0.072	GO:0008194	MF	10	UDP-glycosyltransferase activity	1	ENSDARG00000006220,ENSDARG00000046150,ENSDARG00000061248,ENSDARG00000089507,ENSDARG00000091598,ENSDARG00000097491,ENSDARG00000103155
0.024	333	210	13	0.062	0.039	GO:0051020	MF	9	GTPase binding	1	ENSDARG00000001968,ENSDARG00000012586,ENSDARG00000016490,ENSDARG00000022101,ENSDARG00000028857,ENSDARG00000043627,ENSDARG00000060309,ENSDARG00000076213,ENSDARG00000077656,ENSDARG00000078979,ENSDARG00000079742,ENSDARG00000100402,ENSDARG00000105490
0.0401	167	210	9	0.043	0.054	GO:0022843	MF	4	voltage-gated cation channel activity	1	ENSDARG00000008398,ENSDARG00000046079,ENSDARG00000060085,ENSDARG00000060095,ENSDARG00000062687,ENSDARG00000079295,ENSDARG00000079491,ENSDARG00000091130,ENSDARG00000102773
0.0162	62	58	7	0.121	0.113	HP:0007359	hp	14	Focal seizures	1	ENSDARG00000053665,ENSDARG00000058606,ENSDARG00000060085,ENSDARG00000078187,ENSDARG00000091130,ENSDARG00000099096,ENSDARG00000102773
0.000307	22	58	6	0.103	0.273	HP:0011153	hp	14	Focal motor seizures	2	ENSDARG00000053665,ENSDARG00000058606,ENSDARG00000060085,ENSDARG00000078187,ENSDARG00000091130,ENSDARG00000102773
0.0175	35	56	4	0.071	0.114	KEGG:00980	keg	12	Metabolism of xenobiotics by cytochrome P450	1	ENSDARG00000006220,ENSDARG00000068934,ENSDARG00000098315,ENSDARG00000104068
0.0367	298	56	10	0.179	0.034	KEGG:04010	keg	16	MAPK signaling pathway	1	ENSDARG00000008398,ENSDARG00000009493,ENSDARG00000046079,ENSDARG00000060551,ENSDARG00000062884,ENSDARG00000063157,ENSDARG00000078775,ENSDARG00000079295,ENSDARG00000098511,ENSDARG00000102773
ENSEMBL ID	GeneSymbol	Description
ENSDARG00000001968	DOCK5	dedicator of cytokinesis 5 [Source:ZFIN;Acc:ZDB-GENE-080108-4]
ENSDARG00000002026	QKIB	QKI, KH domain containing, RNA binding b [Source:ZFIN;Acc:ZDB-GENE-081028-54]
ENSDARG00000002231	PLPP2A	phospholipid phosphatase 2a [Source:ZFIN;Acc:ZDB-GENE-140703-2]
ENSDARG00000003544	ADARB1B	adenosine deaminase, RNA-specific, B1b [Source:ZFIN;Acc:ZDB-GENE-030219-15]
ENSDARG00000004931	SLC8A3	solute carrier family 8 (sodium/calcium exchanger), member 3 [Source:ZFIN;Acc:ZDB-GENE-050810-1]
ENSDARG00000005783	NCANB	neurocan b [Source:ZFIN;Acc:ZDB-GENE-050208-586]
ENSDARG00000005786	PPM1F	protein phosphatase, Mg2+/Mn2+ dependent, 1F [Source:ZFIN;Acc:ZDB-GENE-051128-2]
ENSDARG00000005915	TCF3A	transcription factor 3a [Source:ZFIN;Acc:ZDB-GENE-990415-51]
ENSDARG00000006094	IGF2R	insulin-like growth factor 2 receptor [Source:ZFIN;Acc:ZDB-GENE-041014-300]
ENSDARG00000006220	UGT1AB	UDP glucuronosyltransferase 1 family a, b [Source:ZFIN;Acc:ZDB-GENE-040426-2762]
ENSDARG00000008372	SPRED2B	sprouty-related, EVH1 domain containing 2b [Source:ZFIN;Acc:ZDB-GENE-040426-2342]
ENSDARG00000008398	CACNA1C	calcium channel, voltage-dependent, L type, alpha 1C subunit [Source:ZFIN;Acc:ZDB-GENE-020129-1]
ENSDARG00000009493	MAP3K13	si:ch211-45c16.2 [Source:ZFIN;Acc:ZDB-GENE-081105-15]
ENSDARG00000010565	AQP4	aquaporin 4 [Source:ZFIN;Acc:ZDB-GENE-040724-152]
ENSDARG00000012468	AACS	acetoacetyl-CoA synthetase [Source:ZFIN;Acc:ZDB-GENE-040426-903]
ENSDARG00000012586	FMNL2A	formin-like 2a [Source:ZFIN;Acc:ZDB-GENE-081105-70]
ENSDARG00000012699	BBX	bobby sox homolog (Drosophila) [Source:ZFIN;Acc:ZDB-GENE-091204-306]
ENSDARG00000013005	OPCML	opioid binding protein/cell adhesion molecule-like [Source:ZFIN;Acc:ZDB-GENE-040927-3]
ENSDARG00000013020	DTNBB	dystrobrevin, beta b [Source:ZFIN;Acc:ZDB-GENE-070117-3]
ENSDARG00000013072	MMP15B	matrix metallopeptidase 15b [Source:ZFIN;Acc:ZDB-GENE-070817-6]
ENSDARG00000013828	SNX13	sorting nexin 13 [Source:ZFIN;Acc:ZDB-GENE-050306-12]
ENSDARG00000014169	CABZ01041610.1	N/A
ENSDARG00000014854	REEP1	receptor accessory protein 1 [Source:ZFIN;Acc:ZDB-GENE-110411-267]
ENSDARG00000016348	DIP2BB	disco-interacting protein 2 homolog Bb [Source:ZFIN;Acc:ZDB-GENE-100729-4]
ENSDARG00000016439	SLC7A1	solute carrier family 7 (cationic amino acid transporter, y+ system), member 1 [Source:ZFIN;Acc:ZDB-GENE-091116-69]
ENSDARG00000016490	RAB11FIP3	RAB11 family interacting protein 3 (class II) [Source:ZFIN;Acc:ZDB-GENE-040724-138]
ENSDARG00000016667	GABBR1B	gamma-aminobutyric acid (GABA) B receptor, 1b [Source:ZFIN;Acc:ZDB-GENE-060503-5]
ENSDARG00000016788	ZEB1A	zinc finger E-box binding homeobox 1a [Source:ZFIN;Acc:ZDB-GENE-070912-124]
ENSDARG00000017220	OTUD7B	OTU deubiquitinase 7B [Source:ZFIN;Acc:ZDB-GENE-060616-1]
ENSDARG00000017365	SLC23A2	solute carrier family 23 (ascorbic acid transporter), member 2 [Source:ZFIN;Acc:ZDB-GENE-090521-3]
ENSDARG00000017785	ZGC:158689	zgc:158689 [Source:ZFIN;Acc:ZDB-GENE-070112-1902]
ENSDARG00000018393	KANK2	KN motif and ankyrin repeat domains 2 [Source:ZFIN;Acc:ZDB-GENE-040724-121]
ENSDARG00000018716	DGKH	diacylglycerol kinase, eta [Source:ZFIN;Acc:ZDB-GENE-070912-328]
ENSDARG00000018773	HIVEP2B	human immunodeficiency virus type I enhancer binding protein 2b [Source:ZFIN;Acc:ZDB-GENE-130530-562]
ENSDARG00000018896	MMP24	matrix metallopeptidase 24 [Source:ZFIN;Acc:ZDB-GENE-040724-262]
ENSDARG00000019442	AMOTL1	angiomotin like 1 [Source:HGNC Symbol;Acc:HGNC:17811]
ENSDARG00000019963	SFXN1	sideroflexin 1 [Source:ZFIN;Acc:ZDB-GENE-040801-45]
ENSDARG00000020057	BMPR2B	bone morphogenetic protein receptor, type II b (serine/threonine kinase) [Source:ZFIN;Acc:ZDB-GENE-070618-2]
ENSDARG00000020845	TNS1B	tensin 1b [Source:ZFIN;Acc:ZDB-GENE-030131-6933]
ENSDARG00000021305	SLC30A2	solute carrier family 30 (zinc transporter), member 2 [Source:ZFIN;Acc:ZDB-GENE-041014-347]
ENSDARG00000022101	OBSCNB	obscurin, cytoskeletal calmodulin and titin-interacting RhoGEF b [Source:ZFIN;Acc:ZDB-GENE-070119-5]
ENSDARG00000025206	SYT2A	synaptotagmin IIa [Source:ZFIN;Acc:ZDB-GENE-060503-315]
ENSDARG00000025299	TSPAN9A	tetraspanin 9a [Source:ZFIN;Acc:ZDB-GENE-060503-632]
ENSDARG00000027082	HMBOX1A	homeobox containing 1a [Source:ZFIN;Acc:ZDB-GENE-050913-89]
ENSDARG00000027088	PTGDSB.1	prostaglandin D2 synthase b, tandem duplicate 1 [Source:ZFIN;Acc:ZDB-GENE-030131-8436]
ENSDARG00000027497	MAST1A	microtubule associated serine/threonine kinase 1a [Source:ZFIN;Acc:ZDB-GENE-121214-221]
ENSDARG00000027777	TNFAIP3	tumor necrosis factor, alpha-induced protein 3 [Source:ZFIN;Acc:ZDB-GENE-100212-2]
ENSDARG00000028857	SGSM1A	small G protein signaling modulator 1a [Source:ZFIN;Acc:ZDB-GENE-060526-379]
ENSDARG00000030896	FOXQ1A	forkhead box Q1a [Source:ZFIN;Acc:ZDB-GENE-070424-74]
ENSDARG00000031095	VEPH1	ventricular zone expressed PH domain-containing 1 [Source:ZFIN;Acc:ZDB-GENE-041014-375]
ENSDARG00000032197	KLF12B	Kruppel-like factor 12b [Source:ZFIN;Acc:ZDB-GENE-071004-22]
ENSDARG00000032761	PDE4D	phosphodiesterase 4D, cAMP-specific [Source:ZFIN;Acc:ZDB-GENE-081105-16]
ENSDARG00000032990	PLXNB3	plexin B3 [Source:ZFIN;Acc:ZDB-GENE-081104-53]
ENSDARG00000033498	RORB	RAR-related orphan receptor B [Source:ZFIN;Acc:ZDB-GENE-061204-2]
ENSDARG00000033840	FAT3A	FAT atypical cadherin 3a [Source:ZFIN;Acc:ZDB-GENE-060929-1254]
ENSDARG00000035133	PHO	phoenix [Source:ZFIN;Acc:ZDB-GENE-030131-5935]
ENSDARG00000035308	GRB10B	growth factor receptor-bound protein 10b [Source:ZFIN;Acc:ZDB-GENE-091020-12]
ENSDARG00000036626	SEMA6BA	sema domain, transmembrane domain (TM), and cytoplasmic domain, (semaphorin) 6Ba [Source:ZFIN;Acc:ZDB-GENE-131024-1]
ENSDARG00000036826	ANKRD52A	ankyrin repeat domain 52a [Source:ZFIN;Acc:ZDB-GENE-050522-247]
ENSDARG00000036998	ARF3B	ADP-ribosylation factor 3b [Source:ZFIN;Acc:ZDB-GENE-030616-356]
ENSDARG00000037813	ZGC:113278	zgc:113278 [Source:ZFIN;Acc:ZDB-GENE-050327-66]
ENSDARG00000038655	AJAP1	adherens junctions associated protein 1 [Source:ZFIN;Acc:ZDB-GENE-041210-353]
ENSDARG00000039901	SH3GL2	SH3 domain containing GRB2 like 2, endophilin A1 [Source:HGNC Symbol;Acc:HGNC:10831]
ENSDARG00000042114	BIN1A	bridging integrator 1a [Source:ZFIN;Acc:ZDB-GENE-070912-715]
ENSDARG00000042123	NUDT3B	nudix (nucleoside diphosphate linked moiety X)-type motif 3b [Source:ZFIN;Acc:ZDB-GENE-041010-128]
ENSDARG00000042492	SI:DKEY-250D21.1	si:dkey-250d21.1 [Source:ZFIN;Acc:ZDB-GENE-030131-8276]
ENSDARG00000042518	HIPK2	homeodomain interacting protein kinase 2 [Source:ZFIN;Acc:ZDB-GENE-031125-4]
ENSDARG00000043243	PRKCHB	protein kinase C, eta, b [Source:ZFIN;Acc:ZDB-GENE-041001-104]
ENSDARG00000043553	CHES1	checkpoint suppressor 1 [Source:ZFIN;Acc:ZDB-GENE-040217-1]
ENSDARG00000043627	TBC1D9B	TBC1 domain family member 9B [Source:HGNC Symbol;Acc:HGNC:29097]
ENSDARG00000043646	SLC6A8	solute carrier family 6 (neurotransmitter transporter), member 8 [Source:ZFIN;Acc:ZDB-GENE-071024-2]
ENSDARG00000043757	PTBP3	polypyrimidine tract binding protein 3 [Source:ZFIN;Acc:ZDB-GENE-091116-1]
ENSDARG00000045094	SI:DKEY-222B8.1	si:dkey-222b8.1 [Source:ZFIN;Acc:ZDB-GENE-060503-248]
ENSDARG00000045768	CRY1AA	cryptochrome circadian clock 1aa [Source:ZFIN;Acc:ZDB-GENE-010426-2]
ENSDARG00000046079	CACNG6B	calcium channel, voltage-dependent, gamma subunit 6b [Source:ZFIN;Acc:ZDB-GENE-100922-272]
ENSDARG00000046150	B4GALNT4A	beta-1,4-N-acetyl-galactosaminyl transferase 4a [Source:ZFIN;Acc:ZDB-GENE-100422-4]
ENSDARG00000052091	RBPJB	recombination signal binding protein for immunoglobulin kappa J region b [Source:ZFIN;Acc:ZDB-GENE-070319-1]
ENSDARG00000052618	AHRRB	aryl-hydrocarbon receptor repressor b [Source:ZFIN;Acc:ZDB-GENE-051018-2]
ENSDARG00000053326	GNA11B	guanine nucleotide binding protein (G protein), alpha 11b (Gq class) [Source:ZFIN;Acc:ZDB-GENE-041121-9]
ENSDARG00000053454	CNTN3B	contactin 3b [Source:ZFIN;Acc:ZDB-GENE-130530-645]
ENSDARG00000053665	GABRG2	gamma-aminobutyric acid (GABA) A receptor, gamma 2 [Source:ZFIN;Acc:ZDB-GENE-091118-65]
ENSDARG00000053771	APBB3	amyloid beta (A4) precursor protein-binding, family B, member 3 [Source:ZFIN;Acc:ZDB-GENE-140106-53]
ENSDARG00000053804	OSBPL2A	oxysterol binding protein-like 2a [Source:ZFIN;Acc:ZDB-GENE-091116-46]
ENSDARG00000054003	RARGB	retinoic acid receptor, gamma b [Source:ZFIN;Acc:ZDB-GENE-070314-1]
ENSDARG00000054253	SOBPA	sine oculis binding protein homolog (Drosophila) a [Source:ZFIN;Acc:ZDB-GENE-090313-313]
ENSDARG00000054690	SI:DKEY-166K12.1	si:dkey-166k12.1 [Source:ZFIN;Acc:ZDB-GENE-120215-78]
ENSDARG00000054771	GHRA	growth hormone receptor a [Source:ZFIN;Acc:ZDB-GENE-070509-1]
ENSDARG00000054941	LDLRAD4B	low density lipoprotein receptor class A domain containing 4b [Source:ZFIN;Acc:ZDB-GENE-091230-3]
ENSDARG00000055133	CENPF	centromere protein F [Source:ZFIN;Acc:ZDB-GENE-041111-205]
ENSDARG00000055154	SLC8A4A	solute carrier family 8 (sodium/calcium exchanger), member 4a [Source:ZFIN;Acc:ZDB-GENE-060110-2]
ENSDARG00000057903	SI:CH211-266G18.10	si:ch211-266g18.10 [Source:ZFIN;Acc:ZDB-GENE-131127-188]
ENSDARG00000058248	SI:DKEYP-77H1.4	si:dkeyp-77h1.4 [Source:ZFIN;Acc:ZDB-GENE-050208-18]
ENSDARG00000058259	CELSR1B	cadherin EGF LAG seven-pass G-type receptor 1b [Source:ZFIN;Acc:ZDB-GENE-050823-4]
ENSDARG00000058565	SOCS6A	suppressor of cytokine signaling 6a [Source:ZFIN;Acc:ZDB-GENE-080722-35]
ENSDARG00000058606	SIK1	salt-inducible kinase 1 [Source:ZFIN;Acc:ZDB-GENE-030131-9446]
ENSDARG00000058702	VAX2	ventral anterior homeobox 2 [Source:ZFIN;Acc:ZDB-GENE-030904-8]
ENSDARG00000058771	NAV1B	neuron navigator 1b [Source:ZFIN;Acc:ZDB-GENE-120215-84]
ENSDARG00000059090	SSTR2A	somatostatin receptor 2a [Source:ZFIN;Acc:ZDB-GENE-140130-1]
ENSDARG00000060085	KCNQ3	potassium voltage-gated channel, KQT-like subfamily, member 3 [Source:ZFIN;Acc:ZDB-GENE-070912-301]
ENSDARG00000060095	KCNB1	potassium voltage-gated channel, Shab-related subfamily, member 1 [Source:ZFIN;Acc:ZDB-GENE-090831-3]
ENSDARG00000060148	SH3PXD2AA	SH3 and PX domains 2Aa [Source:ZFIN;Acc:ZDB-GENE-060503-271]
ENSDARG00000060309	SRGAP3	SLIT-ROBO Rho GTPase activating protein 3 [Source:ZFIN;Acc:ZDB-GENE-060524-4]
ENSDARG00000060372	PLXNA2	plexin A2 [Source:ZFIN;Acc:ZDB-GENE-090311-6]
ENSDARG00000060551	RPS6KA5	ribosomal protein S6 kinase, polypeptide 5 [Source:ZFIN;Acc:ZDB-GENE-130530-693]
ENSDARG00000060597	ZGC:158659	zgc:158659 [Source:ZFIN;Acc:ZDB-GENE-070112-492]
ENSDARG00000060865	SCAI	suppressor of cancer cell invasion [Source:ZFIN;Acc:ZDB-GENE-060526-57]
ENSDARG00000061021	FAM160A1A	family with sequence similarity 160, member A1a [Source:ZFIN;Acc:ZDB-GENE-090312-132]
ENSDARG00000061248	XYLT1	xylosyltransferase I [Source:ZFIN;Acc:ZDB-GENE-111017-2]
ENSDARG00000061265	LMLN	leishmanolysin-like (metallopeptidase M8 family) [Source:ZFIN;Acc:ZDB-GENE-081104-298]
ENSDARG00000061268	AGO2	argonaute RISC catalytic component 2 [Source:ZFIN;Acc:ZDB-GENE-110606-6]
ENSDARG00000061368	KLF13	Kruppel-like factor 13 [Source:ZFIN;Acc:ZDB-GENE-060929-1274]
ENSDARG00000061481	WU:FJ05G07	wu:fj05g07 [Source:ZFIN;Acc:ZDB-GENE-030131-7307]
ENSDARG00000061635	MYO5AA	myosin VAa [Source:ZFIN;Acc:ZDB-GENE-041027-2]
ENSDARG00000061660	CABZ01055347.1	N/A
ENSDARG00000061699	SIPA1L3	signal-induced proliferation-associated 1 like 3 [Source:ZFIN;Acc:ZDB-GENE-050420-109]
ENSDARG00000061896	SLCO2A1	solute carrier organic anion transporter family, member 2A1 [Source:ZFIN;Acc:ZDB-GENE-060606-3]
ENSDARG00000061992	DOT1L	DOT1-like histone H3K79 methyltransferase [Source:ZFIN;Acc:ZDB-GENE-060503-341]
ENSDARG00000062248	PTPN21	protein tyrosine phosphatase, non-receptor type 21 [Source:ZFIN;Acc:ZDB-GENE-080102-4]
ENSDARG00000062550	RC3H1A	ring finger and CCCH-type domains 1a [Source:ZFIN;Acc:ZDB-GENE-050208-702]
ENSDARG00000062687	KCNH7	potassium channel, voltage gated eag related subfamily H, member 7 [Source:ZFIN;Acc:ZDB-GENE-120214-39]
ENSDARG00000062812	GLSA	glutaminase a [Source:ZFIN;Acc:ZDB-GENE-050204-3]
ENSDARG00000062884	MAP3K2	mitogen-activated protein kinase kinase kinase 2 [Source:ZFIN;Acc:ZDB-GENE-120215-96]
ENSDARG00000062974	ITGA2.2	integrin, alpha 2 (CD49B, alpha 2 subunit of VLA-2 receptor), tandem duplicate 2 [Source:ZFIN;Acc:ZDB-GENE-091118-70]
ENSDARG00000063157	MAPK8IP2	mitogen-activated protein kinase 8 interacting protein 2 [Source:ZFIN;Acc:ZDB-GENE-070705-326]
ENSDARG00000063299	PCLOA	piccolo presynaptic cytomatrix protein a [Source:ZFIN;Acc:ZDB-GENE-030131-8115]
ENSDARG00000063361	SI:CH211-1E14.1	si:ch211-1e14.1 [Source:ZFIN;Acc:ZDB-GENE-050420-149]
ENSDARG00000063594	HIPK1A	homeodomain interacting protein kinase 1a [Source:ZFIN;Acc:ZDB-GENE-081031-101]
ENSDARG00000063706	PDE8B	phosphodiesterase 8B [Source:ZFIN;Acc:ZDB-GENE-091117-3]
ENSDARG00000068787	SLC6A17	solute carrier family 6 (neutral amino acid transporter), member 17 [Source:ZFIN;Acc:ZDB-GENE-030131-8187]
ENSDARG00000068934	CYP1B1	cytochrome P450, family 1, subfamily B, polypeptide 1 [Source:ZFIN;Acc:ZDB-GENE-030902-1]
ENSDARG00000069958	SH2B3	SH2B adaptor protein 3 [Source:ZFIN;Acc:ZDB-GENE-041210-359]
ENSDARG00000070214	SLC41A1	solute carrier family 41 (magnesium transporter), member 1 [Source:ZFIN;Acc:ZDB-GENE-030131-4700]
ENSDARG00000070227	NHSA	Nance-Horan syndrome a (congenital cataracts and dental anomalies) [Source:ZFIN;Acc:ZDB-GENE-090617-1]
ENSDARG00000070331	MUC5.1	mucin 5.1, oligomeric mucus/gel-forming [Source:ZFIN;Acc:ZDB-GENE-120822-1]
ENSDARG00000070575	FAM131BB	family with sequence similarity 131, member Bb [Source:ZFIN;Acc:ZDB-GENE-100922-12]
ENSDARG00000071524	INSRB	insulin receptor b [Source:ZFIN;Acc:ZDB-GENE-020503-4]
ENSDARG00000071567	TSTD1	si:dkey-34l15.1 [Source:ZFIN;Acc:ZDB-GENE-081107-63]
ENSDARG00000073743	SLC25A37	solute carrier family 25 (mitochondrial iron transporter), member 37 [Source:ZFIN;Acc:ZDB-GENE-031118-202]
ENSDARG00000073857	KLF7A	Kruppel-like factor 7a [Source:ZFIN;Acc:ZDB-GENE-050522-276]
ENSDARG00000074245	SPEN	spen family transcriptional repressor [Source:ZFIN;Acc:ZDB-GENE-050309-70]
ENSDARG00000074677	FREM3	Fras1 related extracellular matrix 3 [Source:ZFIN;Acc:ZDB-GENE-030131-9788]
ENSDARG00000074723	MYO10L1	myosin X-like 1 [Source:ZFIN;Acc:ZDB-GENE-080425-1]
ENSDARG00000074905	CAMK1DA	calcium/calmodulin-dependent protein kinase 1Da [Source:ZFIN;Acc:ZDB-GENE-080402-7]
ENSDARG00000075230	TET1	tet methylcytosine dioxygenase 1 [Source:ZFIN;Acc:ZDB-GENE-090312-88]
ENSDARG00000075928	HIVEP3A	human immunodeficiency virus type I enhancer binding protein 3a [Source:ZFIN;Acc:ZDB-GENE-081029-2]
ENSDARG00000076041	WWC1	WW and C2 domain containing 1 [Source:ZFIN;Acc:ZDB-GENE-091118-8]
ENSDARG00000076213	DOCK4	si:dkey-81e3.1 [Source:ZFIN;Acc:ZDB-GENE-120703-34]
ENSDARG00000076292	TNS2A	tensin 2a [Source:ZFIN;Acc:ZDB-GENE-090312-163]
ENSDARG00000076830	SI:DKEY-65B12.6	si:dkey-65b12.6 [Source:ZFIN;Acc:ZDB-GENE-060526-329]
ENSDARG00000076856	FREM2A	Fras1 related extracellular matrix protein 2a [Source:ZFIN;Acc:ZDB-GENE-081119-3]
ENSDARG00000076991	DOLK	dolichol kinase [Source:ZFIN;Acc:ZDB-GENE-070410-59]
ENSDARG00000077384	DNAH11	dynein, axonemal, heavy chain 11 [Source:ZFIN;Acc:ZDB-GENE-100922-8]
ENSDARG00000077474	PLA2R1	phospholipase A2 receptor 1 [Source:ZFIN;Acc:ZDB-GENE-120323-1]
ENSDARG00000077656	ARFGEF3	ARFGEF family member 3 [Source:ZFIN;Acc:ZDB-GENE-081107-37]
ENSDARG00000077686	AAK1B	AP2 associated kinase 1b [Source:ZFIN;Acc:ZDB-GENE-091118-25]
ENSDARG00000077761	NLGN4B	neuroligin 4b [Source:ZFIN;Acc:ZDB-GENE-100309-1]
ENSDARG00000077909	RCE1A	Ras converting CAAX endopeptidase 1a [Source:ZFIN;Acc:ZDB-GENE-041008-116]
ENSDARG00000078011	NAV1	neuron navigator 1 [Source:HGNC Symbol;Acc:HGNC:15989]
ENSDARG00000078187	SLC12A5B	solute carrier family 12 (potassium/chloride transporter), member 5b [Source:ZFIN;Acc:ZDB-GENE-080707-1]
ENSDARG00000078227	CSPG4	chondroitin sulfate proteoglycan 4 [Source:ZFIN;Acc:ZDB-GENE-050519-1]
ENSDARG00000078327	CEP170B	si:ch73-212j7.1 [Source:ZFIN;Acc:ZDB-GENE-081104-258]
ENSDARG00000078567	LONRF1L	LON peptidase N-terminal domain and ring finger 1, like [Source:ZFIN;Acc:ZDB-GENE-081104-397]
ENSDARG00000078775	RASA2	RAS p21 protein activator 2 [Source:HGNC Symbol;Acc:HGNC:9872]
ENSDARG00000078979	ARHGEF40	Rho guanine nucleotide exchange factor (GEF) 40 [Source:ZFIN;Acc:ZDB-GENE-110623-2]
ENSDARG00000079064	PDE2A	phosphodiesterase 2A [Source:HGNC Symbol;Acc:HGNC:8777]
ENSDARG00000079119	SI:CH211-229D2.5	si:ch211-229d2.5 [Source:ZFIN;Acc:ZDB-GENE-121214-200]
ENSDARG00000079295	CACNA1BB	calcium channel, voltage-dependent, N type, alpha 1B subunit, b [Source:ZFIN;Acc:ZDB-GENE-090514-4]
ENSDARG00000079491	KCNA3A	potassium voltage-gated channel, shaker-related subfamily, member 3a [Source:ZFIN;Acc:ZDB-GENE-130530-873]
ENSDARG00000079741	CABZ01075131.1	N/A
ENSDARG00000079742	MCF2L2	MCF.2 cell line derived transforming sequence-like 2 [Source:ZFIN;Acc:ZDB-GENE-100812-1]
ENSDARG00000079811	MICALL1A	MICAL-like 1a [Source:ZFIN;Acc:ZDB-GENE-110119-1]
ENSDARG00000079878	TMEM151BB	transmembrane protein 151Bb [Source:ZFIN;Acc:ZDB-GENE-131125-107]
ENSDARG00000086224	FAM155A	family with sequence similarity 155 member A [Source:HGNC Symbol;Acc:HGNC:33877]
ENSDARG00000086826	SULT6B1	sulfotransferase family, cytosolic, 6b, member 1 [Source:ZFIN;Acc:ZDB-GENE-050417-228]
ENSDARG00000087822	AGAP3	ArfGAP with GTPase domain, ankyrin repeat and PH domain 3 [Source:ZFIN;Acc:ZDB-GENE-110927-1]
ENSDARG00000088136	PCDH2AA15	protocadherin 2 alpha a 15 [Source:ZFIN;Acc:ZDB-GENE-041118-15]
ENSDARG00000089507	UGT1B5	UDP glucuronosyltransferase 1 family, polypeptide B5 [Source:ZFIN;Acc:ZDB-GENE-080227-14]
ENSDARG00000089538	RNF166	ring finger protein 166 [Source:ZFIN;Acc:ZDB-GENE-061121-1]
ENSDARG00000089691	ISM2A	isthmin 2a [Source:ZFIN;Acc:ZDB-GENE-130530-972]
ENSDARG00000089697	NFE2L2B	nuclear factor, erythroid 2-like 2b [Source:ZFIN;Acc:ZDB-GENE-120320-3]
ENSDARG00000091116	PKHD1L1	polycystic kidney and hepatic disease 1 (autosomal recessive)-like 1 [Source:ZFIN;Acc:ZDB-GENE-060503-475]
ENSDARG00000091130	KCNQ2B	potassium voltage-gated channel, KQT-like subfamily, member 2b [Source:ZFIN;Acc:ZDB-GENE-120130-1]
ENSDARG00000091408	MTCL1	microtubule crosslinking factor 1 [Source:ZFIN;Acc:ZDB-GENE-120508-3]
ENSDARG00000091548	STARD9	StAR-related lipid transfer (START) domain containing 9 [Source:ZFIN;Acc:ZDB-GENE-111111-11]
ENSDARG00000091598	SI:CH73-91K6.2	si:ch73-91k6.2 [Source:ZFIN;Acc:ZDB-GENE-050208-270]
ENSDARG00000091619	MVB12BA	multivesicular body subunit 12Ba [Source:ZFIN;Acc:ZDB-GENE-060929-372]
ENSDARG00000091792	AKAP12A	A kinase (PRKA) anchor protein 12a [Source:ZFIN;Acc:ZDB-GENE-110310-3]
ENSDARG00000092644	AGO1	argonaute RISC catalytic component 1 [Source:ZFIN;Acc:ZDB-GENE-110606-3]
ENSDARG00000093799	SETBP1	SET binding protein 1 [Source:ZFIN;Acc:ZDB-GENE-060526-72]
ENSDARG00000096920	SI:ZFOS-375H5.1	si:zfos-375h5.1 [Source:ZFIN;Acc:ZDB-GENE-131121-284]
ENSDARG00000097491	UGT1B1	UDP glucuronosyltransferase 1 family, polypeptide B1 [Source:ZFIN;Acc:ZDB-GENE-080227-10]
ENSDARG00000097650	ATG2B	autophagy related 2B [Source:ZFIN;Acc:ZDB-GENE-131121-626]
ENSDARG00000098315	CYP1A	cytochrome P450, family 1, subfamily A [Source:ZFIN;Acc:ZDB-GENE-011219-1]
ENSDARG00000098420	SNTA1	syntrophin alpha 1 [Source:HGNC Symbol;Acc:HGNC:11167]
ENSDARG00000098511	NTRK2B	neurotrophic tyrosine kinase, receptor, type 2b [Source:ZFIN;Acc:ZDB-GENE-010126-2]
ENSDARG00000098566	SI:CH73-233F7.4	si:ch73-233f7.4 [Source:ZFIN;Acc:ZDB-GENE-141215-59]
ENSDARG00000098605	SLX1B	SLX1 homolog B, structure-specific endonuclease subunit [Source:ZFIN;Acc:ZDB-GENE-130530-826]
ENSDARG00000098746	DHRS13L1	dehydrogenase/reductase (SDR family) member 13 like 1 [Source:ZFIN;Acc:ZDB-GENE-040426-1907]
ENSDARG00000098761	RGS2	regulator of G protein signaling 2 [Source:ZFIN;Acc:ZDB-GENE-040718-410]
ENSDARG00000098857	LIFRA	leukemia inhibitory factor receptor alpha a [Source:ZFIN;Acc:ZDB-GENE-050327-16]
ENSDARG00000099024	SI:CH211-188P14.5	si:ch211-188p14.5 [Source:ZFIN;Acc:ZDB-GENE-121214-312]
ENSDARG00000099096	GABRB4	gamma-aminobutyric acid (GABA) A receptor, beta 4 [Source:ZFIN;Acc:ZDB-GENE-070424-211]
ENSDARG00000099199	ITCHB	itchy E3 ubiquitin protein ligase b [Source:ZFIN;Acc:ZDB-GENE-131024-2]
ENSDARG00000099364	BX511034.6	N/A
ENSDARG00000099437	SI:CH1073-268J14.1	si:ch1073-268j14.1 [Source:ZFIN;Acc:ZDB-GENE-141216-172]
ENSDARG00000099702	CABZ01103755.1	N/A
ENSDARG00000100402	FGD1	FYVE, RhoGEF and PH domain containing 1 [Source:ZFIN;Acc:ZDB-GENE-081104-33]
ENSDARG00000100562	CABZ01080702.1	N/A
ENSDARG00000100592	SLC8A2B	solute carrier family 8 (sodium/calcium exchanger), member 2b [Source:ZFIN;Acc:ZDB-GENE-050419-209]
ENSDARG00000100679	LRCH3	leucine-rich repeats and calponin homology (CH) domain containing 3 [Source:ZFIN;Acc:ZDB-GENE-071004-44]
ENSDARG00000101019	EXT1B	exostosin glycosyltransferase 1b [Source:ZFIN;Acc:ZDB-GENE-050211-4]
ENSDARG00000101175	MCU	mitochondrial calcium uniporter [Source:ZFIN;Acc:ZDB-GENE-061013-24]
ENSDARG00000101195	CYP1C1	cytochrome P450, family 1, subfamily C, polypeptide 1 [Source:ZFIN;Acc:ZDB-GENE-050522-501]
ENSDARG00000101364	WFIKKN1	WAP, follistatin/kazal, immunoglobulin, kunitz and netrin domain containing 1 [Source:ZFIN;Acc:ZDB-GENE-040426-2465]
ENSDARG00000101713	SCN2B	sodium channel, voltage-gated, type II, beta [Source:ZFIN;Acc:ZDB-GENE-070920-1]
ENSDARG00000102095	SI:CH73-233F7.5	si:ch73-233f7.5 [Source:ZFIN;Acc:ZDB-GENE-141215-58]
ENSDARG00000102142	ECE2B	endothelin converting enzyme 2b [Source:ZFIN;Acc:ZDB-GENE-131120-140]
ENSDARG00000102331	CABZ01076250.1	N/A
ENSDARG00000102478	ADAMTS7	ADAM metallopeptidase with thrombospondin type 1 motif 7 [Source:HGNC Symbol;Acc:HGNC:223]
ENSDARG00000102589	RSF1A	remodeling and spacing factor 1a [Source:ZFIN;Acc:ZDB-GENE-120215-90]
ENSDARG00000102719	PCDH2AB3	protocadherin 2 alpha b 3 [Source:ZFIN;Acc:ZDB-GENE-041118-3]
ENSDARG00000102773	CACNA1DA	calcium channel, voltage-dependent, L type, alpha 1D subunit, a [Source:ZFIN;Acc:ZDB-GENE-030616-135]
ENSDARG00000103056	ITGA4	integrin alpha 4 [Source:ZFIN;Acc:ZDB-GENE-110411-108]
ENSDARG00000103155	EXT1A	exostosin glycosyltransferase 1a [Source:ZFIN;Acc:ZDB-GENE-050211-3]
ENSDARG00000103199	SI:DKEY-247K7.2	si:dkey-247k7.2 [Source:ZFIN;Acc:ZDB-GENE-031118-45]
ENSDARG00000103456	CYP2AA11	cytochrome P450, family 2, subfamily AA, polypeptide 11 [Source:ZFIN;Acc:ZDB-GENE-110114-3]
ENSDARG00000103576	EPHB3	EPH receptor B3 [Source:HGNC Symbol;Acc:HGNC:3394]
ENSDARG00000103906	PCDH2AB10	protocadherin 2 alpha b 10 [Source:ZFIN;Acc:ZDB-GENE-041118-9]
ENSDARG00000104068	GSTP1	glutathione S-transferase pi 1 [Source:ZFIN;Acc:ZDB-GENE-020806-4]
ENSDARG00000104283	CDC42BPAA	CDC42 binding protein kinase alpha (DMPK-like) a [Source:ZFIN;Acc:ZDB-GENE-120727-12]
ENSDARG00000104483	GIPC1	GIPC PDZ domain containing family, member 1 [Source:ZFIN;Acc:ZDB-GENE-060726-1]
ENSDARG00000104981	SLC45A4	solute carrier family 45 member 4 [Source:HGNC Symbol;Acc:HGNC:29196]
ENSDARG00000105490	RPH3AB	rabphilin 3A homolog (mouse), b [Source:ZFIN;Acc:ZDB-GENE-090706-3]
ENSDARG00000105863	FO904970.1	N/A
ENSDARG00000106418	CABZ01066921.1	N/A
ENSDARG00000106989	ZNF821	zinc finger protein 821 [Source:HGNC Symbol;Acc:HGNC:28043]

## Sheet: 9_MA
ENSEMBL ID	GeneSymbol	Description
ENSDARG00000001910	RORAB	RAR-related orphan receptor A, paralog b [Source:ZFIN;Acc:ZDB-GENE-040426-855]
ENSDARG00000001993	MYHB	myosin, heavy chain b [Source:ZFIN;Acc:ZDB-GENE-081124-1]
ENSDARG00000004358	GNB3A	guanine nucleotide binding protein (G protein), beta polypeptide 3a [Source:ZFIN;Acc:ZDB-GENE-040718-134]
ENSDARG00000006467	PCDH8	protocadherin 8 [Source:ZFIN;Acc:ZDB-GENE-980526-242]
ENSDARG00000011640	SYT5B	synaptotagmin Vb [Source:ZFIN;Acc:ZDB-GENE-050522-134]
ENSDARG00000012126	ZGC:109965	zgc:109965 [Source:ZFIN;Acc:ZDB-GENE-050913-21]
ENSDARG00000014233	SEPT8B	septin 8b [Source:ZFIN;Acc:ZDB-GENE-070424-3]
ENSDARG00000015732	CAX2	cation/H+ exchanger protein 2 [Source:ZFIN;Acc:ZDB-GENE-100825-2]
ENSDARG00000016854	NEUROD2	neurogenic differentiation 2 [Source:ZFIN;Acc:ZDB-GENE-010608-3]
ENSDARG00000019902	RCVRN2	recoverin 2 [Source:ZFIN;Acc:ZDB-GENE-030131-7590]
ENSDARG00000023082	KRT1-19D	keratin, type 1, gene 19d [Source:ZFIN;Acc:ZDB-GENE-060316-1]
ENSDARG00000028804	ANKRD9	ankyrin repeat domain 9 [Source:ZFIN;Acc:ZDB-GENE-041114-3]
ENSDARG00000034007	PROM1B	prominin 1 b [Source:ZFIN;Acc:ZDB-GENE-031003-1]
ENSDARG00000037588	BHLHE23	basic helix-loop-helix family, member e23 [Source:ZFIN;Acc:ZDB-GENE-050913-22]
ENSDARG00000037921	GNG13B	guanine nucleotide binding protein (G protein), gamma 13b [Source:ZFIN;Acc:ZDB-GENE-040718-97]
ENSDARG00000041382	SI:DKEY-283B15.2	si:dkey-283b15.2 [Source:ZFIN;Acc:ZDB-GENE-100921-93]
ENSDARG00000042872	ZDHHC8A	zinc finger, DHHC-type containing 8a [Source:ZFIN;Acc:ZDB-GENE-091118-26]
ENSDARG00000043806	POSTNA	periostin, osteoblast specific factor a [Source:ZFIN;Acc:ZDB-GENE-091113-23]
ENSDARG00000052700	SLC9B2	si:dkey-162b23.4 [Source:ZFIN;Acc:ZDB-GENE-110411-203]
ENSDARG00000053364	PAX10	paired box 10 [Source:ZFIN;Acc:ZDB-GENE-081022-10]
ENSDARG00000054562	HER15.1	hairy and enhancer of split-related 15, tandem duplicate 1 [Source:ZFIN;Acc:ZDB-GENE-030707-2]
ENSDARG00000056036	STXBP1B	syntaxin binding protein 1b [Source:ZFIN;Acc:ZDB-GENE-060531-166]
ENSDARG00000056084	IGSF21B	immunoglobin superfamily, member 21b [Source:ZFIN;Acc:ZDB-GENE-070424-59]
ENSDARG00000058606	SIK1	salt-inducible kinase 1 [Source:ZFIN;Acc:ZDB-GENE-030131-9446]
ENSDARG00000060893	COL8A2	collagen, type VIII, alpha 2 [Source:ZFIN;Acc:ZDB-GENE-060503-488]
ENSDARG00000062661	ABCA4B	ATP-binding cassette, sub-family A (ABC1), member 4b [Source:ZFIN;Acc:ZDB-GENE-050517-4]
ENSDARG00000074656	CTSS2.1	cathepsin S, ortholog2, tandem duplicate 1 [Source:ZFIN;Acc:ZDB-GENE-050522-559]
ENSDARG00000077341	PPP1R14C	protein phosphatase 1, regulatory (inhibitor) subunit 14C [Source:ZFIN;Acc:ZDB-GENE-050706-92]
ENSDARG00000078440	CCDC88AA	coiled-coil domain containing 88Aa [Source:ZFIN;Acc:ZDB-GENE-100701-2]
ENSDARG00000078557	SI:CH211-57N23.4	si:ch211-57n23.4 [Source:ZFIN;Acc:ZDB-GENE-140106-153]
ENSDARG00000079946	SQLEA	squalene epoxidase a [Source:ZFIN;Acc:ZDB-GENE-071004-98]
ENSDARG00000089156	EGR3	early growth response 3 [Source:ZFIN;Acc:ZDB-GENE-040718-394]
ENSDARG00000092269	SI:DKEYP-41F9.4	si:dkeyp-41f9.4 [Source:ZFIN;Acc:ZDB-GENE-091204-320]
ENSDARG00000092759	SI:DKEY-61P9.9	si:dkey-61p9.9 [Source:ZFIN;Acc:ZDB-GENE-041210-240]
ENSDARG00000096313	BX537277.4	N/A
ENSDARG00000097613	IGFN1.3	immunoglobulin-like and fibronectin type III domain containing 1, tandem duplicate 3 [Source:ZFIN;Acc:ZDB-GENE-131122-44]
ENSDARG00000098761	RGS2	regulator of G protein signaling 2 [Source:ZFIN;Acc:ZDB-GENE-040718-410]
ENSDARG00000099299	SI:CH1073-83N3.2	si:ch1073-83n3.2 [Source:ZFIN;Acc:ZDB-GENE-141219-10]
ENSDARG00000101364	WFIKKN1	WAP, follistatin/kazal, immunoglobulin, kunitz and netrin domain containing 1 [Source:ZFIN;Acc:ZDB-GENE-040426-2465]
ENSDARG00000102113	SI:CH211-193L2.7	si:ch211-193l2.7 [Source:ZFIN;Acc:ZDB-GENE-141216-393]
ENSDARG00000102393	ARL3L1	ADP-ribosylation factor-like 3, like 1 [Source:ZFIN;Acc:ZDB-GENE-040426-1649]
ENSDARG00000104329	SI:CH73-281K2.5	si:ch73-281k2.5 [Source:ZFIN;Acc:ZDB-GENE-141222-10]
ENSDARG00000107353	BX957322.3	N/A

## Sheet: BbF
p-value	T	Q	Q&T	Q&T/Q	Q&T/T	term ID	t type	t group	t name	t depth	Q&T list
2.09e-07	47	115	8	0.07	0.17	GO:0009410	BP	2	response to xenobiotic stimulus	1	ENSDARG00000006220,ENSDARG00000030896,ENSDARG00000052618,ENSDARG00000068934,ENSDARG00000086826,ENSDARG00000098315,ENSDARG00000099702,ENSDARG00000104068
6.62e-05	37	115	6	0.052	0.162	GO:0071466	BP	2	cellular response to xenobiotic stimulus	1	ENSDARG00000006220,ENSDARG00000052618,ENSDARG00000068934,ENSDARG00000086826,ENSDARG00000098315,ENSDARG00000104068
0.015	846	115	16	0.139	0.019	GO:0034220	BP	12	ion transmembrane transport	1	ENSDARG00000004931,ENSDARG00000008398,ENSDARG00000010565,ENSDARG00000017365,ENSDARG00000019963,ENSDARG00000021305,ENSDARG00000043646,ENSDARG00000055154,ENSDARG00000057903,ENSDARG00000070214,ENSDARG00000079491,ENSDARG00000091130,ENSDARG00000099096,ENSDARG00000100592,ENSDARG00000102064,ENSDARG00000102773
0.00253	5	115	3	0.026	0.6	GO:0042542	BP	10	response to hydrogen peroxide	1	ENSDARG00000034503,ENSDARG00000045768,ENSDARG00000056885
0.0315	434	115	11	0.096	0.025	GO:0046873	MF	14	metal ion transmembrane transporter activity	1	ENSDARG00000004931,ENSDARG00000008398,ENSDARG00000017365,ENSDARG00000021305,ENSDARG00000043646,ENSDARG00000055154,ENSDARG00000079491,ENSDARG00000091130,ENSDARG00000100592,ENSDARG00000102064,ENSDARG00000102773
0.0498	2	115	2	0.017	1	GO:0034811	MF	15	benzo(a)pyrene 9,10-dioxygenase activity	1	ENSDARG00000101195,ENSDARG00000101789
0.0498	2	115	2	0.017	1	GO:0034813	MF	19	benzo(a)pyrene 7,8-dioxygenase activity	1	ENSDARG00000101195,ENSDARG00000101789
0.0498	2	115	2	0.017	1	GO:0008389	MF	13	coumarin 7-hydroxylase activity	1	ENSDARG00000101195,ENSDARG00000101789
0.0209	9	115	3	0.026	0.333	GO:0005432	MF	4	calcium:sodium antiporter activity	1	ENSDARG00000004931,ENSDARG00000055154,ENSDARG00000100592
0.0383	10	31	3	0.097	0.3	HP:0003265	hp	18	Neonatal hyperbilirubinemia	1	ENSDARG00000006220,ENSDARG00000089507,ENSDARG00000097491
0.0483	196	31	8	0.258	0.041	HP:0001298	hp	8	Encephalopathy	1	ENSDARG00000005713,ENSDARG00000006220,ENSDARG00000058606,ENSDARG00000089507,ENSDARG00000091130,ENSDARG00000097491,ENSDARG00000099096,ENSDARG00000102064
0.0269	9	31	3	0.097	0.333	HP:0040279	hp	5	Frequency	1	ENSDARG00000006220,ENSDARG00000089507,ENSDARG00000097491
0.0269	9	31	3	0.097	0.333	HP:0040284	hp	5	Very rare	2	ENSDARG00000006220,ENSDARG00000089507,ENSDARG00000097491
0.0113	7	31	3	0.097	0.429	HP:0008176	hp	16	Neonatal unconjugated hyperbilirubinemia	1	ENSDARG00000006220,ENSDARG00000089507,ENSDARG00000097491
0.00274	33	31	5	0.161	0.152	HP:0100021	hp	22	Cerebral palsy	1	ENSDARG00000006220,ENSDARG00000061896,ENSDARG00000089507,ENSDARG00000097491,ENSDARG00000102773
0.0113	7	31	3	0.097	0.429	HP:0001343	hp	1	Kernicterus	1	ENSDARG00000006220,ENSDARG00000089507,ENSDARG00000097491
0.00174	35	32	4	0.125	0.114	KEGG:00980	keg	20	Metabolism of xenobiotics by cytochrome P450	1	ENSDARG00000006220,ENSDARG00000068934,ENSDARG00000098315,ENSDARG00000104068
0.0334	33	32	3	0.094	0.091	KEGG:00140	keg	21	Steroid hormone biosynthesis	1	ENSDARG00000006220,ENSDARG00000068934,ENSDARG00000098315
ENSEMBL ID	GeneSymbol	Description
ENSDARG00000002026	QKIB	QKI, KH domain containing, RNA binding b [Source:ZFIN;Acc:ZDB-GENE-081028-54]
ENSDARG00000003544	ADARB1B	adenosine deaminase, RNA-specific, B1b [Source:ZFIN;Acc:ZDB-GENE-030219-15]
ENSDARG00000003902	CTSL.1	cathepsin L.1 [Source:ZFIN;Acc:ZDB-GENE-040718-61]
ENSDARG00000004789	LRP1BA	low density lipoprotein receptor-related protein 1Ba [Source:ZFIN;Acc:ZDB-GENE-050208-608]
ENSDARG00000004931	SLC8A3	solute carrier family 8 (sodium/calcium exchanger), member 3 [Source:ZFIN;Acc:ZDB-GENE-050810-1]
ENSDARG00000005713	ETHE1	ethylmalonic encephalopathy 1 [Source:ZFIN;Acc:ZDB-GENE-040426-2503]
ENSDARG00000005915	TCF3A	transcription factor 3a [Source:ZFIN;Acc:ZDB-GENE-990415-51]
ENSDARG00000006094	IGF2R	insulin-like growth factor 2 receptor [Source:ZFIN;Acc:ZDB-GENE-041014-300]
ENSDARG00000006220	UGT1AB	UDP glucuronosyltransferase 1 family a, b [Source:ZFIN;Acc:ZDB-GENE-040426-2762]
ENSDARG00000008398	CACNA1C	calcium channel, voltage-dependent, L type, alpha 1C subunit [Source:ZFIN;Acc:ZDB-GENE-020129-1]
ENSDARG00000010565	AQP4	aquaporin 4 [Source:ZFIN;Acc:ZDB-GENE-040724-152]
ENSDARG00000012499	PER1B	period circadian clock 1b [Source:ZFIN;Acc:ZDB-GENE-040419-1]
ENSDARG00000012586	FMNL2A	formin-like 2a [Source:ZFIN;Acc:ZDB-GENE-081105-70]
ENSDARG00000012699	BBX	bobby sox homolog (Drosophila) [Source:ZFIN;Acc:ZDB-GENE-091204-306]
ENSDARG00000014854	REEP1	receptor accessory protein 1 [Source:ZFIN;Acc:ZDB-GENE-110411-267]
ENSDARG00000016348	DIP2BB	disco-interacting protein 2 homolog Bb [Source:ZFIN;Acc:ZDB-GENE-100729-4]
ENSDARG00000016490	RAB11FIP3	RAB11 family interacting protein 3 (class II) [Source:ZFIN;Acc:ZDB-GENE-040724-138]
ENSDARG00000016667	GABBR1B	gamma-aminobutyric acid (GABA) B receptor, 1b [Source:ZFIN;Acc:ZDB-GENE-060503-5]
ENSDARG00000017034	SQRDL	sulfide quinone reductase-like (yeast) [Source:ZFIN;Acc:ZDB-GENE-050417-436]
ENSDARG00000017220	OTUD7B	OTU deubiquitinase 7B [Source:ZFIN;Acc:ZDB-GENE-060616-1]
ENSDARG00000017365	SLC23A2	solute carrier family 23 (ascorbic acid transporter), member 2 [Source:ZFIN;Acc:ZDB-GENE-090521-3]
ENSDARG00000018773	HIVEP2B	human immunodeficiency virus type I enhancer binding protein 2b [Source:ZFIN;Acc:ZDB-GENE-130530-562]
ENSDARG00000019949	SERPINH1B	serpin peptidase inhibitor, clade H (heat shock protein 47), member 1b [Source:ZFIN;Acc:ZDB-GENE-990415-93]
ENSDARG00000019963	SFXN1	sideroflexin 1 [Source:ZFIN;Acc:ZDB-GENE-040801-45]
ENSDARG00000020845	TNS1B	tensin 1b [Source:ZFIN;Acc:ZDB-GENE-030131-6933]
ENSDARG00000021305	SLC30A2	solute carrier family 30 (zinc transporter), member 2 [Source:ZFIN;Acc:ZDB-GENE-041014-347]
ENSDARG00000025206	SYT2A	synaptotagmin IIa [Source:ZFIN;Acc:ZDB-GENE-060503-315]
ENSDARG00000026988	TBC1D22B	TBC1 domain family, member 22B [Source:ZFIN;Acc:ZDB-GENE-091118-28]
ENSDARG00000027088	PTGDSB.1	prostaglandin D2 synthase b, tandem duplicate 1 [Source:ZFIN;Acc:ZDB-GENE-030131-8436]
ENSDARG00000027497	MAST1A	microtubule associated serine/threonine kinase 1a [Source:ZFIN;Acc:ZDB-GENE-121214-221]
ENSDARG00000028396	FKBP5	FK506 binding protein 5 [Source:ZFIN;Acc:ZDB-GENE-030616-630]
ENSDARG00000028857	SGSM1A	small G protein signaling modulator 1a [Source:ZFIN;Acc:ZDB-GENE-060526-379]
ENSDARG00000030896	FOXQ1A	forkhead box Q1a [Source:ZFIN;Acc:ZDB-GENE-070424-74]
ENSDARG00000033840	FAT3A	FAT atypical cadherin 3a [Source:ZFIN;Acc:ZDB-GENE-060929-1254]
ENSDARG00000034503	PER2	period circadian clock 2 [Source:ZFIN;Acc:ZDB-GENE-011220-2]
ENSDARG00000035127	RXRAB	retinoid x receptor, alpha b [Source:ZFIN;Acc:ZDB-GENE-990415-243]
ENSDARG00000035133	PHO	phoenix [Source:ZFIN;Acc:ZDB-GENE-030131-5935]
ENSDARG00000035308	GRB10B	growth factor receptor-bound protein 10b [Source:ZFIN;Acc:ZDB-GENE-091020-12]
ENSDARG00000036156	FNBP1A	formin binding protein 1a [Source:ZFIN;Acc:ZDB-GENE-081105-105]
ENSDARG00000036626	SEMA6BA	sema domain, transmembrane domain (TM), and cytoplasmic domain, (semaphorin) 6Ba [Source:ZFIN;Acc:ZDB-GENE-131024-1]
ENSDARG00000036985	PLXNB2B	plexin b2b [Source:ZFIN;Acc:ZDB-GENE-080902-1]
ENSDARG00000039901	SH3GL2	SH3 domain containing GRB2 like 2, endophilin A1 [Source:HGNC Symbol;Acc:HGNC:10831]
ENSDARG00000042492	SI:DKEY-250D21.1	si:dkey-250d21.1 [Source:ZFIN;Acc:ZDB-GENE-030131-8276]
ENSDARG00000043627	TBC1D9B	TBC1 domain family member 9B [Source:HGNC Symbol;Acc:HGNC:29097]
ENSDARG00000043646	SLC6A8	solute carrier family 6 (neurotransmitter transporter), member 8 [Source:ZFIN;Acc:ZDB-GENE-071024-2]
ENSDARG00000045768	CRY1AA	cryptochrome circadian clock 1aa [Source:ZFIN;Acc:ZDB-GENE-010426-2]
ENSDARG00000052215	BTR02	bloodthirsty-related gene family, member 2 [Source:ZFIN;Acc:ZDB-GENE-060825-228]
ENSDARG00000052618	AHRRB	aryl-hydrocarbon receptor repressor b [Source:ZFIN;Acc:ZDB-GENE-051018-2]
ENSDARG00000054003	RARGB	retinoic acid receptor, gamma b [Source:ZFIN;Acc:ZDB-GENE-070314-1]
ENSDARG00000054771	GHRA	growth hormone receptor a [Source:ZFIN;Acc:ZDB-GENE-070509-1]
ENSDARG00000055154	SLC8A4A	solute carrier family 8 (sodium/calcium exchanger), member 4a [Source:ZFIN;Acc:ZDB-GENE-060110-2]
ENSDARG00000056885	PER1A	period circadian clock 1a [Source:ZFIN;Acc:ZDB-GENE-011220-1]
ENSDARG00000057107	VAV3	si:ch73-383g2.1 [Source:ZFIN;Acc:ZDB-GENE-131121-54]
ENSDARG00000057903	SI:CH211-266G18.10	si:ch211-266g18.10 [Source:ZFIN;Acc:ZDB-GENE-131127-188]
ENSDARG00000058248	SI:DKEYP-77H1.4	si:dkeyp-77h1.4 [Source:ZFIN;Acc:ZDB-GENE-050208-18]
ENSDARG00000058606	SIK1	salt-inducible kinase 1 [Source:ZFIN;Acc:ZDB-GENE-030131-9446]
ENSDARG00000058679	ZGC:114104	zgc:114104 [Source:ZFIN;Acc:ZDB-GENE-050913-63]
ENSDARG00000058702	VAX2	ventral anterior homeobox 2 [Source:ZFIN;Acc:ZDB-GENE-030904-8]
ENSDARG00000058771	NAV1B	neuron navigator 1b [Source:ZFIN;Acc:ZDB-GENE-120215-84]
ENSDARG00000059001	PIM2	Pim-2 proto-oncogene, serine/threonine kinase [Source:ZFIN;Acc:ZDB-GENE-000831-6]
ENSDARG00000060148	SH3PXD2AA	SH3 and PX domains 2Aa [Source:ZFIN;Acc:ZDB-GENE-060503-271]
ENSDARG00000060309	SRGAP3	SLIT-ROBO Rho GTPase activating protein 3 [Source:ZFIN;Acc:ZDB-GENE-060524-4]
ENSDARG00000060551	RPS6KA5	ribosomal protein S6 kinase, polypeptide 5 [Source:ZFIN;Acc:ZDB-GENE-130530-693]
ENSDARG00000060865	SCAI	suppressor of cancer cell invasion [Source:ZFIN;Acc:ZDB-GENE-060526-57]
ENSDARG00000061248	XYLT1	xylosyltransferase I [Source:ZFIN;Acc:ZDB-GENE-111017-2]
ENSDARG00000061481	WU:FJ05G07	wu:fj05g07 [Source:ZFIN;Acc:ZDB-GENE-030131-7307]
ENSDARG00000061634	AIFM4	apoptosis-inducing factor, mitochondrion-associated, 4 [Source:ZFIN;Acc:ZDB-GENE-070112-2282]
ENSDARG00000061635	MYO5AA	myosin VAa [Source:ZFIN;Acc:ZDB-GENE-041027-2]
ENSDARG00000061896	SLCO2A1	solute carrier organic anion transporter family, member 2A1 [Source:ZFIN;Acc:ZDB-GENE-060606-3]
ENSDARG00000061992	DOT1L	DOT1-like histone H3K79 methyltransferase [Source:ZFIN;Acc:ZDB-GENE-060503-341]
ENSDARG00000062248	PTPN21	protein tyrosine phosphatase, non-receptor type 21 [Source:ZFIN;Acc:ZDB-GENE-080102-4]
ENSDARG00000062974	ITGA2.2	integrin, alpha 2 (CD49B, alpha 2 subunit of VLA-2 receptor), tandem duplicate 2 [Source:ZFIN;Acc:ZDB-GENE-091118-70]
ENSDARG00000063361	SI:CH211-1E14.1	si:ch211-1e14.1 [Source:ZFIN;Acc:ZDB-GENE-050420-149]
ENSDARG00000063594	HIPK1A	homeodomain interacting protein kinase 1a [Source:ZFIN;Acc:ZDB-GENE-081031-101]
ENSDARG00000068934	CYP1B1	cytochrome P450, family 1, subfamily B, polypeptide 1 [Source:ZFIN;Acc:ZDB-GENE-030902-1]
ENSDARG00000070214	SLC41A1	solute carrier family 41 (magnesium transporter), member 1 [Source:ZFIN;Acc:ZDB-GENE-030131-4700]
ENSDARG00000071567	TSTD1	si:dkey-34l15.1 [Source:ZFIN;Acc:ZDB-GENE-081107-63]
ENSDARG00000073912	SI:CH211-202H22.7	si:ch211-202h22.7 [Source:ZFIN;Acc:ZDB-GENE-090313-77]
ENSDARG00000074245	SPEN	spen family transcriptional repressor [Source:ZFIN;Acc:ZDB-GENE-050309-70]
ENSDARG00000074723	MYO10L1	myosin X-like 1 [Source:ZFIN;Acc:ZDB-GENE-080425-1]
ENSDARG00000074905	CAMK1DA	calcium/calmodulin-dependent protein kinase 1Da [Source:ZFIN;Acc:ZDB-GENE-080402-7]
ENSDARG00000075230	TET1	tet methylcytosine dioxygenase 1 [Source:ZFIN;Acc:ZDB-GENE-090312-88]
ENSDARG00000075928	HIVEP3A	human immunodeficiency virus type I enhancer binding protein 3a [Source:ZFIN;Acc:ZDB-GENE-081029-2]
ENSDARG00000076041	WWC1	WW and C2 domain containing 1 [Source:ZFIN;Acc:ZDB-GENE-091118-8]
ENSDARG00000076292	TNS2A	tensin 2a [Source:ZFIN;Acc:ZDB-GENE-090312-163]
ENSDARG00000076830	SI:DKEY-65B12.6	si:dkey-65b12.6 [Source:ZFIN;Acc:ZDB-GENE-060526-329]
ENSDARG00000076856	FREM2A	Fras1 related extracellular matrix protein 2a [Source:ZFIN;Acc:ZDB-GENE-081119-3]
ENSDARG00000076991	DOLK	dolichol kinase [Source:ZFIN;Acc:ZDB-GENE-070410-59]
ENSDARG00000078227	CSPG4	chondroitin sulfate proteoglycan 4 [Source:ZFIN;Acc:ZDB-GENE-050519-1]
ENSDARG00000078327	CEP170B	si:ch73-212j7.1 [Source:ZFIN;Acc:ZDB-GENE-081104-258]
ENSDARG00000078567	LONRF1L	LON peptidase N-terminal domain and ring finger 1, like [Source:ZFIN;Acc:ZDB-GENE-081104-397]
ENSDARG00000079064	PDE2A	phosphodiesterase 2A [Source:HGNC Symbol;Acc:HGNC:8777]
ENSDARG00000079491	KCNA3A	potassium voltage-gated channel, shaker-related subfamily, member 3a [Source:ZFIN;Acc:ZDB-GENE-130530-873]
ENSDARG00000079741	CABZ01075131.1	N/A
ENSDARG00000079878	TMEM151BB	transmembrane protein 151Bb [Source:ZFIN;Acc:ZDB-GENE-131125-107]
ENSDARG00000086826	SULT6B1	sulfotransferase family, cytosolic, 6b, member 1 [Source:ZFIN;Acc:ZDB-GENE-050417-228]
ENSDARG00000089507	UGT1B5	UDP glucuronosyltransferase 1 family, polypeptide B5 [Source:ZFIN;Acc:ZDB-GENE-080227-14]
ENSDARG00000089697	NFE2L2B	nuclear factor, erythroid 2-like 2b [Source:ZFIN;Acc:ZDB-GENE-120320-3]
ENSDARG00000089936	SEPW2B	selenoprotein W, 2b [Source:ZFIN;Acc:ZDB-GENE-030428-2]
ENSDARG00000091116	PKHD1L1	polycystic kidney and hepatic disease 1 (autosomal recessive)-like 1 [Source:ZFIN;Acc:ZDB-GENE-060503-475]
ENSDARG00000091130	KCNQ2B	potassium voltage-gated channel, KQT-like subfamily, member 2b [Source:ZFIN;Acc:ZDB-GENE-120130-1]
ENSDARG00000091715	SI:DKEY-162H11.2	si:dkey-162h11.2 [Source:ZFIN;Acc:ZDB-GENE-121214-90]
ENSDARG00000097491	UGT1B1	UDP glucuronosyltransferase 1 family, polypeptide B1 [Source:ZFIN;Acc:ZDB-GENE-080227-10]
ENSDARG00000098315	CYP1A	cytochrome P450, family 1, subfamily A [Source:ZFIN;Acc:ZDB-GENE-011219-1]
ENSDARG00000098511	NTRK2B	neurotrophic tyrosine kinase, receptor, type 2b [Source:ZFIN;Acc:ZDB-GENE-010126-2]
ENSDARG00000098605	SLX1B	SLX1 homolog B, structure-specific endonuclease subunit [Source:ZFIN;Acc:ZDB-GENE-130530-826]
ENSDARG00000098746	DHRS13L1	dehydrogenase/reductase (SDR family) member 13 like 1 [Source:ZFIN;Acc:ZDB-GENE-040426-1907]
ENSDARG00000098857	LIFRA	leukemia inhibitory factor receptor alpha a [Source:ZFIN;Acc:ZDB-GENE-050327-16]
ENSDARG00000099024	SI:CH211-188P14.5	si:ch211-188p14.5 [Source:ZFIN;Acc:ZDB-GENE-121214-312]
ENSDARG00000099096	GABRB4	gamma-aminobutyric acid (GABA) A receptor, beta 4 [Source:ZFIN;Acc:ZDB-GENE-070424-211]
ENSDARG00000099199	ITCHB	itchy E3 ubiquitin protein ligase b [Source:ZFIN;Acc:ZDB-GENE-131024-2]
ENSDARG00000099364	BX511034.6	N/A
ENSDARG00000099437	SI:CH1073-268J14.1	si:ch1073-268j14.1 [Source:ZFIN;Acc:ZDB-GENE-141216-172]
ENSDARG00000099702	CABZ01103755.1	N/A
ENSDARG00000100592	SLC8A2B	solute carrier family 8 (sodium/calcium exchanger), member 2b [Source:ZFIN;Acc:ZDB-GENE-050419-209]
ENSDARG00000101195	CYP1C1	cytochrome P450, family 1, subfamily C, polypeptide 1 [Source:ZFIN;Acc:ZDB-GENE-050522-501]
ENSDARG00000101364	WFIKKN1	WAP, follistatin/kazal, immunoglobulin, kunitz and netrin domain containing 1 [Source:ZFIN;Acc:ZDB-GENE-040426-2465]
ENSDARG00000101687	CU929259.1	N/A
ENSDARG00000101789	CYP1C2	cytochrome P450, family 1, subfamily C, polypeptide 2 [Source:ZFIN;Acc:ZDB-GENE-050705-1]
ENSDARG00000102064	KCNA2B	potassium voltage-gated channel, shaker-related subfamily, member 2b [Source:ZFIN;Acc:ZDB-GENE-080204-89]
ENSDARG00000102142	ECE2B	endothelin converting enzyme 2b [Source:ZFIN;Acc:ZDB-GENE-131120-140]
ENSDARG00000102478	ADAMTS7	ADAM metallopeptidase with thrombospondin type 1 motif 7 [Source:HGNC Symbol;Acc:HGNC:223]
ENSDARG00000102612	SLC15A4	solute carrier family 15 (oligopeptide transporter), member 4 [Source:ZFIN;Acc:ZDB-GENE-040426-1047]
ENSDARG00000102773	CACNA1DA	calcium channel, voltage-dependent, L type, alpha 1D subunit, a [Source:ZFIN;Acc:ZDB-GENE-030616-135]
ENSDARG00000104068	GSTP1	glutathione S-transferase pi 1 [Source:ZFIN;Acc:ZDB-GENE-020806-4]
ENSDARG00000104283	CDC42BPAA	CDC42 binding protein kinase alpha (DMPK-like) a [Source:ZFIN;Acc:ZDB-GENE-120727-12]
ENSDARG00000104292	CTGFB	connective tissue growth factor b [Source:ZFIN;Acc:ZDB-GENE-070705-82]
ENSDARG00000104483	GIPC1	GIPC PDZ domain containing family, member 1 [Source:ZFIN;Acc:ZDB-GENE-060726-1]
ENSDARG00000105104	SI:DKEY-223P19.1	si:dkey-223p19.1 [Source:ZFIN;Acc:ZDB-GENE-120215-140]
ENSDARG00000106418	CABZ01066921.1	N/A

## Sheet: Fluoran
p-value	T	Q	Q&T	Q&T/Q	Q&T/T	term ID	t type	t group	t name	t depth	Q&T list
0.0243	59	21	3	0.143	0.051	GO:0048511	BP	3	rhythmic process	1	ENSDARG00000012499,ENSDARG00000034503,ENSDARG00000045768
0.0166	52	21	3	0.143	0.058	GO:0007623	BP	3	circadian rhythm	2	ENSDARG00000012499,ENSDARG00000034503,ENSDARG00000045768
0.000169	12	21	3	0.143	0.25	GO:0042752	BP	3	regulation of circadian rhythm	1	ENSDARG00000012499,ENSDARG00000034503,ENSDARG00000045768
0.00269	3	21	2	0.095	0.667	GO:0009649	BP	3	entrainment of circadian clock	2	ENSDARG00000034503,ENSDARG00000045768
0.00897	5	21	2	0.095	0.4	GO:0042542	BP	1	response to hydrogen peroxide	1	ENSDARG00000034503,ENSDARG00000045768
ENSEMBL ID	GeneSymbol	Description
ENSDARG00000002311	FABP11B	fatty acid binding protein 11b [Source:ZFIN;Acc:ZDB-GENE-050522-391]
ENSDARG00000010658	INSIG1	insulin induced gene 1 [Source:ZFIN;Acc:ZDB-GENE-030131-6121]
ENSDARG00000012499	PER1B	period circadian clock 1b [Source:ZFIN;Acc:ZDB-GENE-040419-1]
ENSDARG00000019949	SERPINH1B	serpin peptidase inhibitor, clade H (heat shock protein 47), member 1b [Source:ZFIN;Acc:ZDB-GENE-990415-93]
ENSDARG00000028804	ANKRD9	ankyrin repeat domain 9 [Source:ZFIN;Acc:ZDB-GENE-041114-3]
ENSDARG00000034503	PER2	period circadian clock 2 [Source:ZFIN;Acc:ZDB-GENE-011220-2]
ENSDARG00000038729	S100Z	S100 calcium binding protein Z [Source:ZFIN;Acc:ZDB-GENE-050522-69]
ENSDARG00000042816	MMP9	matrix metallopeptidase 9 [Source:ZFIN;Acc:ZDB-GENE-040426-2132]
ENSDARG00000045768	CRY1AA	cryptochrome circadian clock 1aa [Source:ZFIN;Acc:ZDB-GENE-010426-2]
ENSDARG00000058606	SIK1	salt-inducible kinase 1 [Source:ZFIN;Acc:ZDB-GENE-030131-9446]
ENSDARG00000058679	ZGC:114104	zgc:114104 [Source:ZFIN;Acc:ZDB-GENE-050913-63]
ENSDARG00000059001	PIM2	Pim-2 proto-oncogene, serine/threonine kinase [Source:ZFIN;Acc:ZDB-GENE-000831-6]
ENSDARG00000061274	LSS	lanosterol synthase (2,3-oxidosqualene-lanosterol cyclase) [Source:ZFIN;Acc:ZDB-GENE-050119-7]
ENSDARG00000071341	ABCH1	ATP-binding cassette, sub-family H, member 1 [Source:ZFIN;Acc:ZDB-GENE-050517-42]
ENSDARG00000078567	LONRF1L	LON peptidase N-terminal domain and ring finger 1, like [Source:ZFIN;Acc:ZDB-GENE-081104-397]
ENSDARG00000088137	ADGRG2A	adhesion G protein-coupled receptor G2a [Source:ZFIN;Acc:ZDB-GENE-140106-206]
ENSDARG00000088140	HSD17B7	hydroxysteroid (17-beta) dehydrogenase 7 [Source:ZFIN;Acc:ZDB-GENE-061013-378]
ENSDARG00000098761	RGS2	regulator of G protein signaling 2 [Source:ZFIN;Acc:ZDB-GENE-040718-410]
ENSDARG00000102435	PLEKHF1	pleckstrin homology domain containing, family F (with FYVE domain) member 1 [Source:ZFIN;Acc:ZDB-GENE-040426-1289]
ENSDARG00000104687	SLC16A9B	solute carrier family 16, member 9b [Source:ZFIN;Acc:ZDB-GENE-040801-69]
ENSDARG00000105341	SI:DKEY-9L20.3	si:dkey-9l20.3 [Source:ZFIN;Acc:ZDB-GENE-090313-369]

[truncated: 4 more sheets: Acenaph, 2_MN, Phenan, Anthrac]
